# Supplementary material for: Copper nitrate-mediated synthesis of 3-aryl isoxazolines and isoxazoles from olefinic azlactones
Source: Royal Society of Chemistry journal article supplement (doi:10.1039/c9ob00857h), 2019-01-01

## Copper nitrate-mediated synthesis of 3-aryl isoxazolines and isoxazoles from olefinic azlactones

Yifan Lin,<sup>§,†</sup> Ke Zhang,<sup>§,†</sup> Mingchun Gao,<sup>†</sup> Zheyi Jiang,<sup>†</sup> Jiajie Liu,<sup>†</sup> Yurui Ma,<sup>†</sup> Haoyu  
Wang,<sup>†</sup> Qitao Tan,<sup>\*,†</sup> Junjie Xiao,<sup>\*,†</sup> and Bin Xu<sup>\*,†,‡</sup>

<sup>†</sup>Department of Chemistry, Innovative Drug Research Center, Qianweichang College,  
School of Life Science, Shanghai University, Shanghai 200444, China

Tel: (+86) 21-66132830; Fax: (+86) 21-66132830; E-mail: xubin@shu.edu.cn

<sup>‡</sup>State Key Laboratory of Organometallic Chemistry, Shanghai Institute of Organic  
Chemistry, Chinese Academy of Sciences, Shanghai 200032, China

## Supporting Information

### CONTENTS:

|                                                                                                     |     |
|-----------------------------------------------------------------------------------------------------|-----|
| 1. General Information.....                                                                         | S2  |
| 2. Synthesis and Characterization of Substrates.....                                                | S3  |
| 3. Synthesis and Characterization of Products.....                                                  | S8  |
| 4. X-Ray Crystallographic Analysis for Compound 3r.....                                             | S16 |
| 5. Mechanistic Studies.....                                                                         | S17 |
| 6. References.....                                                                                  | S18 |
| 7. Copies of <sup>1</sup> H, <sup>13</sup> C and <sup>19</sup> F NMR Spectra for All Compounds..... | S20 |

## General Information

All reagents were obtained from commercial sources without further purification, and commercially available solvents were purified before use. All new compounds were fully characterized. All melting points were taken on a WRS-1A or a WRS-1B Digital Melting Point Apparatus without correction. Infrared spectra were obtained using an AVATAR 370 FT-IR spectrometer.  $^1\text{H}$ ,  $^{13}\text{C}$  and  $^{19}\text{F}$  NMR spectra were recorded with a Bruker AV-500 spectrometer operating at 500 MHz, 125 MHz and 470 MHz, respectively, with chemical shift values being reported in ppm relative to chloroform ( $\delta = 7.26$  ppm), dimethyl sulfoxide ( $\delta = 2.50$  ppm) or TMS ( $\delta = 0.00$  ppm) for  $^1\text{H}$  NMR; with chloroform ( $\delta = 77.16$  ppm), dimethyl sulfoxide ( $\delta = 39.52$  ppm) for  $^{13}\text{C}$  NMR; with  $\text{C}_6\text{F}_6$  ( $\delta = -164.9$  ppm) for  $^{19}\text{F}$  NMR. Mass spectra (MS) and high resolution mass spectra (HRMS) were recorded with an Agilent 5975C or Thermo Fisher Scientific LTQ FTICR-MS using an Electron impact (EI) or Electrospray ionization (ESI) techniques. The crystal structure was recorded on SMART APEXII X-ray diffraction spectrometer. Silica gel plate GF254 were used for thin layer chromatography (TLC) and silica gel H or 300–400 mesh were used for flash column chromatography. Yields refer to chromatographically and spectroscopically pure compounds, unless otherwise indicated. *N*-Alkylmaleimides **2a–2g** and **2j–2n** are all purchased from commercial sources.

## 2. Synthesis and Characterization of Substrates

### 2.1 Synthesis of Olefinic Azlactones

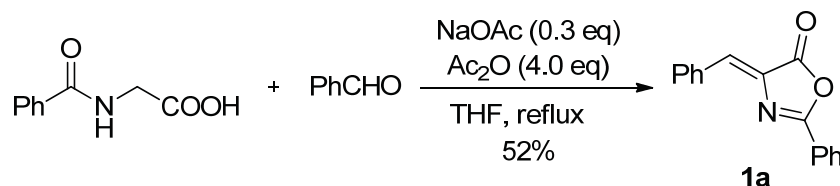

**(Z)-4-Benzylidene-2-phenyloxazol-5(4H)-one (1a):**<sup>1</sup> Hippuric acid (1.80 g, 10 mmol), benzaldehyde (1.27 g, 12.0 mmol), NaOAc (0.25 g, 3.0 mmol) and Ac<sub>2</sub>O (4.0 mL, 40.0 mmol) in THF (30 mL) was reflux for 3 h. Upon completion, the reaction mixture was cooled down to room temperature. A saturated aqueous solution of Na<sub>2</sub>CO<sub>3</sub> was added. The mixture was extracted with CH<sub>2</sub>Cl<sub>2</sub>, dried with Na<sub>2</sub>SO<sub>4</sub>, filtered, and the solvent was removed under vacuum. The given residue was purified by recrystallization from EtOH to give **1a** as a yellow solid (1.30 g, 52%). M.p. 169-171 °C; IR (KBr, cm<sup>-1</sup>): 3056, 1794, 1652, 1589, 1549, 1325, 1293, 1160, 982, 861, 764, 689; <sup>1</sup>H NMR (CDCl<sub>3</sub>, 500 MHz): δ 8.20-8.16 (m, 4H), 7.61 (m, 1H), 7.54-7.43 (m, 5H), 7.23 (s, 1H); <sup>13</sup>C NMR (CDCl<sub>3</sub>, 125 MHz): δ 167.6, 163.5, 133.5, 133.4, 133.3, 132.5, 131.8, 131.2, 129.0, 128.9, 128.4, 125.6.

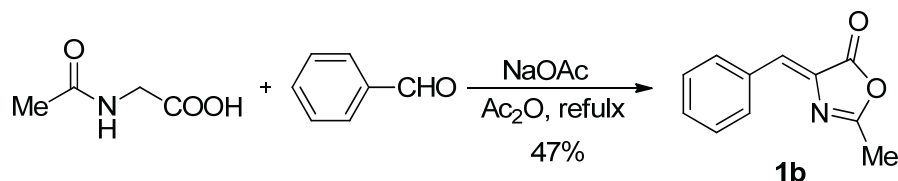

**(Z)-4-Benzylidene-2-methyloxazol-5(4H)-one (1b):**<sup>1</sup> N-Acetylglycine (3.42 g, 29.2 mmol), benzaldehyde (2.4 mL, 24.0 mmol), NaOAc (9.99 g, 122.0 mmol) in Ac<sub>2</sub>O (70 mL) was reflux for 7 h. Upon completion, the reaction mixture was cooled down to room temperature. After being maintained 4 °C overnight. The solid was filtered and washed with water and a little EtOH. The desired product **1b** was obtained as a light yellow solid (2.10 g, 47%). M.p. 152-153 °C; IR (KBr, cm<sup>-1</sup>): 3058, 1774, 1653, 1595, 1261, 1165, 898, 766, 688; <sup>1</sup>H NMR (CDCl<sub>3</sub>, 500 MHz): δ 8.08-8.06 (m, 2H), 7.45-7.43 (m, 3H), 7.14 (s, 1H), 2.40 (s, 3H); <sup>13</sup>C NMR (CDCl<sub>3</sub>, 125 MHz): δ 167.8, 166.1, 133.1, 132.6, 132.2, 131.5, 131.1, 128.9, 15.7.

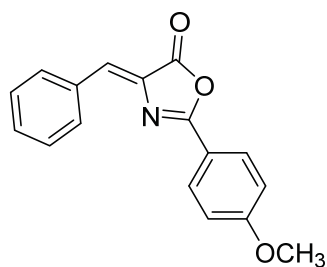

**(Z)-4-Benzylidene-2-(4-methoxyphenyl)oxazol-5(4H)-one (1c):**<sup>2</sup> Following the general procedure as for **1b**, (4-methoxybenzoyl)glycine (836.0 mg, 4.0 mmol), benzaldehyde (808.0 μL, 8.0 mmol), NaOAc (328 mg, 4 mmol) in Ac<sub>2</sub>O (2.5 mL) was

reflux for 1 h. The solid was filtered and washed with water and a little EtOH. The desired product **1c** was obtained as a light yellow solid (248.0 mg, 28%). M.p. 212-214 °C; IR (KBr, cm<sup>-1</sup>): 3000, 2980, 1777, 1648, 1601, 1550, 1503, 1304, 1260, 1165, 981, 876, 840, 764, 685; <sup>1</sup>H NMR (CDCl<sub>3</sub>, 500 MHz): δ 8.19 (d, *J* = 7.2 Hz, 2H), 8.14 (d, *J* = 8.9 Hz, 2H), 7.49-7.42 (m, 3H), 7.19 (s, 1H), 7.03 (d, *J* = 8.9 Hz, 2H), 3.91 (s, 3H); <sup>13</sup>C NMR (CDCl<sub>3</sub>, 125 MHz): δ 168.0, 163.9, 163.4, 133.8, 133.6, 132.3, 130.9, 130.5, 130.2, 128.9, 117.9, 114.5, 55.6. EI-MS *m/z*: 279 [M<sup>+</sup>].

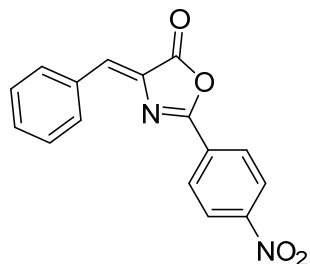

**(Z)-4-Benzylidene-2-(4-nitrophenyl)oxazol-5(4H)-one (1d):**<sup>3</sup> Following the general procedure as for **1b**, (4-nitrobenzoyl)glycine (336.0 mg, 1.5 mmol), benzaldehyde (303.0 μL, 3.0 mmol), NaOAc (615.0 mg, 7.5 mmol) in Ac<sub>2</sub>O (4 mL) was reflux for 1 h. The solid was filtered to give the desired product **1d** as a light yellow solid (441 mg, 49%). M.p. 230-232 °C; IR (KBr, cm<sup>-1</sup>): 3063, 1788, 1651, 1519, 1344, 1318, 1161, 892, 856, 767, 696; <sup>1</sup>H NMR (CDCl<sub>3</sub>, 500 MHz): δ 8.40-8.35 (m, 4H), 8.23-8.21 (m, 2H), 7.52-7.51 (m, 3H), 7.39 (s, 1H); <sup>13</sup>C NMR (CDCl<sub>3</sub>, 125 MHz): δ 166.8, 161.5, 150.4, 134.6, 133.1, 132.9, 132.6, 132.0, 131.2, 129.2, 129.1, 124.2. EI-MS *m/z*: 294 [M<sup>+</sup>].

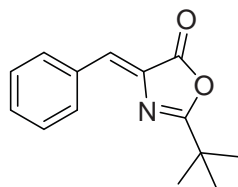

**(Z)-4-Benzylidene-2-(tert-butyl)oxazol-5(4H)-one (1e):**<sup>4</sup> Following the general procedure as for **1b**, pivaloylglycine (286.0 mg, 1.8 mmol), benzaldehyde (152.0 μL, 1.5 mmol), NaOAc (615.0 mg, 7.5 mmol) in Ac<sub>2</sub>O (3 mL) was reflux for 1 h. The solid was filtered and washed with water and a little EtOH. The desired product **1e** was obtained as a light yellow solid (75.4 mg, 22%). M.p. 88-90 °C; IR (KBr, cm<sup>-1</sup>): 3055, 2970, 2871, 1796, 1654, 1590, 1294, 1146, 1017, 859, 765, 692; <sup>1</sup>H NMR (CDCl<sub>3</sub>, 500 MHz): δ 8.12 (dd, *J* = 7.8, 2.5 Hz, 2H), 7.47-7.41 (m, 3H), 7.15 (s, 1H), 1.39 (s, 9H); <sup>13</sup>C NMR (CDCl<sub>3</sub>, 125 MHz): δ 174.8, 168.3, 133.3, 133.0, 132.3, 131.5, 131.0, 128.8, 34.4, 27.0; EI-MS *m/z*: 229 [M<sup>+</sup>].

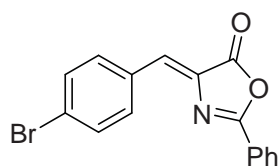

**(Z)-4-(4-Bromobenzylidene)-2-phenyloxazol-5(4H)-one (1f):**<sup>1</sup> Following the general procedure as for **1a**, hippuric acid (358.5 mg, 2.0 mmol), 4-bromo-

benzaldehyde (444.0 mg, 2.4 mmol), NaOAc (49.2 mg, 0.6 mmol), Ac<sub>2</sub>O (0.8 mL, 8.0 mmol) in THF (8 mL) was reflux for 3 h. The given residue was purified by recrystallization from ethyl acetate/DCM to give **1f** as a light yellow solid (435.0 mg, 66%). M.p. 207-208 °C; IR (KBr, cm<sup>-1</sup>): 3054, 1794, 1650, 1554, 1482, 1158, 1067, 983, 893, 824, 694; <sup>1</sup>H NMR (CDCl<sub>3</sub>, 500 MHz): δ 8.18 (d, *J* = 7.4 Hz, 2H), 8.07 (d, *J* = 8.5 Hz, 2H), 7.65-7.60 (m, 3H), 7.54 (t, *J* = 7.8 Hz, 2H), 7.16 (s, 1H); <sup>13</sup>C NMR (CDCl<sub>3</sub>, 125 MHz): δ 167.4, 164.0, 133.8, 133.7, 133.6, 132.4, 132.2, 130.1, 129.0, 128.5, 125.9, 125.4.

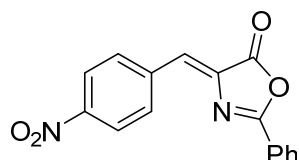

**(Z)-4-(4-Nitrobenzylidene)-2-phenyloxazol-5(4H)-one (1g):**<sup>1</sup> Following the general procedure as for **1a**, hippuric acid (358.5 mg, 2.0 mmol), 4-nitrobenzaldehyde (362.6 mg, 2.4 mmol), NaOAc (49.2mg, 0.6 mmol), Ac<sub>2</sub>O (0.8 mL, 8 mmol) in THF (8 mL) was reflux for 3 h. The solid was filtered and washed with water and a little ethyl acetate. The desired product **1g** was obtained as a light yellow solid (335.7 mg, 57%). M.p. 238-240 °C; IR (KBr, cm<sup>-1</sup>): 3100, 2900, 1796, 1651, 1552, 1517, 1336, 1295, 1160, 976, 858, 688; <sup>1</sup>H NMR (DMSO-*d*<sub>6</sub>, 500 MHz): δ 8.55 (d, *J* = 8.8 Hz, 2H), 8.35 (d, *J* = 8.9 Hz, 2H), 8.19-8.18 (m, 2H), 7.77 (t, *J* = 7.5 Hz, 1H), 7.67 (t, *J* = 8.0 Hz, 2H), 7.48 (s, 1H); <sup>13</sup>C NMR (DMSO-*d*<sub>6</sub>, 125 MHz): δ 166.9, 165.3, 148.3, 140.1, 136.7, 134.8, 133.4, 129.9, 128.9, 127.4, 125.3, 124.4.

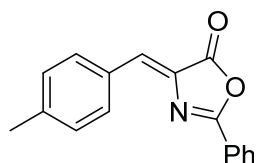

**(Z)-4-(4-Methylbenzylidene)-2-phenyloxazol-5(4H)-one (1h):**<sup>1</sup> Following the general procedure as for **1a**, hippuric acid (537.6 mg, 3.0 mmol), 4-methylbenzaldehyde (425.0 μL, 3.6 mmol), NaOAc (73.8 mg, 0.9 mmol), Ac<sub>2</sub>O (1.2 mL, 12 mmol) in THF (10 mL) was reflux for 3 h. The given residue was purified by recrystallization from EtOH/DCM to give **1h** as a yellow solid (412 mg, 52%). M.p. 144-145 °C; IR (KBr, cm<sup>-1</sup>): 1795, 1649, 1551, 1324, 1157, 859, 816, 692; <sup>1</sup>H NMR (CDCl<sub>3</sub>, 500 MHz): δ 8.17 (d, *J* = 7.4 Hz, 2H), 8.10 (d, *J* = 8.1 Hz, 2H), 7.60 (t, *J* = 7.4 Hz, 1H), 7.52 (t, *J* = 7.8 Hz, 2H), 7.29 (d, *J* = 8.0 Hz, 2H), 7.23 (s, 1H), 2.43 (s, 3H); <sup>13</sup>C NMR (CDCl<sub>3</sub>, 125 MHz): δ 167.8, 163.0, 142.1, 133.2, 132.6, 132.4, 132.1, 130.9, 129.7, 128.9, 128.3, 125.7, 21.8.

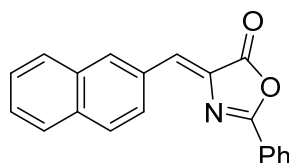

**(Z)-4-(Naphthalen-2-ylmethylene)-2-phenyloxazol-5(4H)-one (1i):**<sup>5</sup> Following the

general procedure as for **1a**, hippuric acid (537.6 mg, 3.0 mmol), 2-naphthaldehyde (562.2 mg, 3.2 mmol), NaOAc (73.8 mg, 0.9 mmol), Ac<sub>2</sub>O (1.2 mL, 12.0 mmol) in THF (10 mL) was reflux for 3 h. The given residue was purified by recrystallization from EtOH/ethyl acetate to give **1i** as a yellow solid (408.5 mg, 45%). M.p. 150-152 °C; IR (KBr, cm<sup>-1</sup>): 3054, 1793, 1650, 1557, 1330, 1161, 912, 879, 692; <sup>1</sup>H NMR (CDCl<sub>3</sub>, 500 MHz): δ 8.52 (d, *J* = 8.5 Hz, 1H), 8.46 (s, 1H), 8.21 (d, *J* = 7.3 Hz, 2H), 7.94-7.90 (m, 2H), 7.85 (d, *J* = 7.8 Hz, 1H), 7.62 (t, *J* = 7.3 Hz, 1H), 7.58-7.52 (m, 4H), 7.39 (s, 1H); <sup>13</sup>C NMR (CDCl<sub>3</sub>, 125 MHz): δ 167.7, 163.4, 134.5, 134.1, 133.3, 133.2, 131.9, 131.3, 129.2, 129.0, 128.7, 128.4, 128.1, 127.9, 127.8, 126.7, 125.7.

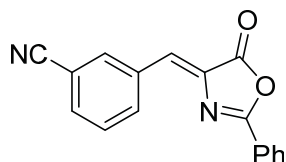

**(Z)-4-(3-Cyanobenzylidene)-2-phenyloxazol-5(4H)-one (1j):**<sup>6</sup> Following the general procedure as for **1a**, hippuric acid (268.5 mg, 1.5 mmol), 3-formylbenzonitrile (236.0 mg, 1.8 mmol), NaOAc (36.9 mg, 0.45 mmol), Ac<sub>2</sub>O (0.6 mL, 6.0 mmol) in THF (8 mL) was reflux for 3 h. The given residue was purified by recrystallization from EtOH to give **1j** as a light yellow solid (268.1 mg, 65%). M.p. 209-211 °C; IR (KBr, cm<sup>-1</sup>): 3080, 2223, 1800, 1653, 1553, 1289, 1166, 989, 922, 879, 688; <sup>1</sup>H NMR (CDCl<sub>3</sub>, 500 MHz): δ 8.67 (s, 1H), 8.27 (d, *J* = 7.9 Hz, 1H), 8.21-8.20 (m, 2H), 7.71 (dt, *J* = 7.8, 1.3 Hz, 1H), 7.68-7.65 (m, 1H), 7.61-7.56 (m, 3H), 7.17 (s, 1H); <sup>13</sup>C NMR (CDCl<sub>3</sub>, 125 MHz): δ 166.8, 165.1, 136.1, 135.3 (two overlapped peaks), 134.6, 134.1, 133.6, 129.7, 129.1, 128.8, 127.9, 125.0, 118.4, 113.4; EI-MS *m/z*: 274 [M<sup>+</sup>].

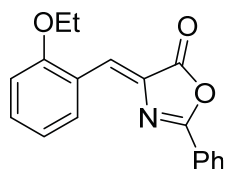

**(Z)-4-(2-Ethoxybenzylidene)-2-phenyloxazol-5(4H)-one (1k):**<sup>1</sup> Following the general procedure as for **1a**, hippuric acid (537.6 mg, 3.0 mmol), 2-ethoxybenzaldehyde (424.0 μL, 3.6 mmol), NaOAc (73.8 mg, 0.9 mmol), Ac<sub>2</sub>O (1.2 mL, 12.0 mmol) in THF (10 mL) was reflux for 3 h. The given residue was purified by recrystallization to give **1k** as a light yellow solid (451.7 mg, 51%). M.p. 180-182 °C; IR (KBr, cm<sup>-1</sup>): 3064, 2984, 2884, 1785, 1644, 1586, 1558, 1446, 1246, 1161, 1037, 980, 859, 754, 689; <sup>1</sup>H NMR (CDCl<sub>3</sub>, 500 MHz): δ 8.88 (dd, *J* = 7.9, 1.7 Hz, 1H), 8.19-8.17 (m, 2H), 7.89 (s, 1H), 7.60 (t, *J* = 7.3 Hz, 1H), 7.54 (t, *J* = 7.8, 2H), 7.42-7.39 (m, 1H), 7.08 (t, *J* = 7.6 Hz, 1H), 6.91 (d, *J* = 8.3 Hz, 1H), 4.13 (q, *J* = 7.0 Hz, 2H), 1.50 (t, *J* = 7.0 Hz, 3H); <sup>13</sup>C NMR (CDCl<sub>3</sub>, 125 MHz): δ 167.9, 162.9, 158.8, 133.1, 133.0 (two overlapped peaks), 132.4, 128.9, 128.3, 126.3, 125.8, 122.7, 120.8, 111.7, 64.2, 14.8; EI-MS *m/z*: 293 [M<sup>+</sup>].

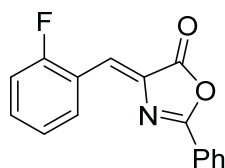

**(Z)-4-(2-Fluorobenzylidene)-2-phenyloxazol-5(4H)-one (11):**<sup>7</sup> Following the general procedure as for **1a**, hippuric acid (537.6 mg, 3.0 mmol), 2-fluorobenzaldehyde (446.8 mg, 3.6 mmol), NaOAc (73.8 mg, 0.9 mmol), Ac<sub>2</sub>O (1.2 mL, 12.0 mmol) in THF (10 mL) was reflux for 3 h. The given residue was purified by recrystallization to give **11** as a yellow solid (548.8 mg, 68%). M.p. 172-174 °C; IR (KBr, cm<sup>-1</sup>): 3061, 3001, 1796, 1651, 1601, 1558, 1444, 1327, 1292, 1203, 985, 871, 761, 690; <sup>1</sup>H NMR (CDCl<sub>3</sub>, 500 MHz): δ 8.89 (t, *J* = 7.4 Hz, 1H), 8.19 (d, *J* = 7.5 Hz, 2H), 7.63 (t, *J* = 7.4 Hz, 1H), 7.58 (s, 1H), 7.54 (t, *J* = 7.8 Hz, 2H), 7.46-7.42 (m, 1H), 7.30 (t, *J* = 7.6 Hz, 1H), 7.13 (t, *J* = 9.5 Hz, 1H); <sup>19</sup>F NMR (CDCl<sub>3</sub>, 470 MHz): δ -114.0 (m, Ar-F); <sup>13</sup>C NMR (CDCl<sub>3</sub>, 125 MHz): δ 167.1, 164.2, 162.0 (d, <sup>1</sup>*J*<sub>C-F</sub> = 256.7 Hz), 134.2, 133.6, 132.9 (d, <sup>3</sup>*J*<sub>C-F</sub> = 8.8 Hz), 132.7, 129.0, 128.5, 125.4, 124.6 (d, <sup>3</sup>*J*<sub>C-F</sub> = 3.6 Hz), 122.3 (d, <sup>3</sup>*J*<sub>C-F</sub> = 7.5 Hz), 121.8 (d, <sup>2</sup>*J*<sub>C-F</sub> = 10.7 Hz), 115.6 (d, <sup>2</sup>*J*<sub>C-F</sub> = 21.9 Hz); LC-MS (ESI) *m/z*: 268 [M+H]<sup>+</sup>.

## 2.2. Synthesis of *N*-Alkylisothiazol-3(2*H*)-one 1,1-dioxides

*N*-Alkylisothiazol-3(2*H*)-one 1,1-dioxides **2h–2i** are prepared as follows:

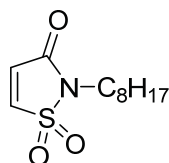

**2-Octylisothiazol-3(2*H*)-one 1,1-dioxide (2h):** To a solution of 2-octylisothiazol-3(2*H*)-one (410.0 μL, 2.0 mmol) in DCM (10 mL) at 25 °C is added *m*-CPBA (85%, 803.0 mg, 4.6 mmol) and the resulting mixture is stirred at room temperature for 15 h. The mixture was filtered through a pad of silica gel and washed with DCM. A saturated aqueous solution of NaHCO<sub>3</sub> was added, the organics were extracted with DCM, dried with Na<sub>2</sub>SO<sub>4</sub>, filtered and the solvent was removed under vacuum. The given residue was purified by recrystallization from hexane/DCM to give **2h** (380 mg, 78%) as a colorless liquid. IR (KBr, cm<sup>-1</sup>): 3092, 2927, 2859, 1735, 1320, 1163, 918, 856, 790, 671; <sup>1</sup>H NMR (CDCl<sub>3</sub>, 500 MHz): δ 7.37 (d, *J* = 7.2 Hz, 1H), 6.77 (d, *J* = 7.2 Hz, 1H), 3.64 (t, *J* = 7.5 Hz, 2H), 1.80-1.73 (m, 2H), 1.36-1.20 (m, 10H), 0.88 (t, *J* = 6.9 Hz, 3H); <sup>13</sup>C NMR (CDCl<sub>3</sub>, 125 MHz): δ 159.2, 138.4, 129.2, 39.8, 31.7, 29.1, 28.9, 28.1, 26.7, 22.6, 14.1; LC-MS (DART Positive) *m/z*: 246 [M+H]<sup>+</sup>; HRMS (DART, Positive) calcd for C<sub>11</sub>H<sub>23</sub>O<sub>3</sub>N<sub>2</sub>S [M+NH<sub>4</sub>]<sup>+</sup> 263.1424, found 263.1422.

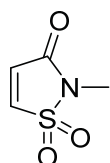

**2-Methylisothiazol-3(2H)-one 1,1-dioxide (2i):** To a solution of 2-methylisothiazol-3(2H)-one (203.3 mg, 2.0 mmol) in DCM (10 mL) at 25 °C is added *m*-CPBA (85%, 803.0 mg, 4.6 mmol) and the resulting mixture is stirred at room temperature for 15 h. The mixture was filtered through a pad of silica gel and washed with DCM. A saturated aqueous solution of NaHCO<sub>3</sub> was added, the organics were extracted with DCM, dried with Na<sub>2</sub>SO<sub>4</sub>, filtered and the solvent was removed under vacuum. The given residue was purified by recrystallization from hexane/DCM to give **2i** (205.2 mg, 85%) as a white solid. M.p. 106-108 °C; IR (KBr, cm<sup>-1</sup>): 3173, 3094, 1741, 1332, 1300, 1163, 915, 856, 785, 668; <sup>1</sup>H NMR (CDCl<sub>3</sub>, 500 MHz): δ 7.42 (d, *J* = 7.4 Hz, 1H), 6.80 (d, *J* = 7.4 Hz, 1H), 3.15 (s, 3H); <sup>13</sup>C NMR (CDCl<sub>3</sub>, 125 MHz): δ 158.8, 138.4, 129.4, 23.5; LC-MS (DART Positive) *m/z*: 148 [M<sup>+</sup>H]; HRMS (ESI) *m/z*: calcd for C<sub>4</sub>H<sub>6</sub>NO<sub>3</sub>S [M+H]<sup>+</sup> 148.0063, found 148.0062.

### 3. Synthesis and Characterization of Products

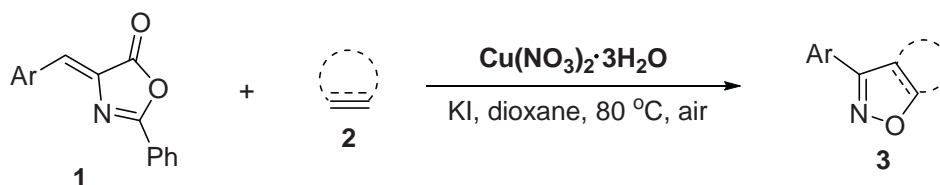

**General Procedure:** To a test tube were added **1** (0.3 mmol), **2** (0.45 mmol), Cu(NO<sub>3</sub>)<sub>2</sub>·3H<sub>2</sub>O (0.6 mmol), KI (0.3 mmol) in dioxane (1.5 mL). The mixture was stirred at 80 °C for 4 h under an air atmosphere as monitored by TLC. Upon completion, the reaction mixture was cooled down to room temperature and the solvent was removed under reduced pressure. The residue was purified by column chromatography on silica gel to give product **3**.

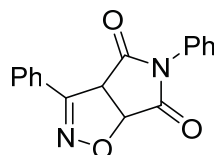

**3,5-Diphenyl-3a,6a-dihydro-4H-pyrrolo[3,4-d]isoxazole-4,6(5H)-dione (3a):**<sup>8</sup> Following the general procedure, the reaction mixture of **1a** (74.7 mg, 0.3 mmol), 1-phenyl-1*H*-pyrrole-2,5-dione **2a** (78.1 mg, 0.45 mmol), Cu(NO<sub>3</sub>)<sub>2</sub>·3H<sub>2</sub>O (145.0 mg, 0.6 mmol), KI (49.8 mg, 0.3 mmol) in dioxane (1.5 mL). After 4 h at 80 °C, purification by column chromatography on silica gel (petroleum ether/ethyl acetate) afforded **3a** (63.6 mg, 73%). M.p. 176-177 °C; IR (KBr, cm<sup>-1</sup>): 3065, 1791, 1719, 1595, 1491, 1448, 1386, 1199; <sup>1</sup>H NMR (CDCl<sub>3</sub>, 500 MHz): δ 8.03 (dd, *J* = 7.6, 1.5 Hz, 2H), 7.49-7.39 (m, 6H), 7.28-7.26 (m, 2H), 5.66 (d, *J* = 9.7 Hz, 1H), 4.97 (d, *J* = 9.7 Hz, 1H); <sup>13</sup>C NMR (CDCl<sub>3</sub>, 125 MHz): δ 170.8, 169.8, 152.8, 131.3, 130.8, 129.3, 129.2, 128.9, 128.1, 126.7, 126.2, 80.4, 54.9; EI-MS *m/z*: 292 [M<sup>+</sup>]; HRMS (EI) *m/z*: calcd for C<sub>17</sub>H<sub>12</sub>N<sub>2</sub>O<sub>3</sub> [M<sup>+</sup>] 292.0848, found 292.0844.



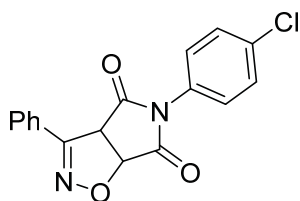

**5-(4-Chlorophenyl)-3-phenyl-3a,6a-dihydro-4H-pyrrolo[3,4-d]isoxazole-4,6(5H)-dione (3b):** Following the general procedure, the reaction mixture of **1a** (74.7 mg, 0.3 mmol), 1-(4-chlorophenyl)-1*H*-pyrrole-2,5-dione **2b** (93.6 mg, 0.45 mmol), Cu(NO<sub>3</sub>)<sub>2</sub>·3H<sub>2</sub>O (145.0 mg, 0.6 mmol), KI (49.8 mg, 0.3 mmol) in dioxane (1.5 mL). After 4 h at 80 °C, purification by column chromatography on silica gel (petroleum ether/ethyl acetate) afforded **3b** (65.7 mg, 67%). M.p. 197-199 °C; IR (KBr, cm<sup>-1</sup>): 3000, 2900, 1723, 1497, 1391, 1193, 894, 830, 759; <sup>1</sup>H NMR (500 MHz, DMSO-*d*<sub>6</sub>): δ 7.95-7.93(m, 2H), 7.56 (d, *J* = 8.8 Hz, 2H), 7.51-7.50 (m, 3H), 7.33 (d, *J* = 8.7 Hz, 2H), 5.74 (d, *J* = 9.7 Hz, 1H), 5.41 (d, *J* = 9.7 Hz, 1H); <sup>13</sup>C NMR (125 MHz, DMSO-*d*<sub>6</sub>): δ 172.3, 171.2, 153.8, 133.8, 131.3, 131.0, 129.6, 129.3, 129.2, 128.4, 127.6, 81.8, 55.8; EI-MS *m/z*: 326 [M<sup>+</sup>]; HRMS (EI) *m/z*: calcd for C<sub>17</sub>H<sub>11</sub>ClN<sub>2</sub>O<sub>3</sub> [M<sup>+</sup>] 326.0458, found 326.0457.

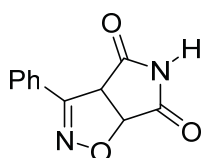

**3-Phenyl-3a,6a-dihydro-4H-pyrrolo[3,4-d]isoxazole-4,6(5H)-dione (3c):**<sup>9</sup> Following the general procedure, the reaction mixture of **1a** (74.7 mg, 0.3 mmol), 1*H*-pyrrole-2,5-dione **2c** (43.7 mg, 0.45 mmol), Cu(NO<sub>3</sub>)<sub>2</sub>·3H<sub>2</sub>O (145.0 mg, 0.6 mmol), KI (49.8 mg, 0.3 mmol) in dioxane (1.5 mL). After 2 h at 80 °C, purification by column chromatography on silica gel (petroleum ether/DCM/ethyl acetate = 5/25/3) afforded **3c** (43.7 mg, 67%). M.p. 220-221 °C; IR (KBr, cm<sup>-1</sup>): 3198, 3094, 1793, 1729, 1563, 1336, 1180, 771; <sup>1</sup>H NMR ((500 MHz, DMSO-*d*<sub>6</sub>): δ 11.89 (s, 1H), 7.90-7.88 (m, 2H), 7.51-7.48 (m, 3H), 5.52 (d, *J* = 9.4 Hz, 1H), 5.15 (d, *J* = 9.4 Hz, 1H); <sup>13</sup>C NMR ((125 MHz, DMSO-*d*<sub>6</sub>): δ 174.8, 173.7, 154.0, 131.2, 129.2, 128.3, 127.6, 82.8, 56.6; EI-MS *m/z*: 216 [M<sup>+</sup>]; HRMS (EI) *m/z*: calcd for C<sub>11</sub>H<sub>8</sub>N<sub>2</sub>O<sub>3</sub> [M<sup>+</sup>] 216.0535, found 216.0541.

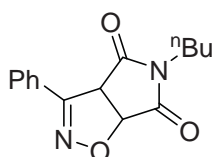

**5-Butyl-3-phenyl-3a,6a-dihydro-4H-pyrrolo[3,4-d]isoxazole-4,6(5H)-dione (3d):** Following the general procedure, the reaction mixture of **1a** (74.8 mg, 0.3 mmol), 1-butyl-1*H*-pyrrole-2,5-dione **2d** (69.2 mg, 0.45 mmol), Cu(NO<sub>3</sub>)<sub>2</sub>·3H<sub>2</sub>O (145.0 mg, 0.6 mmol), KI (49.8 mg, 0.3 mmol) in dioxane (1.5 mL). After 4.5 h at 80 °C, purification by column chromatography on silica gel (petroleum ether/ethyl acetate) afforded **3d** (66.7 mg, 82%). M.p. 82-84 °C; IR (KBr, cm<sup>-1</sup>): 3064, 2952, 1783, 1709, 1444, 1402, 1333; <sup>1</sup>H NMR (CDCl<sub>3</sub>, 500 MHz): δ 7.97-7.95 (m, 2H), 7.47-7.41 (m, 3H), 5.49 (d, *J* = 9.6 Hz, 1H), 4.81 (d, *J* = 9.6 Hz, 1H), 3.54-3.45 (m, 2H), 1.54-1.47

(m, 2H), 1.28-1.20 (m, 2H), 0.86 (t,  $J = 7.4$  Hz, 3H);  $^{13}\text{C}$  NMR ( $\text{CDCl}_3$ , 125 MHz):  $\delta$  172.0, 170.9, 152.8, 131.1, 128.8, 128.0, 126.8, 80.4, 54.9, 39.5, 29.4, 19.9, 13.5; EI-MS  $m/z$ : 272 [ $\text{M}^+$ ]; HRMS (EI)  $m/z$ : calcd for  $\text{C}_{15}\text{H}_{16}\text{N}_2\text{O}_3$  [ $\text{M}^+$ ] 272.1161, found 272.1159.

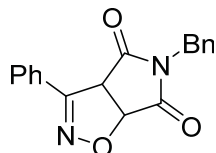

**5-Benzyl-3-phenyl-3a,6a-dihydro-4H-pyrrolo[3,4-d]isoxazole-4,6(5H)-dione (3e):**

Following the general procedure, the reaction mixture of **1a** (74.8 mg, 0.3 mmol), 1-benzyl-1H-pyrrole-2,5-dione **2e** (84.3 mg, 0.45 mmol),  $\text{Cu}(\text{NO}_3)_2 \cdot 3\text{H}_2\text{O}$  (145.0 mg, 0.6 mmol), KI (49.8 mg, 0.3 mmol) in dioxane (1.5 mL). After 4.5 h at 80 °C, purification by column chromatography on silica gel (petroleum ether/ethyl acetate) afforded **3e** (65.1 mg, 71%) as a white solid. M.p. 82-84 °C; IR (KBr,  $\text{cm}^{-1}$ ): 3064, 2952, 1783, 1709, 1444, 1402, 1333;  $^1\text{H}$  NMR ( $\text{CDCl}_3$ , 500 MHz):  $\delta$  7.98 (dd,  $J = 7.7$ , 1.6 Hz, 2H), 7.48-7.43 (m, 3H), 7.36-7.27 (m, 5H), 5.48 (d,  $J = 9.6$  Hz, 1H), 4.79 (d,  $J = 9.6$  Hz, 1H), 4.70 (d,  $J = 14.1$  Hz, 1H), 4.62 (d,  $J = 14.1$  Hz, 1H);  $^{13}\text{C}$  NMR ( $\text{CDCl}_3$ , 125 MHz):  $\delta$  171.5, 170.6, 152.7, 134.6, 131.2, 128.9, 128.8, 128.4, 128.0, 126.8, 80.5, 54.9, 43.3; EI-MS  $m/z$ : 306 [ $\text{M}^+$ ]; HRMS (EI)  $m/z$ : calcd for  $\text{C}_{18}\text{H}_{14}\text{N}_2\text{O}_3$  [ $\text{M}^+$ ] 306.1004, found 306.1006.

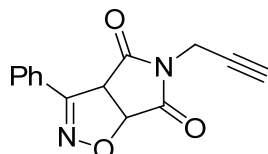

**3-Phenyl-5-(prop-2-yn-1-yl)-3a,6a-dihydro-4H-pyrrolo[3,4-d]isoxazole-4,6(5H)-dione (3f):**

Following the general procedure, the reaction mixture of **1a** (74.7 mg, 0.3 mmol), 1-(prop-2-yn-1-yl)-1H-pyrrole-2,5-dione **2f** (61.0 mg, 0.45 mmol),  $\text{Cu}(\text{NO}_3)_2 \cdot 3\text{H}_2\text{O}$  (145.0 mg, 0.6 mmol), KI (49.8 mg, 0.3 mmol) in dioxane (1.5 mL). After 2.5 h at 60 °C, purification by column chromatography on silica gel (petroleum ether/ethyl acetate) afforded **3f** (31.8 mg, 42%) as a colorless liquid. IR (KBr,  $\text{cm}^{-1}$ ): 3285, 3063, 2974, 1795, 1725, 1425, 1389, 1338, 1180, 1043, 903, 759, 689, 628;  $^1\text{H}$  NMR ( $\text{CDCl}_3$ , 500 MHz):  $\delta$  7.98 (dd,  $J = 7.8$ , 1.4 Hz, 2H), 7.50-7.44 (m, 3H), 5.56 (d,  $J = 9.7$  Hz, 1H), 4.88 (d,  $J = 9.7$  Hz, 1H), 4.33-4.23 (m, 2H), 2.22 (t,  $J = 2.5$  Hz, 1H);  $^{13}\text{C}$  NMR ( $\text{CDCl}_3$ , 125 MHz):  $\delta$  170.3, 169.4, 152.4, 131.3, 128.9, 128.0, 126.6, 80.4, 75.4, 72.5, 55.0, 28.7; LC-MS (DART Positive)  $m/z$ : 255 [ $\text{M}+\text{H}^+$ ]; HRMS (DART Positive)  $m/z$ : calcd for  $\text{C}_{14}\text{H}_{11}\text{N}_3\text{O}_2$  [ $\text{M}+\text{H}^+$ ] 255.0764, found 255.0761.

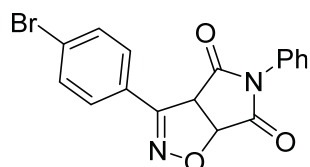

**3-(4-Bromophenyl)-5-phenyl-3a,6a-dihydro-4H-pyrrolo[3,4-d]isoxazole-4,6(5H)-dione (3g):**

Following the general procedure, the reaction mixture of **1f** (98.5 mg, 0.3

mmol), 1-phenyl-1*H*-pyrrole-2,5-dione **2a** (77.9 mg, 0.45 mmol), Cu(NO<sub>3</sub>)<sub>2</sub>·3H<sub>2</sub>O (145.0 mg, 0.6 mmol), KI (49.8 mg, 0.3 mmol) in dioxane (1.5 mL). After 4 h at 80 °C, purification by column chromatography on silica gel (petroleum ether/ethyl acetate) afforded **3g** (89.6 mg, 80%). M.p. 204-206 °C; IR (KBr, cm<sup>-1</sup>): 2923, 1722, 1496, 1496, 1389, 1194, 893, 832, 691, 619; <sup>1</sup>H NMR (CDCl<sub>3</sub>, 500 MHz): δ 7.91 (d, *J* = 6.2 Hz, 2H), 7.59 (d, *J* = 6.9 Hz, 2H), 7.47-7.42 (m, 3H), 7.27-7.26 (m, 2H), 5.68 (d, *J* = 9.4 Hz, 1H), 4.93 (d, *J* = 9.4 Hz, 1H); <sup>13</sup>C NMR (CDCl<sub>3</sub>, 125 MHz): δ 170.6, 169.7, 152.1, 132.2, 130.7, 129.5, 129.3 (two overlapped peaks), 126.1, 125.9, 125.7, 80.6, 54.7; EI-MS *m/z*: 370 [M<sup>+</sup> (<sup>79</sup>Br)], 372 [M<sup>+</sup> (<sup>81</sup>Br)]; HRMS (EI) *m/z*: calcd for C<sub>17</sub>H<sub>11</sub>BrN<sub>2</sub>O<sub>3</sub> [M<sup>+</sup>] 369.9953, found 369.9955.

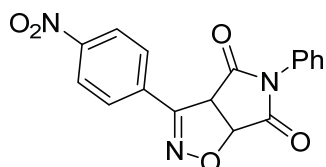

**3-(4-Nitrophenyl)-5-phenyl-3a,6a-dihydro-4*H*-pyrrolo[3,4-*d*]isoxazole-4,6(5*H*)-dione (3h):**<sup>10</sup> Following the general procedure, the reaction mixture of **1g** (88.5 mg, 0.3 mmol), **2a** (77.9 mg, 0.45 mmol), Cu(NO<sub>3</sub>)<sub>2</sub>·3H<sub>2</sub>O (145.0 mg, 0.6 mmol), KI (49.8 mg, 0.3 mmol) in dioxane (1.5 mL). After 4 h at 80 °C, purification by column chromatography on silica gel (petroleum ether/ethyl acetate) afforded **3h** (69.4 mg, 69%). M.p. 251-252 °C; IR (KBr, cm<sup>-1</sup>): 3068, 2956, 1791, 1723, 1518, 1386, 1345, 1205, 910, 856, 744, 688, 624; <sup>1</sup>H NMR (DMSO-*d*<sub>6</sub>, 500 MHz): δ 8.36 (d, *J* = 8.8 Hz, 2H), 8.20 (d, *J* = 8.8 Hz, 2H), 7.50-7.42 (m, 3H), 7.29 (d, *J* = 7.4 Hz, 2H), 5.84 (d, *J* = 9.8 Hz, 1H), 5.49 (d, *J* = 9.8 Hz, 1H); <sup>13</sup>C NMR (DMSO-*d*<sub>6</sub>, 125 MHz): δ 172.2, 171.3, 153.1, 149.0, 133.8, 132.1, 129.7, 129.5, 129.4, 127.5, 124.4, 82.7, 55.4; EI-MS *m/z*: 337 [M<sup>+</sup>]; HRMS (EI) *m/z*: calcd for C<sub>17</sub>H<sub>11</sub>N<sub>3</sub>O<sub>5</sub> [M<sup>+</sup>] 337.0699, found 337.0695.

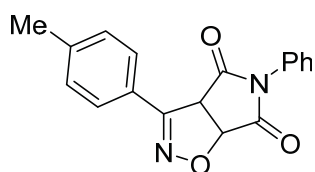

**5-Phenyl-3-(*p*-tolyl)-3a,6a-dihydro-4*H*-pyrrolo[3,4-*d*]isoxazole-4,6(5*H*)-dione (3i):**<sup>10</sup> Following the general procedure, the reaction mixture of **1h** (79.1 mg, 0.3 mmol), **2a** (78.0 mg, 0.45 mmol), Cu(NO<sub>3</sub>)<sub>2</sub>·3H<sub>2</sub>O (145.0 mg, 0.6 mmol), KI (49.8 mg, 0.3 mmol) in dioxane (1.5 mL). After 4 h at 80 °C, purification by column chromatography on silica gel (petroleum ether/ethyl acetate) afforded **3i** (62.2 mg, 68%). M.p. 179-180 °C; IR (KBr, cm<sup>-1</sup>): 3054, 2963, 1724, 1499, 1385, 1193, 892, 854, 695; <sup>1</sup>H NMR (CDCl<sub>3</sub>, 500 MHz): δ 7.93 (d, *J* = 8.2 Hz, 2H), 7.48-7.40 (m, 3H), 7.28 (d, *J* = 7.3 Hz, 4H), 5.65 (d, *J* = 9.7 Hz, 1H), 4.96 (d, *J* = 9.7 Hz, 1H), 2.42 (s, 3H); <sup>13</sup>C NMR (CDCl<sub>3</sub>, 125 MHz): δ 171.1, 170.0, 152.8, 141.8, 130.9, 129.6, 129.3, 129.2, 128.0, 126.2, 123.9, 80.3, 55.0, 21.6; EI-MS *m/z*: 306 [M<sup>+</sup>]; HRMS (EI) *m/z*: calcd for C<sub>18</sub>H<sub>14</sub>N<sub>2</sub>O<sub>3</sub> [M<sup>+</sup>] 306.1004, found 306.1010.

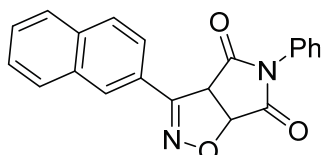

**3-(Naphthalen-2-yl)-5-phenyl-3a,6a-dihydro-4H-pyrrolo[3,4-d]isoxazole-4,6(5H)-dione (3j):** Following the general procedure, the reaction mixture of **1i** (89.9 mg, 0.3 mmol), **2a** (77.9 mg, 0.45 mmol), Cu(NO<sub>3</sub>)<sub>2</sub>·3H<sub>2</sub>O (145.0 mg, 0.6 mmol), KI (49.8 mg, 0.3 mmol) in dioxane (1.5 mL). After 4 h at 80 °C, purification by column chromatography on silica gel (petroleum ether/ethyl acetate) afforded **3j** (73.7 mg, 72%). M.p. 203-204 °C; IR (KBr, cm<sup>-1</sup>): 3059, 1794, 1723, 1594, 1495, 1379, 1193, 899, 745; <sup>1</sup>H NMR (CDCl<sub>3</sub>, 500 MHz): δ 8.53 (s, 1H), 8.08 (d, *J* = 8.7 Hz, 1H), 7.94 (d, *J* = 8.7 Hz, 1H), 7.86 (t, *J* = 9 Hz, 2H), 7.58-7.38 (m, 5H), 7.28 (d, *J* = 7.6 Hz, 2H), 5.71 (d, *J* = 9.7 Hz, 1H), 5.07 (d, *J* = 9.7 Hz, 1H); <sup>13</sup>C NMR (CDCl<sub>3</sub>, 125 MHz): δ 170.8, 170.0, 152.9, 134.4, 132.8, 130.8, 129.6, 129.3, 129.2, 129.0, 128.8, 127.9, 127.8, 126.9, 126.2, 124.2, 123.8, 80.6, 55.0; EI-MS *m/z*: 342 [M<sup>+</sup>]; HRMS (EI) *m/z*: calcd for C<sub>21</sub>H<sub>14</sub>N<sub>2</sub>O<sub>3</sub> [M<sup>+</sup>] 342.1004, found 342.1001.

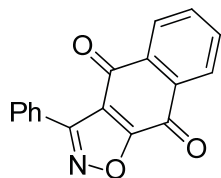

**3-Phenyl-naphtho[2,3-d]isoxazole-4,9-dione (3k):**<sup>11</sup> Following the general procedure, Following the general procedure, the reaction mixture of **1a** (74.9 mg, 0.3 mmol), naphthalene-1,4-dione **2g** (71.1 mg, 0.45 mmol), Cu(NO<sub>3</sub>)<sub>2</sub>·3H<sub>2</sub>O (145.0 mg, 0.6 mmol), KI (49.8 mg, 0.3 mmol) in dioxane (1.5 mL). After 2 h at 80 °C, purification by column chromatography on silica gel (petroleum ether/ethyl acetate) afforded **3k** (55.9 mg, 68%). M.p. 137-138 °C; IR (KBr, cm<sup>-1</sup>): 3072, 1685, 1584, 1433, 1340, 1261, 1204, 1167, 919, 716; <sup>1</sup>H NMR (CDCl<sub>3</sub>, 500 MHz): δ 8.30-8.26 (m, 2H), 8.16 (dd, *J* = 7.6, 1.4 Hz, 2H), 7.89-7.82 (m, 2H), 7.59-7.53 (m, 3H); <sup>13</sup>C NMR (CDCl<sub>3</sub>, 125 MHz): δ 178.7, 173.4, 166.3, 161.0, 135.3, 134.3, 133.8, 131.8, 131.3, 129.4, 128.7, 127.8, 127.3, 126.2, 119.6; EI-MS *m/z*: 275 [M<sup>+</sup>]; HRMS (EI) *m/z*: calcd for C<sub>17</sub>H<sub>9</sub>NO<sub>3</sub> [M<sup>+</sup>] 275.0582, found 275.0587.

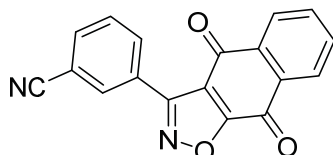

**3-(4,9-Dioxo-4,9-dihydronaphtho[2,3-d]isoxazol-3-yl)benzotrile (3l):** Following the general procedure, the reaction mixture of **1j** (82.3 mg, 0.3 mmol), naphthalene-1,4-dione **2g** (71.1 mg, 0.45 mmol), Cu(NO<sub>3</sub>)<sub>2</sub>·3H<sub>2</sub>O (145.0 mg, 0.6 mmol), KI (49.8 mg, 0.3 mmol) in dioxane (1.5 mL). After 4 h at 80 °C, purification by column chromatography on silica gel (petroleum ether/ethyl acetate) afforded **3l** (68.9 mg, 76%). M.p. 203-205 °C; IR (KBr, cm<sup>-1</sup>): 3080, 2231, 1688, 1581, 1461, 1427, 1336, 1204, 929, 804, 721; <sup>1</sup>H NMR (CDCl<sub>3</sub>, 500 MHz): δ 8.58 (s, 1H), 8.47 (d, *J* = 8.0 Hz, 1H), 8.31-8.28 (m, 2H), 7.95-7.82 (m, 3H), 7.69 (t, *J* = 7.8 Hz, 1H); <sup>13</sup>C

NMR (CDCl<sub>3</sub>, 125 MHz):  $\delta$  178.6, 173.0, 166.6, 159.3, 135.6, 134.7, 134.6, 133.5, 133.4, 133.0, 131.8, 129.7, 127.9, 127.7, 127.5, 119.4, 118.0, 113.3; LC-MS (DART Positive) m/z: 301 [M+H]<sup>+</sup>; HRMS (DART Positive) m/z: calcd for C<sub>18</sub>H<sub>9</sub>N<sub>2</sub>O<sub>3</sub> [M+H]<sup>+</sup> 301.0608, found 301.0605.

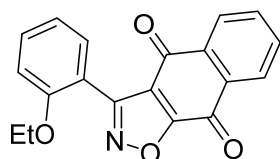

**3-(2-Ethoxyphenyl)naphtho[2,3-d]isoxazole-4,9-dione (3m):** Following the general procedure, the reaction mixture of **1k** (88.1 mg, 0.3 mmol), naphthalene-1,4-dione **2g** (71.1 mg, 0.45 mmol), Cu(NO<sub>3</sub>)<sub>2</sub>·3H<sub>2</sub>O (145.0 mg, 0.6 mmol), KI (49.8 mg, 0.3 mmol) in dioxane (1.5 mL). After 4 h at 80 °C, purification by column chromatography on silica gel (petroleum ether/ethyl acetate) afforded **3m** (63.6 mg, 66%). M.p. 193-195 °C; IR (KBr, cm<sup>-1</sup>): 3071, 2981, 2939, 2891, 1687, 1594, 1453, 1336, 1255, 1199, 1037, 918, 762, 721; <sup>1</sup>H NMR (CDCl<sub>3</sub>, 500 MHz):  $\delta$  8.30-8.28 (m, 1H), 8.21-8.17 (m, 1H), 7.85-7.80 (m, 2H), 7.54-7.50 (m, 2H), 7.09-7.04 (m, 2H), 4.09 (q, *J* = 7.0 Hz, 2H), 1.18 (t, *J* = 7.0 Hz, 3H); <sup>13</sup>C NMR (CDCl<sub>3</sub>, 125 MHz):  $\delta$  178.1, 173.6, 165.0, 158.7, 157.5, 135.1, 134.0, 133.8, 132.4, 132.1, 130.6, 127.4, 127.2, 121.5, 120.4, 115.5, 111.9, 63.9, 14.6; LC-MS (DART Positive) m/z: 320 [M+H]<sup>+</sup>; HRMS (DART Positive) m/z: calcd for C<sub>19</sub>H<sub>14</sub>NO<sub>4</sub> [M+H]<sup>+</sup> 320.0917, found 320.0914.

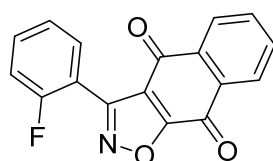

**3-(2-Fluorophenyl)naphtho[2,3-d]isoxazole-4,9-dione (3n):** Following the general procedure, the reaction mixture of **1l** (80.3 mg, 0.3 mmol), **2g** (71.1 mg, 0.45 mmol), Cu(NO<sub>3</sub>)<sub>2</sub>·3H<sub>2</sub>O (145.0 mg, 0.6 mmol), KI (49.8 mg, 0.3 mmol) in dioxane (1.5 mL). After 4 h at 80 °C, purification by column chromatography on silica gel (petroleum ether/ethyl acetate) afforded **3n** (58.6 mg, 67%). M.p. 192-194 °C; IR (KBr, cm<sup>-1</sup>): 3077, 1686, 1584, 1514, 1465, 1336, 1197, 918, 758, 716; <sup>1</sup>H NMR (CDCl<sub>3</sub>, 500 MHz):  $\delta$  8.31-8.29 (m, 1H), 8.23-8.21 (m, 1H), 7.87-7.82 (m, 2H), 7.70 (td, *J* = 7.4, 1.8 Hz, 1H), 7.62-7.57 (m, 1H), 7.35-7.27 (m, 2H); <sup>19</sup>F NMR (CDCl<sub>3</sub>, 470 MHz):  $\delta$  -111.2 (m, Ar-F); <sup>13</sup>C NMR (CDCl<sub>3</sub>, 125 MHz):  $\delta$  178.1, 173.2, 165.5, 160.6 (d, <sup>1</sup>*J*<sub>C-F</sub> = 252.8 Hz), 156.4, 135.3, 134.4, 133.6, 133.1 (d, <sup>3</sup>*J*<sub>C-F</sub> = 8.4 Hz), 132.0, 131.2 (d, <sup>4</sup>*J*<sub>C-F</sub> = 1.2 Hz), 127.5 (d, <sup>3</sup>*J*<sub>C-F</sub> = 9.1 Hz), 124.4 (d, <sup>4</sup>*J*<sub>C-F</sub> = 3.6 Hz), 120.6, 116.2 (d, <sup>2</sup>*J*<sub>C-F</sub> = 21.0 Hz), 114.7 (d, <sup>2</sup>*J*<sub>C-F</sub> = 14.4 Hz); EI-MS m/z: 293 [M<sup>+</sup>]; HRMS (EI) m/z: calcd for C<sub>17</sub>H<sub>8</sub>FNO<sub>3</sub> [M<sup>+</sup>] 293.0488, found 293.0497.

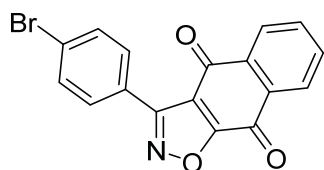

**3-(4-Bromophenyl)naphtho[2,3-*d*]isoxazole-4,9-dione (3o):** Following the general procedure, the reaction mixture of **1f** (98.6 mg, 0.3 mmol), **2g** (71.1 mg, 0.45 mmol), Cu(NO<sub>3</sub>)<sub>2</sub>·3H<sub>2</sub>O (145.0 mg, 0.6 mmol), KI (49.8 mg, 0.3 mmol) in dioxane (1.5 mL). After 4 h at 80 °C, purification by column chromatography on silica gel (petroleum ether/ethyl acetate) afforded **3o** (64.9 mg, 61%). M.p. 178-180 °C; IR (KBr, cm<sup>-1</sup>): 3082, 2924, 1686, 1588, 1443, 1335, 1261, 1195, 1001, 911, 821, 721; <sup>1</sup>H NMR (DMSO-*d*<sub>6</sub>, 500 MHz): δ 8.19-8.15 (m, 2H), 8.04 (d, *J* = 8.5 Hz, 2H), 7.98-7.94 (m, 2H), 7.83 (d, *J* = 8.5 Hz, 2H); <sup>13</sup>C NMR (DMSO-*d*<sub>6</sub>, 500 MHz): δ 179.1, 173.6, 167.1, 159.9, 135.8, 135.0, 134.0, 132.3, 131.5, 127.5, 127.1, 125.8, 125.5, 119.4; EI-MS *m/z*: 352 [M<sup>+</sup> (<sup>79</sup>Br)], 353 [M<sup>+</sup> (<sup>81</sup>Br)]; HRMS (EI) *m/z*: calcd for C<sub>17</sub>H<sub>8</sub>BrNO<sub>3</sub> [M<sup>+</sup>] 352.9688, found 352.9685.

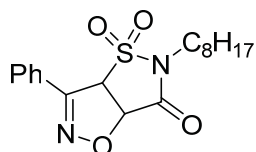

**5-Octyl-3-phenyl-3a,6a-dihydroisothiazolo[5,4-*d*]isoxazol-6(5*H*)-one 4,4-dioxide (3p):** Following the general procedure, the reaction mixture of **1a** (74.8 mg, 0.3 mmol), **2h** (110.4 mg, 0.45 mmol), Cu(NO<sub>3</sub>)<sub>2</sub>·3H<sub>2</sub>O (145.0 mg, 0.6 mmol), KI (49.8 mg, 0.3 mmol) in dioxane (1.5 mL). After 4 h at 80 °C, purification by column chromatography on silica gel (petroleum ether/ethyl acetate) afforded **3p** (55.2 mg, 50%). M.p. 81-83 °C; IR (KBr, cm<sup>-1</sup>): 2924, 2856, 1738, 1458, 1348, 1156, 1077, 917, 772, 689, 554; <sup>1</sup>H NMR (CDCl<sub>3</sub>, 500 MHz): δ 7.78-7.76 (m, 2H), 7.54-7.46 (m, 3H), 5.72 (d, *J* = 10.4 Hz, 1H), 5.52 (d, *J* = 10.4 Hz, 1H), 3.68-3.58 (m, 2H), 1.77-1.71 (m, 2H), 1.31-1.25 (m, 10H), 0.87 (t, *J* = 6.9 Hz, 3H); <sup>13</sup>C NMR (CDCl<sub>3</sub>, 125 MHz): δ 160.1, 151.1, 131.7, 129.3, 127.3, 126.5, 82.7, 69.6, 41.2, 31.7, 29.0, 28.9, 28.0, 26.6, 22.6, 14.1; EI-MS *m/z*: 364 [M<sup>+</sup>]; HRMS (EI) *m/z*: calcd for C<sub>18</sub>H<sub>24</sub>N<sub>2</sub>O<sub>4</sub>S [M<sup>+</sup>] 364.1457, found 364.1458.

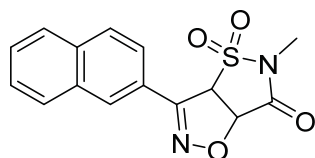

**5-Methyl-3-(naphthalen-2-yl)-5,6a-dihydroisothiazolo[5,4-*d*]isoxazol-6(3a*H*)-one 4,4-dioxide (3q):** Following the general procedure, the reaction mixture of **1i** (89.8 mg, 0.3 mmol), **2i** (66.4 mg, 0.45 mmol), Cu(NO<sub>3</sub>)<sub>2</sub>·3H<sub>2</sub>O (145.0 mg, 0.6 mmol), KI (49.8 mg, 0.3 mmol) in dioxane (1.5 mL). After 4 h at 80 °C, purification by column chromatography on silica gel (petroleum ether/ethyl acetate) afforded **3q** (46.3 mg, 49%). M.p. 198-200 °C; IR (KBr, cm<sup>-1</sup>): 2952, 2923, 1734, 1462, 1340, 1218, 1149, 917, 804, 745, 612; <sup>1</sup>H NMR (CDCl<sub>3</sub>, 500 MHz): δ 8.07 (d, *J* = 1.0 Hz, 1H), 7.98-7.86 (m, 4H), 7.62-7.56 (m, 2H), 5.80 (d, *J* = 10.4 Hz, 1H), 5.68 (d, *J* = 10.4 Hz, 1H), 3.18 (s, 3H); <sup>13</sup>C NMR (CDCl<sub>3</sub>, 125 MHz): δ 159.9, 151.2, 134.6, 132.8, 129.4, 128.9, 128.2 (two overlapped peaks), 128.0, 127.3, 124.0, 123.2, 83.1, 69.6, 25.0; HRMS (ESI) *m/z* calcd for C<sub>15</sub>H<sub>13</sub>N<sub>2</sub>O<sub>4</sub>S [M<sup>+</sup>H] 317.0596, found 317.0582.

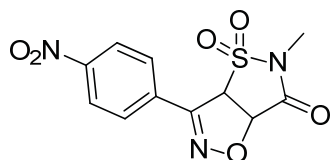

**5-Methyl-3-(4-nitrophenyl)-5,6a-dihydroisothiazolo[5,4-d]isoxazol-6(3aH)-one 4,4-dioxide (3r):** Following the general procedure, the reaction mixture of **1g** (88.5 mg, 0.3 mmol), **2i** (66.3 mg, 0.45 mmol), Cu(NO<sub>3</sub>)<sub>2</sub>·3H<sub>2</sub>O (145.0 mg, 0.6 mmol), KI (49.8 mg, 0.3 mmol) in dioxane (1.5 mL). After 4 h at 80 °C, purification by column chromatography on silica gel (petroleum ether/ethyl acetate) afforded **3r** (19.7 mg, 21%). M.p. 260-261 °C; IR (KBr, cm<sup>-1</sup>): 3086, 2963, 1720, 1520, 1419, 1346, 1263, 1153, 1099, 1025, 925, 803, 740, 690; <sup>1</sup>H NMR (DMSO-*d*<sub>6</sub>, 500 MHz): δ 8.40 (d, *J* = 8.9 Hz, 2H), 8.04 (d, *J* = 8.9 Hz, 2H), 6.60 (d, *J* = 10.3 Hz, 1H), 6.12 (d, *J* = 10.3 Hz, 1H), 3.04 (s, 3H); <sup>13</sup>C NMR (DMSO-*d*<sub>6</sub>, 125 MHz): δ 161.1, 151.6, 149.3, 133.3, 128.9, 124.9, 85.2, 69.3, 24.8; EI-MS *m/z*: 312 [M+H]<sup>+</sup>; HRMS (EI) *m/z*: calcd for C<sub>11</sub>H<sub>10</sub>N<sub>3</sub>O<sub>6</sub>S [M+H]<sup>+</sup> 312.0285, found 312.0283.

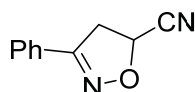

**3-Phenyl-4,5-dihydroisoxazole-5-carbonitrile (3s):**<sup>12</sup> Following the general procedure, the reaction mixture of **1a** (74.7 mg, 0.3 mmol), acrylonitrile (60.0 μL, 0.9 mmol), Cu(NO<sub>3</sub>)<sub>2</sub>·3H<sub>2</sub>O (290.0 mg, 1.2 mmol), KI (99.6 mg, 0.6 mmol) in CH<sub>3</sub>CN (1.5 mL). After 4.5 h at 50 °C, purification by column chromatography on silica gel (petroleum ether/ethyl acetate) afforded **3s** (29.1 mg, 56%). M.p. 63-66 °C; IR (KBr, cm<sup>-1</sup>): 2990, 2429, 1564, 1444, 1352, 925, 870, 759, 685; <sup>1</sup>H NMR (CDCl<sub>3</sub>, 500 MHz): δ 7.68-7.66 (m, 2H), 7.51-7.43 (m, 3H), 5.38 (dd, *J* = 10.5, 6.3 Hz, 1H), 3.81-3.71 (m, 2H); <sup>13</sup>C NMR (CDCl<sub>3</sub>, 125 MHz): δ 156.3, 131.3, 129.1, 127.4, 127.1, 117.1, 66.6, 41.2; HRMS (ESI) *m/z* calcd for C<sub>10</sub>H<sub>9</sub>N<sub>2</sub>O [M<sup>+</sup>H]<sup>+</sup> 173.0715, found 173.0721.

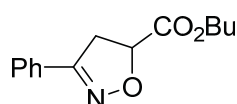

**Butyl 3-phenyl-4,5-dihydroisoxazole-5-carboxylate (3t):** Following the general procedure, the reaction mixture of **1a** (74.7 mg, 0.3 mmol), *n*-butyl acrylate (66.0 μL, 0.45 mmol), Cu(NO<sub>3</sub>)<sub>2</sub>·3H<sub>2</sub>O (145.0 mg, 0.6 mmol), KI (49.7 mg, 0.3 mmol) in CH<sub>3</sub>CN (1.5 mL). After 4 h at 80 °C, purification by column chromatography on silica gel (petroleum ether/ethyl acetate) afforded **3t** (42.9 mg, 58%) as a yellow liquid; IR (KBr, cm<sup>-1</sup>): 3061, 2961, 2873, 1742, 1454, 1352, 1205, 892, 760; <sup>1</sup>H NMR (CDCl<sub>3</sub>, 500 MHz): δ 7.68-7.66 (m, 2H), 7.43-7.39 (m, 3H), 5.16 (dd, *J* = 10.5, 7.8, Hz 1H), 4.20 (t, *J* = 6.8 Hz, 1H), 3.64-3.62 (m, 2H), 1.70-1.63 (m, 2H), 1.43-1.35 (m, 2H), 0.93 (t, *J* = 7.4 Hz, 3H); <sup>13</sup>C NMR (CDCl<sub>3</sub>, 125 MHz): δ 170.3, 156.0, 130.6, 128.8, 128.6, 126.9, 78.1, 65.9, 38.9, 30.5, 19.0, 13.7; EI-MS *m/z*: 247 [M<sup>+</sup>]; HRMS (EI) *m/z*: calcd for C<sub>14</sub>H<sub>17</sub>NO<sub>3</sub> [M<sup>+</sup>] 247.1208, found 247.1215.

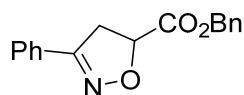

**Benzyl 3-phenyl-4,5-dihydroisoxazole-5-carboxylate (3u):**<sup>13</sup> Following the general procedure, the reaction mixture of **1a** (74.7 mg, 0.3 mmol), benzyl acrylate (68  $\mu$ L, 0.45 mmol),  $\text{Cu}(\text{NO}_3)_2 \cdot 3\text{H}_2\text{O}$  (145.0 mg, 0.6 mmol), KI (49.7 mg, 0.3 mmol) in  $\text{CH}_3\text{CN}$  (1.5 mL). After 4.5 h at 80  $^\circ\text{C}$ , purification by column chromatography on silica gel (petroleum ether/ethyl acetate) afforded **3u** (50.7 mg, 60%). M.p. 53-55  $^\circ\text{C}$ ; IR (KBr,  $\text{cm}^{-1}$ ): 3063, 2928, 1749, 1450, 1347, 1197, 1018, 886, 758, 696;  $^1\text{H}$  NMR ( $\text{CDCl}_3$ , 500 MHz):  $\delta$  7.67 (dd,  $J = 7.6, 1.6$  Hz, 2H), 7.45-7.33 (m, 8H), 5.27-5.19 (m, 3H), 3.69-3.59 (m, 2H);  $^{13}\text{C}$  NMR ( $\text{CDCl}_3$ , 125 MHz):  $\delta$  170.0, 156.0, 135.1, 130.6, 128.8, 128.7, 128.6, 128.5, 128.4, 127.0, 78.1, 67.6, 38.9; EI-MS  $m/z$ : 281 [ $\text{M}^+$ ]; HRMS (EI)  $m/z$ : calcd for  $\text{C}_{17}\text{H}_{15}\text{NO}_3$  [ $\text{M}^+$ ] 281.1052, found 281.1053.

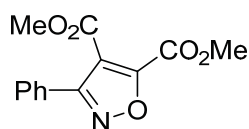

**Dimethyl 3-phenylisoxazole-4,5-dicarboxylate (3v):**<sup>14</sup> Following the general procedure, the reaction mixture of **1a** (74.7 mg, 0.3 mmol), dimethyl acetylenedicarboxylate (54.0  $\mu$ L, 0.45 mmol),  $\text{Cu}(\text{NO}_3)_2 \cdot 3\text{H}_2\text{O}$  (145.0 mg, 0.6 mmol), KI (49.7 mg, 0.3 mmol) in  $\text{CH}_3\text{CN}$  (1.5 mL). After 4 h at 80  $^\circ\text{C}$ , purification by column chromatography on silica gel (petroleum ether/ethyl acetate) afforded **3v** (43.4 mg, 55%). M.p. 62-64  $^\circ\text{C}$ ; IR (KBr,  $\text{cm}^{-1}$ ): 3457, 2955, 2923, 1716, 1429, 1222, 1066, 918, 794, 686;  $^1\text{H}$  NMR ( $\text{CDCl}_3$ , 500 MHz):  $\delta$  7.70-7.68 (m, 2H), 7.53-7.46 (m, 3H), 4.02 (s, 3H), 3.90 (s, 3H);  $^{13}\text{C}$  NMR ( $\text{CDCl}_3$ , 125 MHz):  $\delta$  161.8, 161.3, 159.4, 156.5, 130.7, 128.9, 128.2, 126.9, 116.1, 100.0, 53.4, 53.2; EI-MS  $m/z$ : 261 [ $\text{M}^+$ ]; HRMS (EI)  $m/z$ : calcd for  $\text{C}_{13}\text{H}_{11}\text{NO}_5$  [ $\text{M}^+$ ] 261.0637, found 261.0633.

#### 4. X-Ray Crystallographic Analysis for Compound **3r**

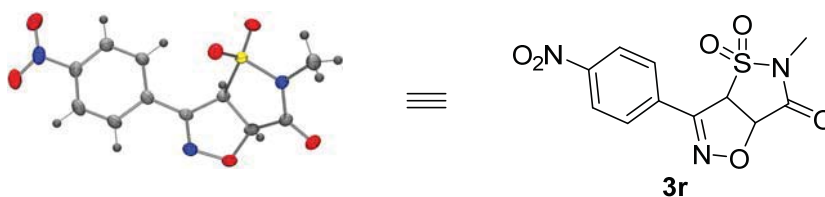

Crystallographic data for **3r**:  $\text{C}_{11}\text{H}_9\text{N}_3\text{O}_6\text{S}$ ,  $M = 311.27$ , orthorhombic,  $\text{Pbca}$  (No. 61),  $a = 6.495$  (3)  $\text{\AA}$ ,  $b = 17.713$  (8)  $\text{\AA}$ ,  $c = 21.586$  (10)  $\text{\AA}$ ,  $V = 2483$  (2)  $\text{\AA}^3$ ,  $Z = 8$ , Crystal size:  $0.25 \times 0.20 \times 0.15$  mm,  $T = 293$  K,  $\rho_{\text{calcd}} = 1.665$   $\text{g} \cdot \text{cm}^{-3}$ ,  $R_1 = 0.0374$  ( $I > 4\sigma(I)$ ),  $wR_2 = 0.111$  (all data),  $\text{GOF} = 1.031$ , reflections collected/unique: 14604 / 2926 ( $R_{\text{int}} = 0.0289$ ), Data: 2306, restraints: 0, parameters: 198. CCDC 1884631 (**3r**) contains the supplementary crystallographic data for this paper. The data can be obtained free of charge from The Cambridge Crystallographic Data Centre via [www.ccdc.cam.ac.uk/data\\_request/cif](http://www.ccdc.cam.ac.uk/data_request/cif).



## 5. Mechanistic Studies

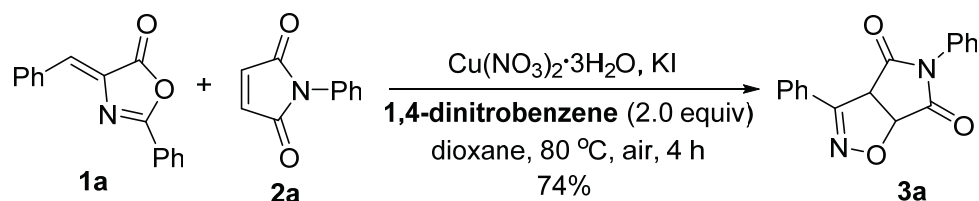

To a test tube were added **1a** (74.7 mg, 0.3 mmol), **2a** (77.9 mg, 0.45 mmol),  $\text{Cu(NO}_3)_2 \cdot 3\text{H}_2\text{O}$  (145.0 mg, 0.6 mmol), KI (49.8, 0.3 mmol) and 1,4-dinitrobenzene (101.0 mg, 0.6 mmol) in dioxane (1.5 mL). The mixture was stirred at 80 °C for 4 h under an air atmosphere. Upon completion of the reaction, the solution was cooled down to room temperature and the solvent was removed under reduced pressure. The residue was purification by column chromatography on silica gel (petroleum ether/ethyl acetate) afforded **3a** (65 mg, 74%).

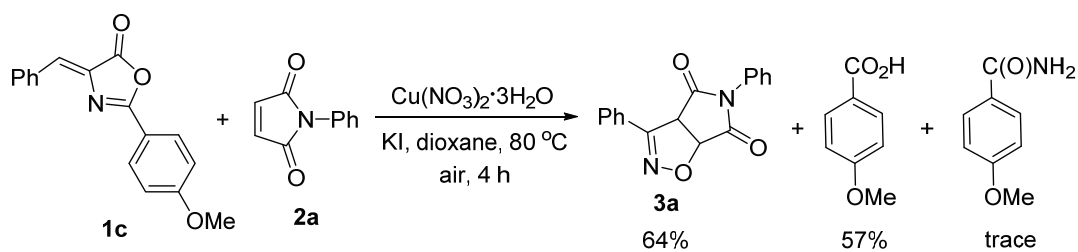

To a test tube were added **1c** (83.7 mg, 0.3 mmol), **2a** (77.9 mg, 0.45 mmol),  $\text{Cu(NO}_3)_2 \cdot 3\text{H}_2\text{O}$  (145.0 mg, 0.6 mmol) and KI (49.8, 0.3 mmol) in dioxane (1.5 mL). The mixture was stirred at 80 °C for 4 h under an air atmosphere. Upon completion of the reaction, the solution was cooled down to room temperature and the solvent was removed under reduced pressure. The residue was purification by column chromatography on silica gel (petroleum ether/ethyl acetate) afforded **3a** (56.3 mg, 64%) and 4-methoxybenzoic acid (26.0 mg, 57%) as a white solid. No observable 4-methoxybenzamide was isolated.

Characterization of 4-methoxybenzoic acid:<sup>15</sup>  $^1\text{H}$  NMR ( $\text{CDCl}_3$ , 500 MHz):  $\delta$  8.09 (d,  $J = 8.9$  Hz, 2H), 6.98 (d,  $J = 8.9$  Hz, 2H), 3.91 (s, 3H).

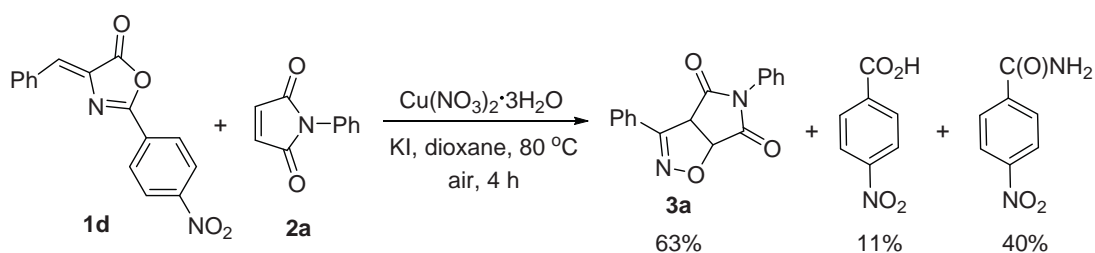

To a test tube were added **1d** (88.3 mg, 0.3 mmol), **2a** (77.9 mg, 0.45 mmol),  $\text{Cu(NO}_3)_2 \cdot 3\text{H}_2\text{O}$  (145.0 mg, 0.6 mmol) and KI (49.8, 0.3 mmol) in dioxane (1.5 mL). The mixture was stirred at 80 °C for 4 h under an air atmosphere. Upon completion of

the reaction, the solution was cooled down to room temperature and the solvent was removed under reduced pressure. The residue was purification by column chromatography on silica gel (petroleum ether/ethyl acetate) afforded **3a** (55.0 mg, 63%), 4-nitrobenzamide (20.0 mg, 40%) and 4-nitrobenzoic acid (5.6 mg, 11%).

Characterization of 4-nitrobenzamide:<sup>16</sup> <sup>1</sup>H NMR (DMSO-*d*<sub>6</sub>, 500 MHz): δ 8.30-8.28 (m, 3H), 8.09 (d, *J* = 8.7 Hz, 2H), 7.73 (s, 1H).

Characterization of 4-nitrobenzoic acid:<sup>17</sup> <sup>1</sup>H NMR (DMSO-*d*<sub>6</sub>, 500 MHz): δ 13.65 (s, 1H), 8.32 (d, *J* = 8.7 Hz, 2H), 8.17 (d, *J* = 8.7 Hz, 2H).

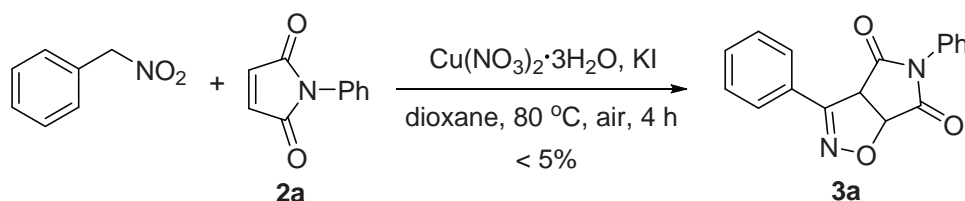

To a test tube were added (nitromethyl)benzene<sup>18</sup> (41 mg, 0.3 mmol), **2a** (77.9 mg, 0.45 mmol), Cu(NO<sub>3</sub>)<sub>2</sub>·3H<sub>2</sub>O (145.0 mg, 0.6 mmol) and KI (49.8, 0.3 mmol) in dioxane (1.5 mL). The mixture was stirred at 80 °C for 4 h under an air atmosphere. Upon completion of the reaction, the solution was cooled down to room temperature and the solvent was removed under reduced pressure. The residue was purification by column chromatography on silica gel (petroleum ether/ethyl acetate) afforded **3a** (<math>< 5\%</math>) and (nitromethyl)benzene (with 95% recovery).

## 6. Reference

- [1] M. Blanco-Lomas, P. J. Campos and D. Sampedro, *Org. Lett.*, 2012, **14**, 4334.
- [2] M. A. Almaraz-Girón and A. Vázquez, *Tetrahedron Lett.*, 2017, **58**, 785.
- [3] C. A. B. Rodrigues, I. F. A. Mariz, M. S. E. Maçôas, C. A. M. Afonso and J. M. G. Martinho, *Dyes Pigments*, 2013, **99**, 642.
- [4] R. Glaser and S. Geresh, *Tetrahedron*, 1979, **35**, 2381.
- [5] B. M. Trost, P. J. Morris and S. J. Sprague, *J. Am. Chem. Soc.*, 2012, **134**, 17823.
- [6] P. Richter, H. G. Kazmirowski, G. Wagner and C. Garbe, *Pharmazie*, 1973, **28**, 585.
- [7] E. L. Bennett and C. Nieman, *J. Am. Chem. Soc.*, 1950, **72**, 1806.
- [8] T. Shimizu, Y. Hayashi and K. Teramura, *Bull. Chem. Soc. Jpn.*, 1984, **57**, 2531.
- [9] A. Yoshimura, K. C. Nguyen, G. T. Rohde, A. Saito, M. S. Yusubov and V. V. Zhdankin, *Adv. Synth. Catal.*, 2016, **358**, 2340.
- [10] V. Kumar and M. P. Kaushik, *Tetrahedron Lett.*, 2006, **47**, 1457.
- [11] A. Bargiotti, L. Musso, S. Dallavalle, L. Merlini, G. Gallo, A. Ciacci, G. Giannini, W. Cabri, S. Penco, L. Vesci, M. Castorina, F. M. Milazzo, M. L. Cervoni, M. Barbarino, C. Pisano, C. Giommarelli, V. Zuco, M. De Cesare and F. Zunino, *Eur. J. Med. Chem.*, 2012, **53**, 64.
- [12] T. D. Svejstrup, W. Zawodny, J. J. Douglas, D. Bidgeli, N. S. Sheikh and D. Leonori, *Chem. Commun.*, 2016, **52**, 12302.

- [13] C. Matt, A. Gissot, A. Wagner and C. Mioskowski, *Tetrahedron Lett.*, 2000, **41**, 1191.
- [14] A. Singhal, S. K. R. Parumala, A. Sharma and R. K. Peddinti, *Tetrahedron Lett.*, 2016, **57**, 719.
- [15] X. Wang, C. Wang, Y. Liu and J. Xiao, *Green Chem.*, 2016, **18**, 4605.
- [16] D. D. S. Sharley and J. M. J. Williams, *Tetrahedron Lett.*, 2017, **58**, 4090.
- [17] S. Wu, H. Ma and Z. Lei, *Tetrahedron*, 2010, **66**, 8641.
- [18] D. S. Bose and G. Vanajatha, *Synth. Commun.*, 1998, **28**, 4531.

8.2087  
8.2047  
8.2008  
8.1956  
8.1923  
8.1891  
8.1837  
8.1812  
8.1783  
8.1711  
8.1670  
8.1641  
8.5941  
7.5108  
7.4626  
7.4504  
7.2602  
7.2336

8.2047  
8.1956  
8.1923  
8.1891  
8.1837  
8.1812  
8.1783  
8.1711  
8.1670  
8.1641

7.6253  
7.6228  
7.6202  
7.6121  
7.6080  
7.6041  
7.5957  
7.5931  
7.5905  
7.5411  
7.4978  
7.4855  
7.4592  
7.4487  
7.4348  
7.2602  
7.2336

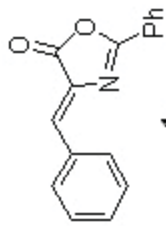

CDCl<sub>3</sub>, 500 MHz

S20

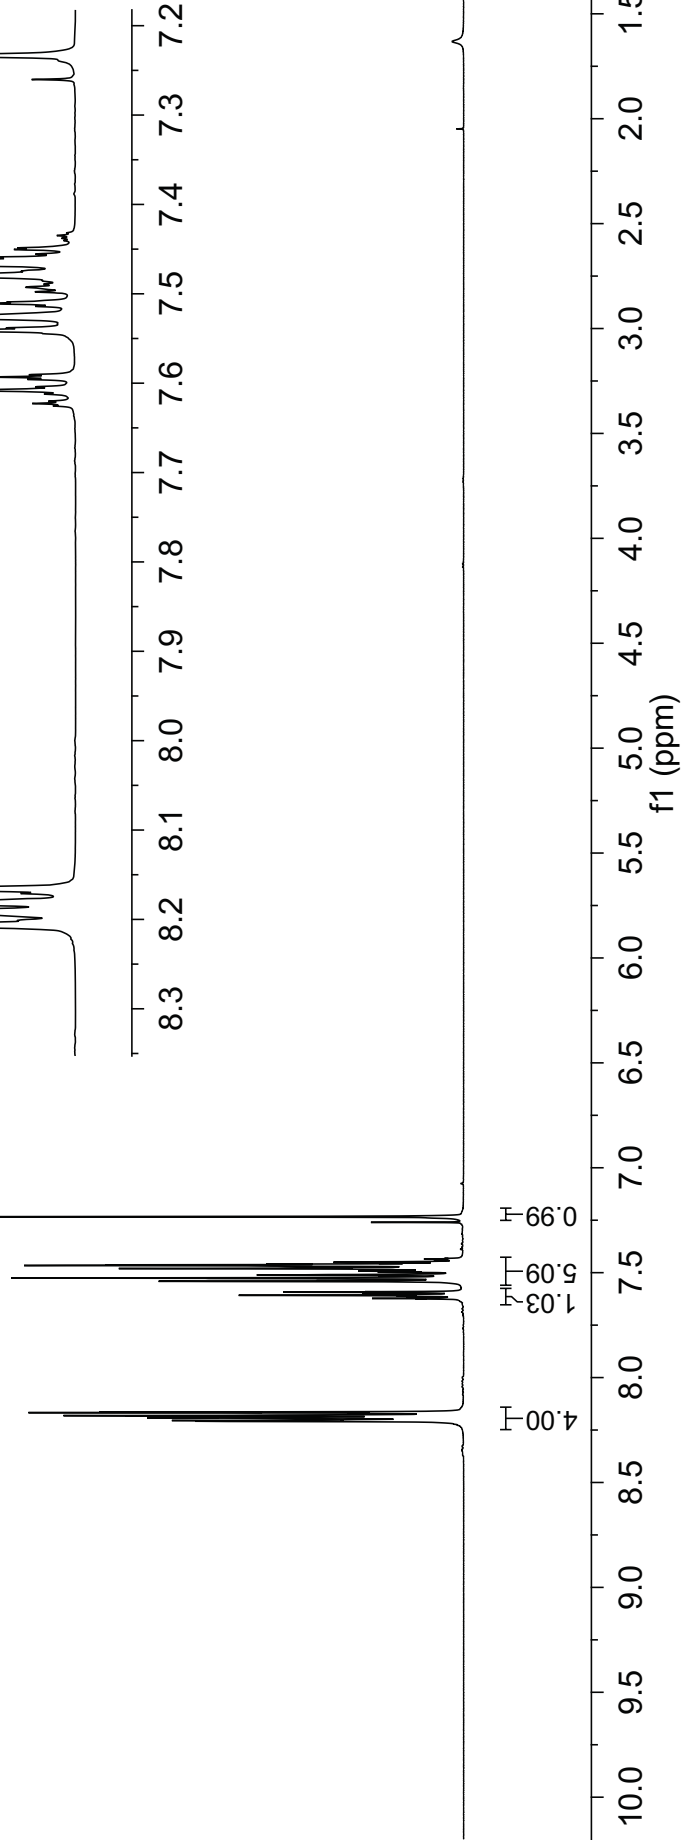

167.63  
163.54

133.53  
133.36  
133.27  
132.48  
131.78  
131.22  
128.95  
128.92  
128.39  
125.59

77.33  
77.08  
76.83

133.53  
133.36  
133.27  
132.48  
131.78  
131.22  
128.95  
128.92  
128.39  
125.59

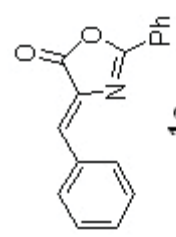

CDCl<sub>3</sub>, 125 MHz

S21

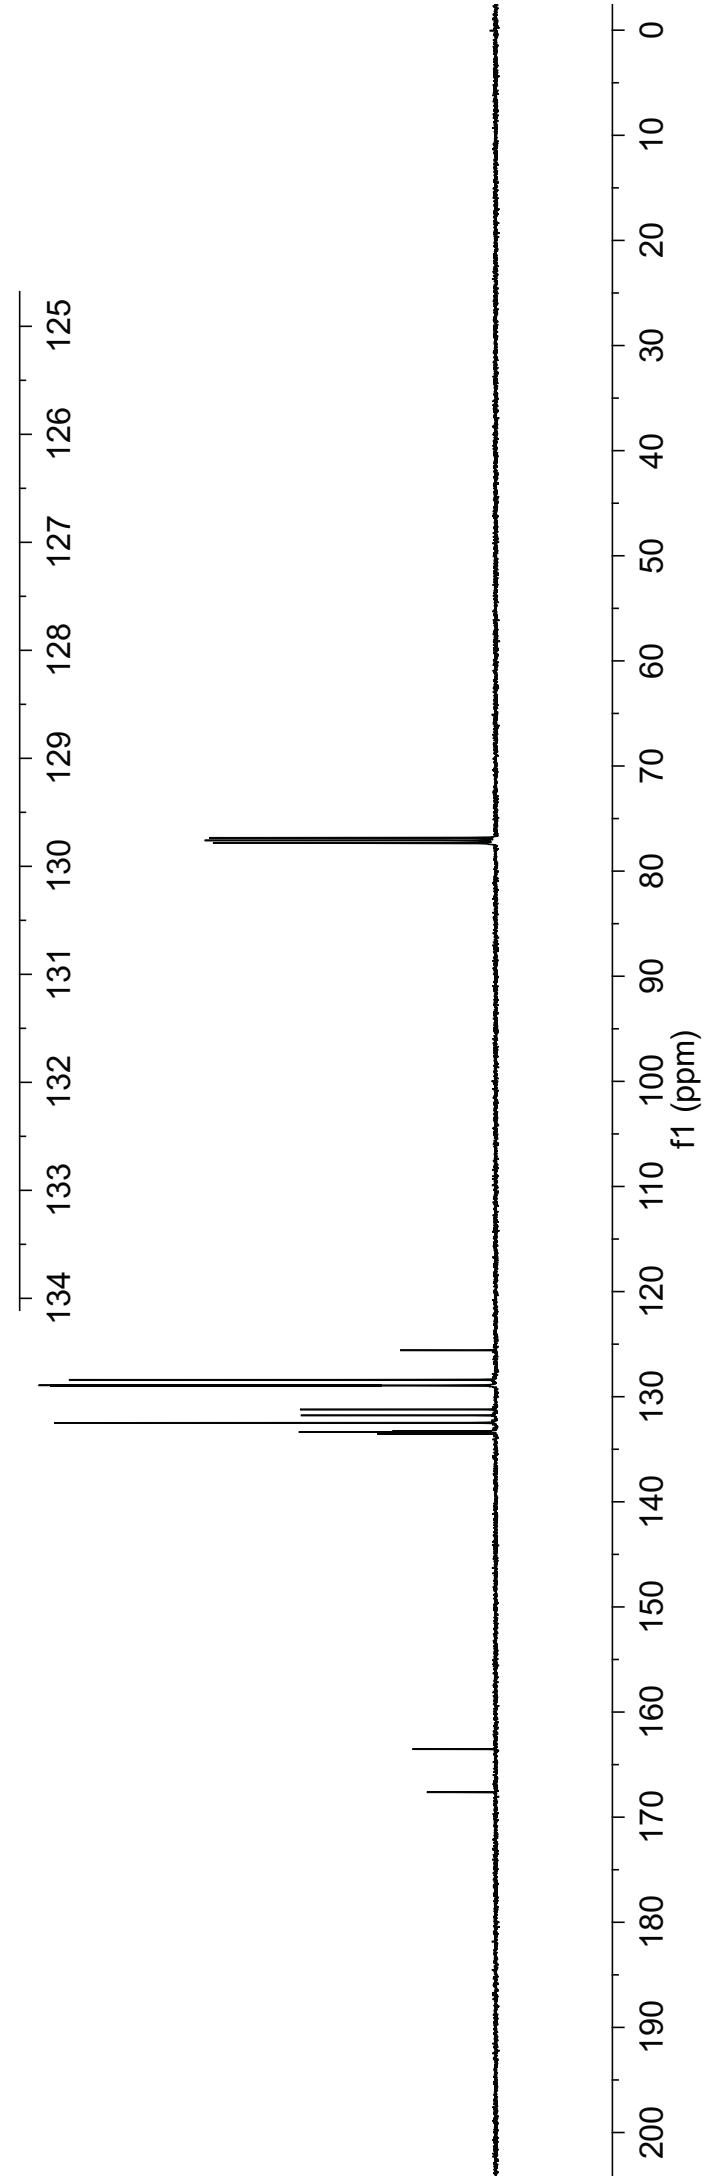

2.4034

7.1424  
7.2604  
7.4312  
7.4351  
7.4454

8.0638  
8.0678  
8.0771  
8.0832

7.1424  
7.2604  
7.4312  
7.4351  
7.4454  
8.0638  
8.0678  
8.0771  
8.0832

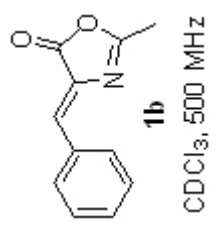

3.041

1.001

3.031

2.001

f1 (ppm)

10.0 9.5 9.0 8.5 8.0 7.5 7.0 6.5 6.0 5.5 5.0 4.5 4.0 3.5 3.0 2.5 2.0 1.5 1.0 0.5 0.0

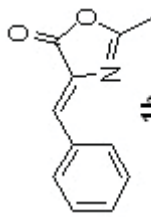

CDCl<sub>3</sub>, 125 MHz

167.81  
166.12

133.14  
132.58  
132.17  
131.48  
131.13  
128.88

77.30  
77.05  
76.80

15.69

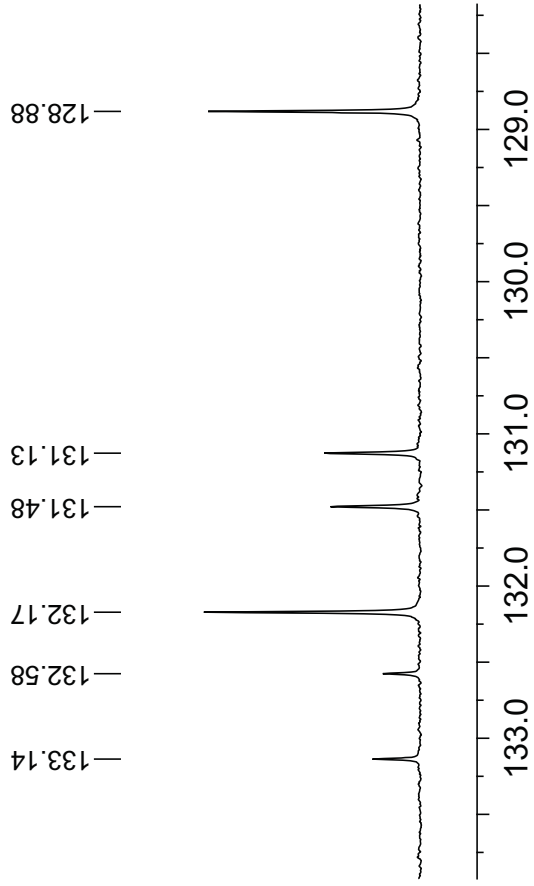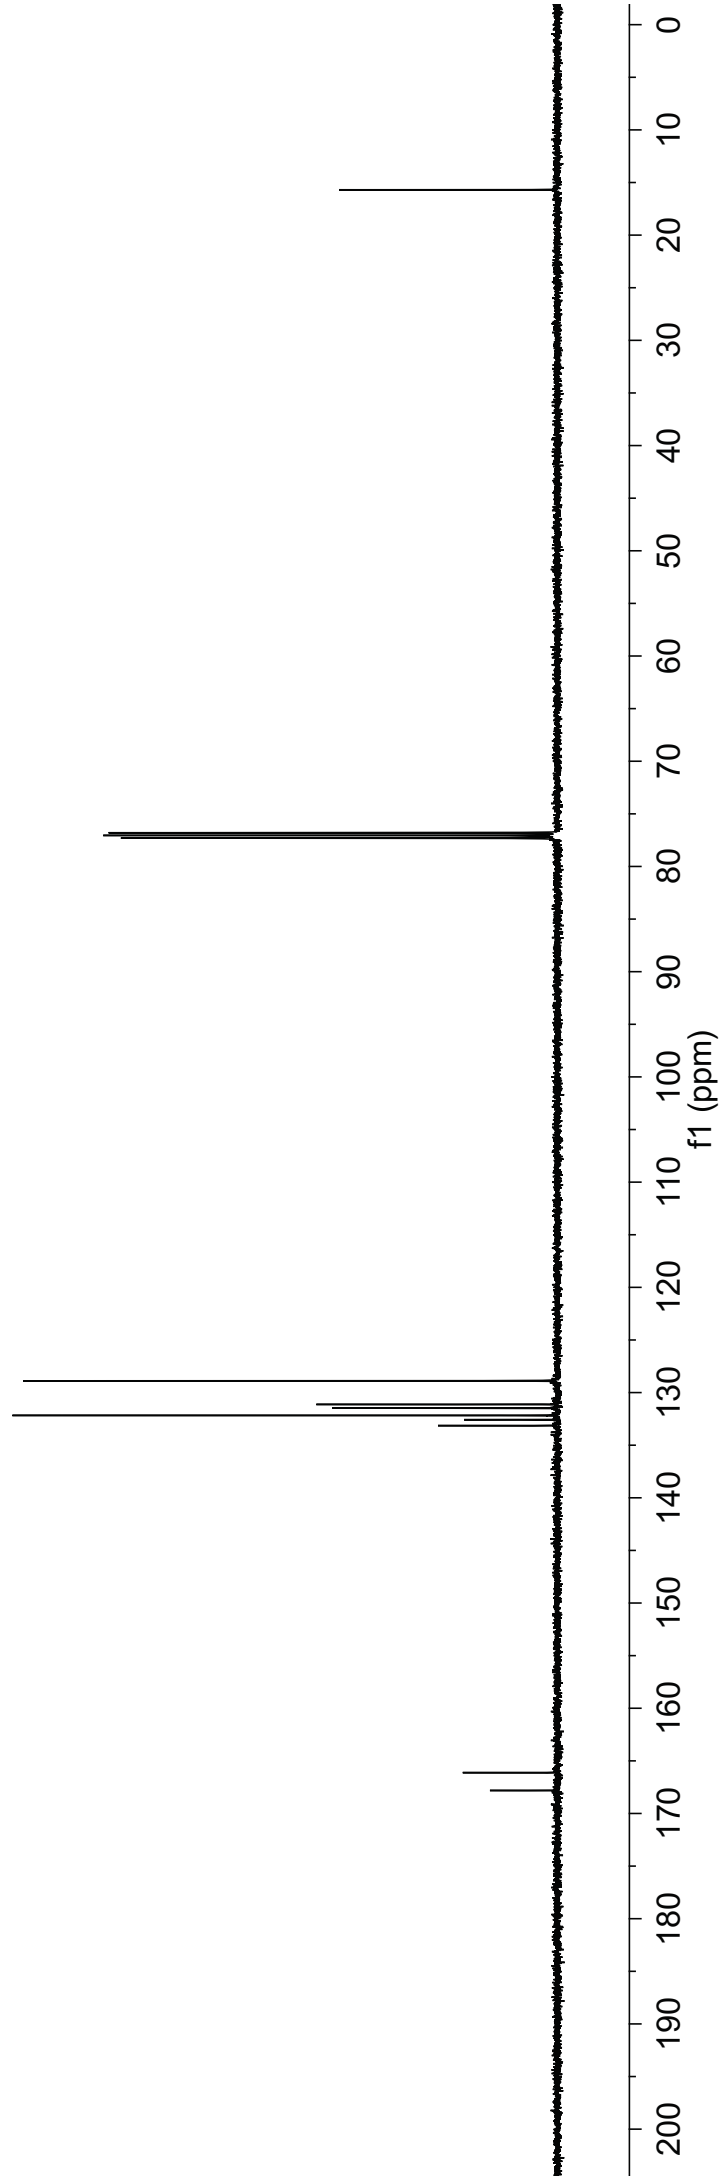

—0.0023

—1.5747

—3.9122

7.0213

7.0390

7.1910

7.4213

7.4382

7.4625

8.1354

8.1531

8.1923

8.2067

7.0390

7.0213

7.1910

7.2603

7.4213

7.4230

7.4382

7.4552

7.4625

7.4779

7.4949

8.1354

8.1531

8.1923

8.2067

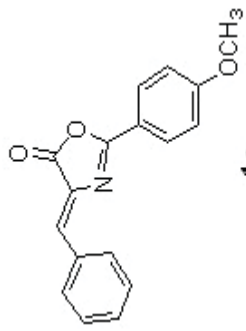

CDCl<sub>3</sub>, 500 MHz

8.1 7.9 7.7 7.5 7.3 7.1

3.02 H

2.00 H

1.01 H

3.03 H

1.98 H

2.00 H

f1 (ppm)



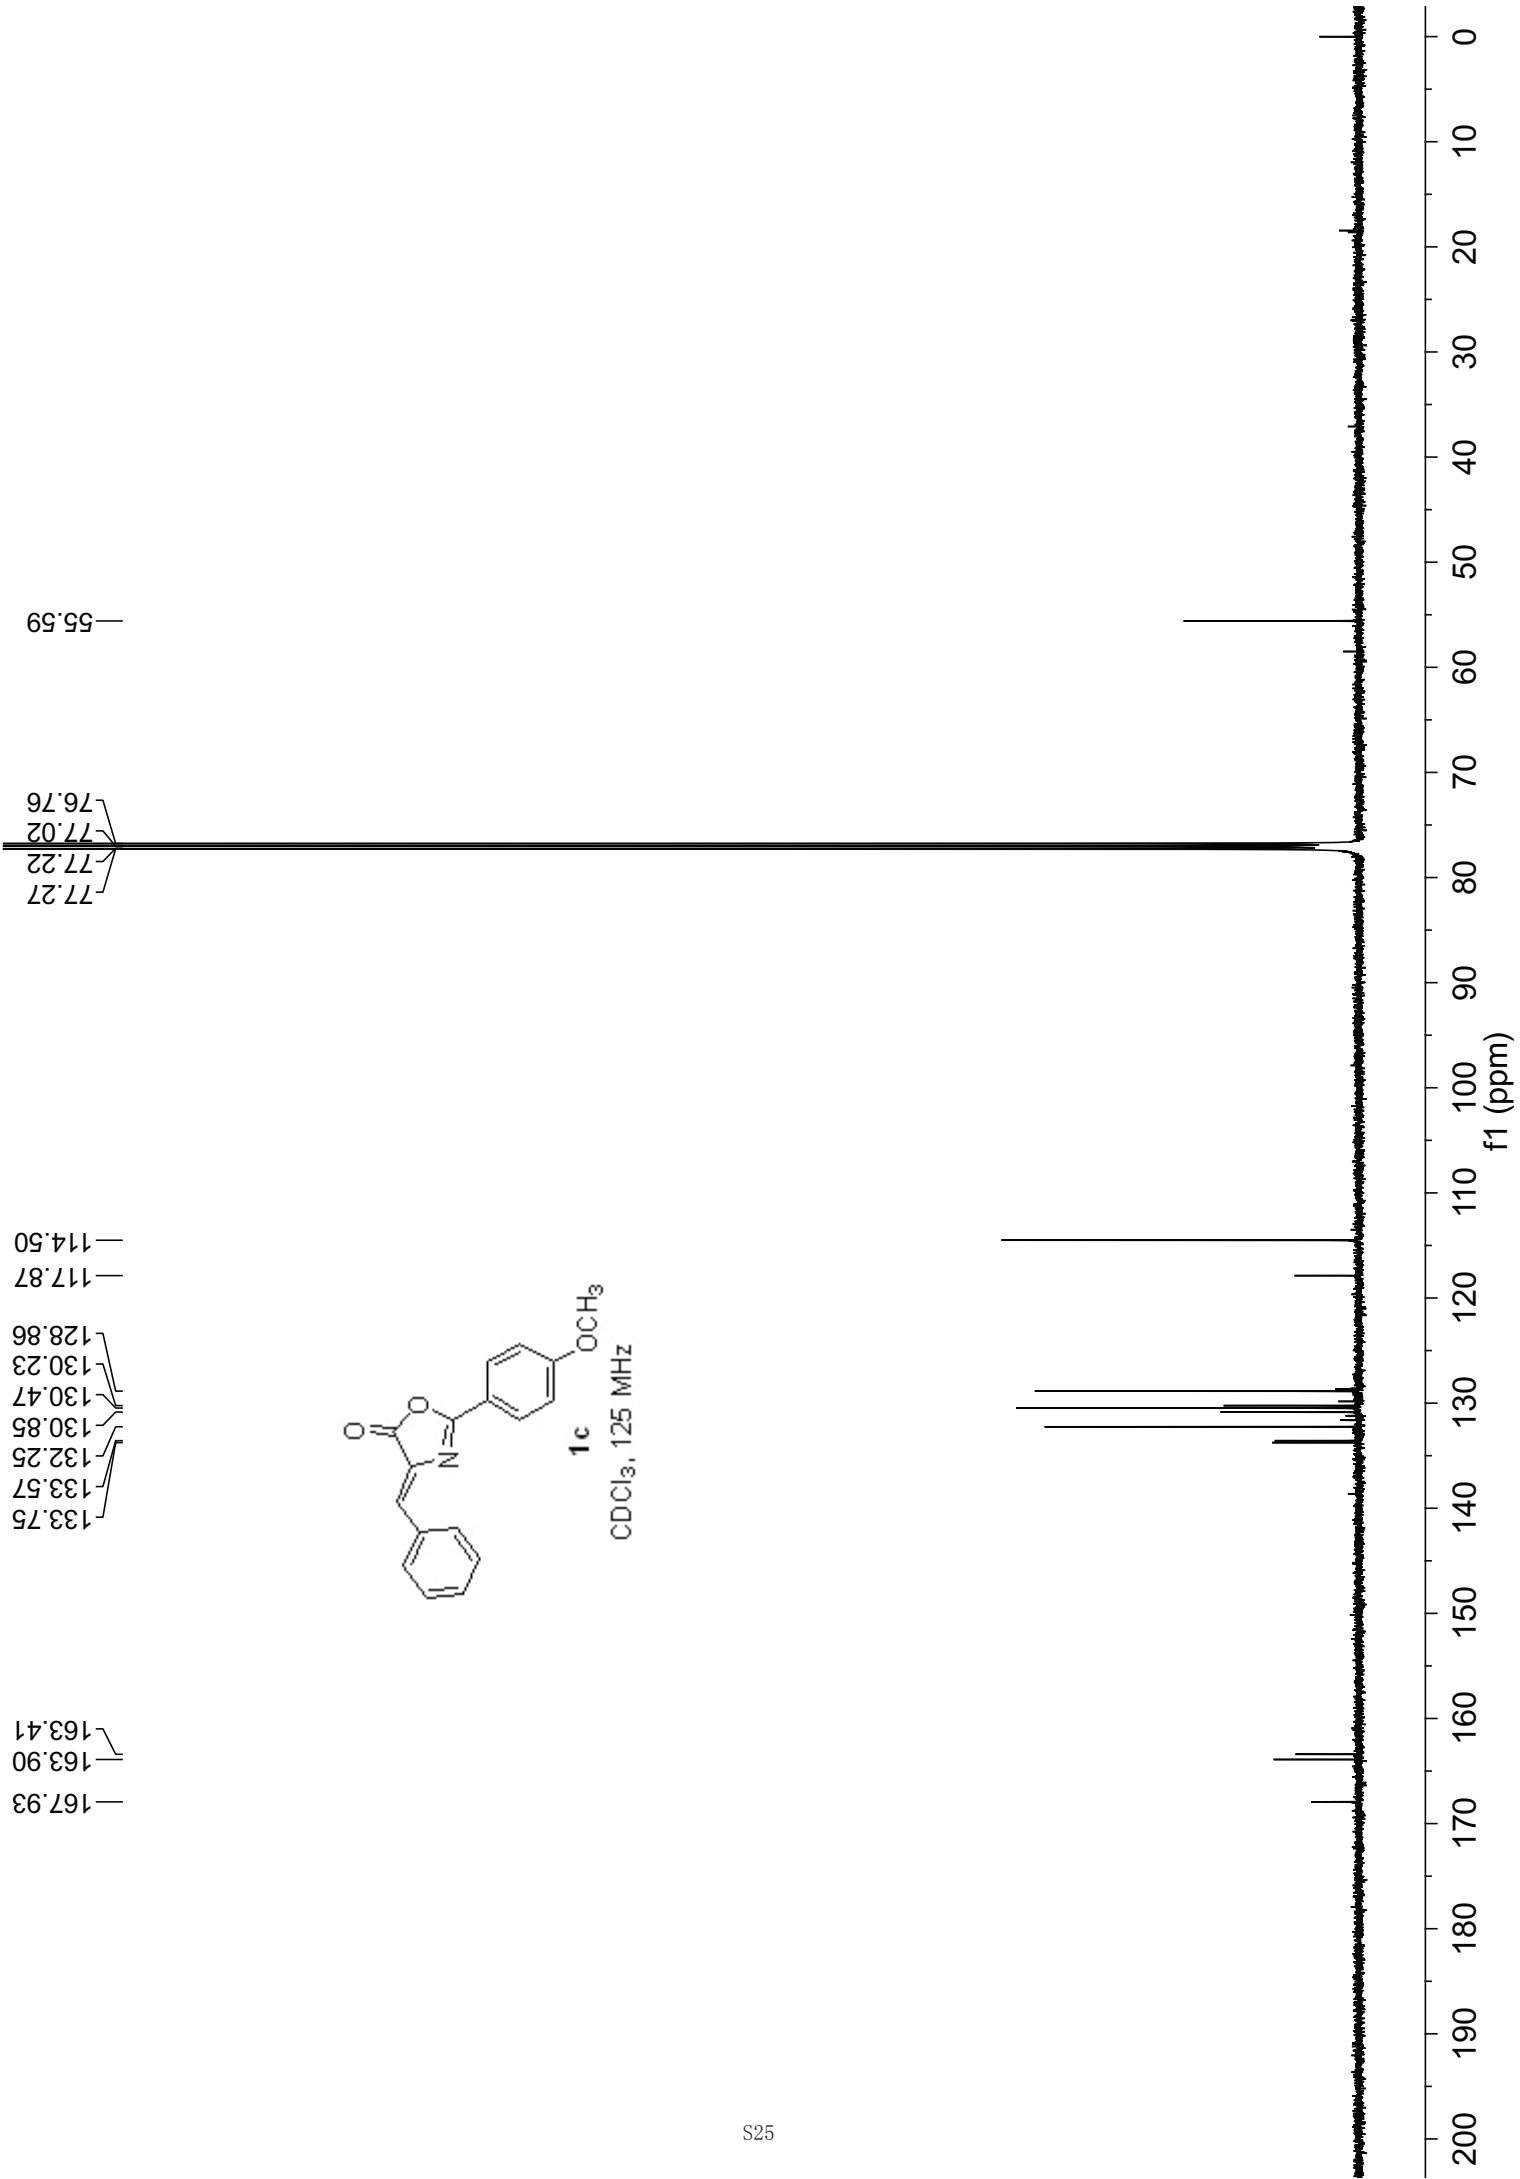

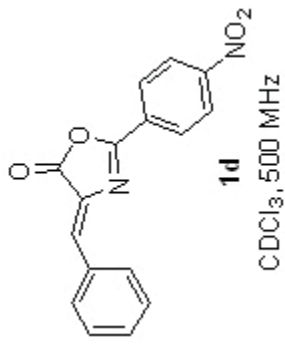

8.4037  
 8.3856  
 8.3716  
 8.3535  
 8.2292  
 8.2220  
 8.2147  
 8.2097  
 7.5240  
 7.5173  
 7.5110  
 7.3862  
 7.2601

1.5801  
 -0.0036

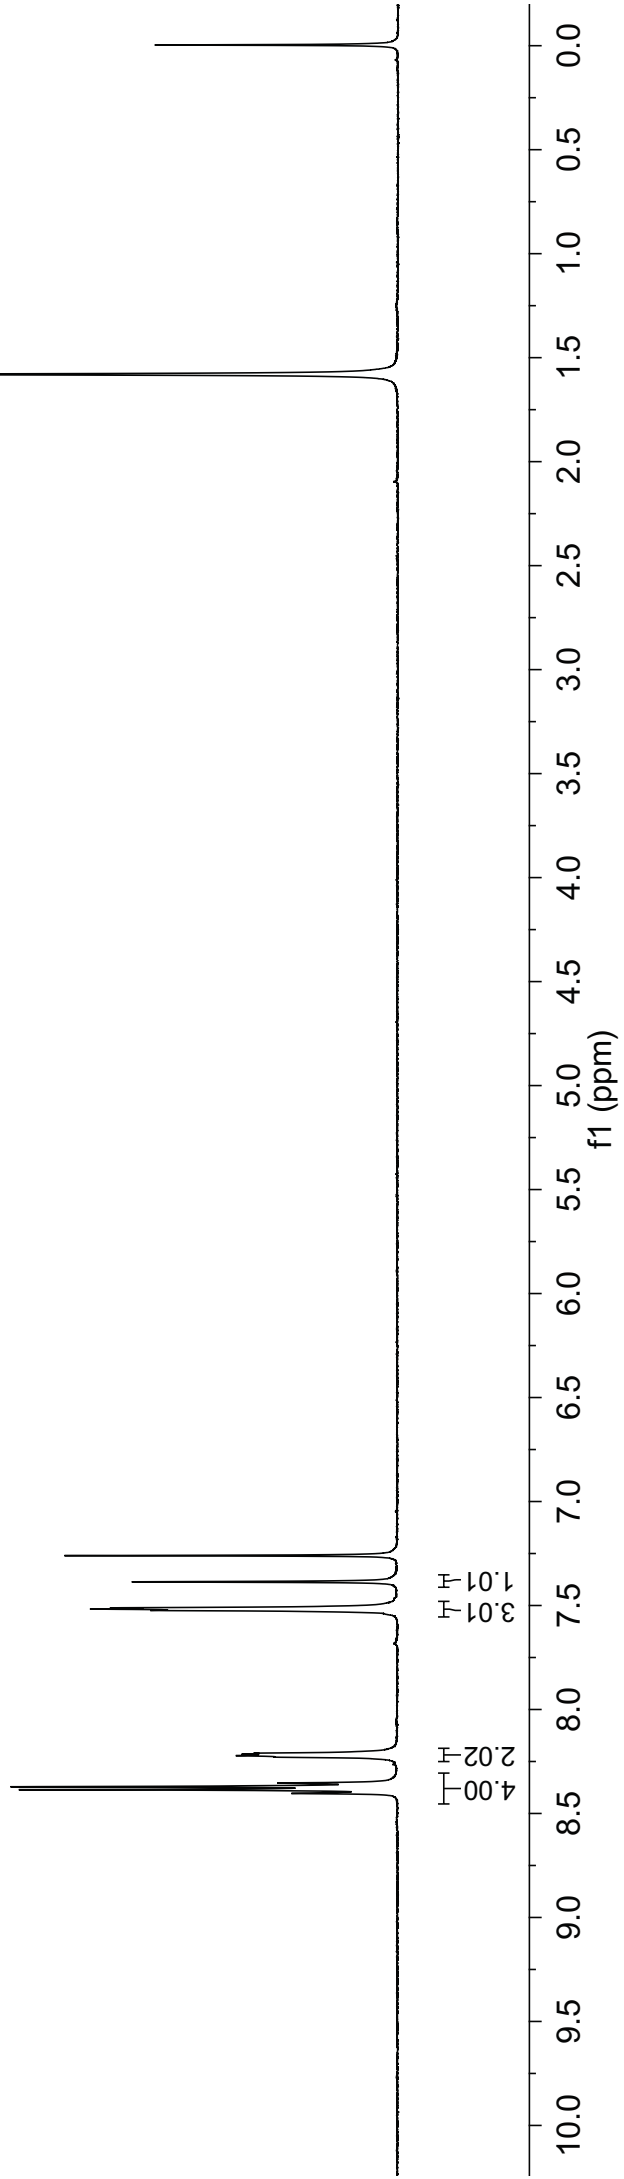

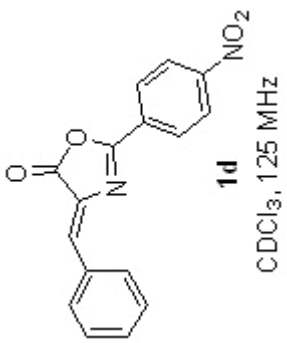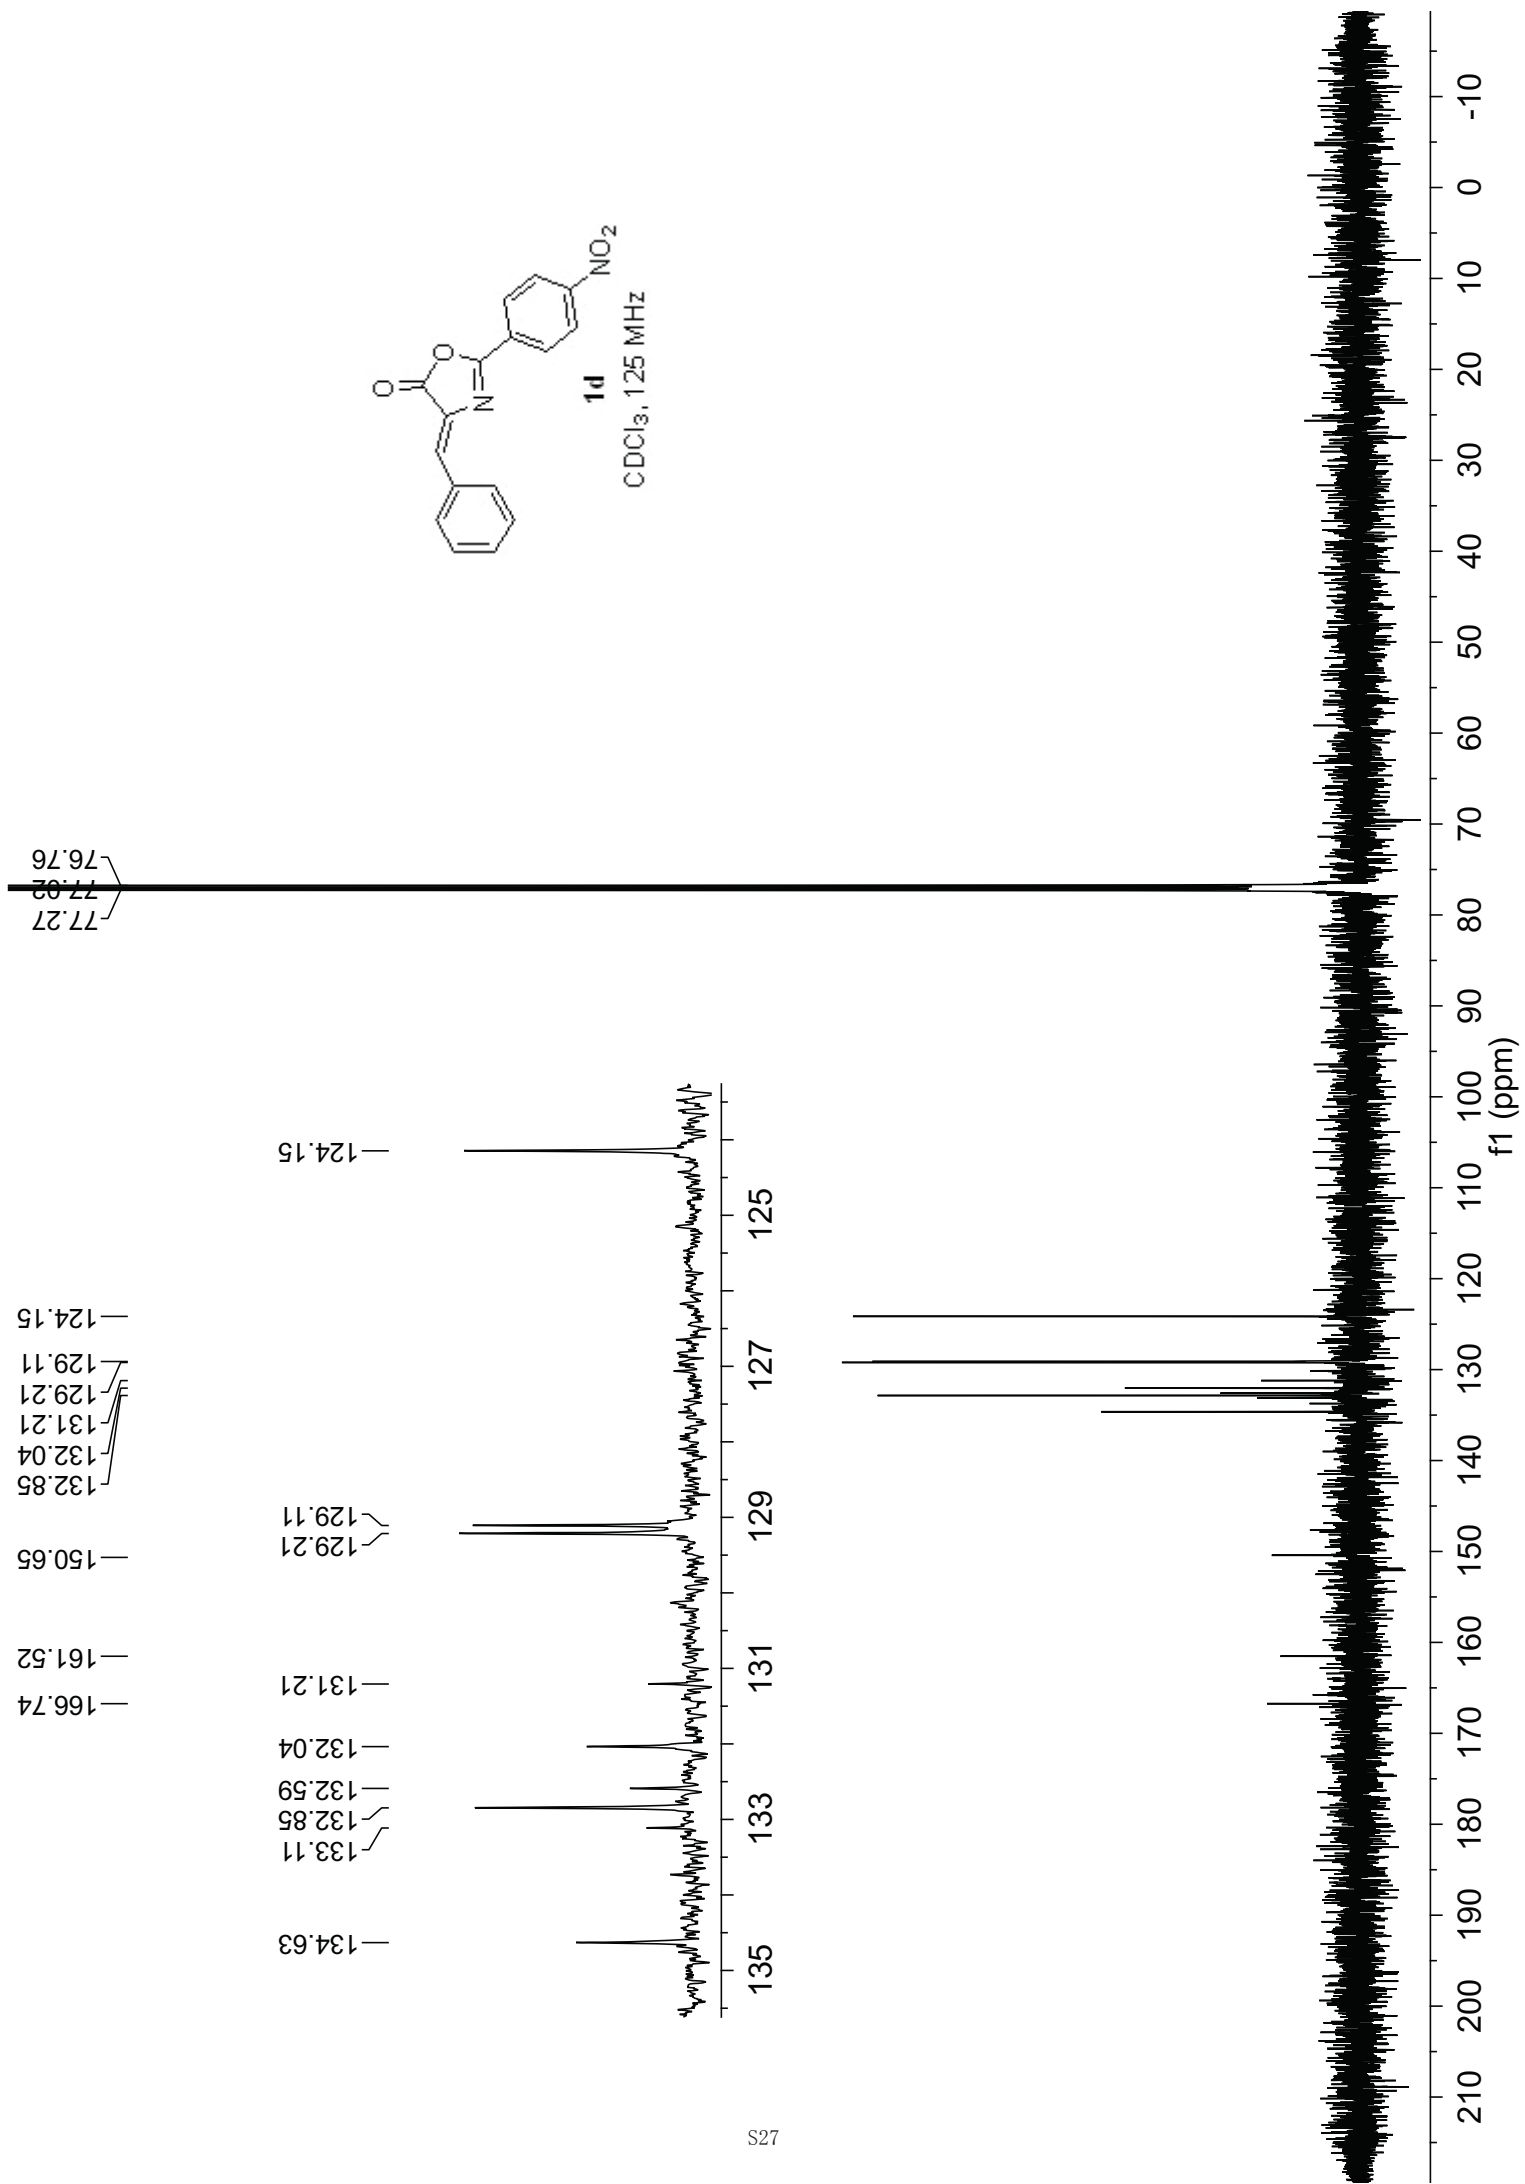

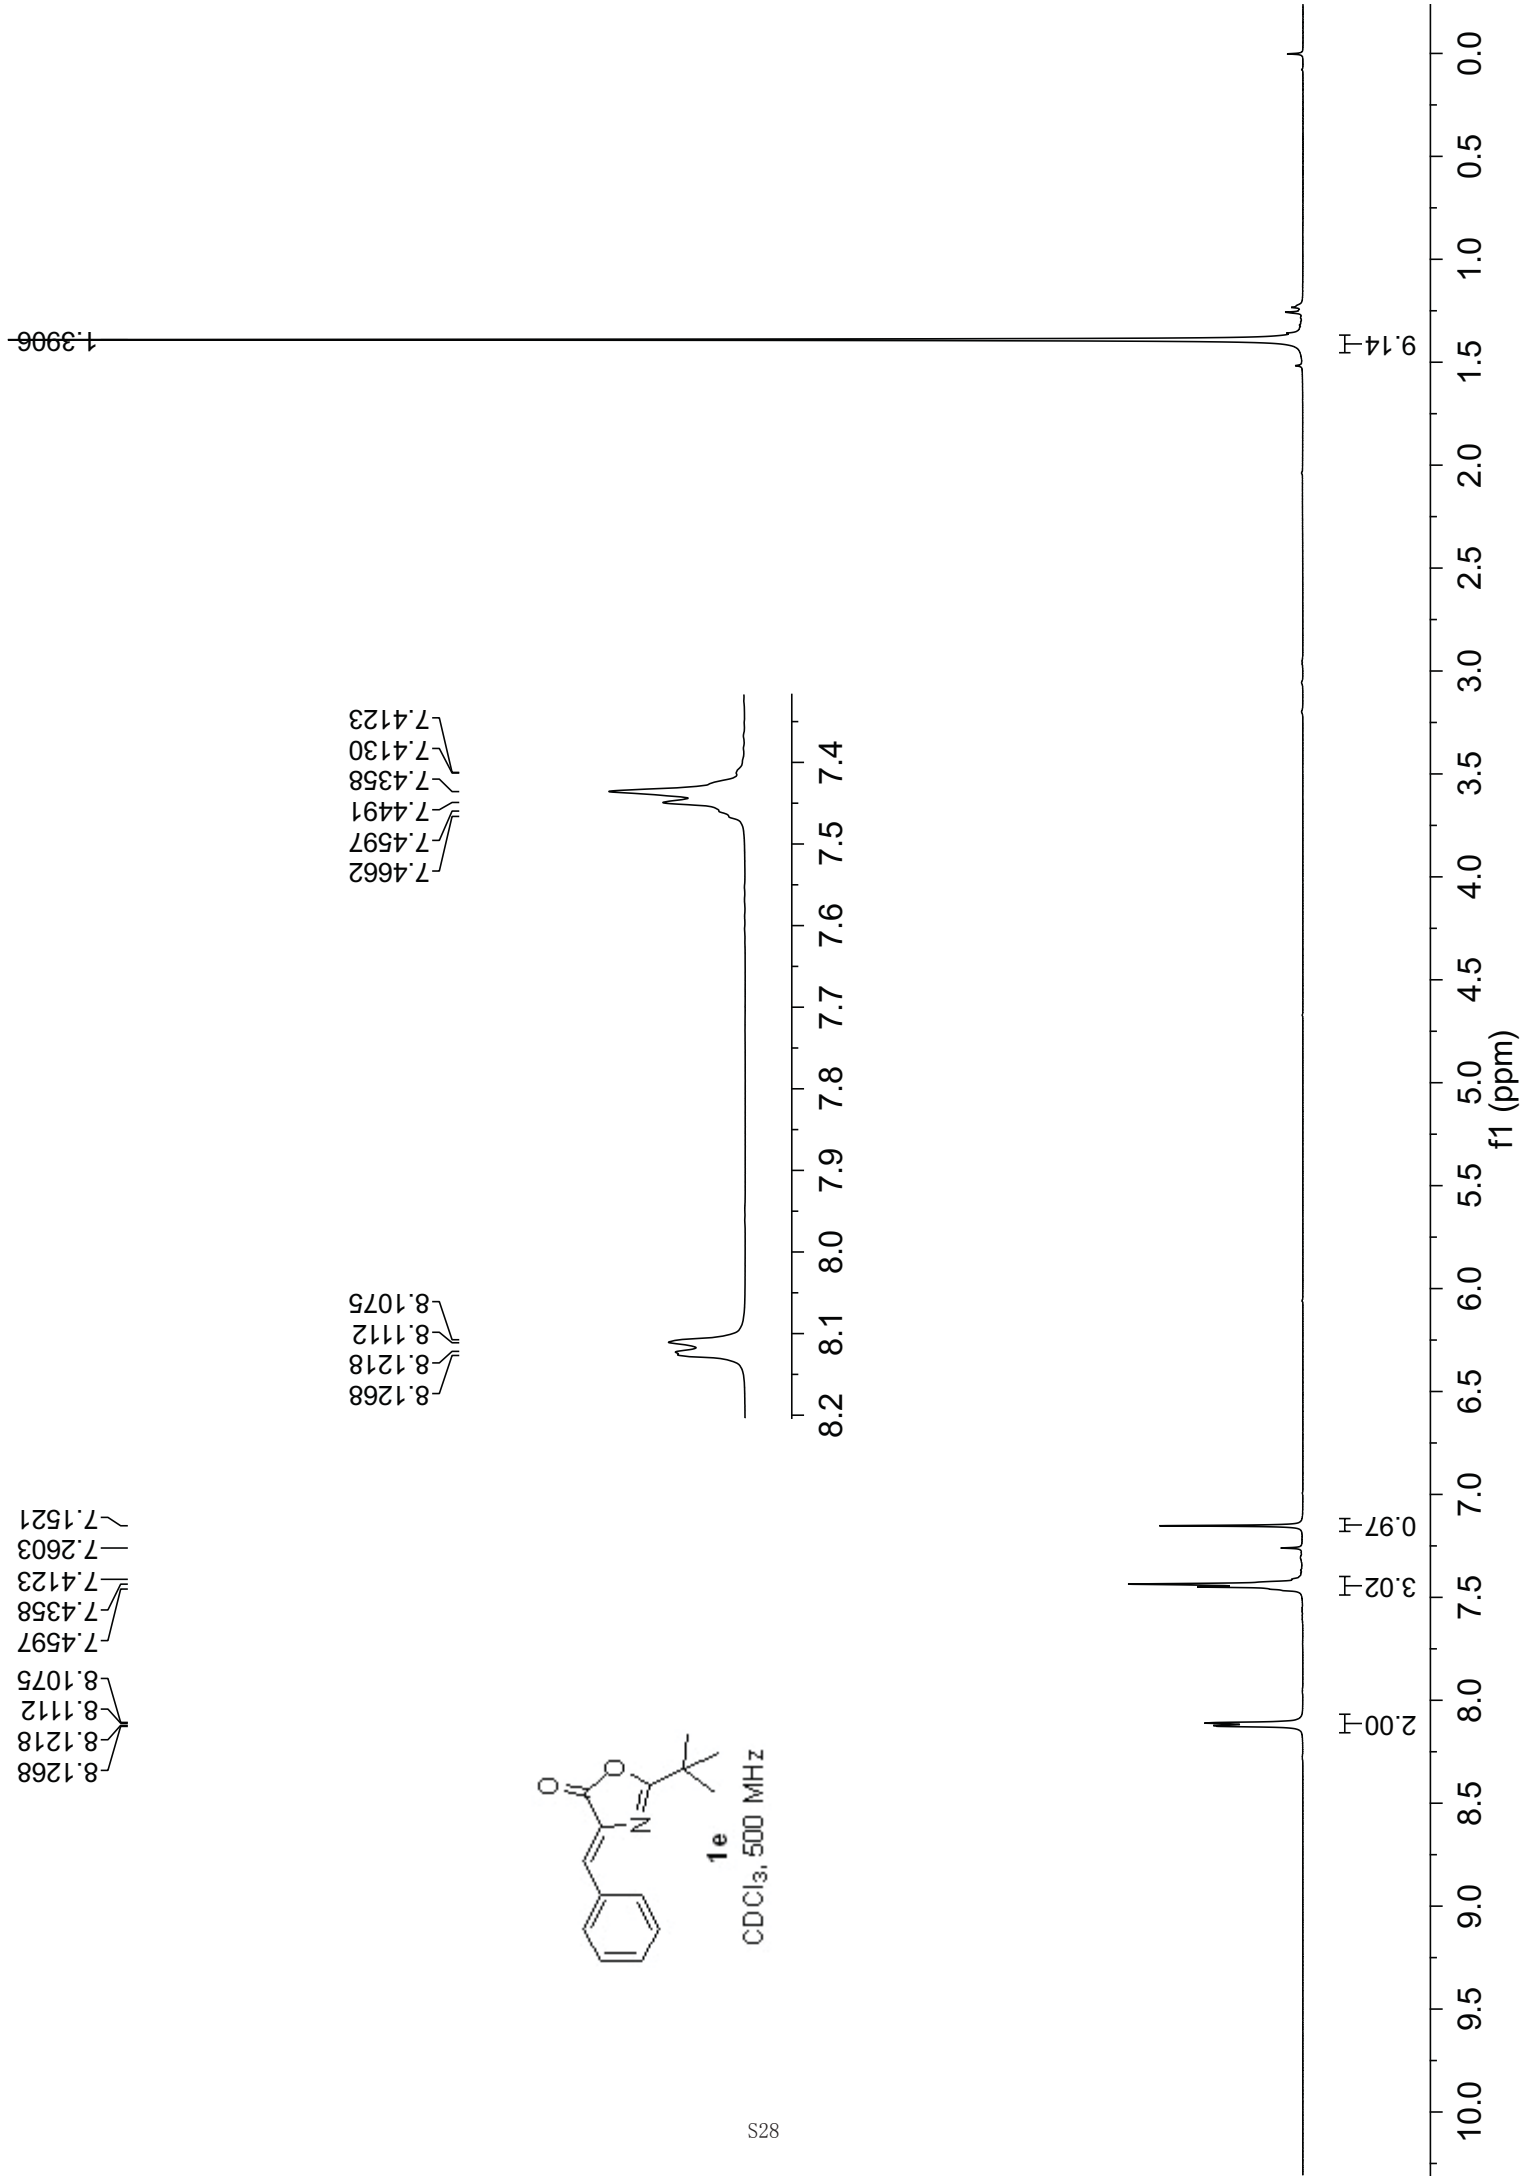

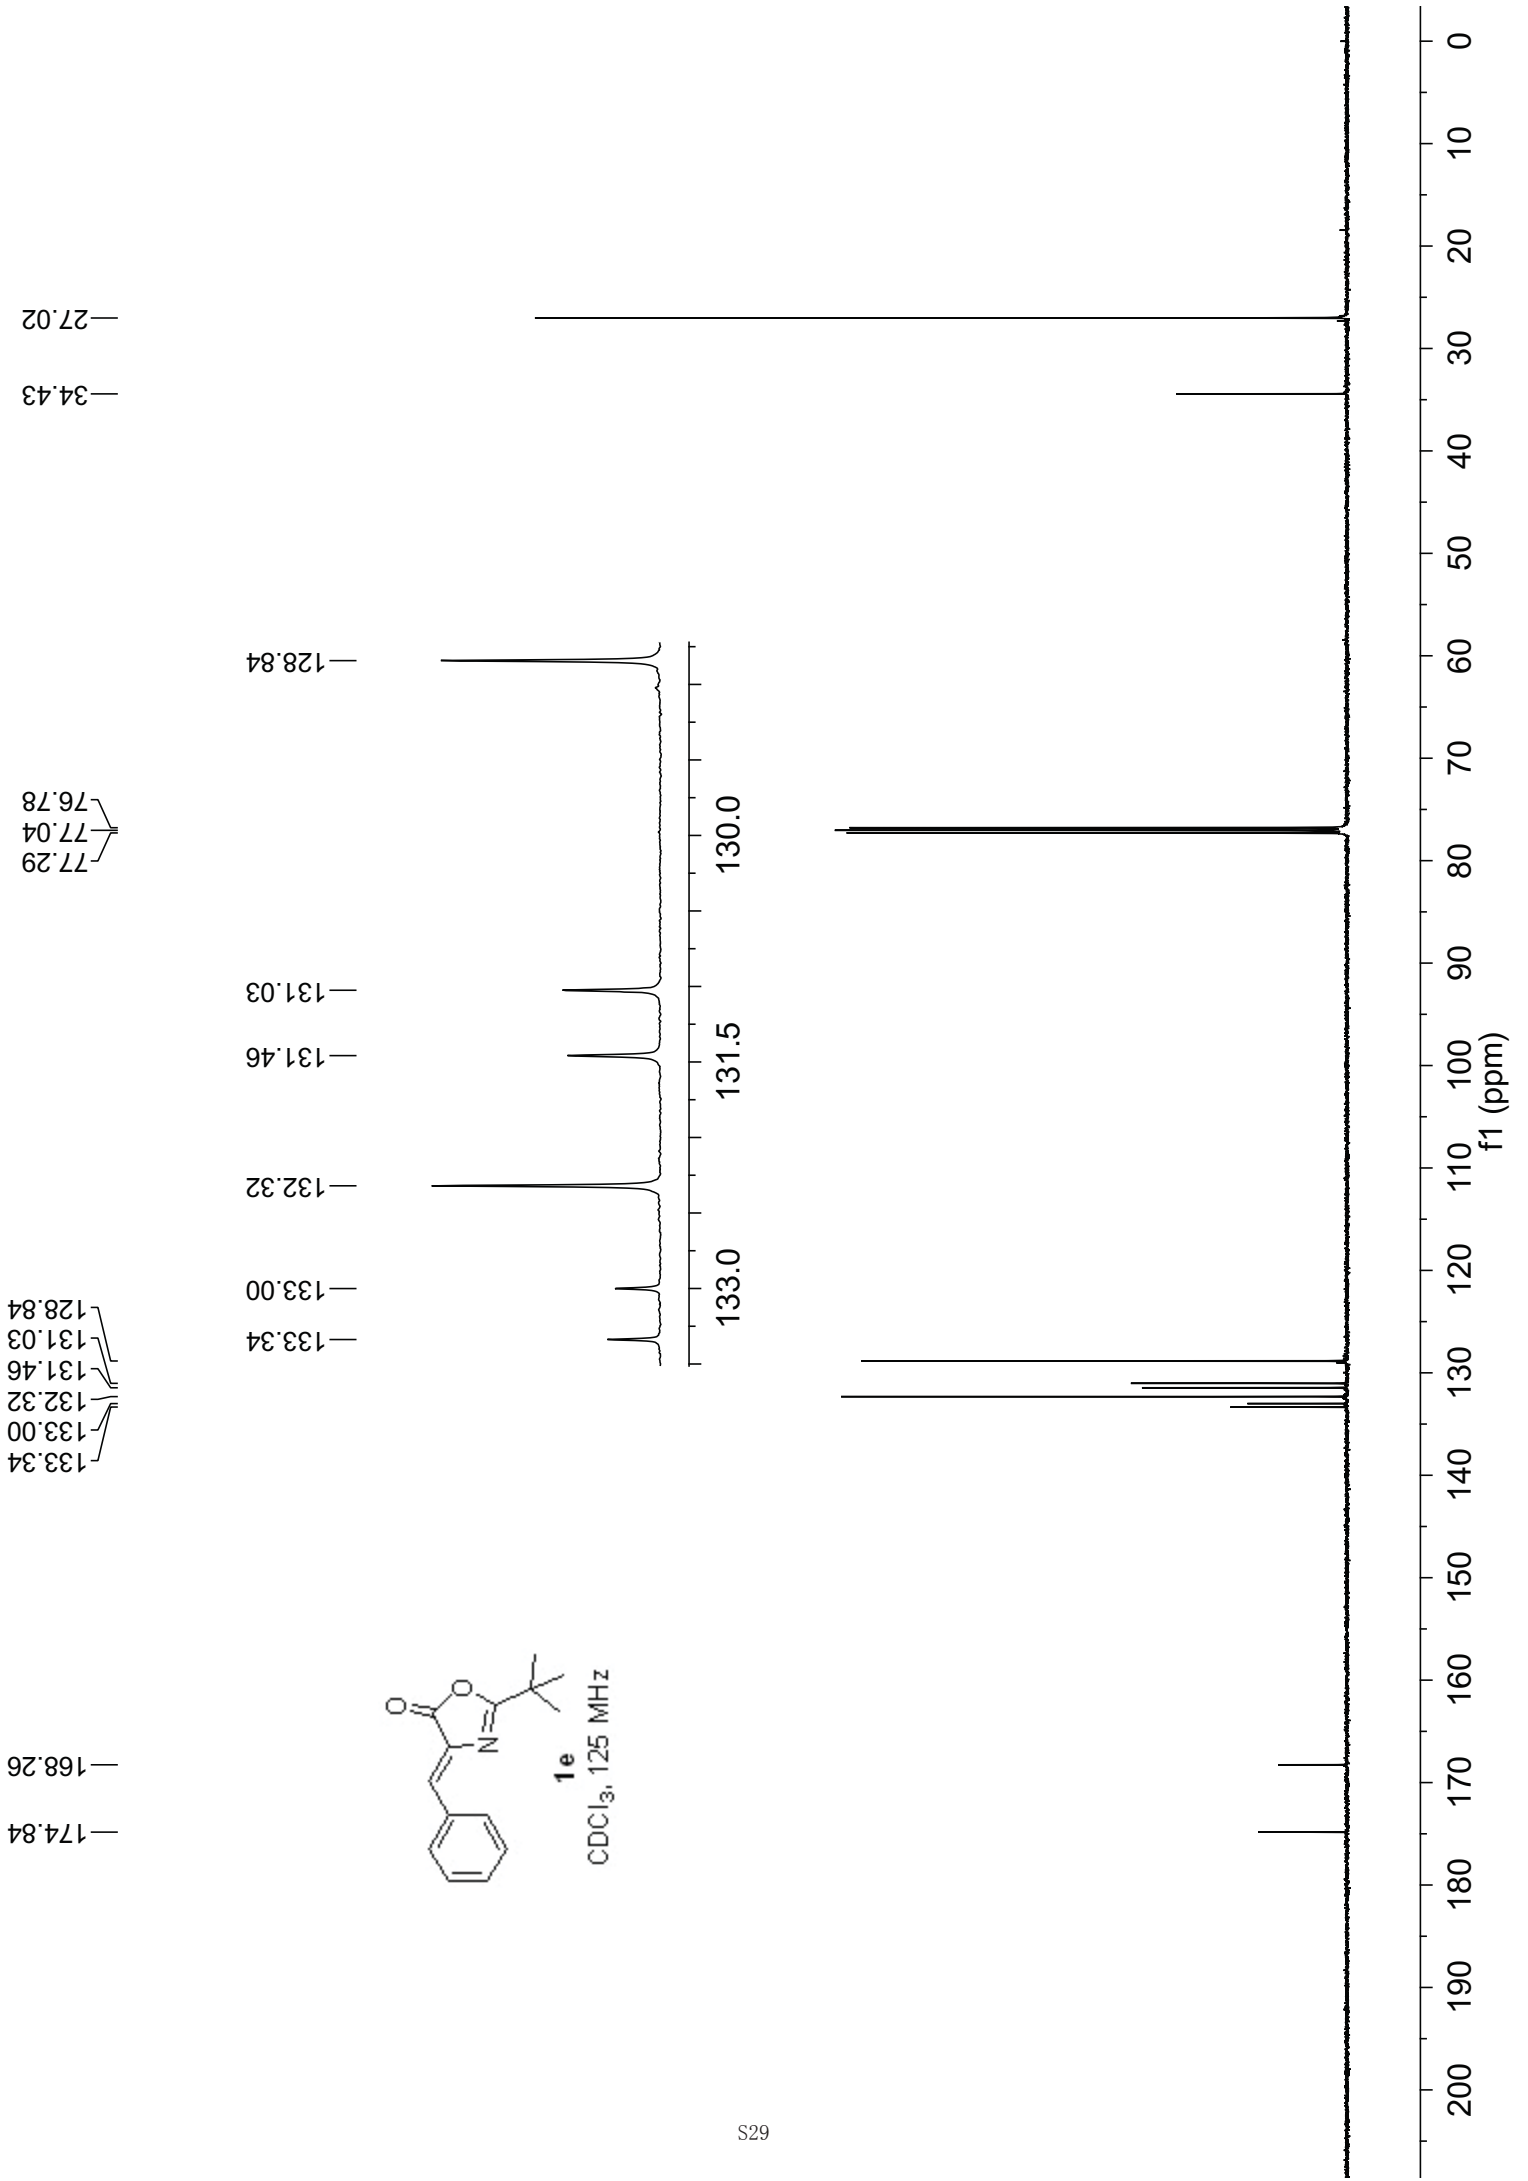

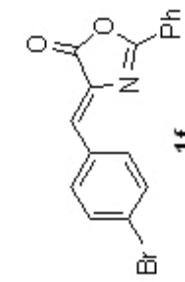

CDCl<sub>3</sub>, 500 MHz

8.1851  
8.1703  
8.0782  
8.0613  
7.5273  
7.2603  
7.1610

7.6467  
7.6319  
7.6171  
7.6001  
7.5579  
7.5424  
7.5273

8.1851  
8.1703  
8.0782  
8.0613

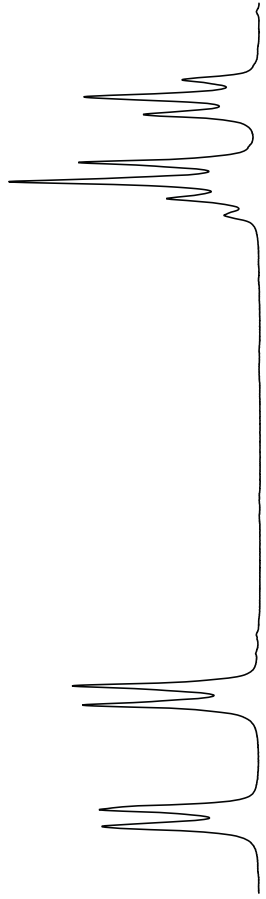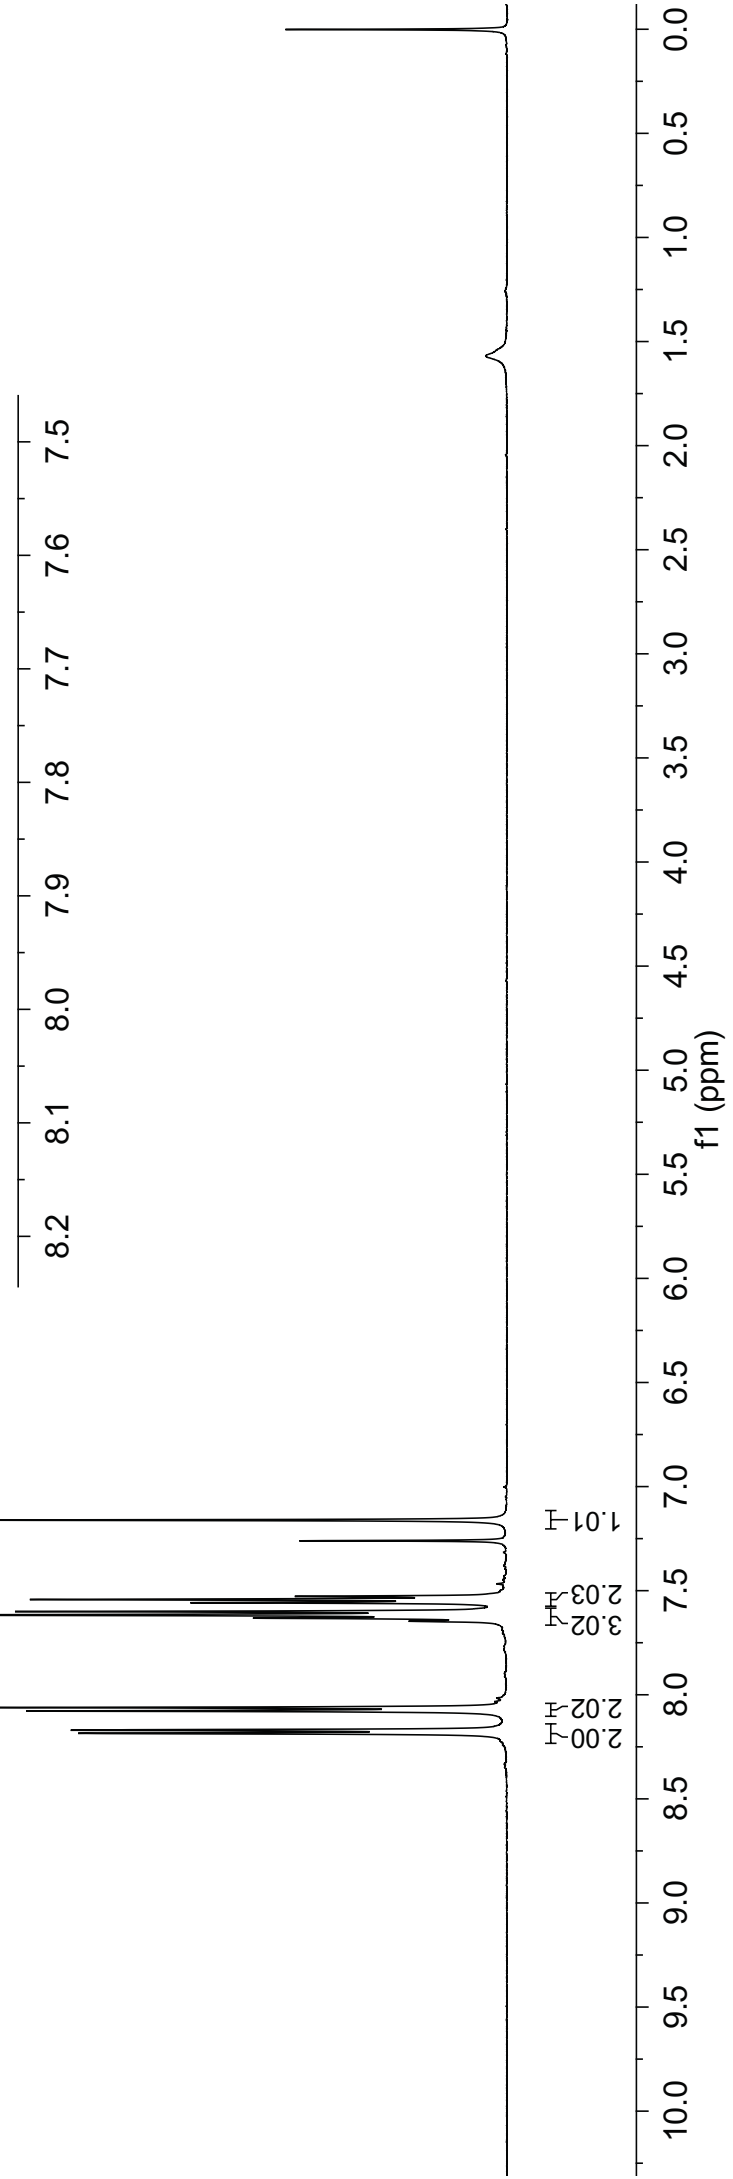

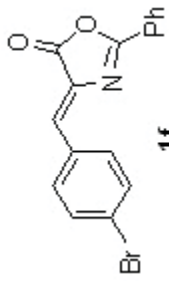

CDCl<sub>3</sub>, 125 MHz

76.78  
77.03  
77.28

125.42  
125.92  
128.47  
129.01  
130.09  
132.23  
132.39  
133.59  
133.65  
133.77

163.93  
167.36

125.92  
128.47  
129.01  
130.09  
132.23  
132.39  
133.59  
133.65  
133.77

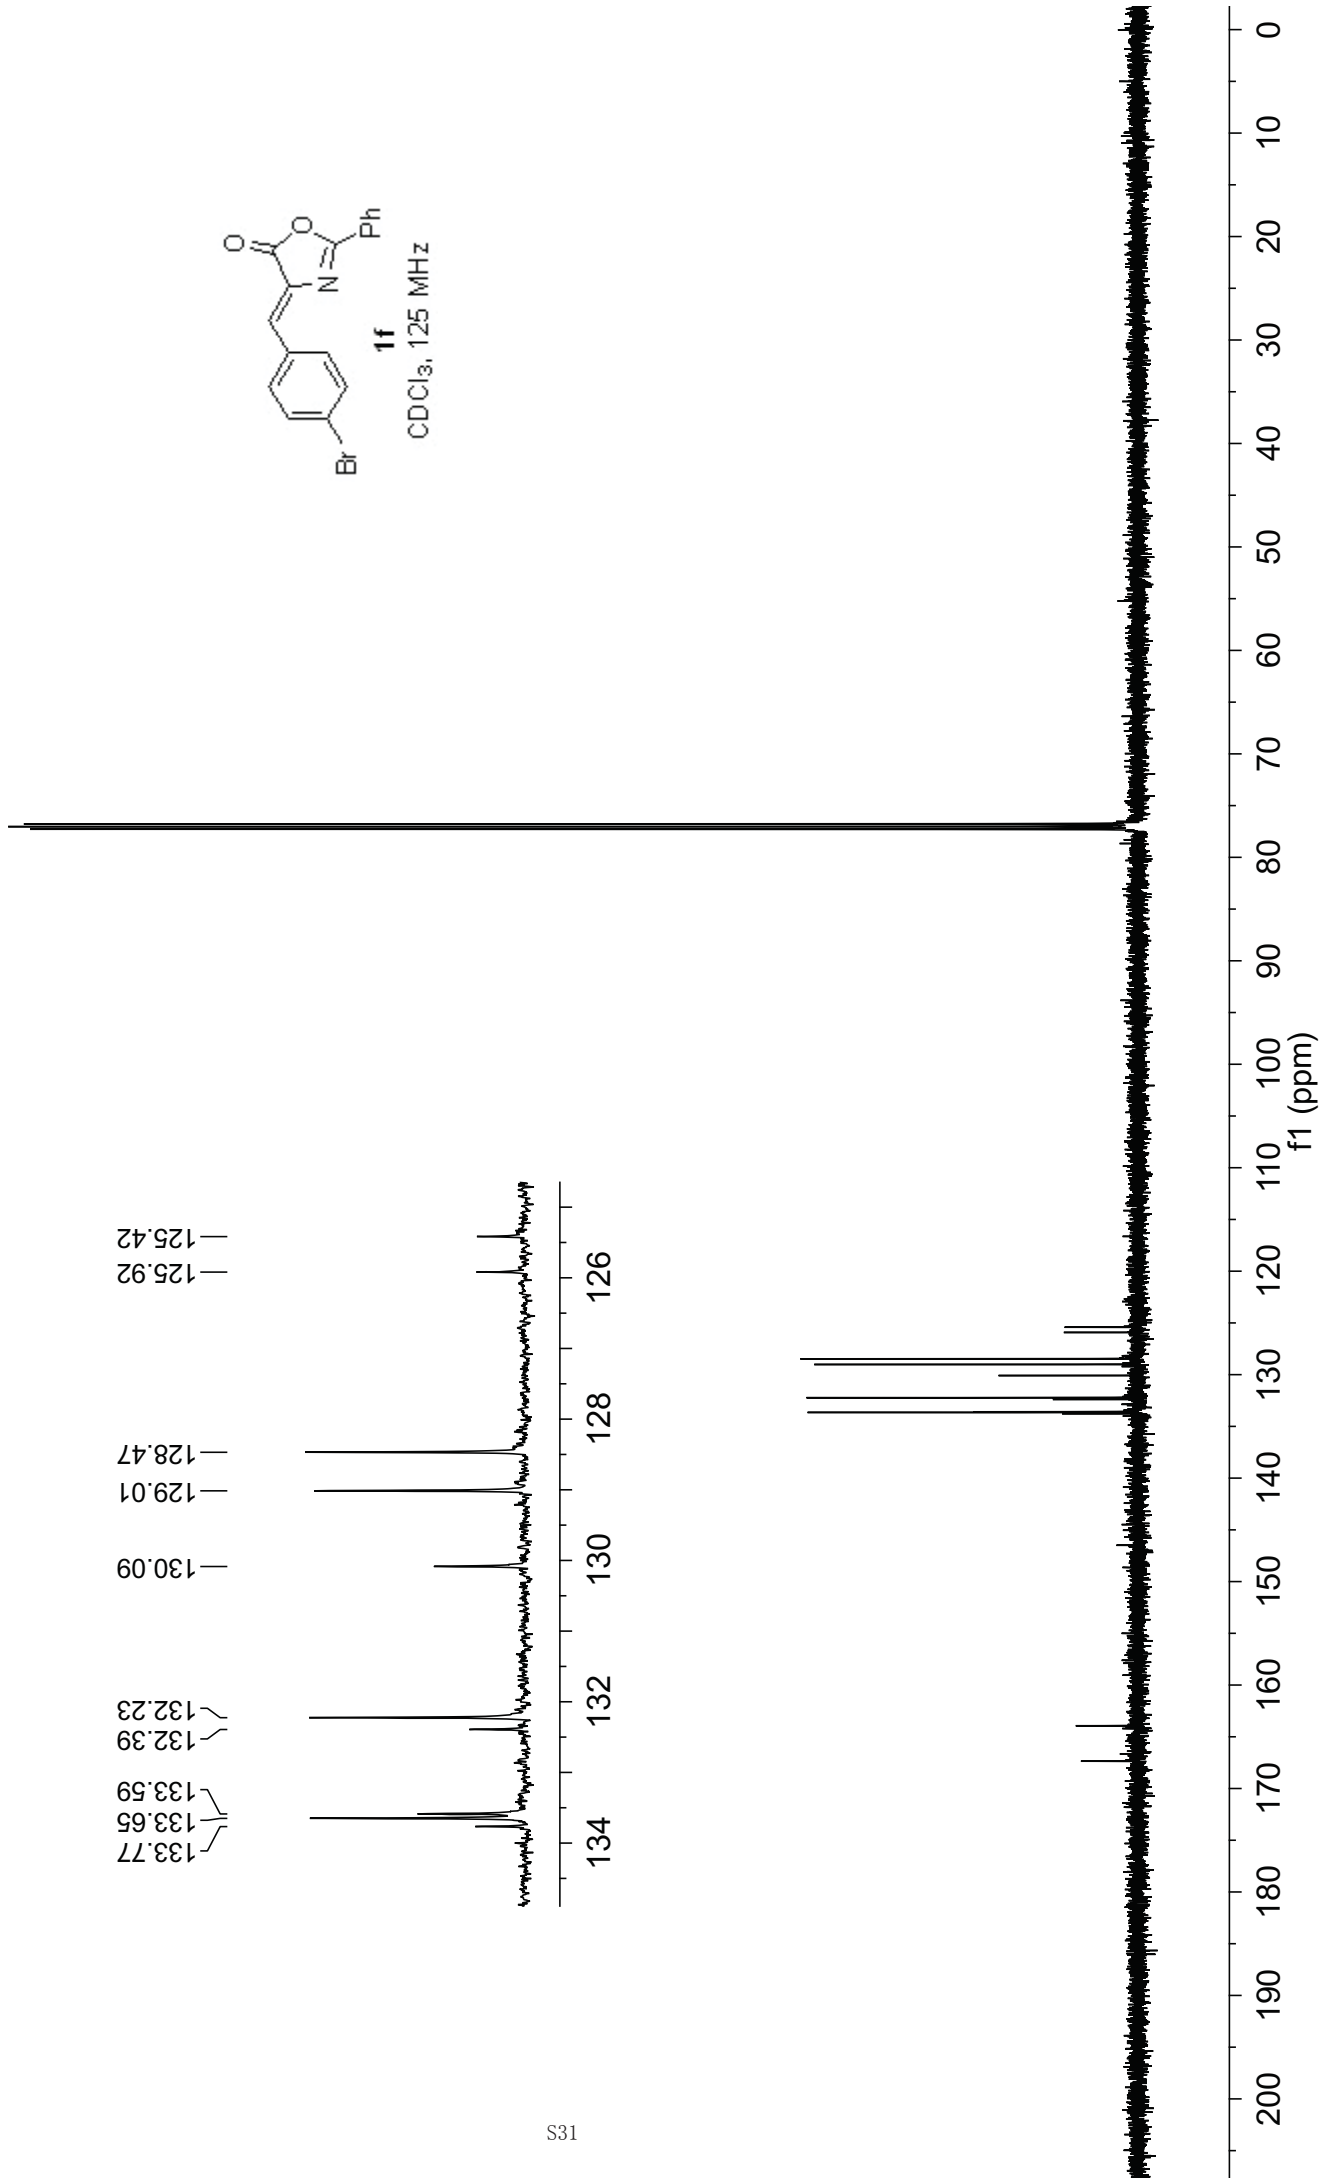

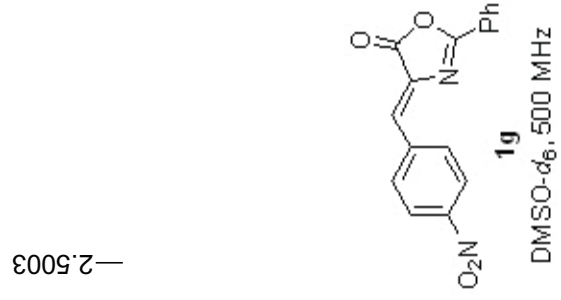

— 2.5003  
 — 3.3241

— 7.4770  
 — 7.6567  
 — 7.6716  
 — 7.6875  
 — 7.7588  
 — 7.7737  
 — 7.7886  
 — 8.1754  
 — 8.1781  
 — 8.1818  
 — 8.1818  
 — 8.1924  
 — 8.3455  
 — 8.3634  
 — 8.5416  
 — 8.5592

— 7.4770  
 — 7.6567  
 — 7.6875  
 — 8.1754  
 — 8.1818  
 — 8.3455  
 — 8.5416  
 — 8.5592

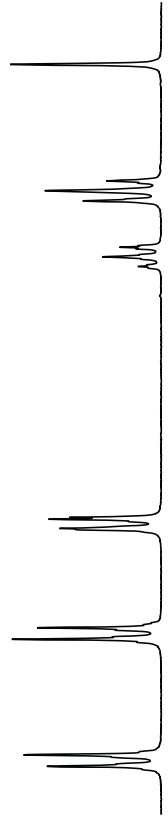

S32

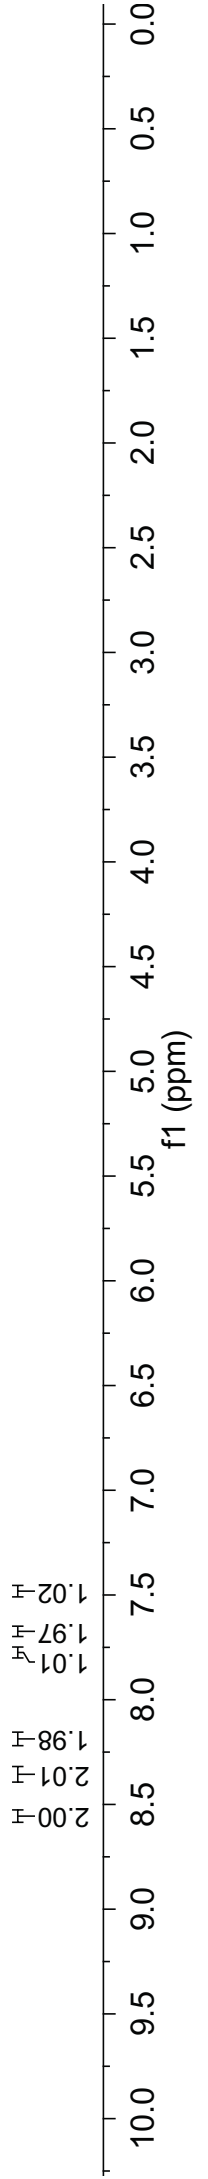



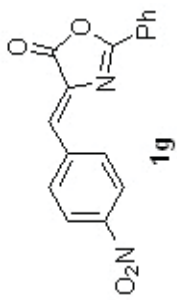

DMSO- $d_6$ , 125 MHz

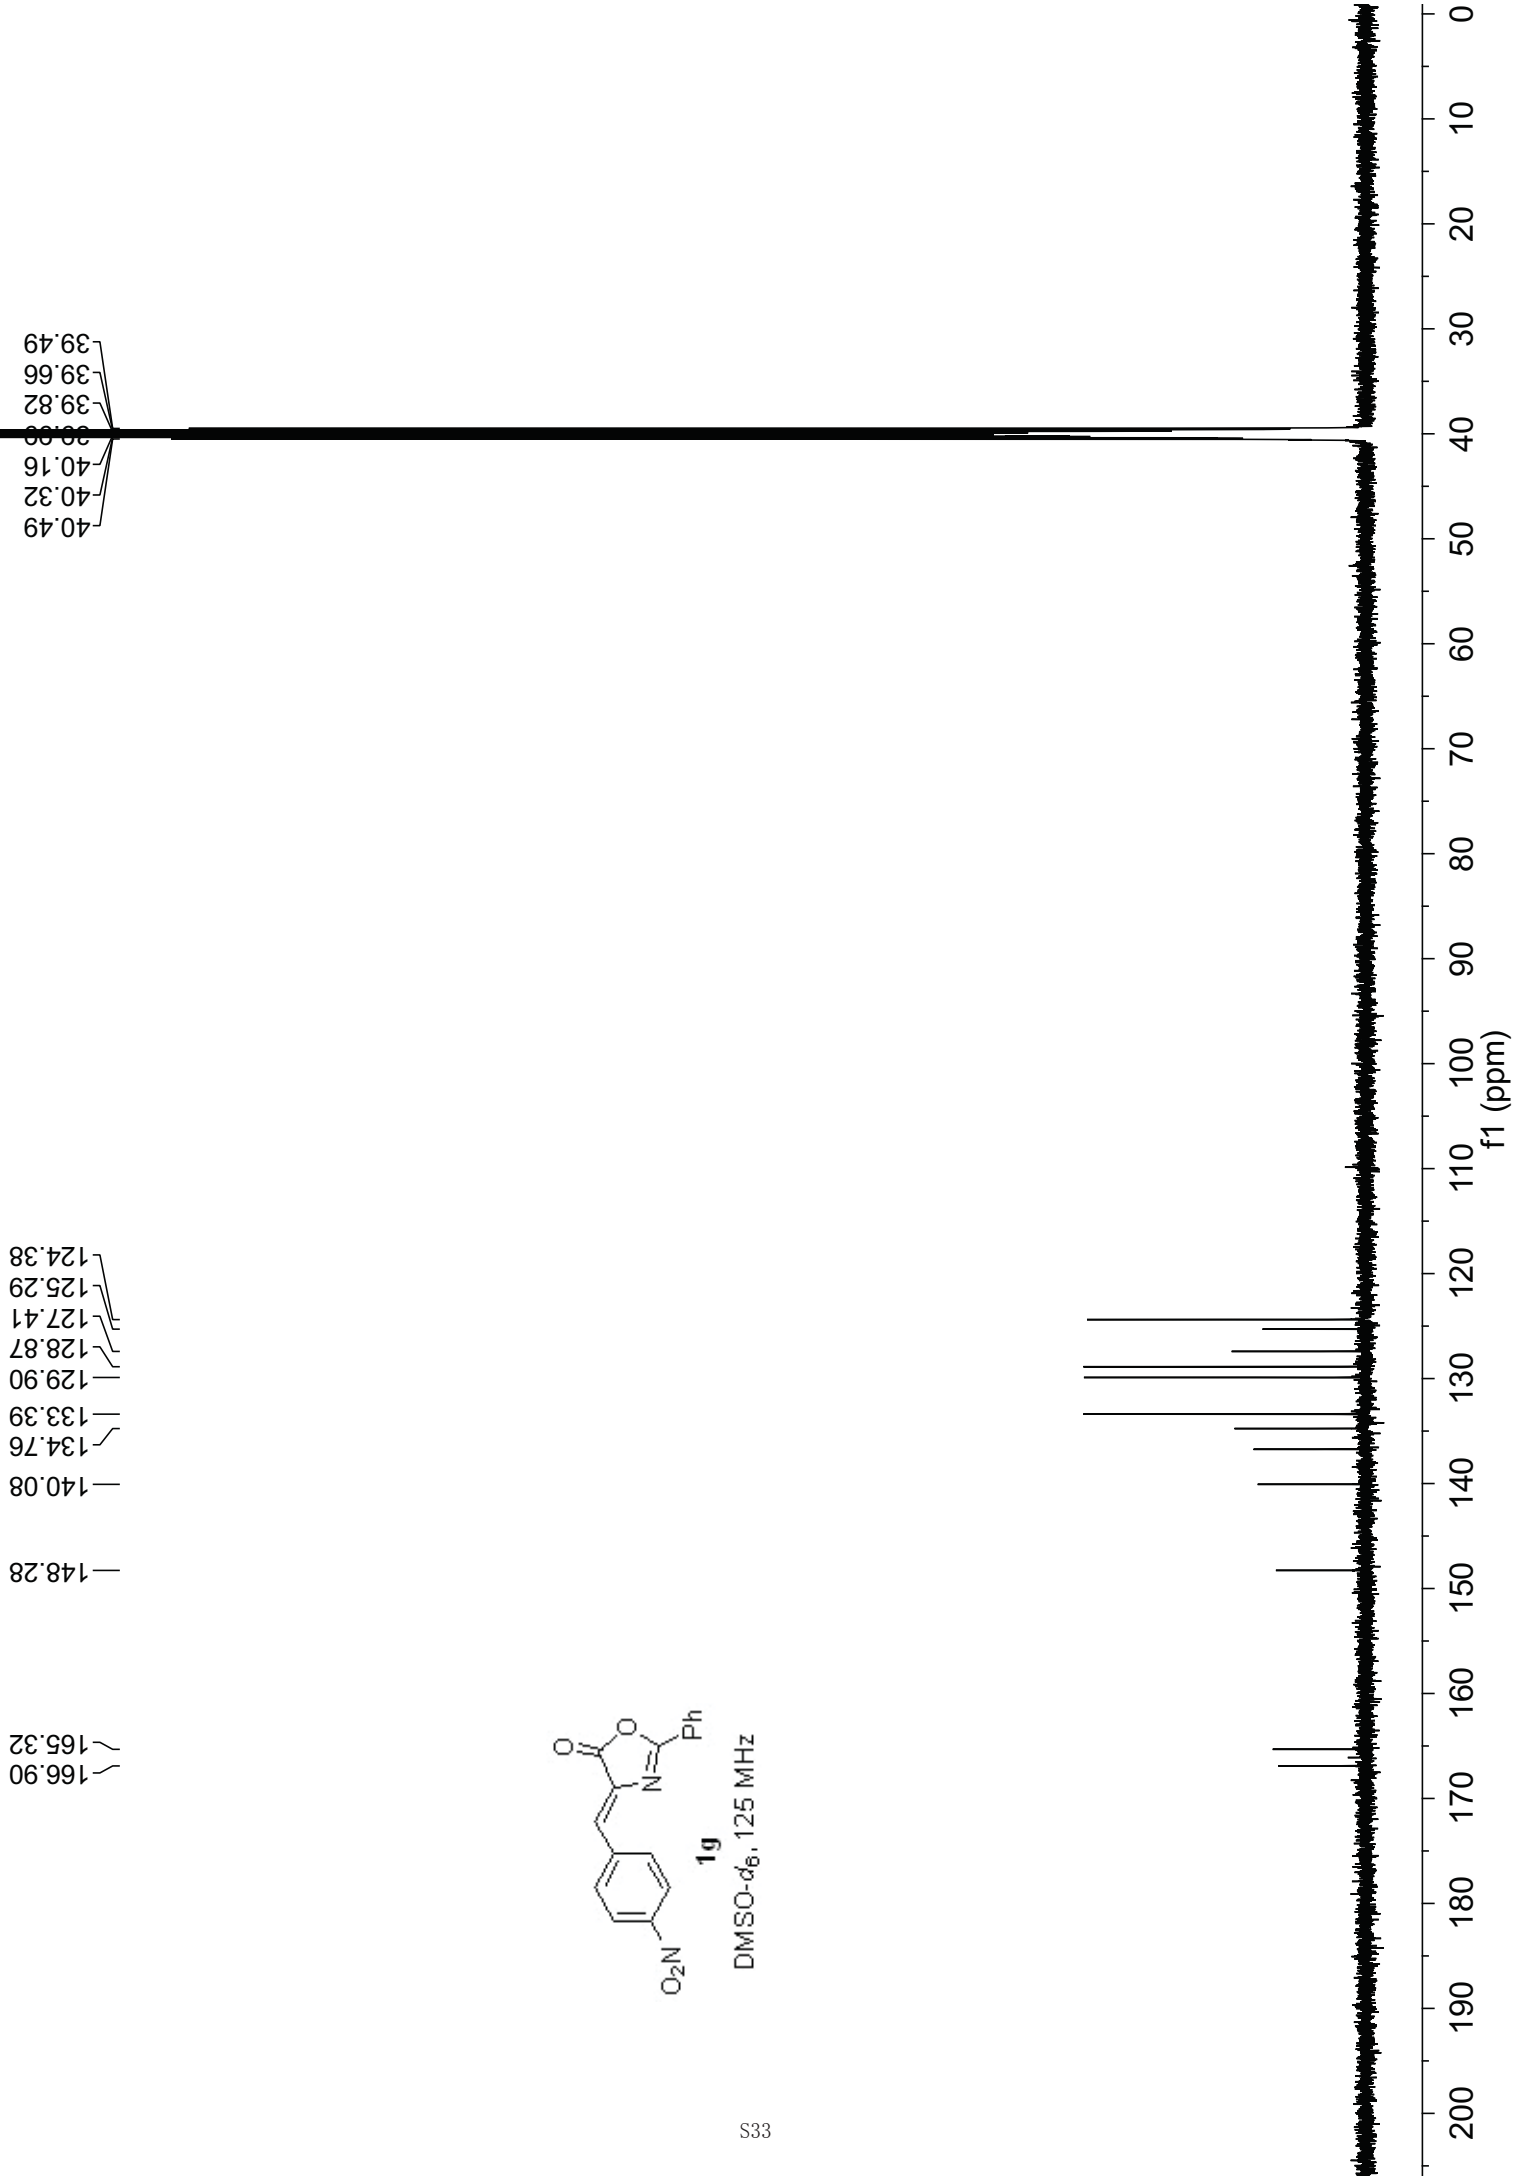

— 2.4258

8.1820  
8.1673  
8.1103  
8.0942  
7.6048  
7.5439  
7.5135  
7.2933  
7.2773  
7.2603  
7.2287

7.6195  
7.6048  
7.5900  
7.5439  
7.5283  
7.5135  
7.2933  
7.2773  
7.2603  
7.2287

8.1820  
8.1673  
8.1103  
8.0942

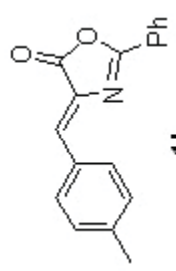

CDCI<sub>3</sub>, 500 MHz

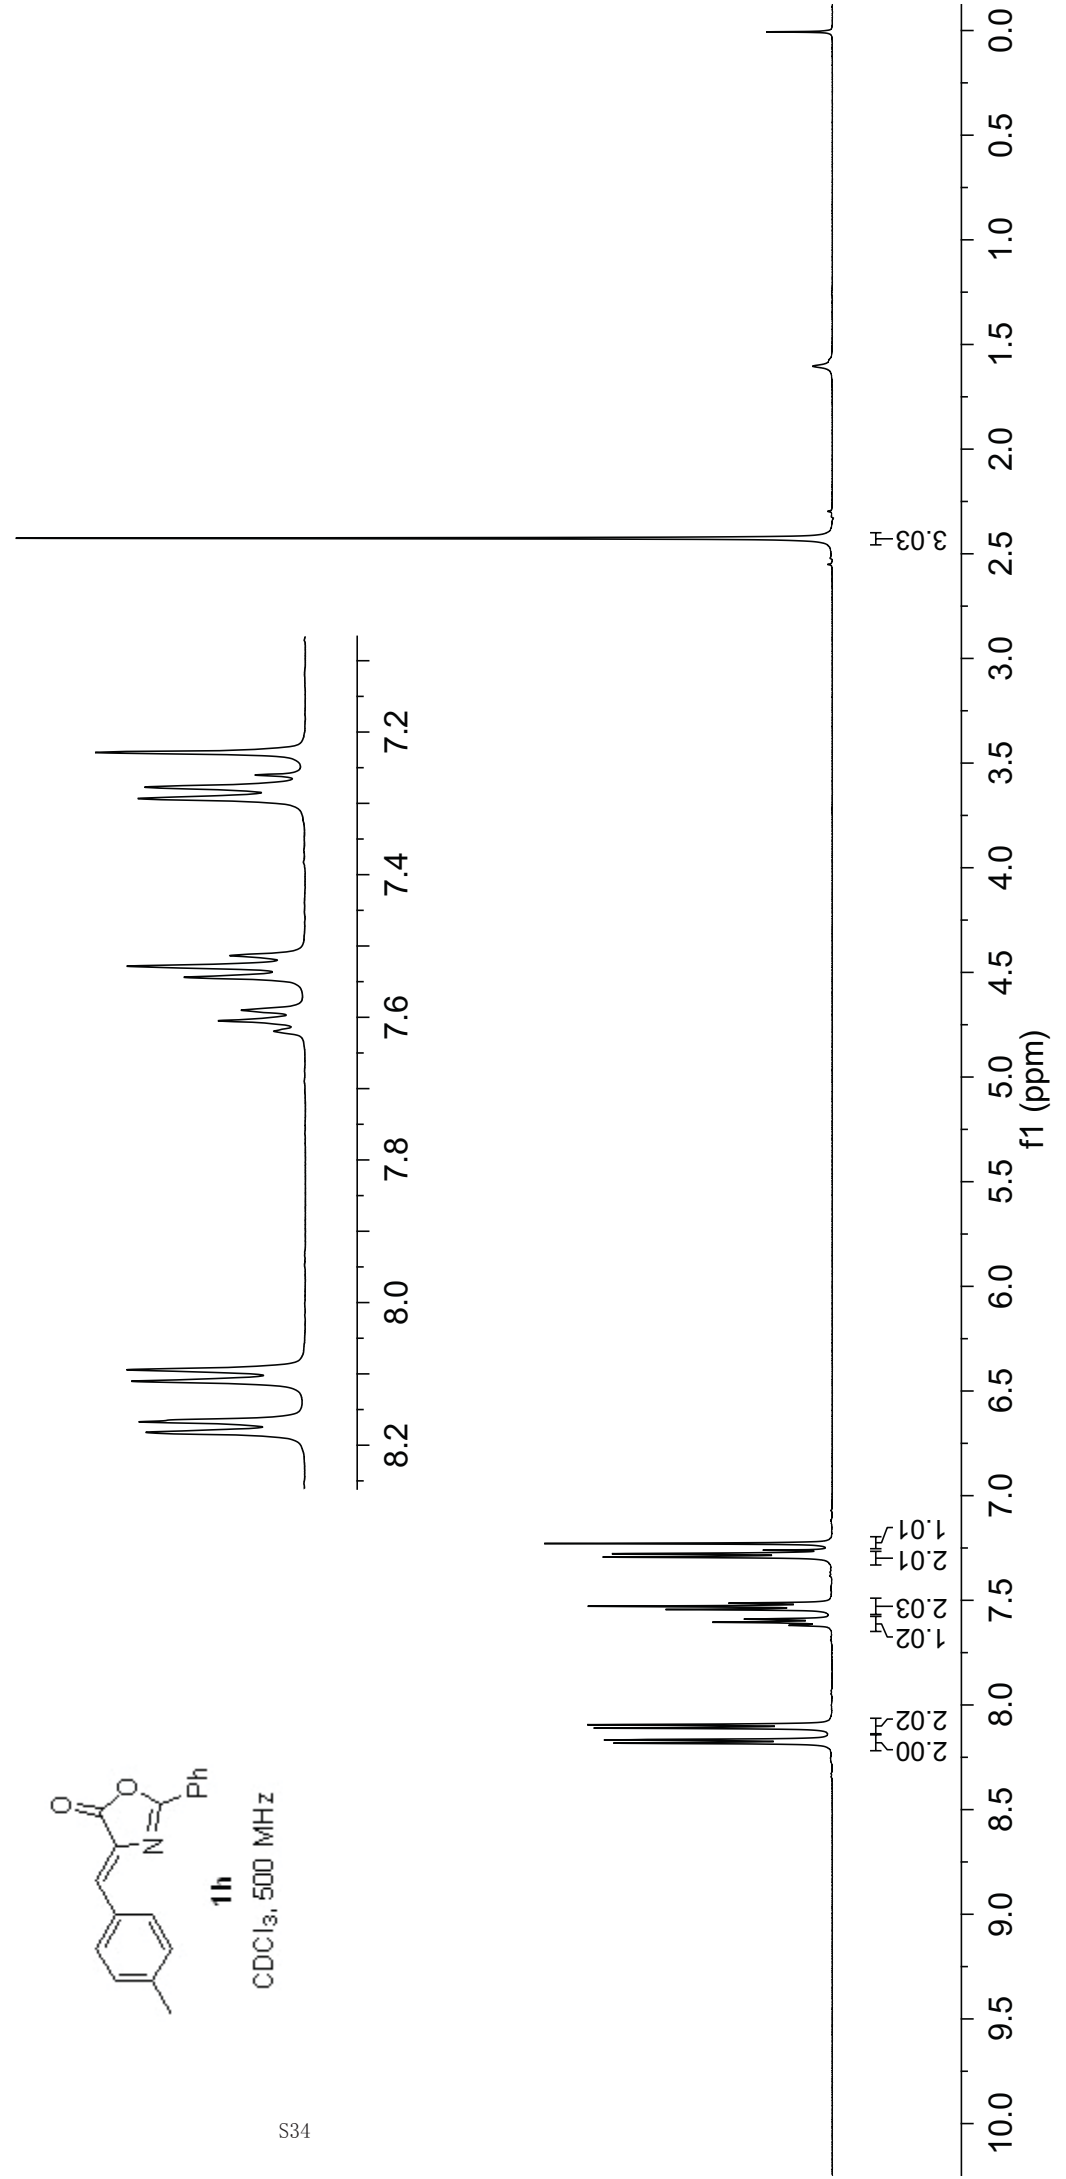

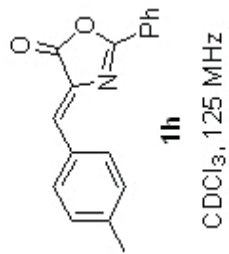

—21.83

77.33  
77.07  
76.82167.81  
162.99  
133.18  
132.55  
132.42  
132.05  
142.11  
133.18  
130.90  
129.74  
132.42  
132.05  
130.90  
129.74  
128.91  
128.28  
125.72  
125.72133.18  
132.55  
132.42  
132.05  
130.90  
129.74  
128.91  
128.28  
125.72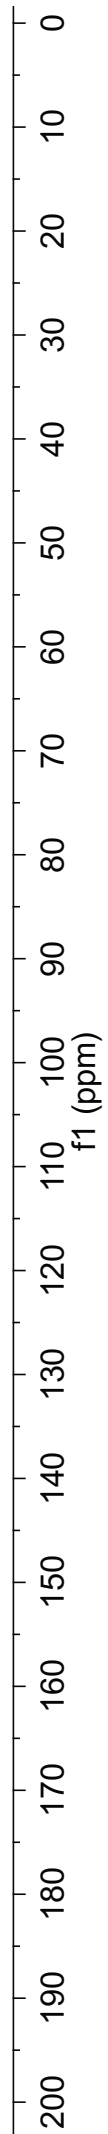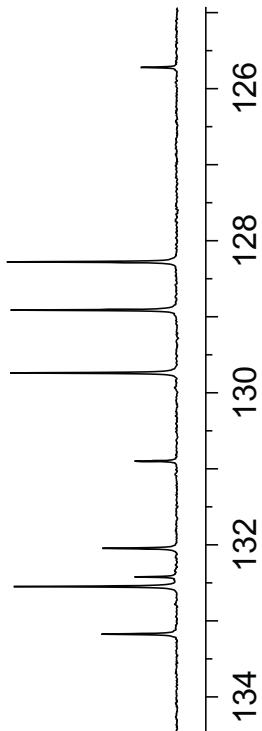

—0.0094

—1.5838

8.5310  
8.5140  
8.4574  
8.2064  
7.8489  
7.6434  
7.6289  
7.6142  
7.5812  
7.5686  
7.5533  
7.5386  
7.5193  
7.3880  
7.2604

8.5310  
8.5140  
8.4574  
8.2210  
8.2064  
7.9416  
7.9247  
7.9187  
7.9010  
7.8645  
7.8489  
7.6289  
7.6142  
7.5812  
7.5686  
7.5533  
7.5386  
7.5193  
7.3880  
7.2604

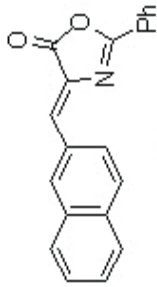

CDCl<sub>3</sub>, 500 MHz

S36

8.5 8.3 8.1 7.9 7.7 7.5 7.3

1.00  
1.01  
1.98  
2.04  
2.03  
1.02  
1.00

f1 (ppm)

10.0 9.5 9.0 8.5 8.0 7.5 7.0 6.5 6.0 5.5 5.0 4.5 4.0 3.5 3.0 2.5 2.0 1.5 1.0 0.5 0.0

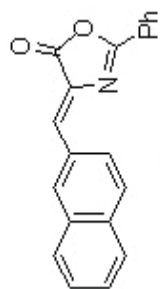

$\text{CDCl}_3$ , 125 MHz

77.30  
77.05  
76.79

125.65  
126.70  
127.82  
127.85  
128.13  
128.39  
128.65  
128.97  
129.16  
131.34  
131.87  
133.16  
133.34  
134.14  
134.45

163.40  
167.72

125.65

126.70

127.82

127.85

128.13

128.39

128.65

128.97

129.16

131.34

131.87

133.16

133.34

134.14

134.45

134.45

134.14

133.34

133.16

131.87

131.34

129.16

128.97

128.65

128.39

128.13

127.85

127.82

126.70

125.65

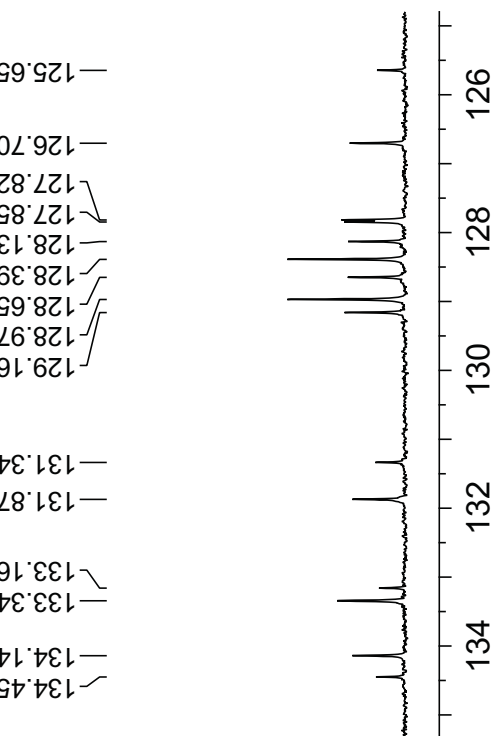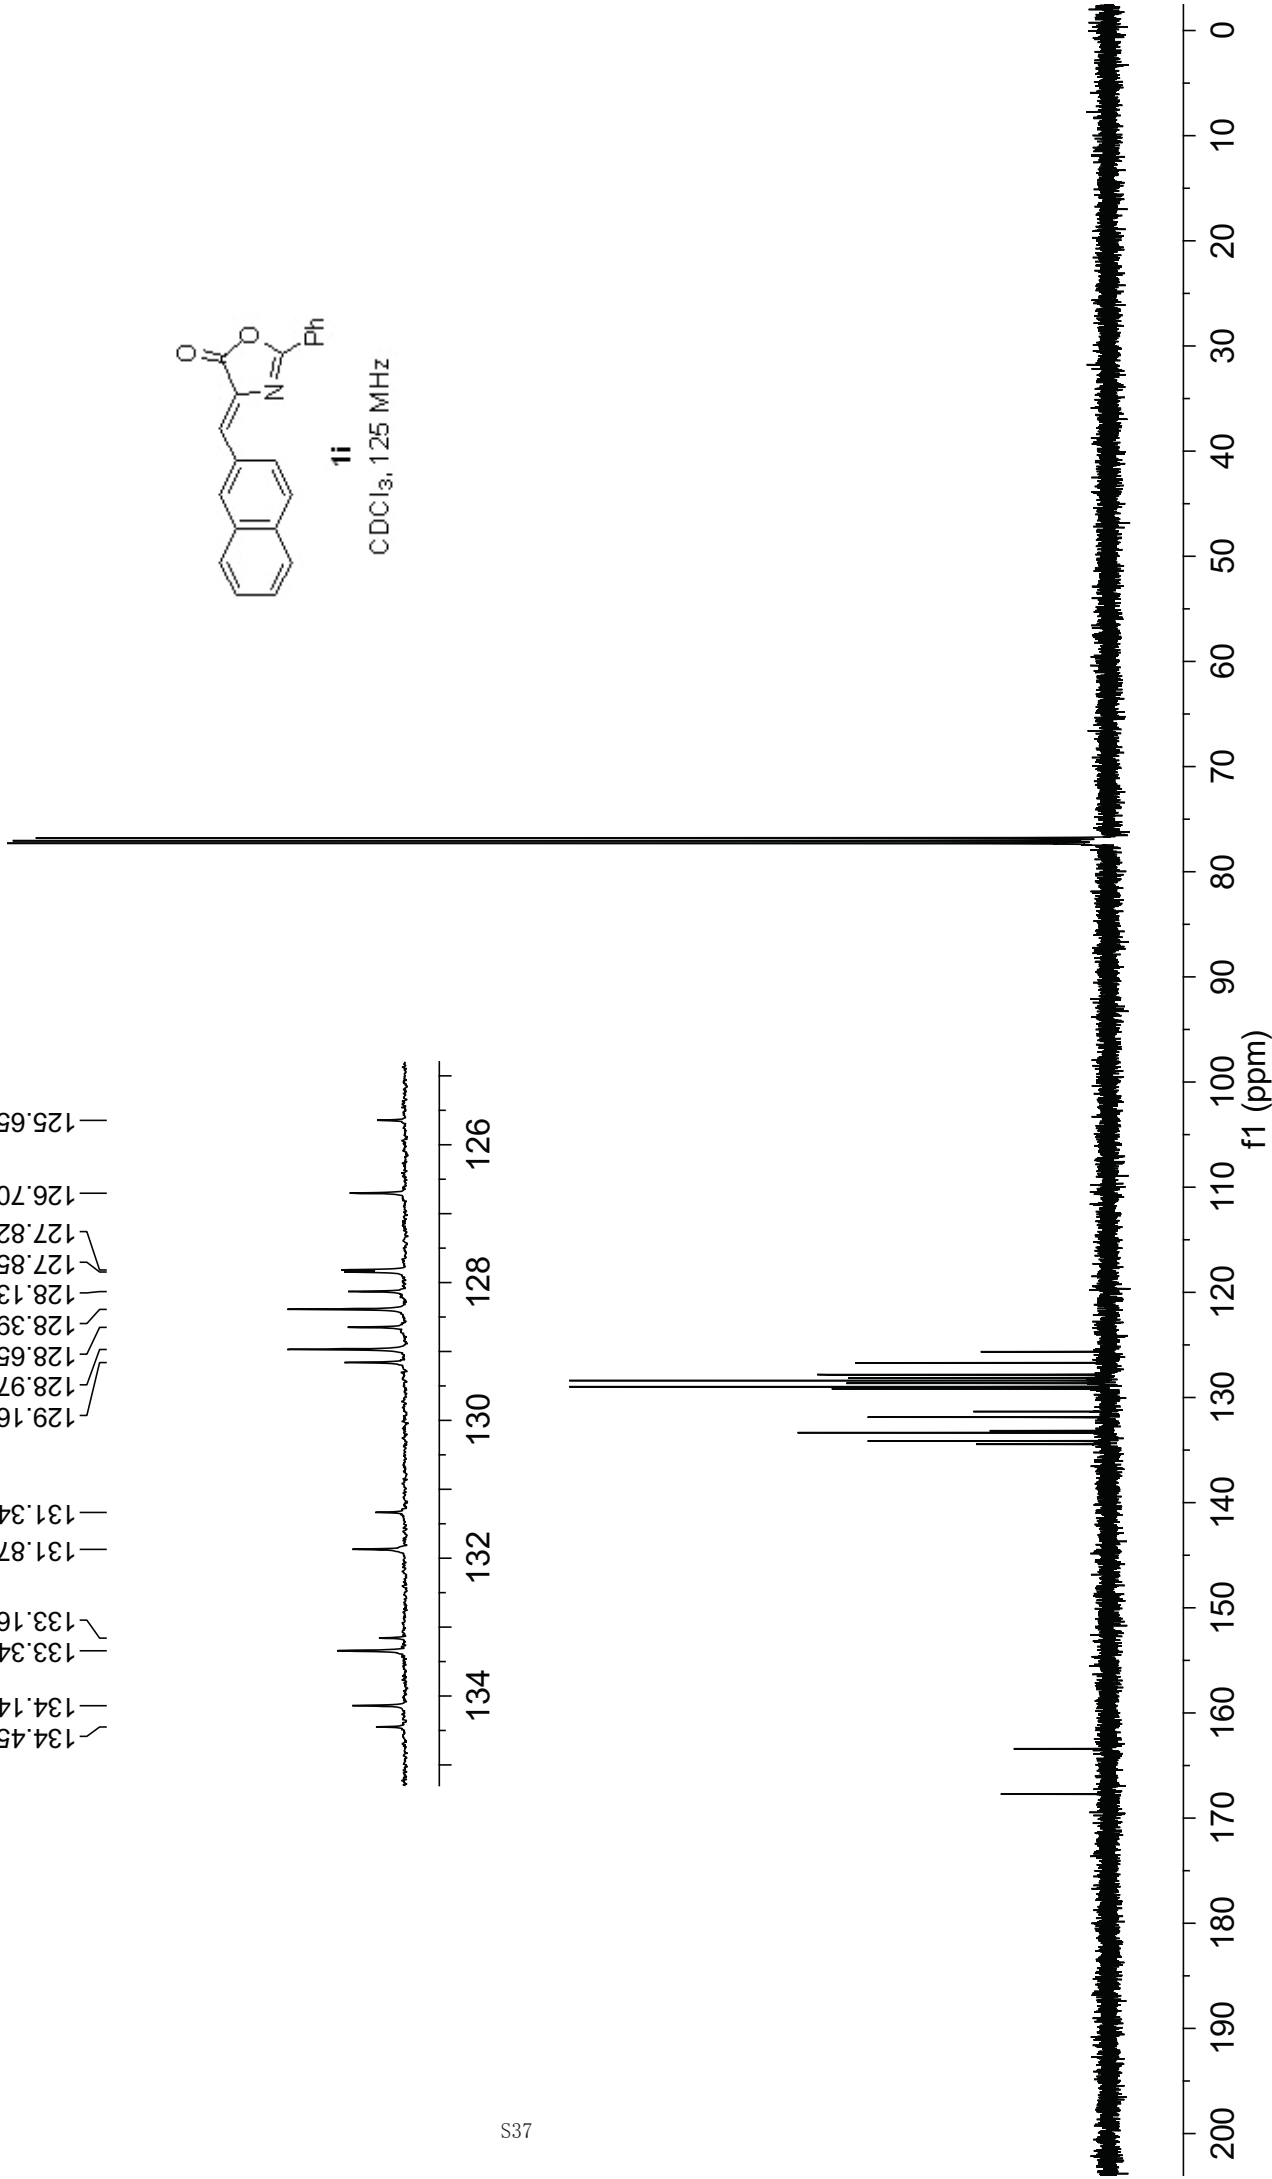

8.6723  
8.2141  
8.1971  
7.7216  
7.6498  
7.5703  
7.2603  
7.1675

8.2758  
8.2600  
8.2141  
8.2033  
8.1998  
8.1971  
7.7191  
7.7062  
7.7036  
7.7012  
7.6843  
7.6819  
7.6796  
7.6670  
7.6546  
7.6522  
7.6498  
7.6086  
7.5929  
7.5861  
7.5772  
7.5703  
7.5553

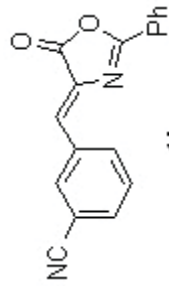

CDCI<sub>3</sub>, 500 MHz

S38

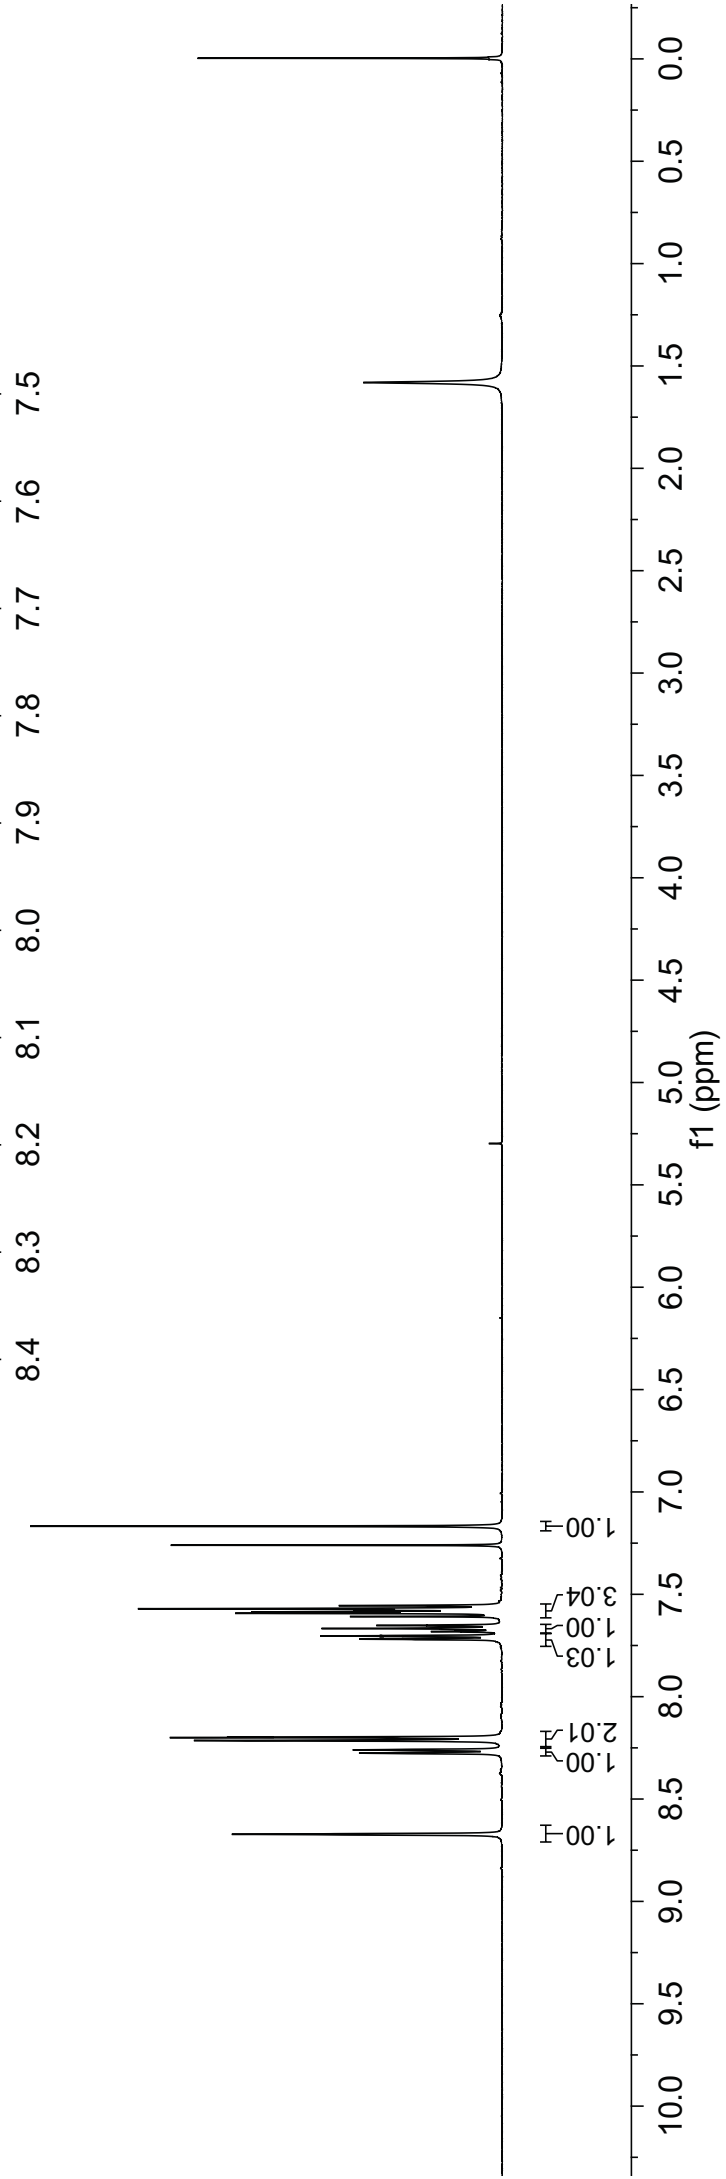

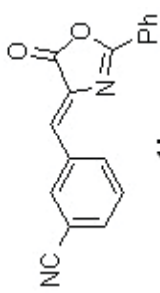

CDCl<sub>3</sub>, 125 MHz

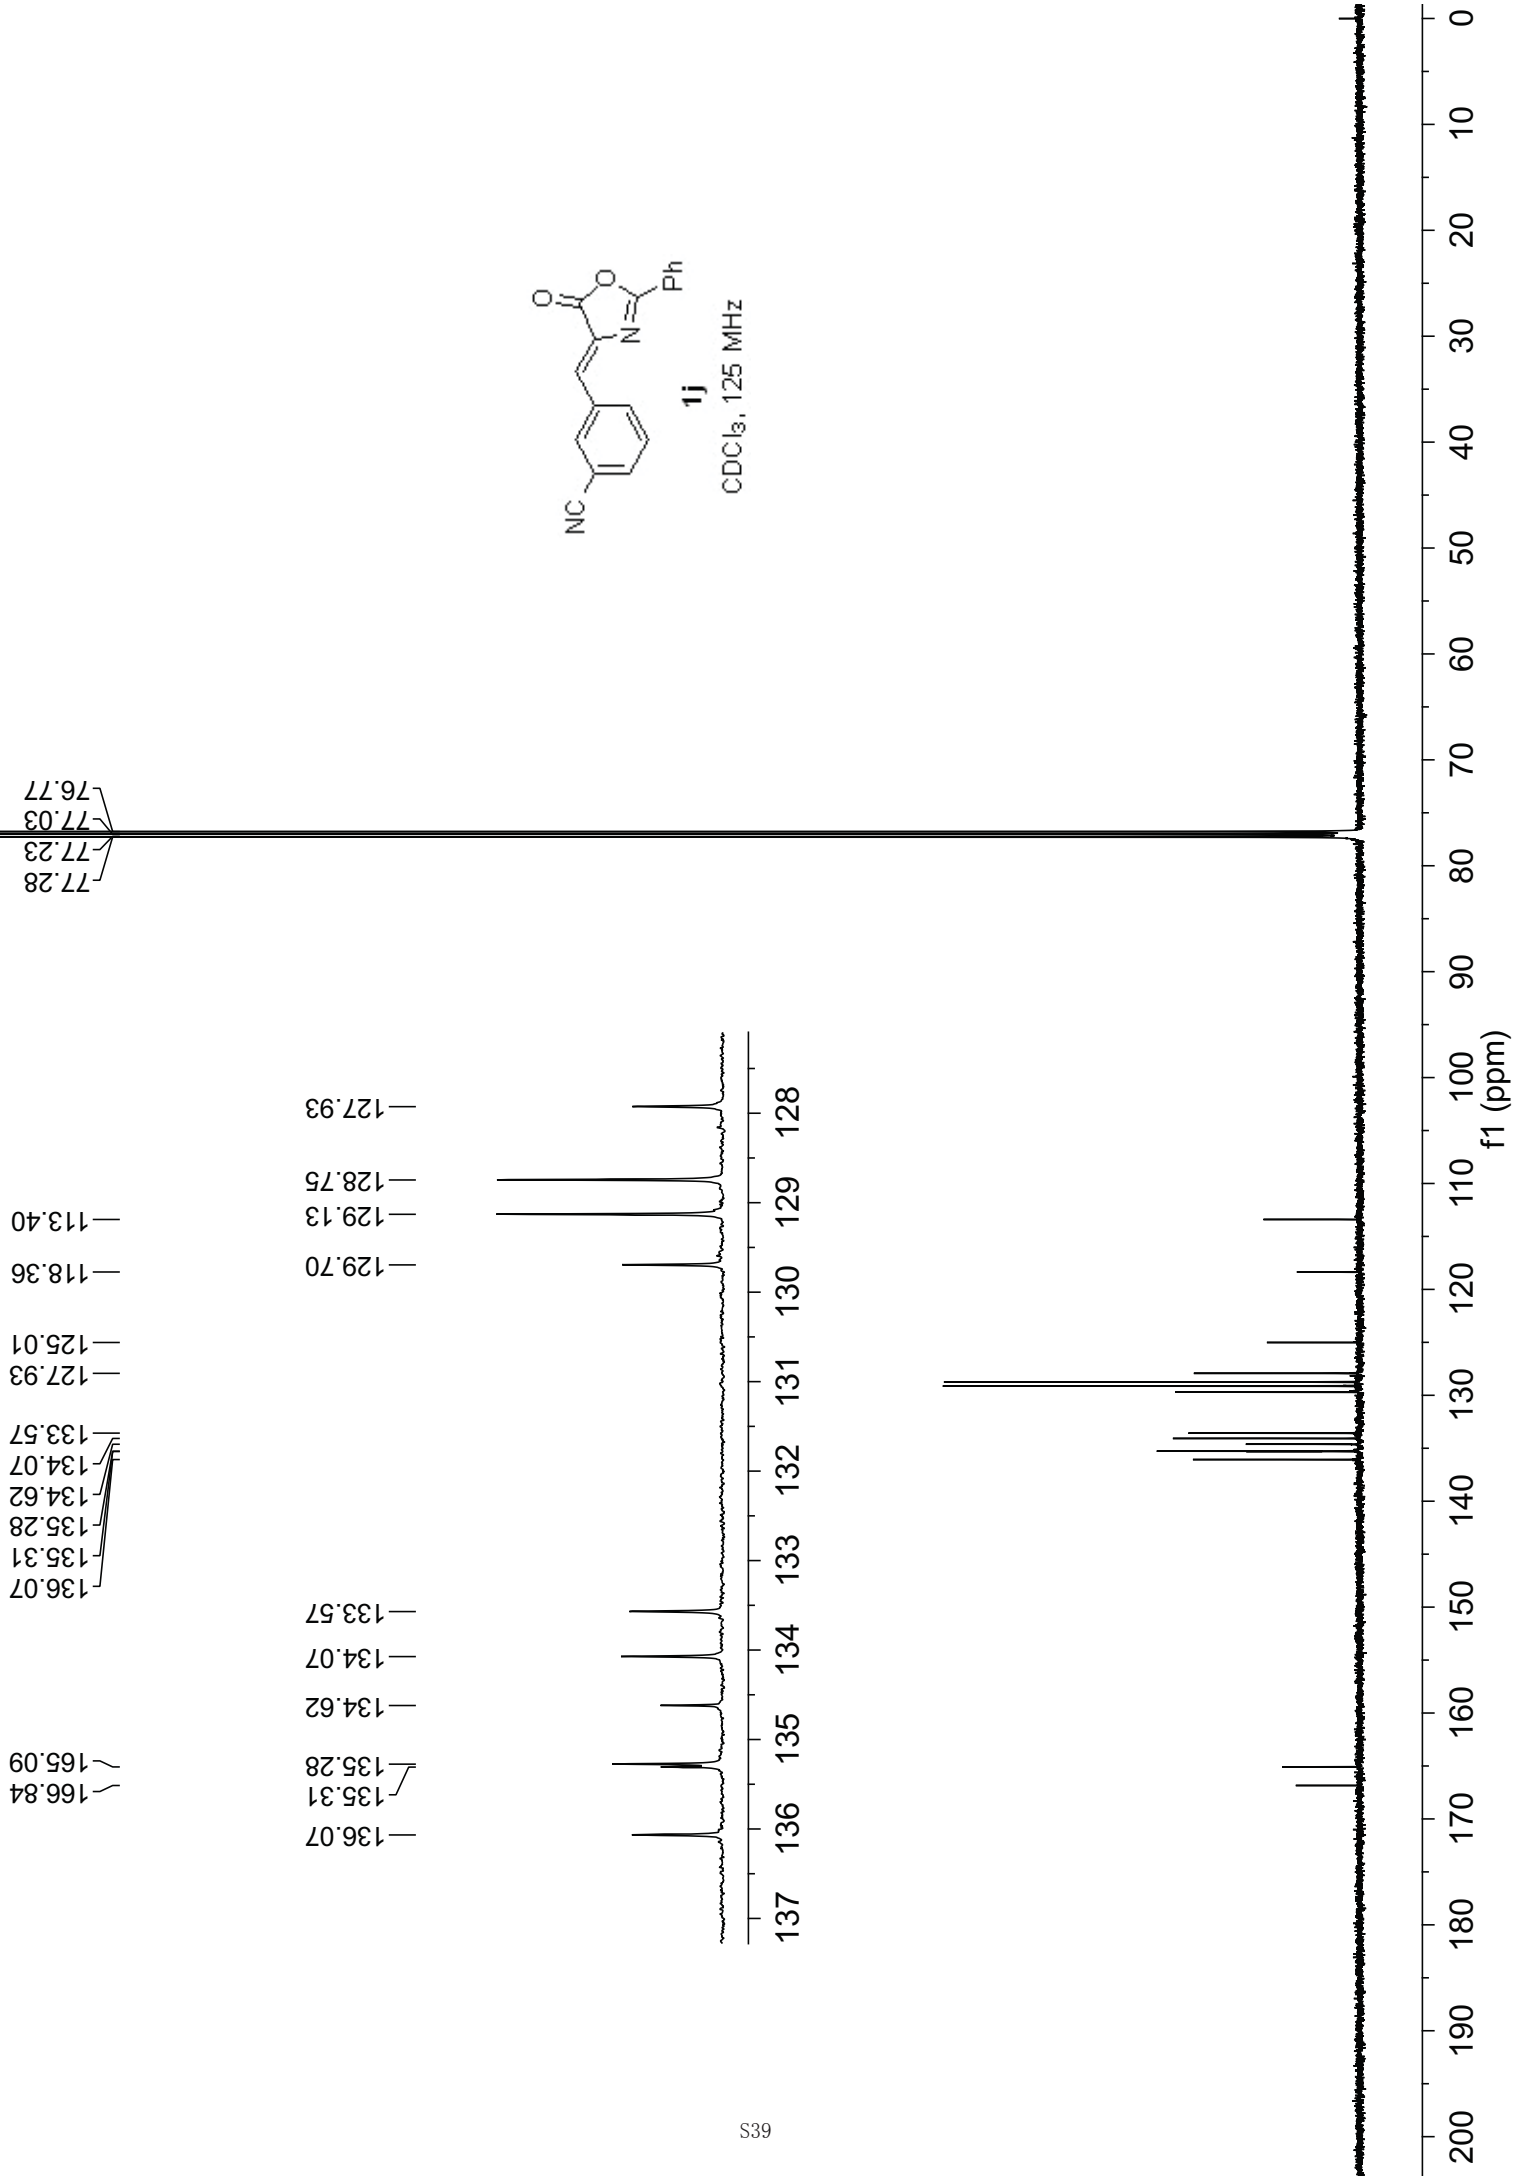

1.5124  
1.4985  
1.4845

4.1534  
4.1394  
4.1255  
4.1115

6.9044  
6.9210  
6.9210  
7.0620  
7.0771  
7.0923

7.5987  
7.8928

8.1672  
8.1745  
8.1846  
8.8700  
8.8736  
8.8859  
8.8893

6.9210  
6.9044

7.0923  
7.0771  
7.0620

7.2603

7.3856  
7.3892  
7.4002  
7.4031  
7.4060  
7.4170  
7.4206

7.5102  
7.5248  
7.5404

7.6133  
7.5987  
7.5839

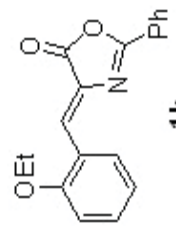

CDCl<sub>3</sub>, 500 MHz

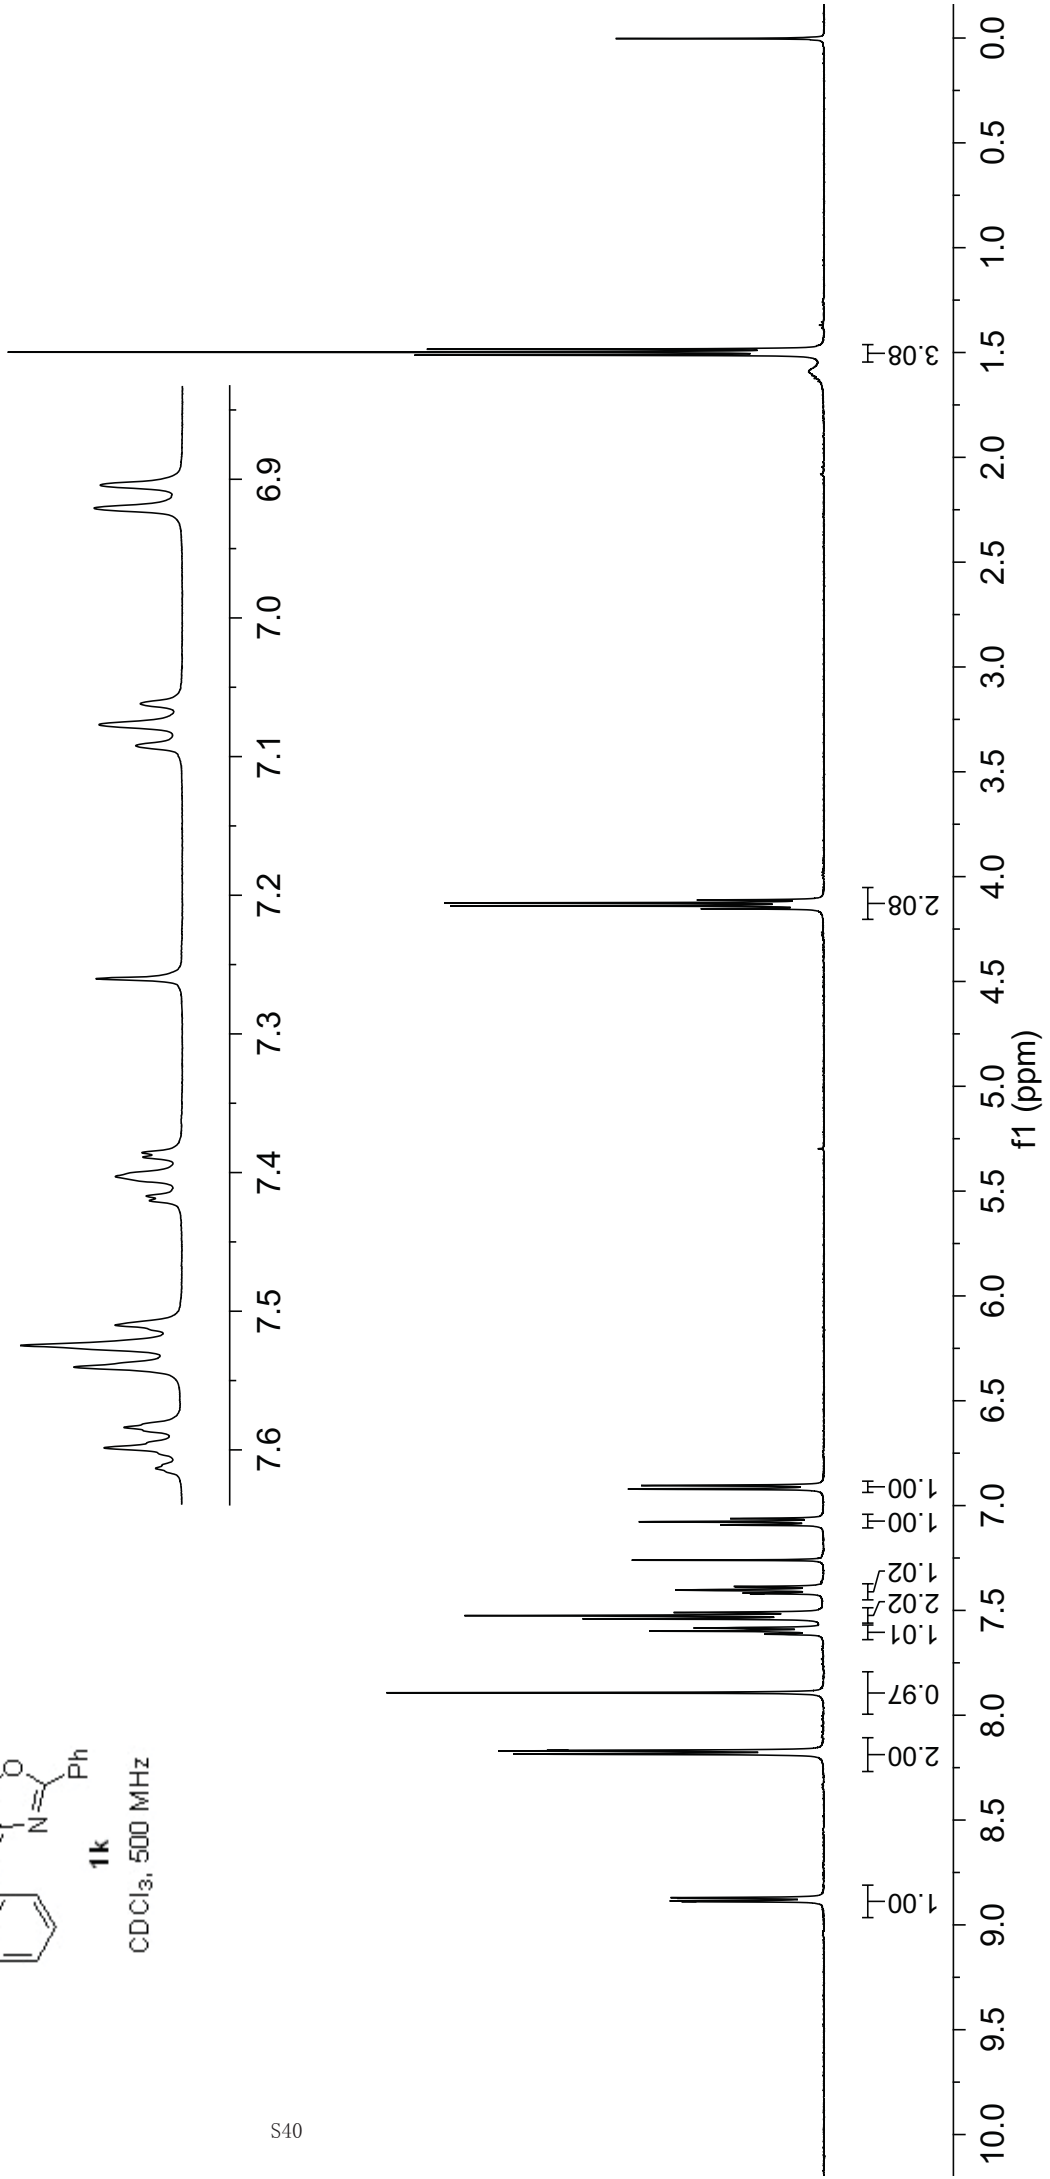



14.81  
64.21  
76.78  
77.03  
77.28  
111.65  
120.82  
122.69  
125.84  
128.25  
128.25  
128.90  
128.90  
132.35  
132.98  
133.00  
133.07  
158.75  
162.90  
167.92

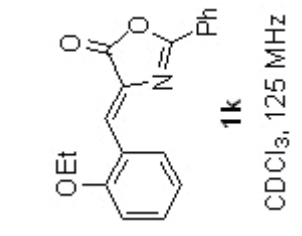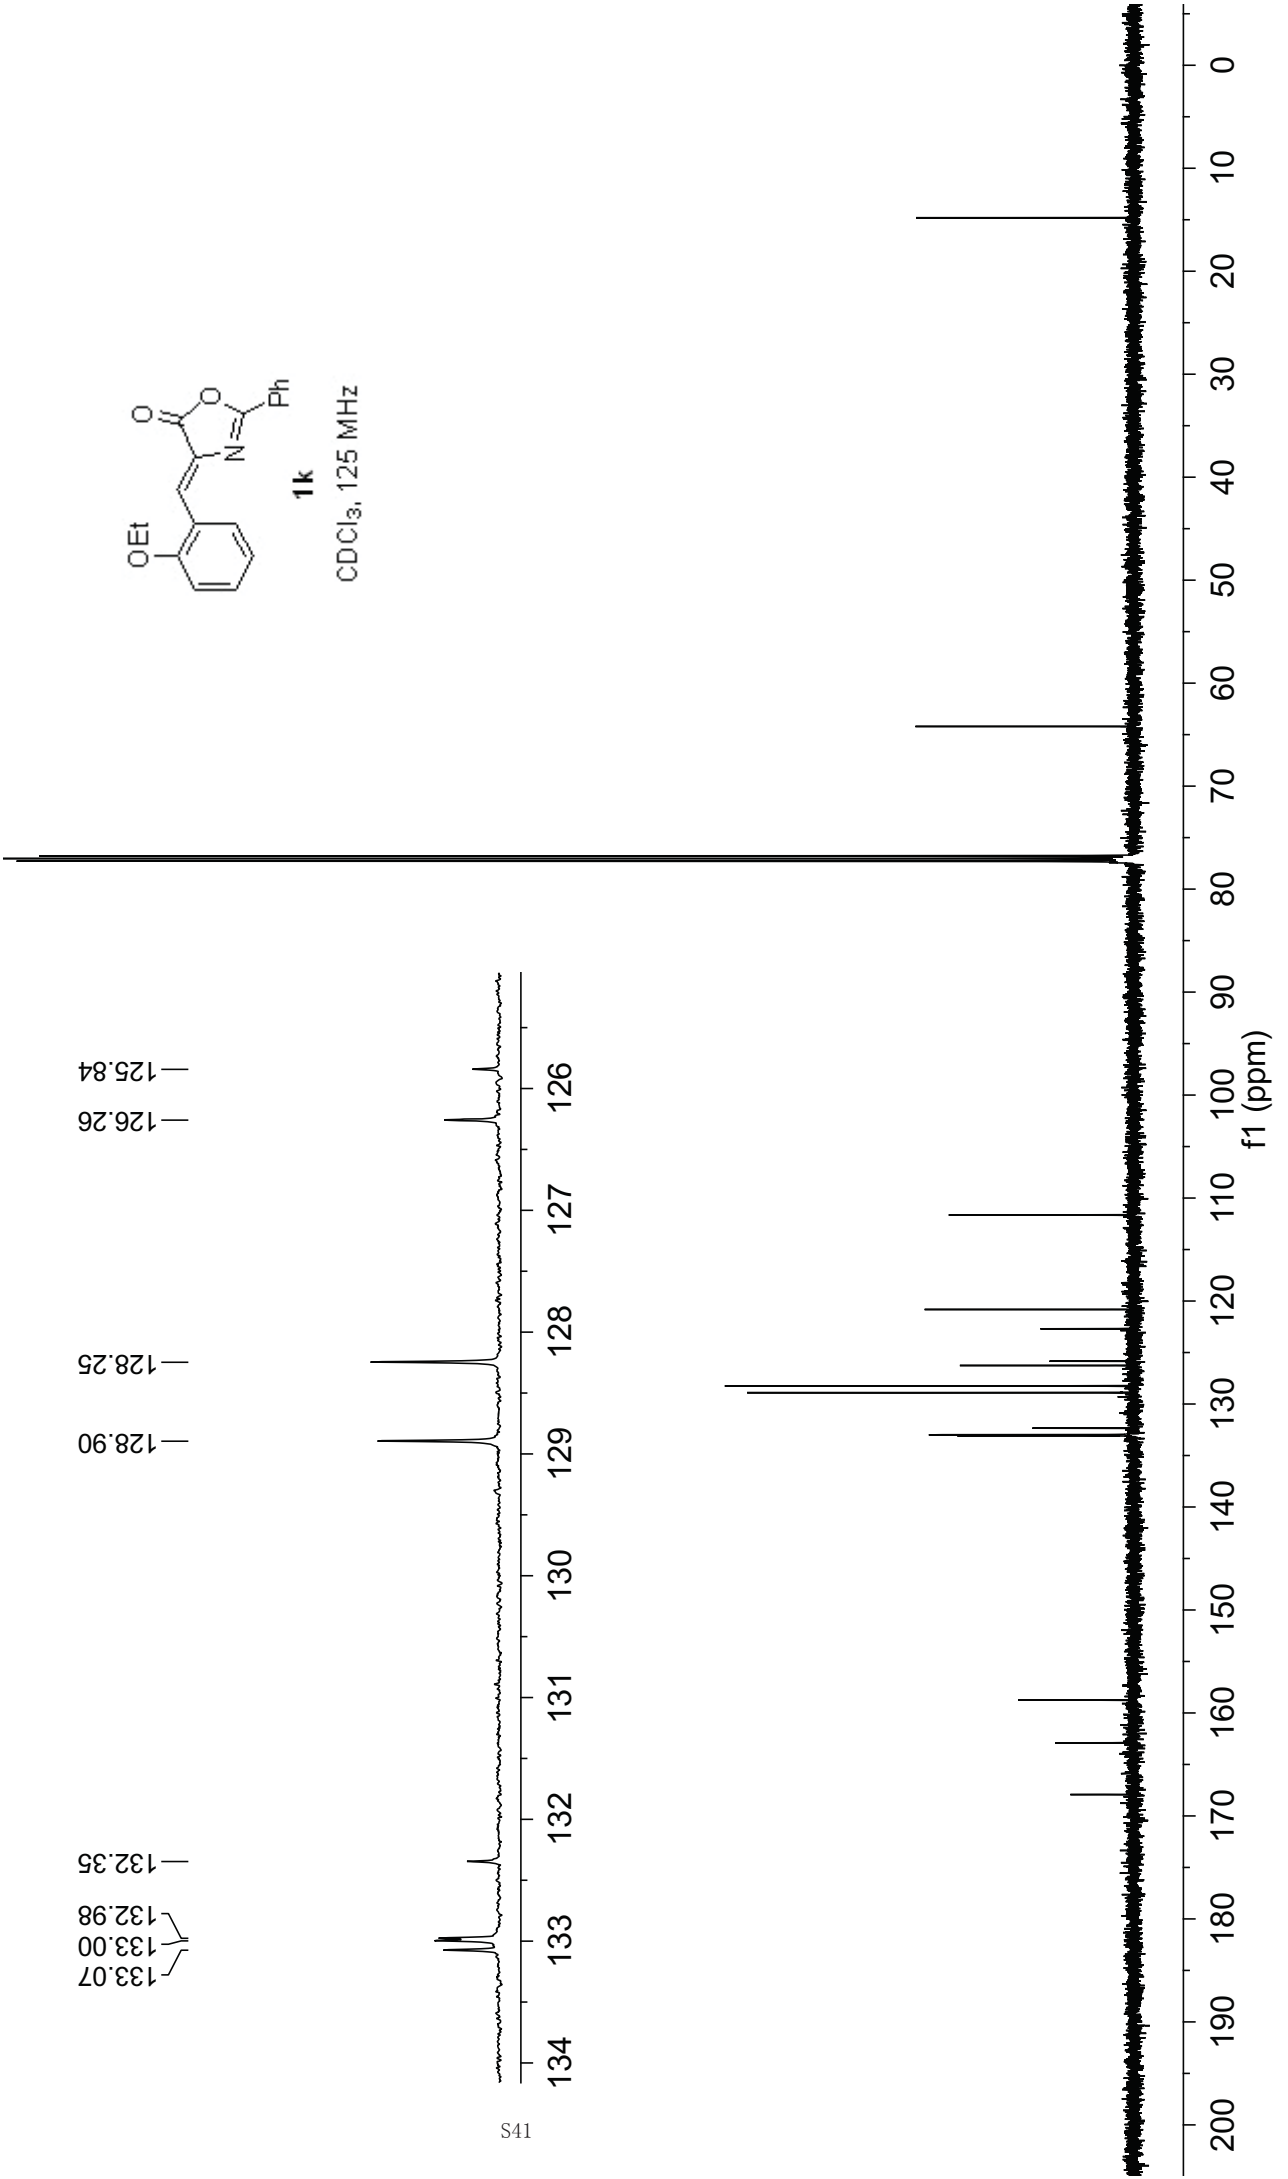

8.9068  
8.8914  
8.8766  
8.1946  
8.1797  
7.6463  
7.6315  
7.6168  
7.5779  
7.5580  
7.5425  
7.5274  
7.4611  
7.4583  
7.4463  
7.4314  
7.4194  
7.4167  
7.3141  
7.2989  
7.2836  
7.2603  
7.1520  
7.1331  
7.1149

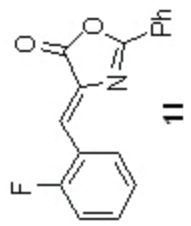

CDCl<sub>3</sub>, 500 MHz

7.6463  
7.6315  
7.6168  
7.5779  
7.5580  
7.5425  
7.5274  
7.4611  
7.4583  
7.4463  
7.4314  
7.4194  
7.4167  
7.3141  
7.2989  
7.2836  
7.2603  
7.1520  
7.1331  
7.1149

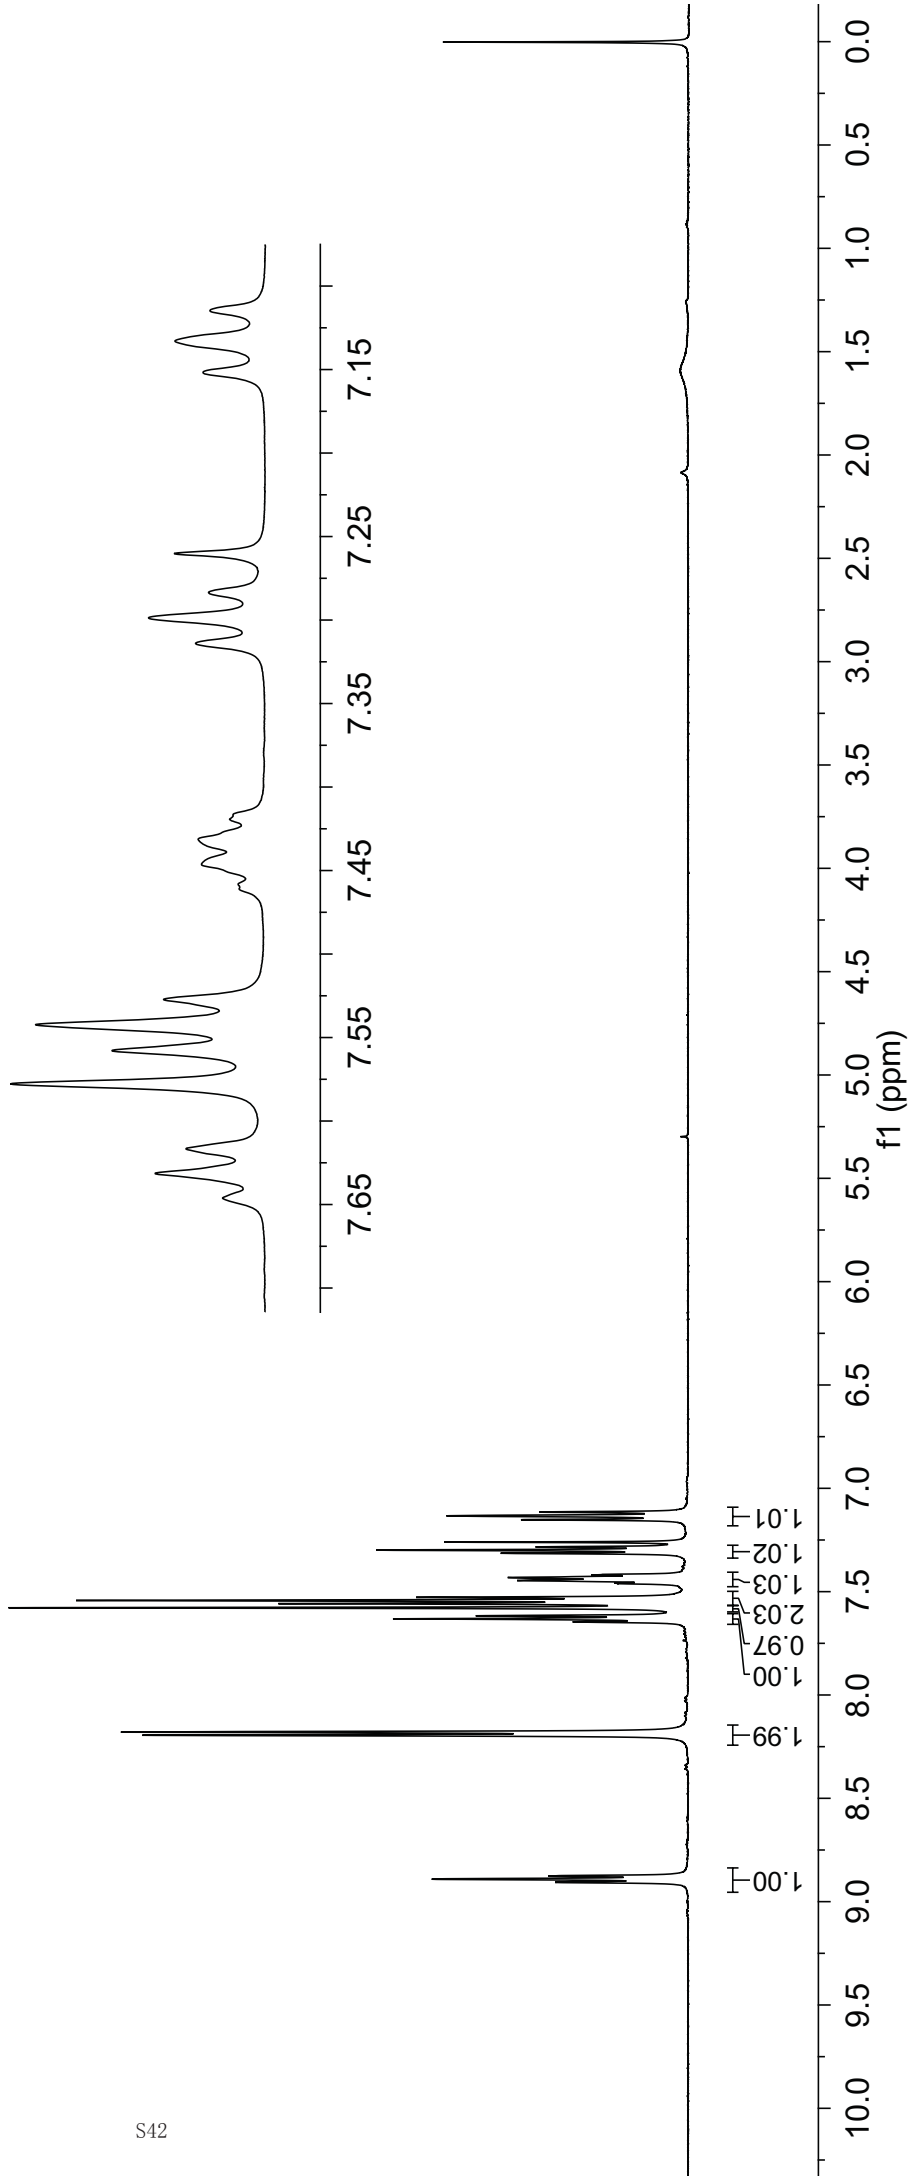

-113.97  
-113.98  
-113.99  
-114.01  
-114.02

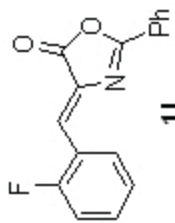

11

$\text{CDCl}_3$ , 470 MHz

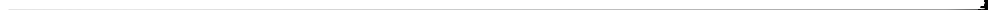

0 -10 -20 -30 -40 -50 -60 -70 -80 -90 -100 -110 -120 -130 -140 -150 -160 -170 -180 -190 -200

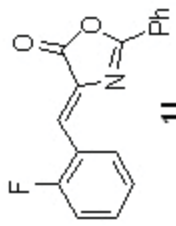

CDCl<sub>3</sub>, 125 MHz

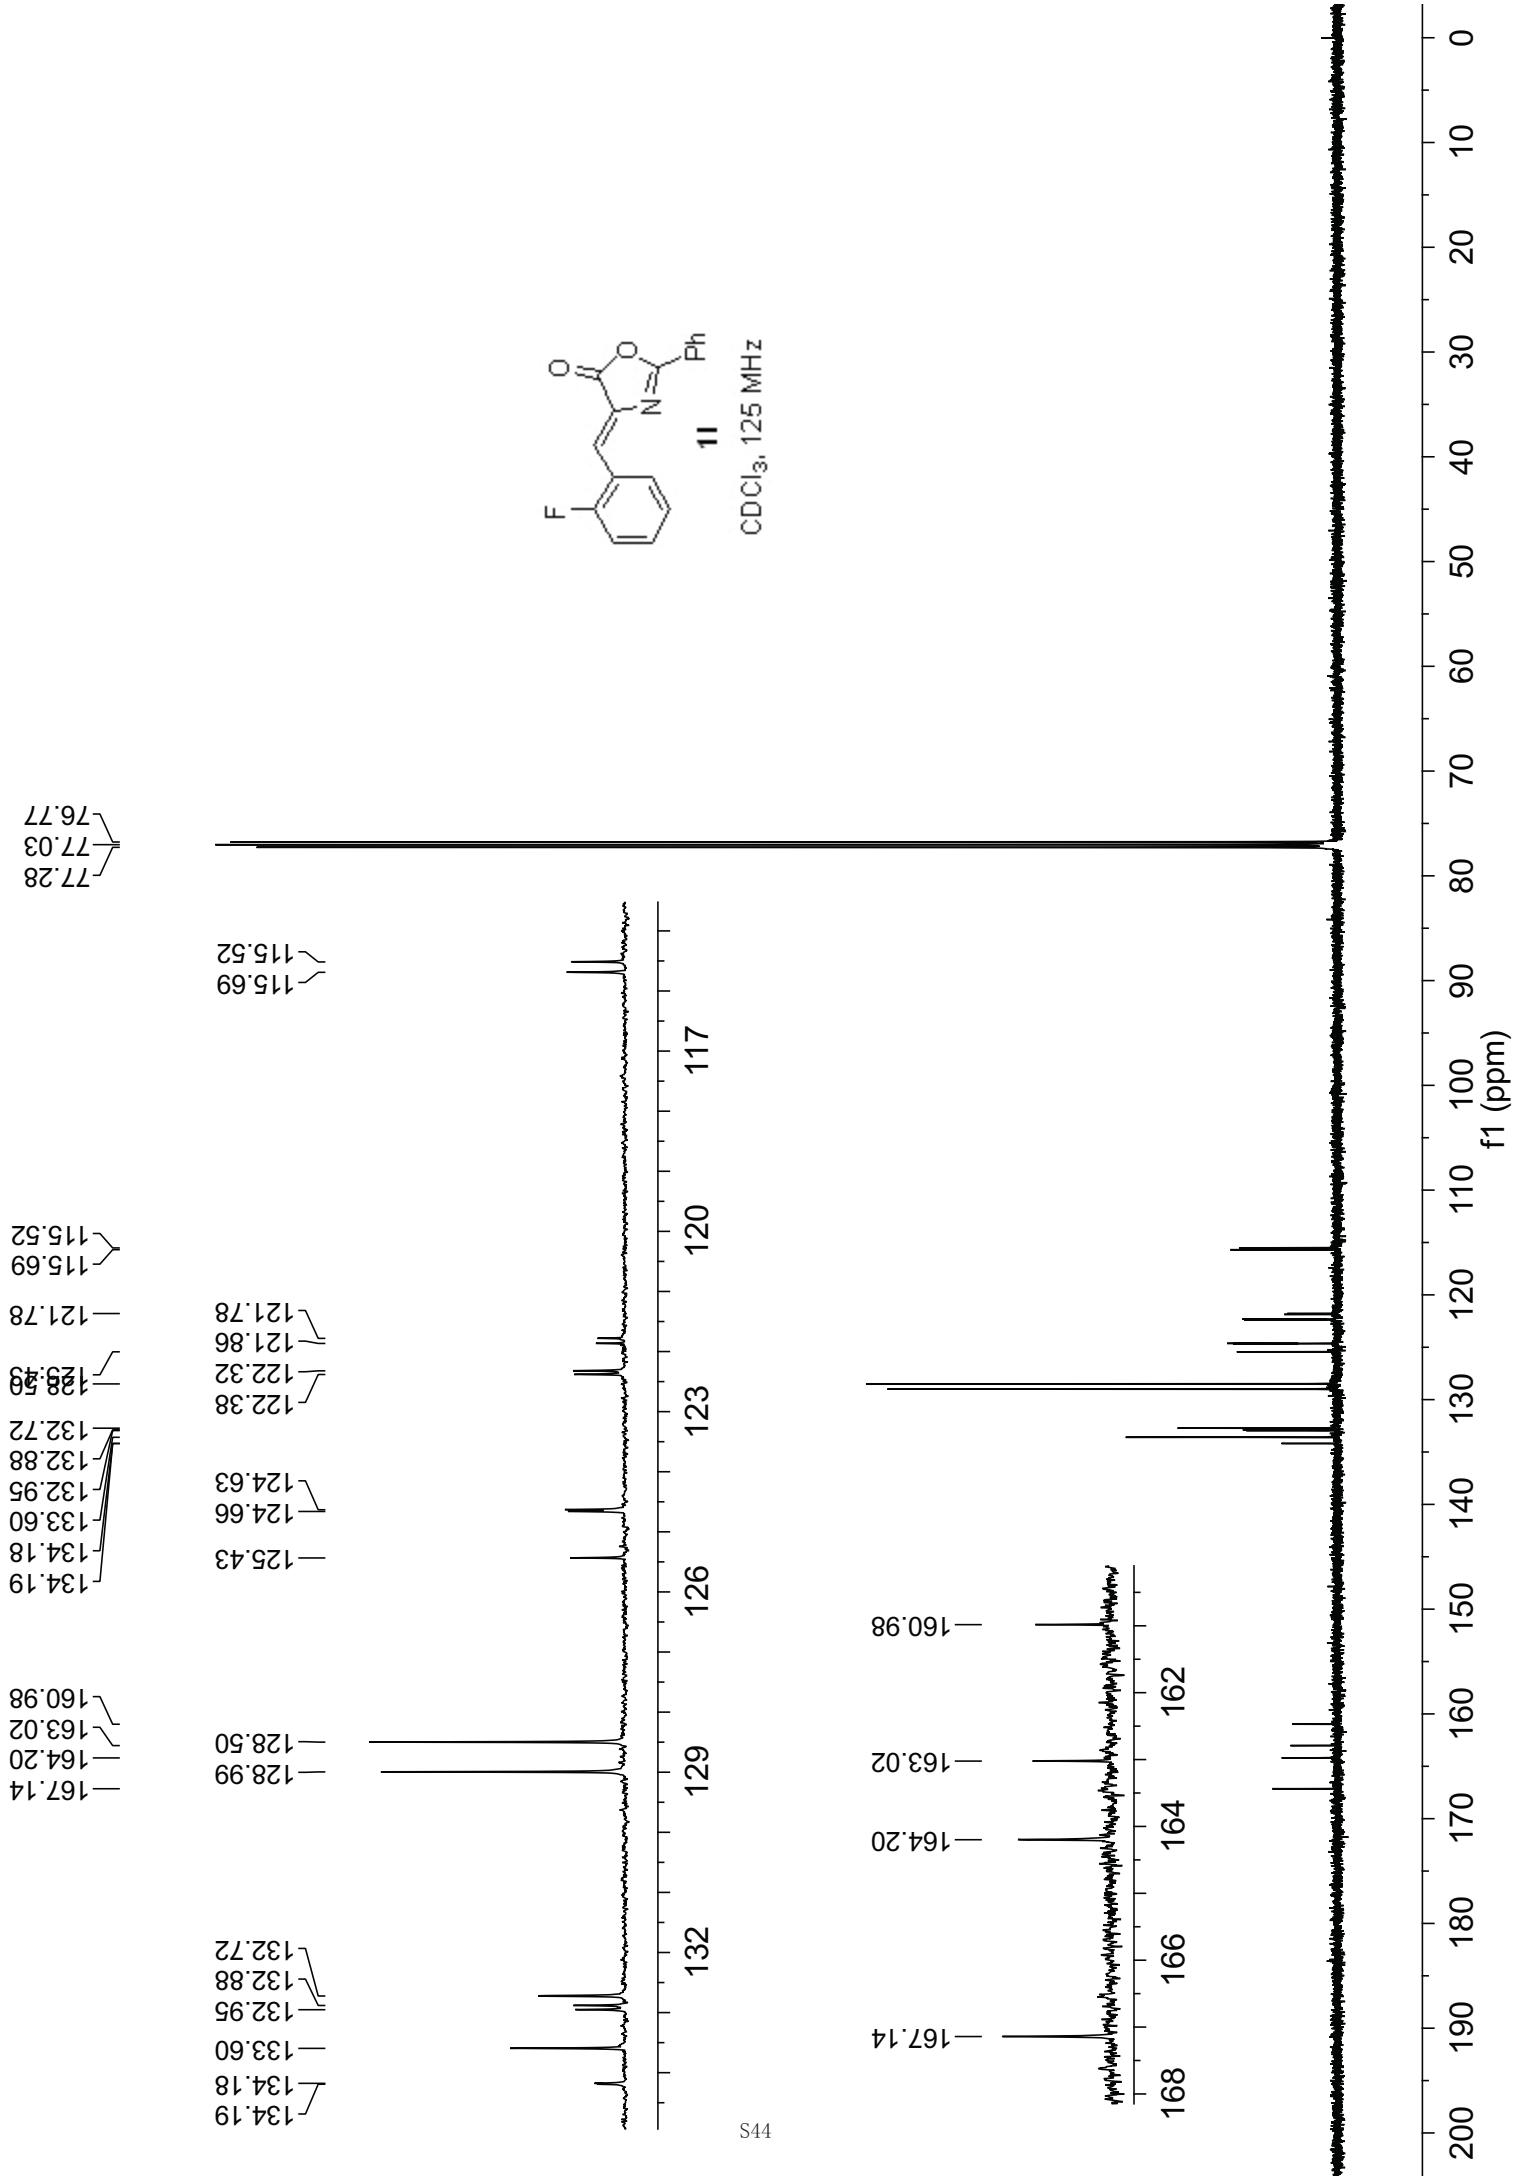

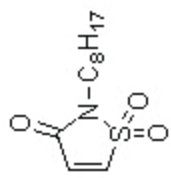

2h

CDCl<sub>3</sub>, 500 MHz

1.7943  
1.7793  
1.7647  
1.7497  
1.7347  
1.3602  
1.2626  
0.8904  
0.8767  
0.8625

3.6562  
3.6412  
3.6261

7.3813  
7.3669  
7.2600  
6.7787  
6.7645

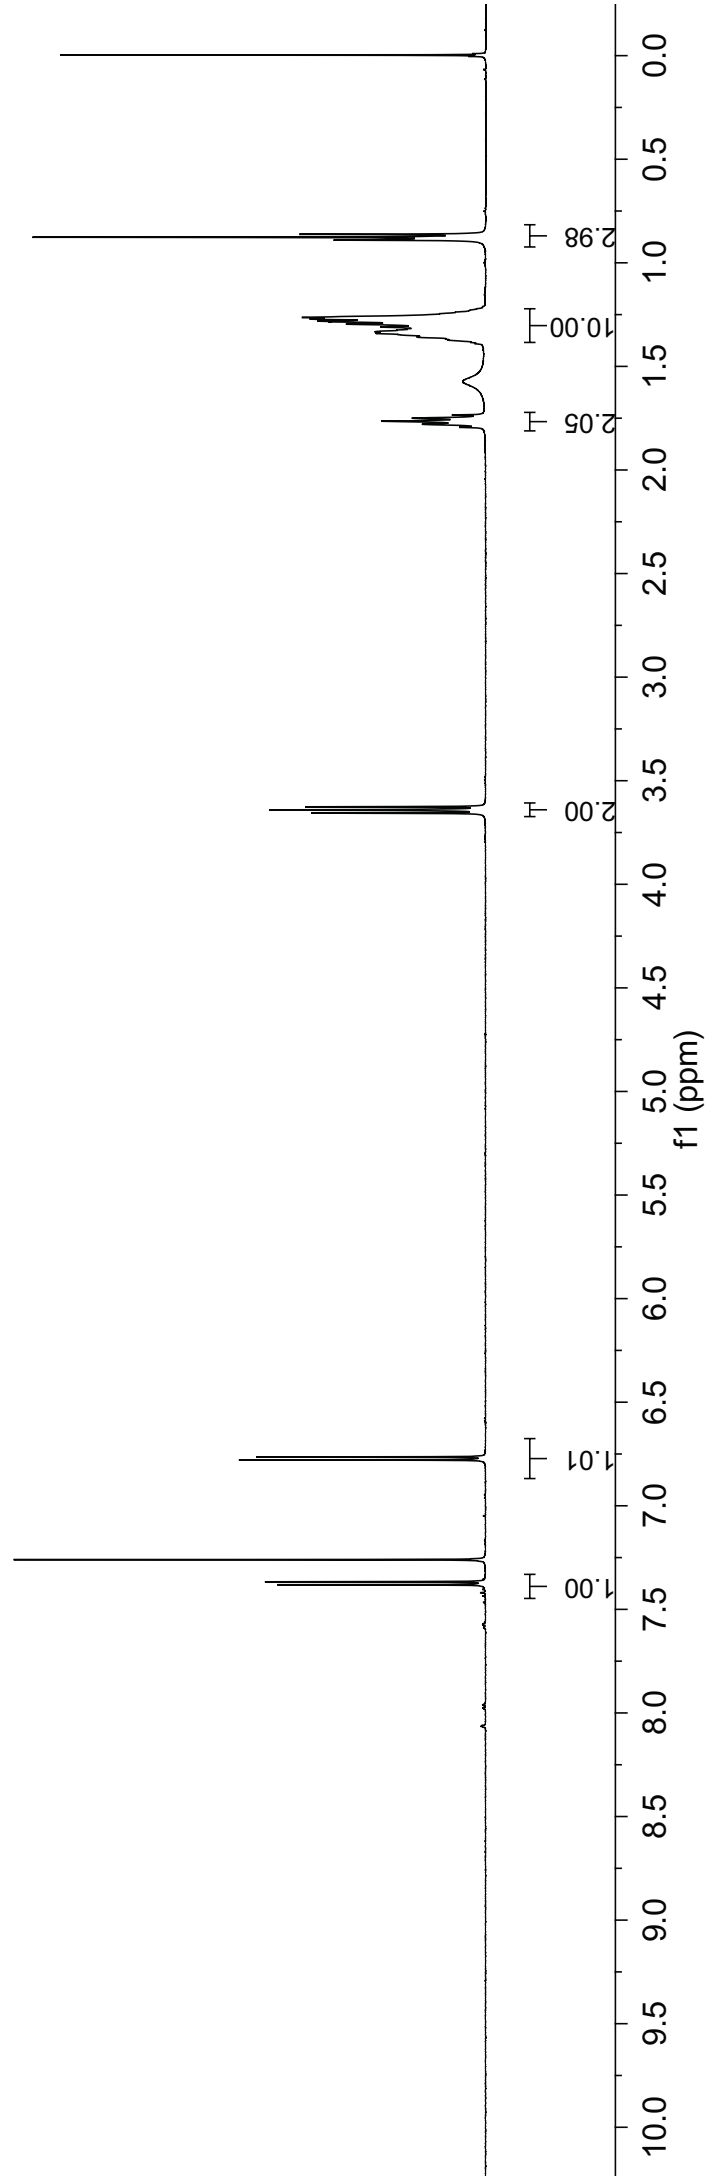

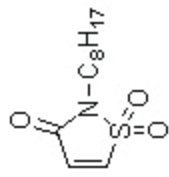

2h

CDCl<sub>3</sub>, 125 MHz

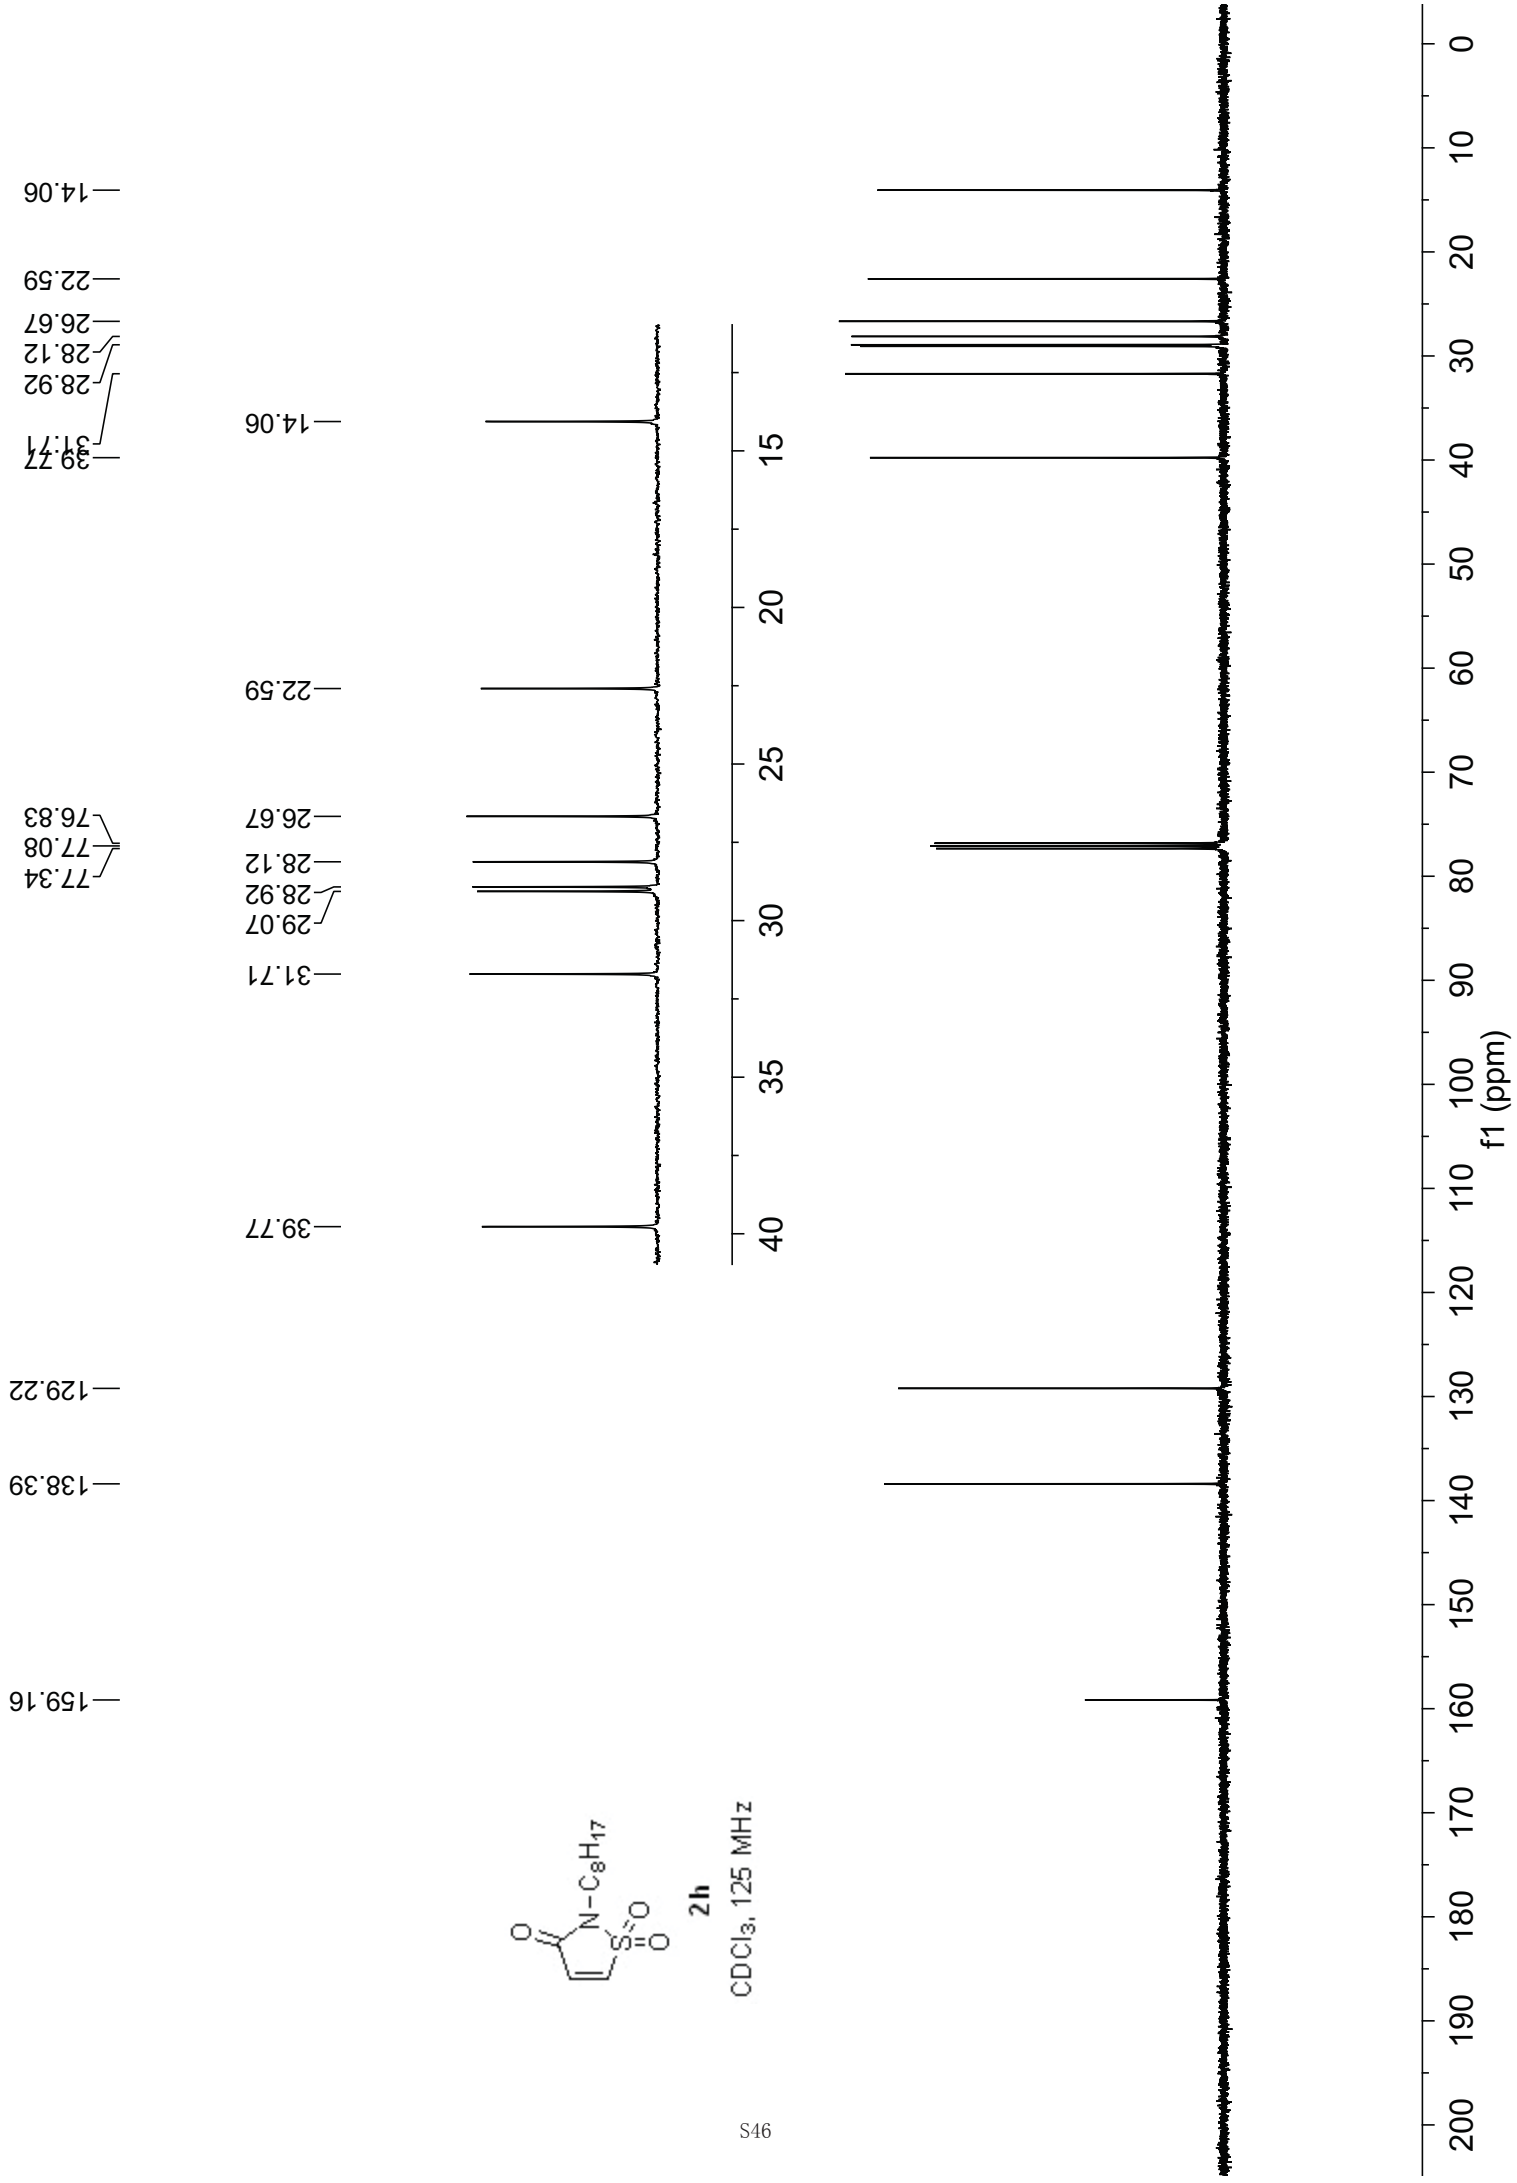

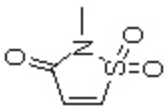

21

CDCl<sub>3</sub>, 500 MHz

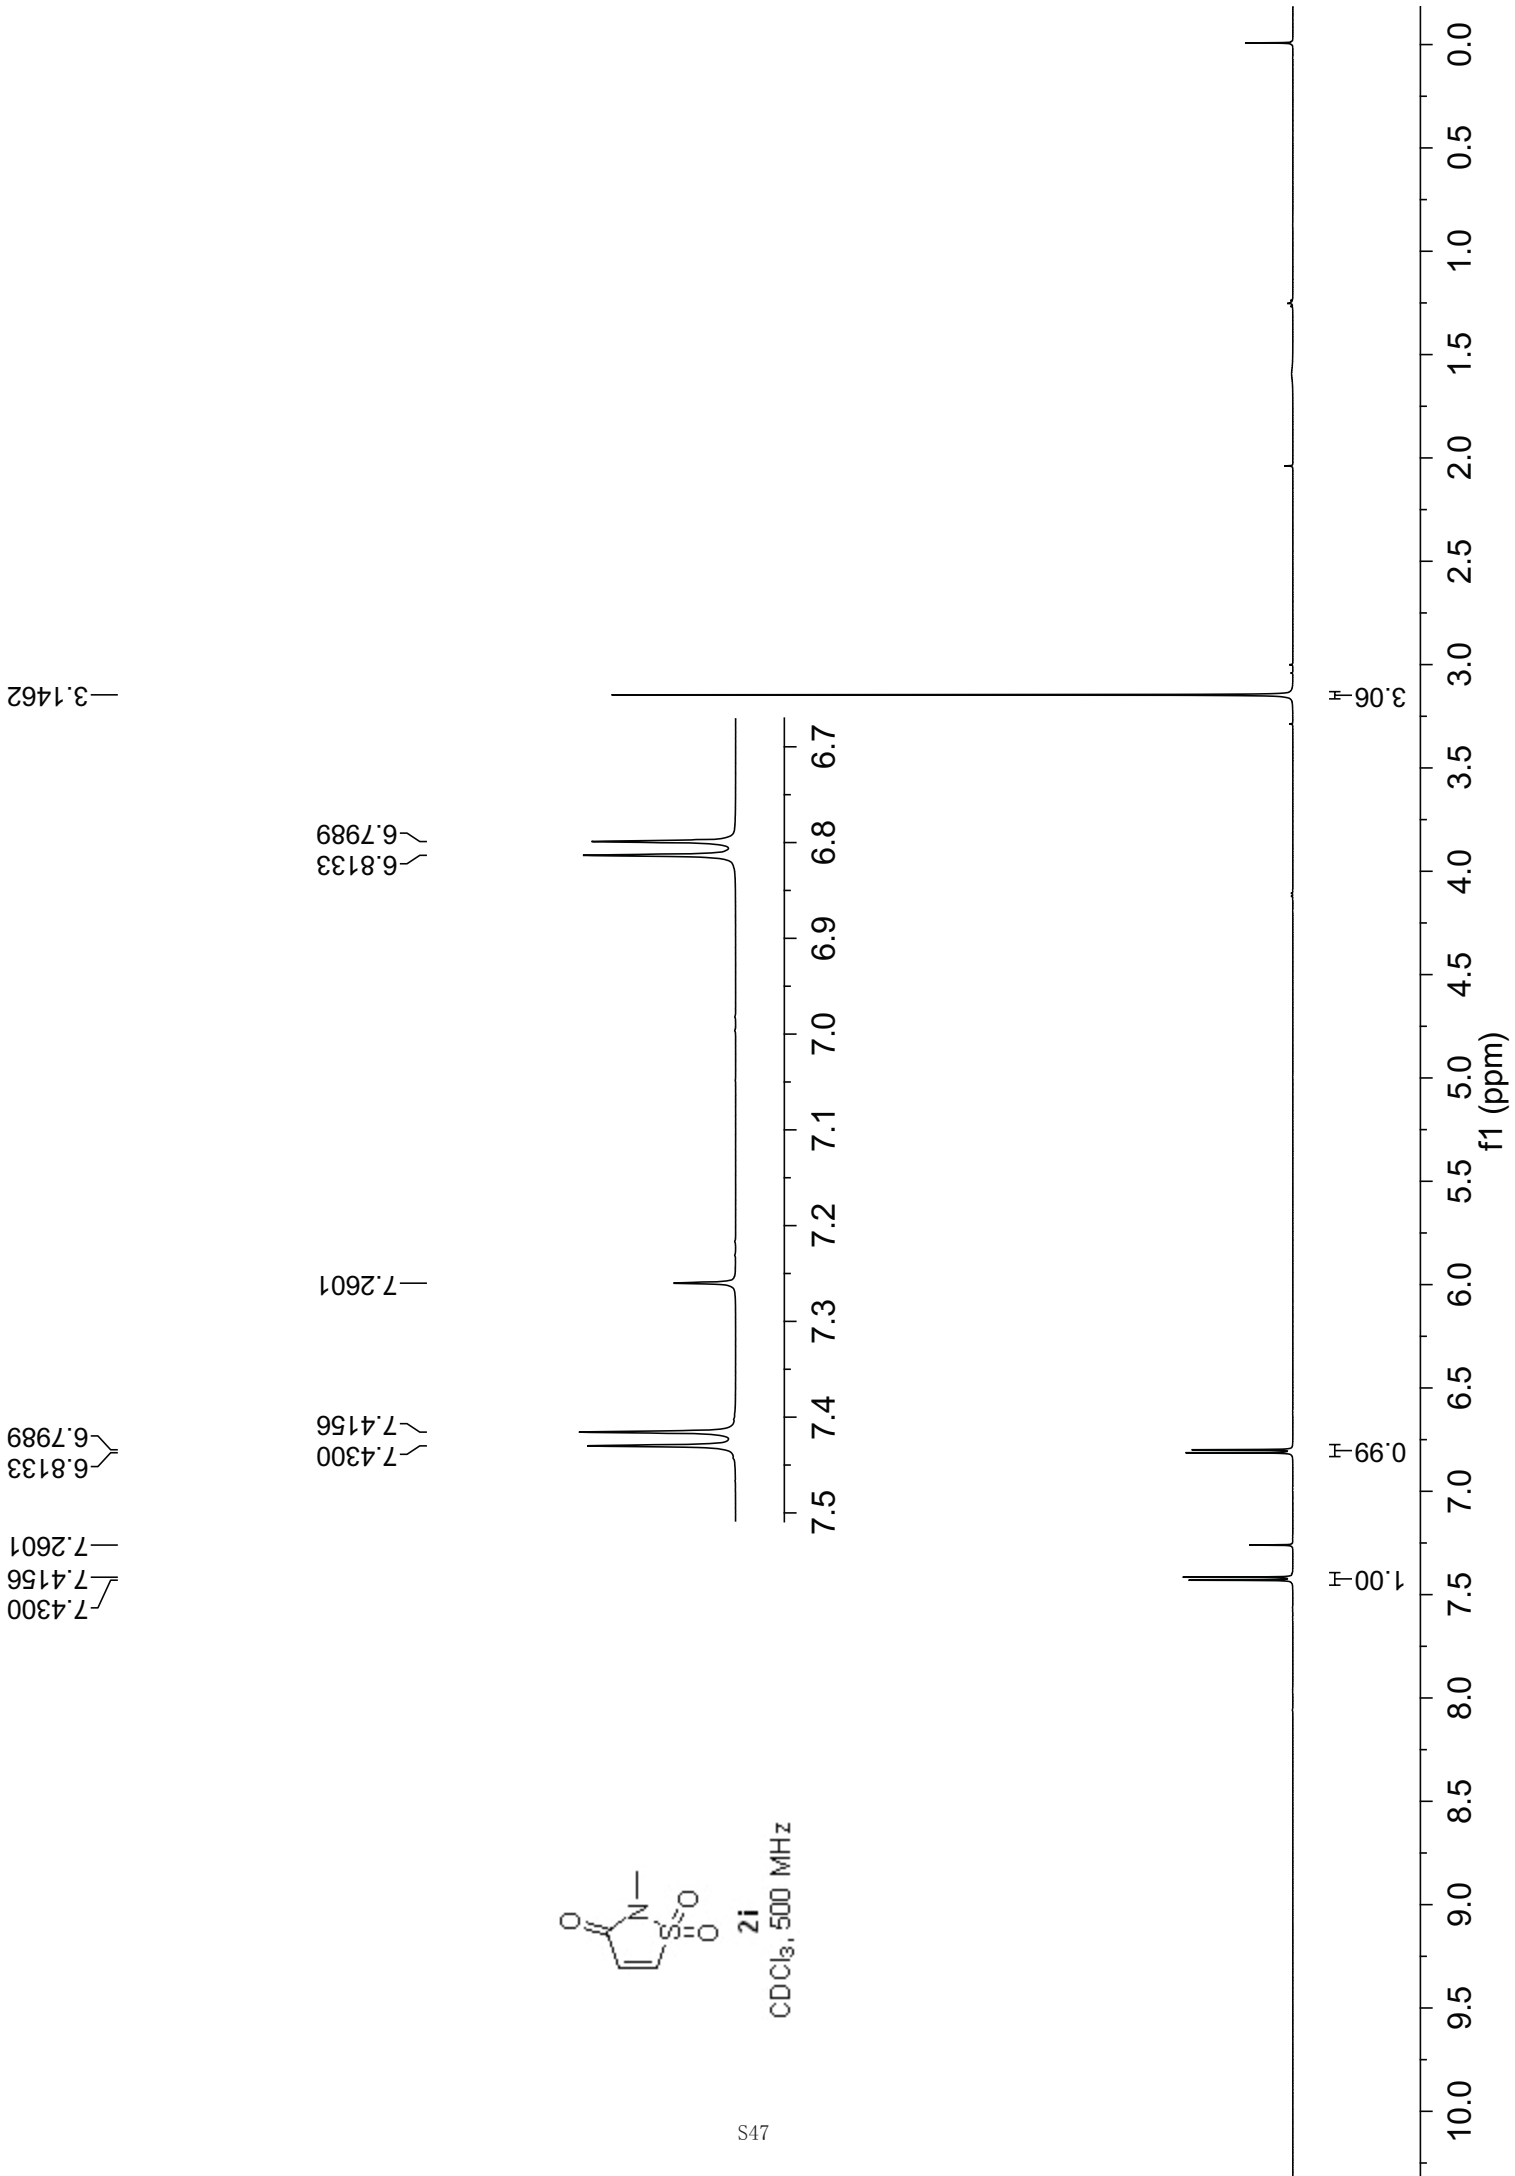

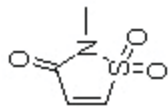

Zi

CDCl<sub>3</sub>, 125 MHz

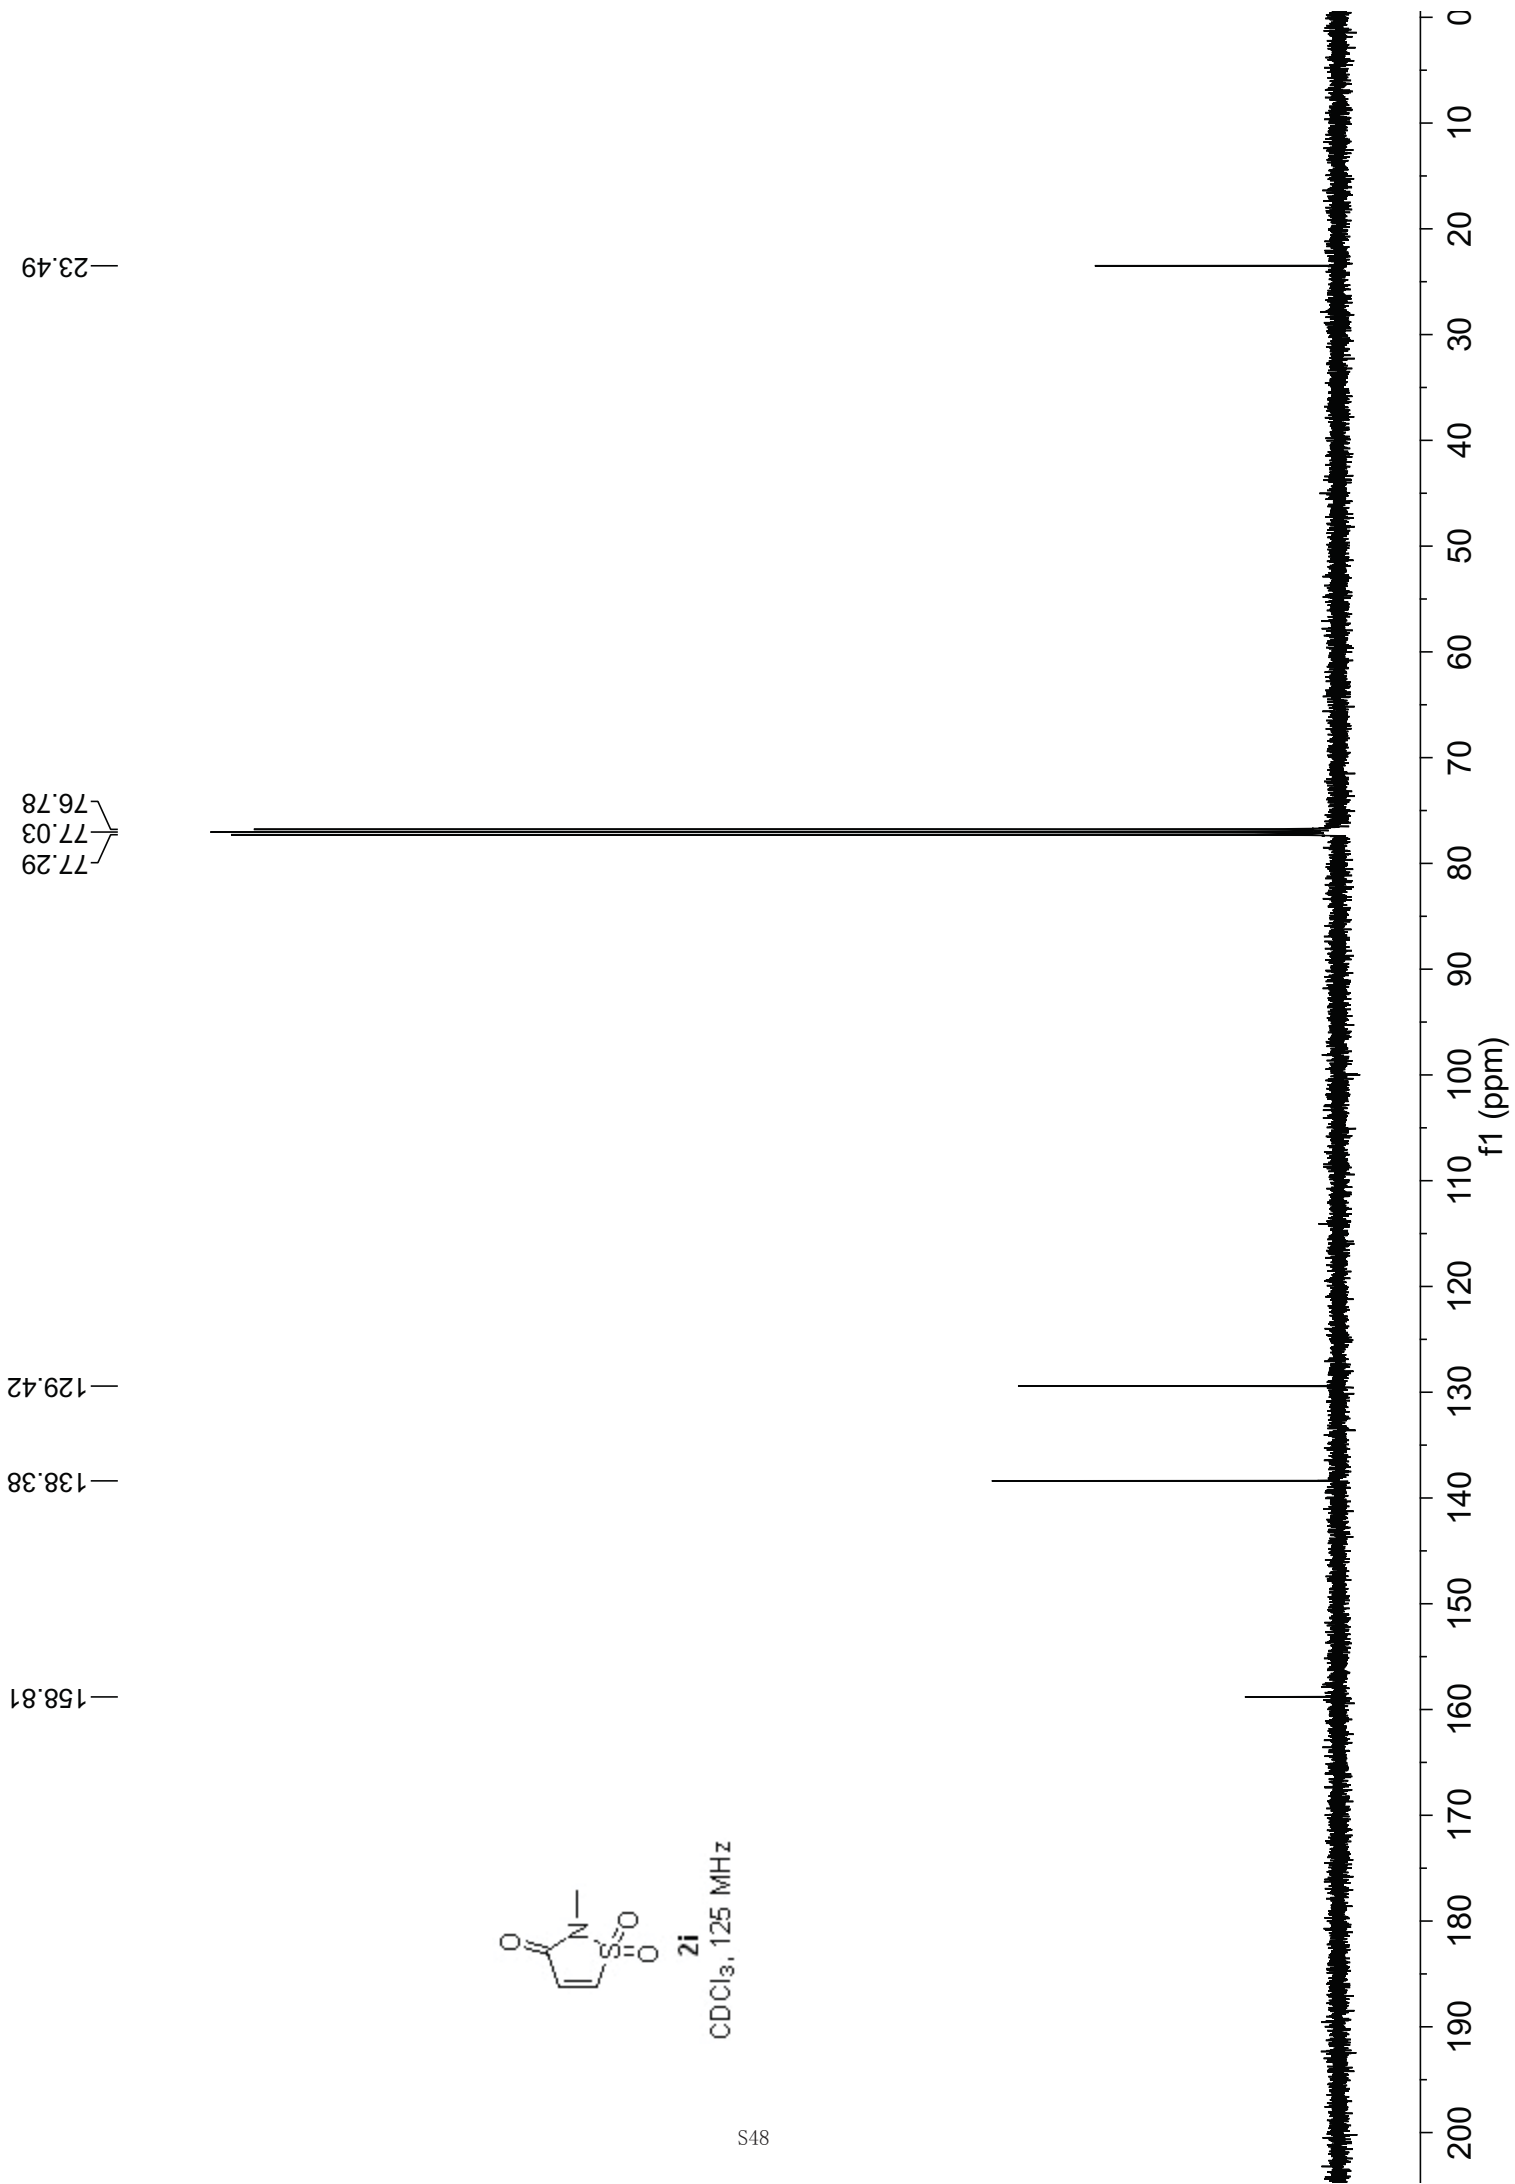



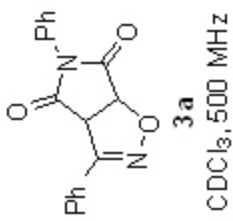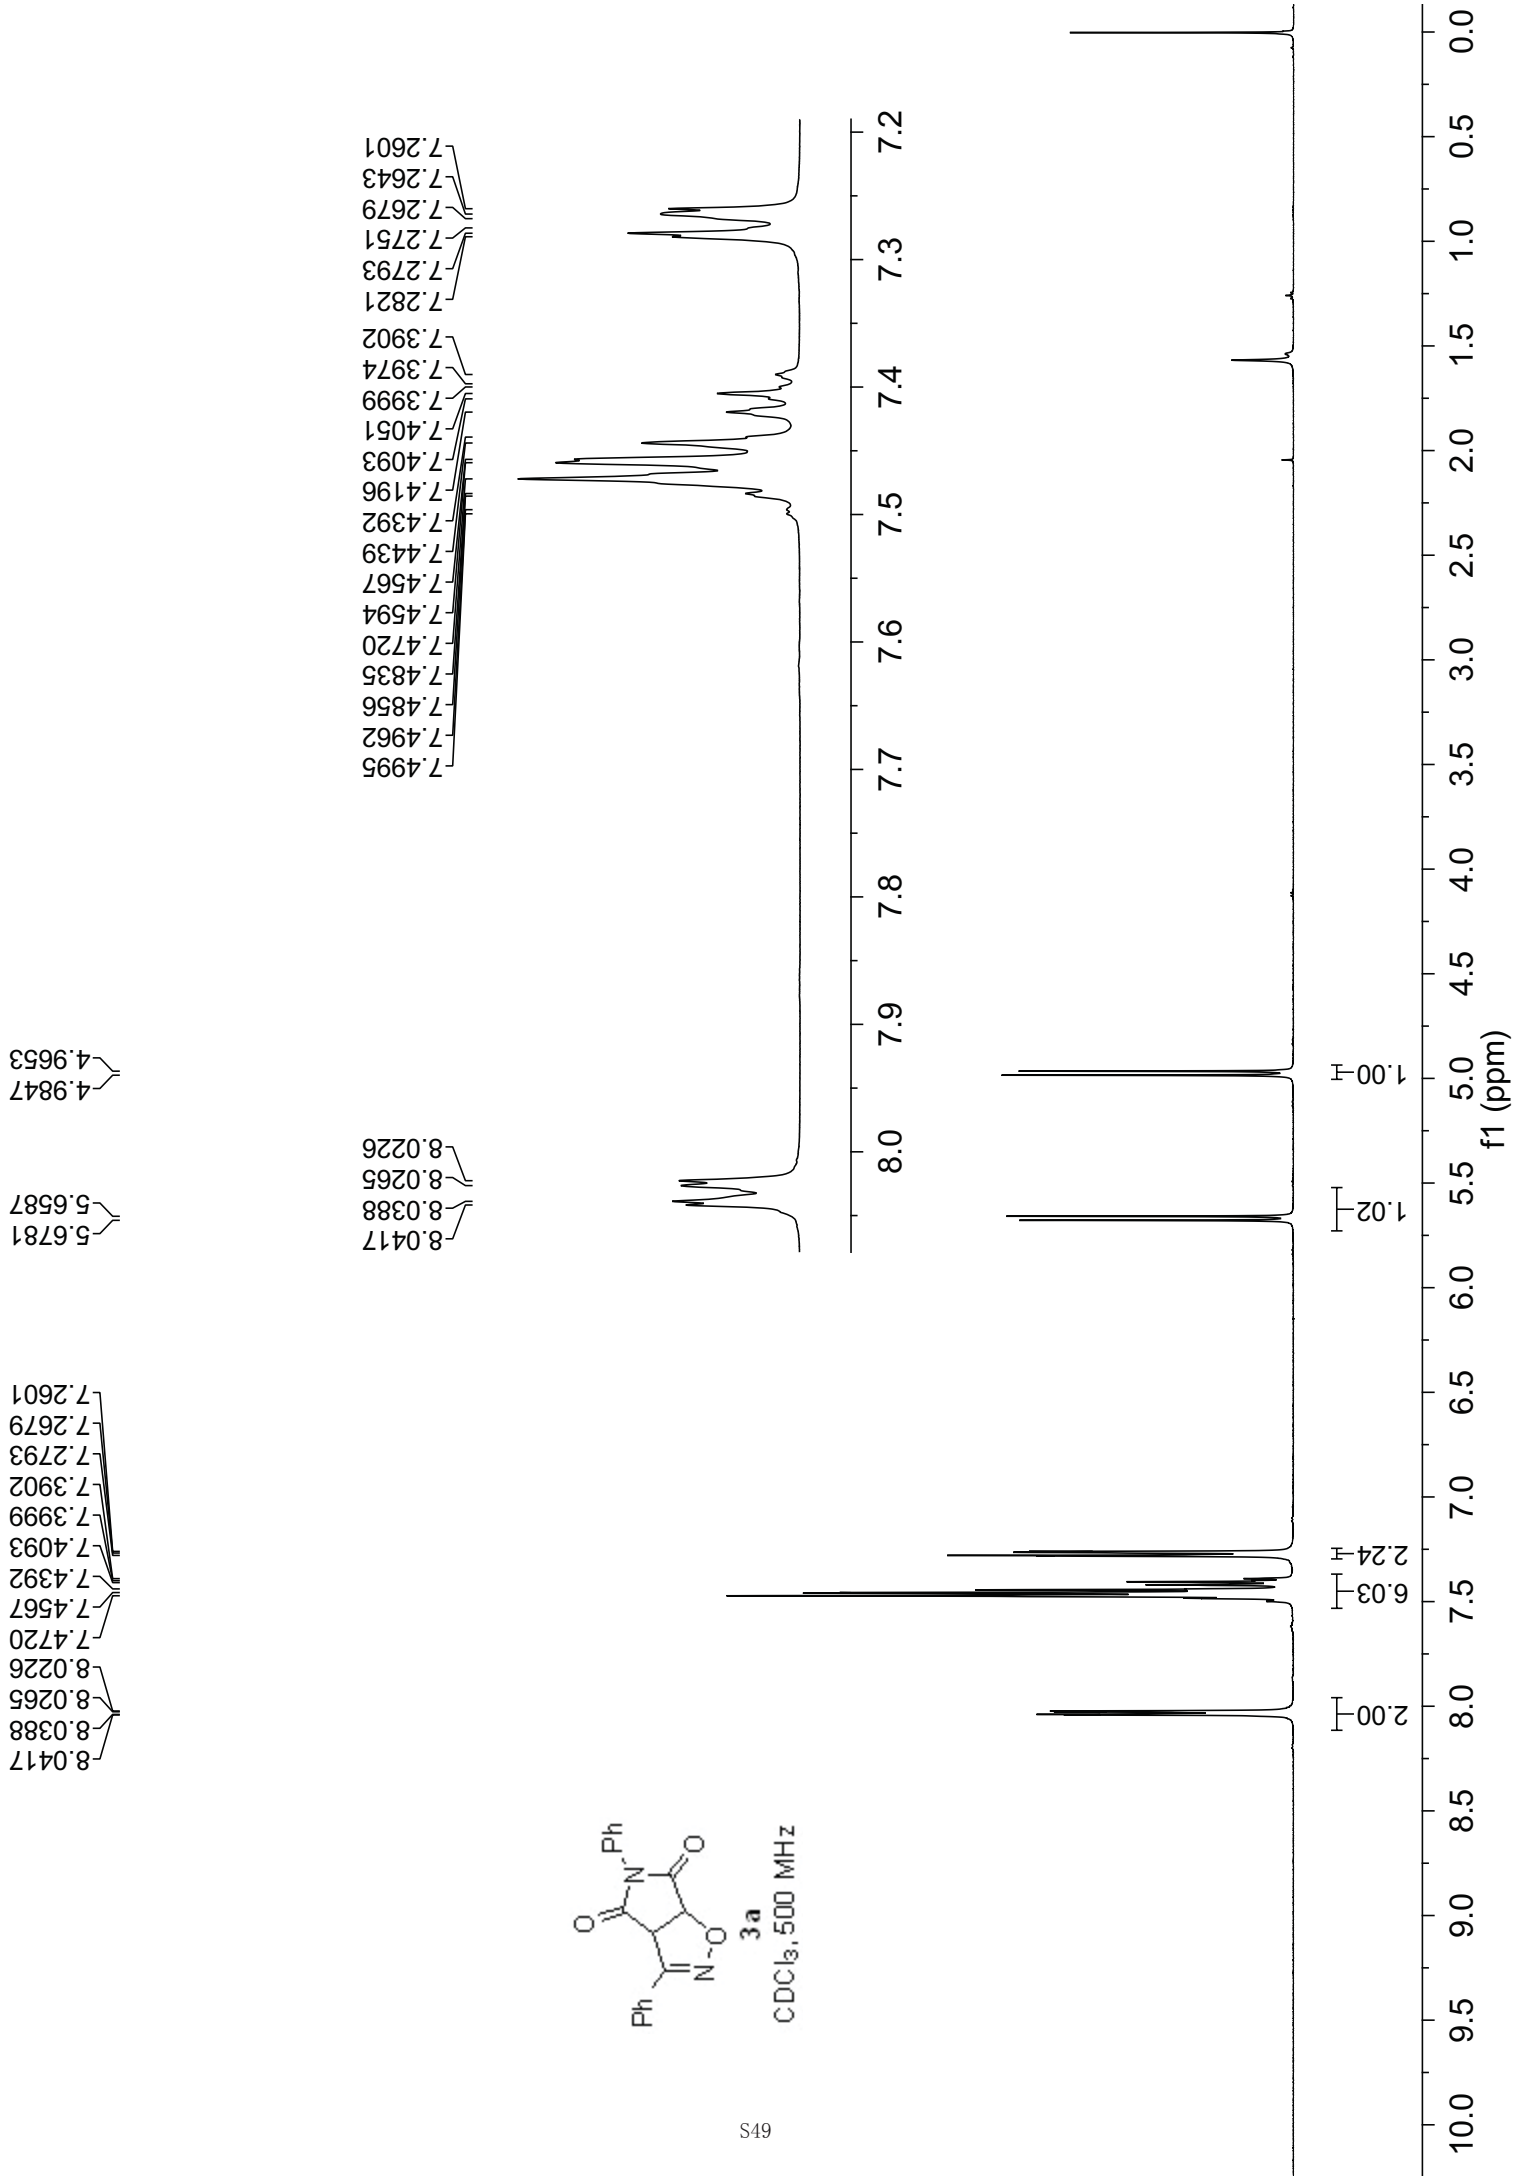

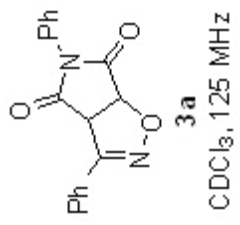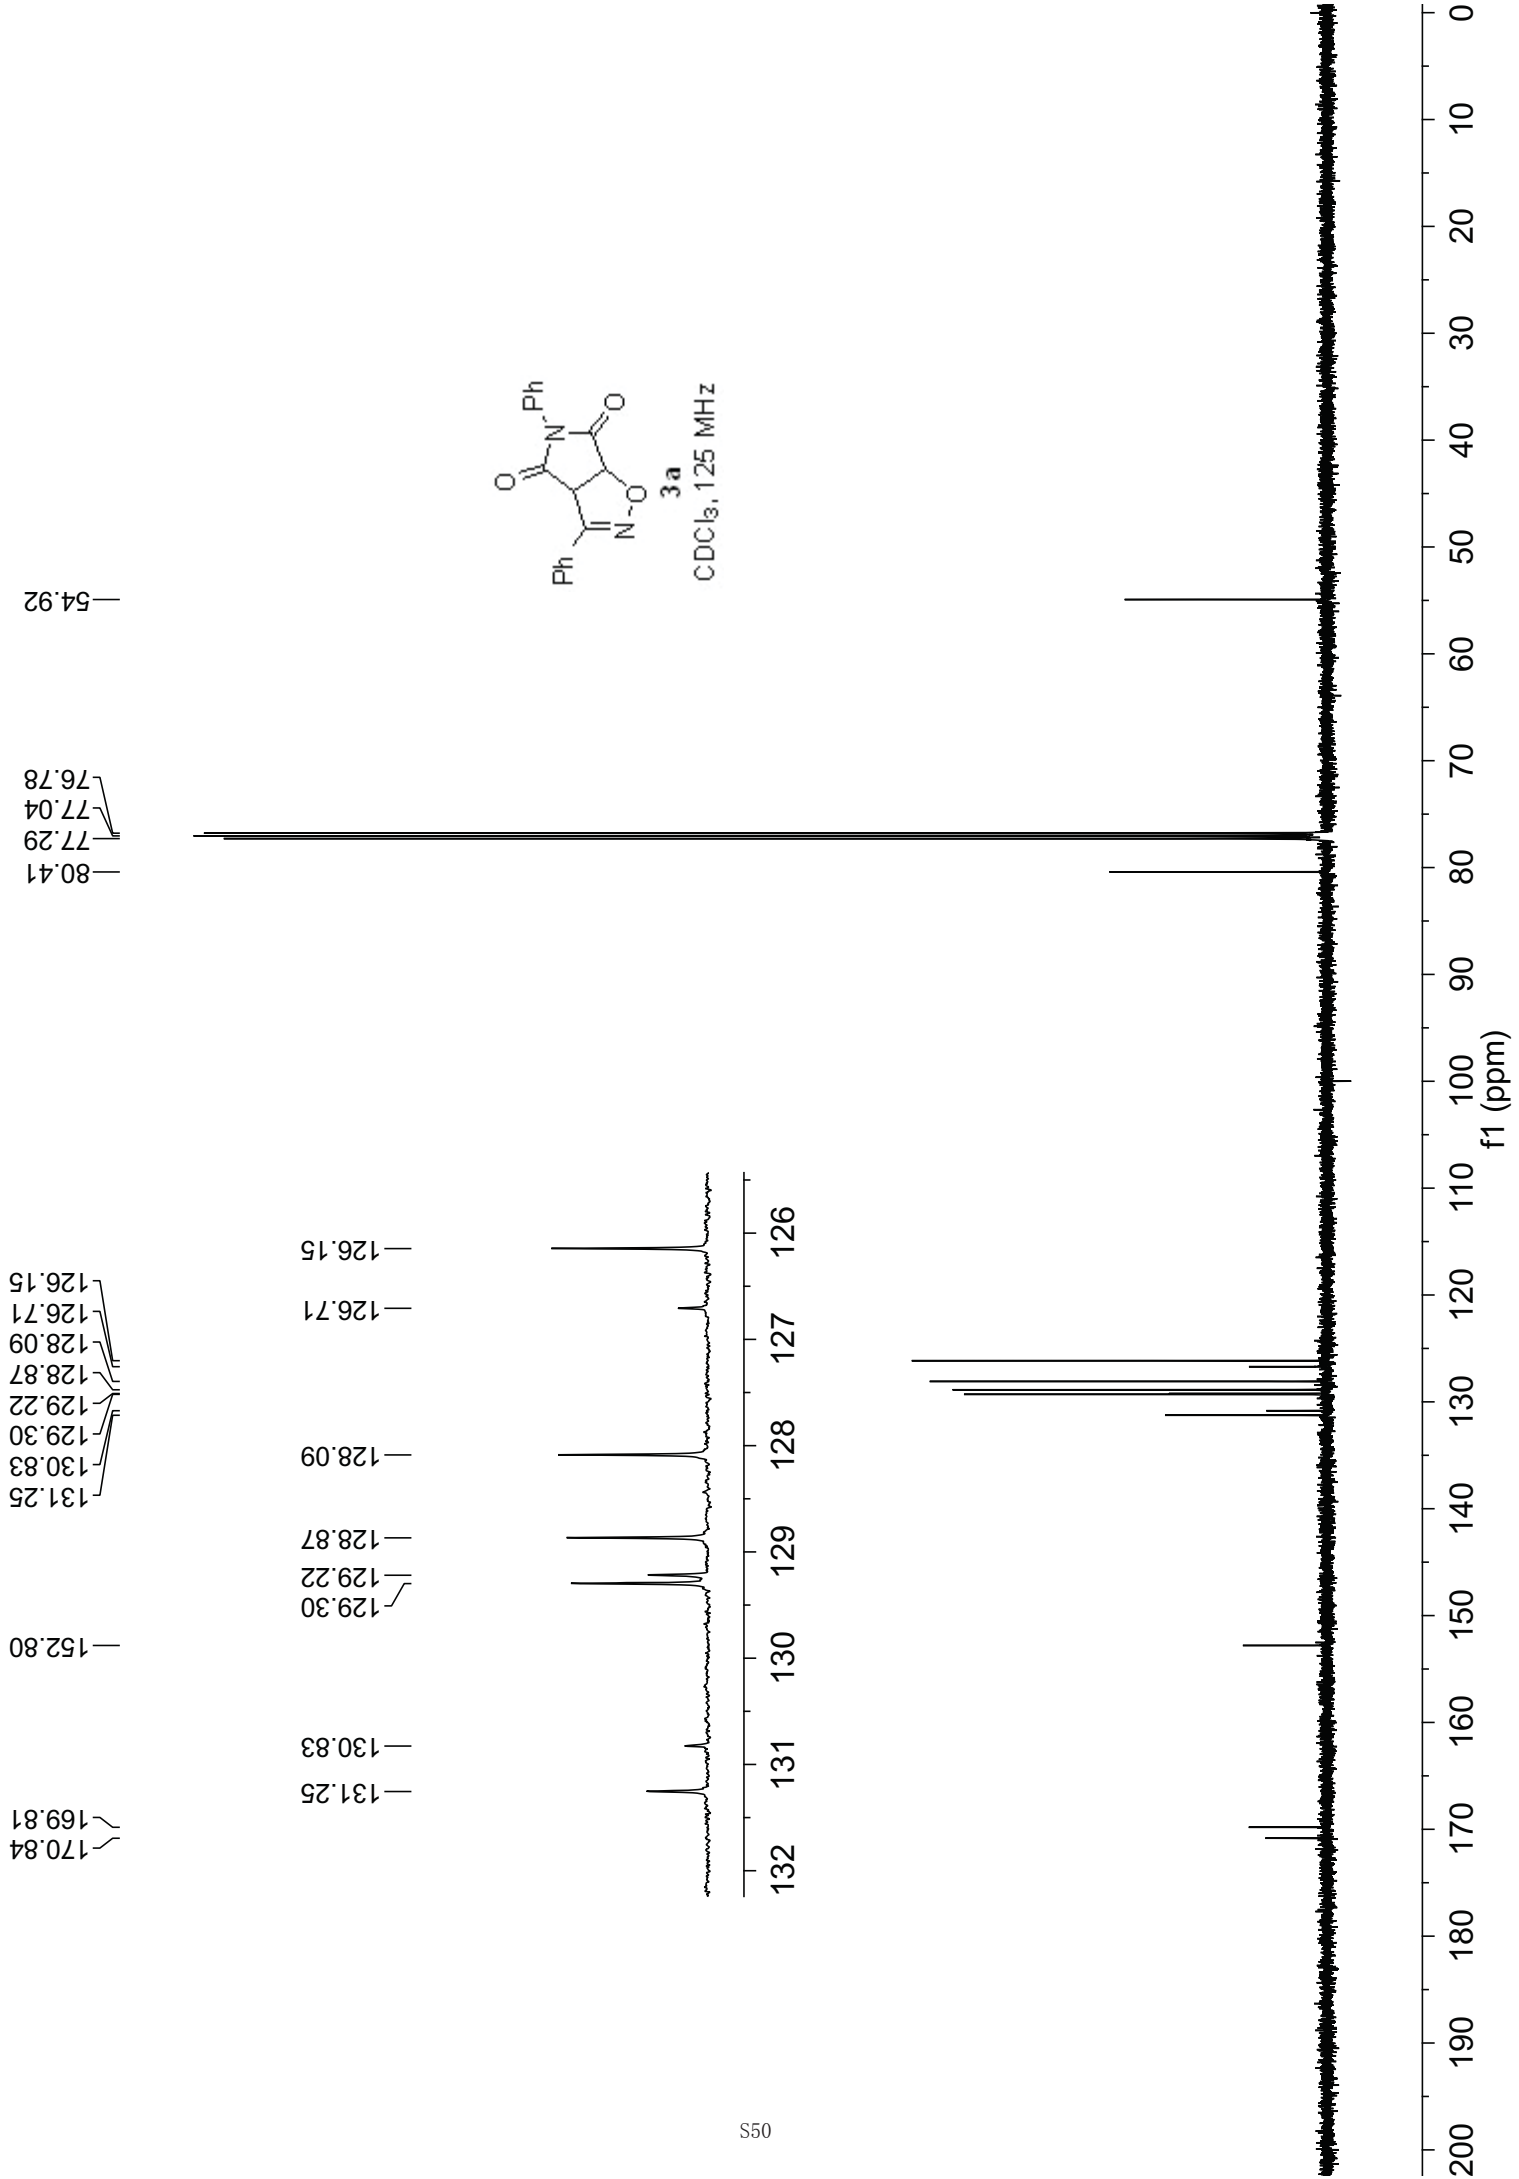

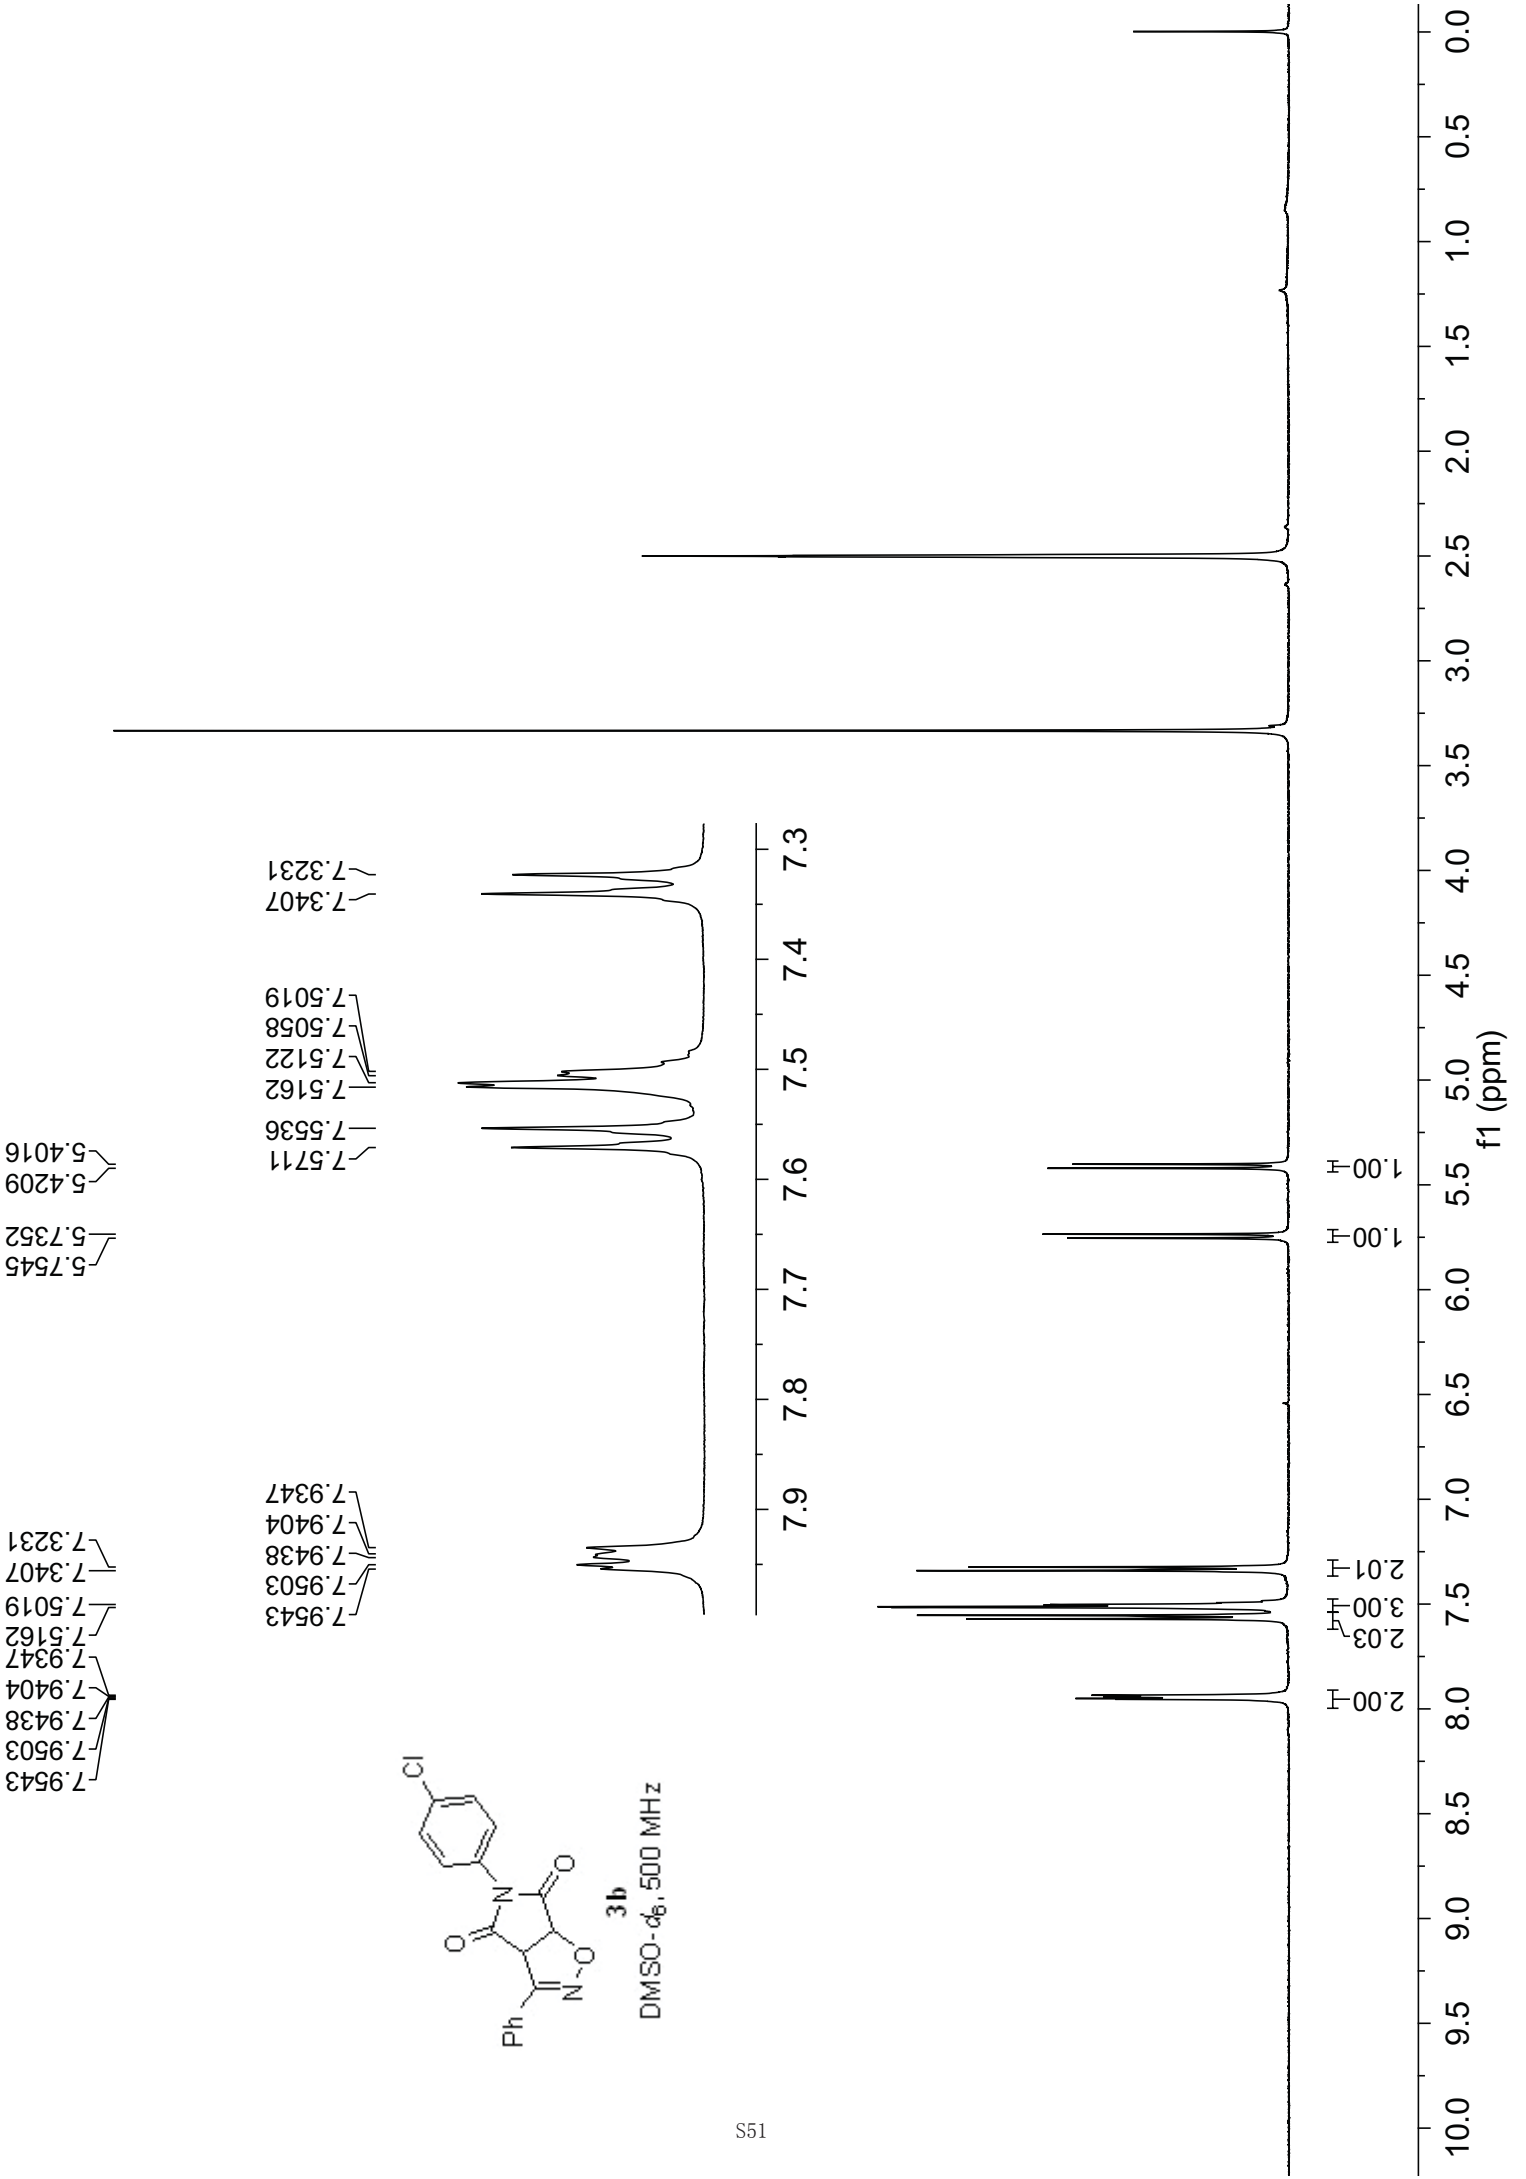

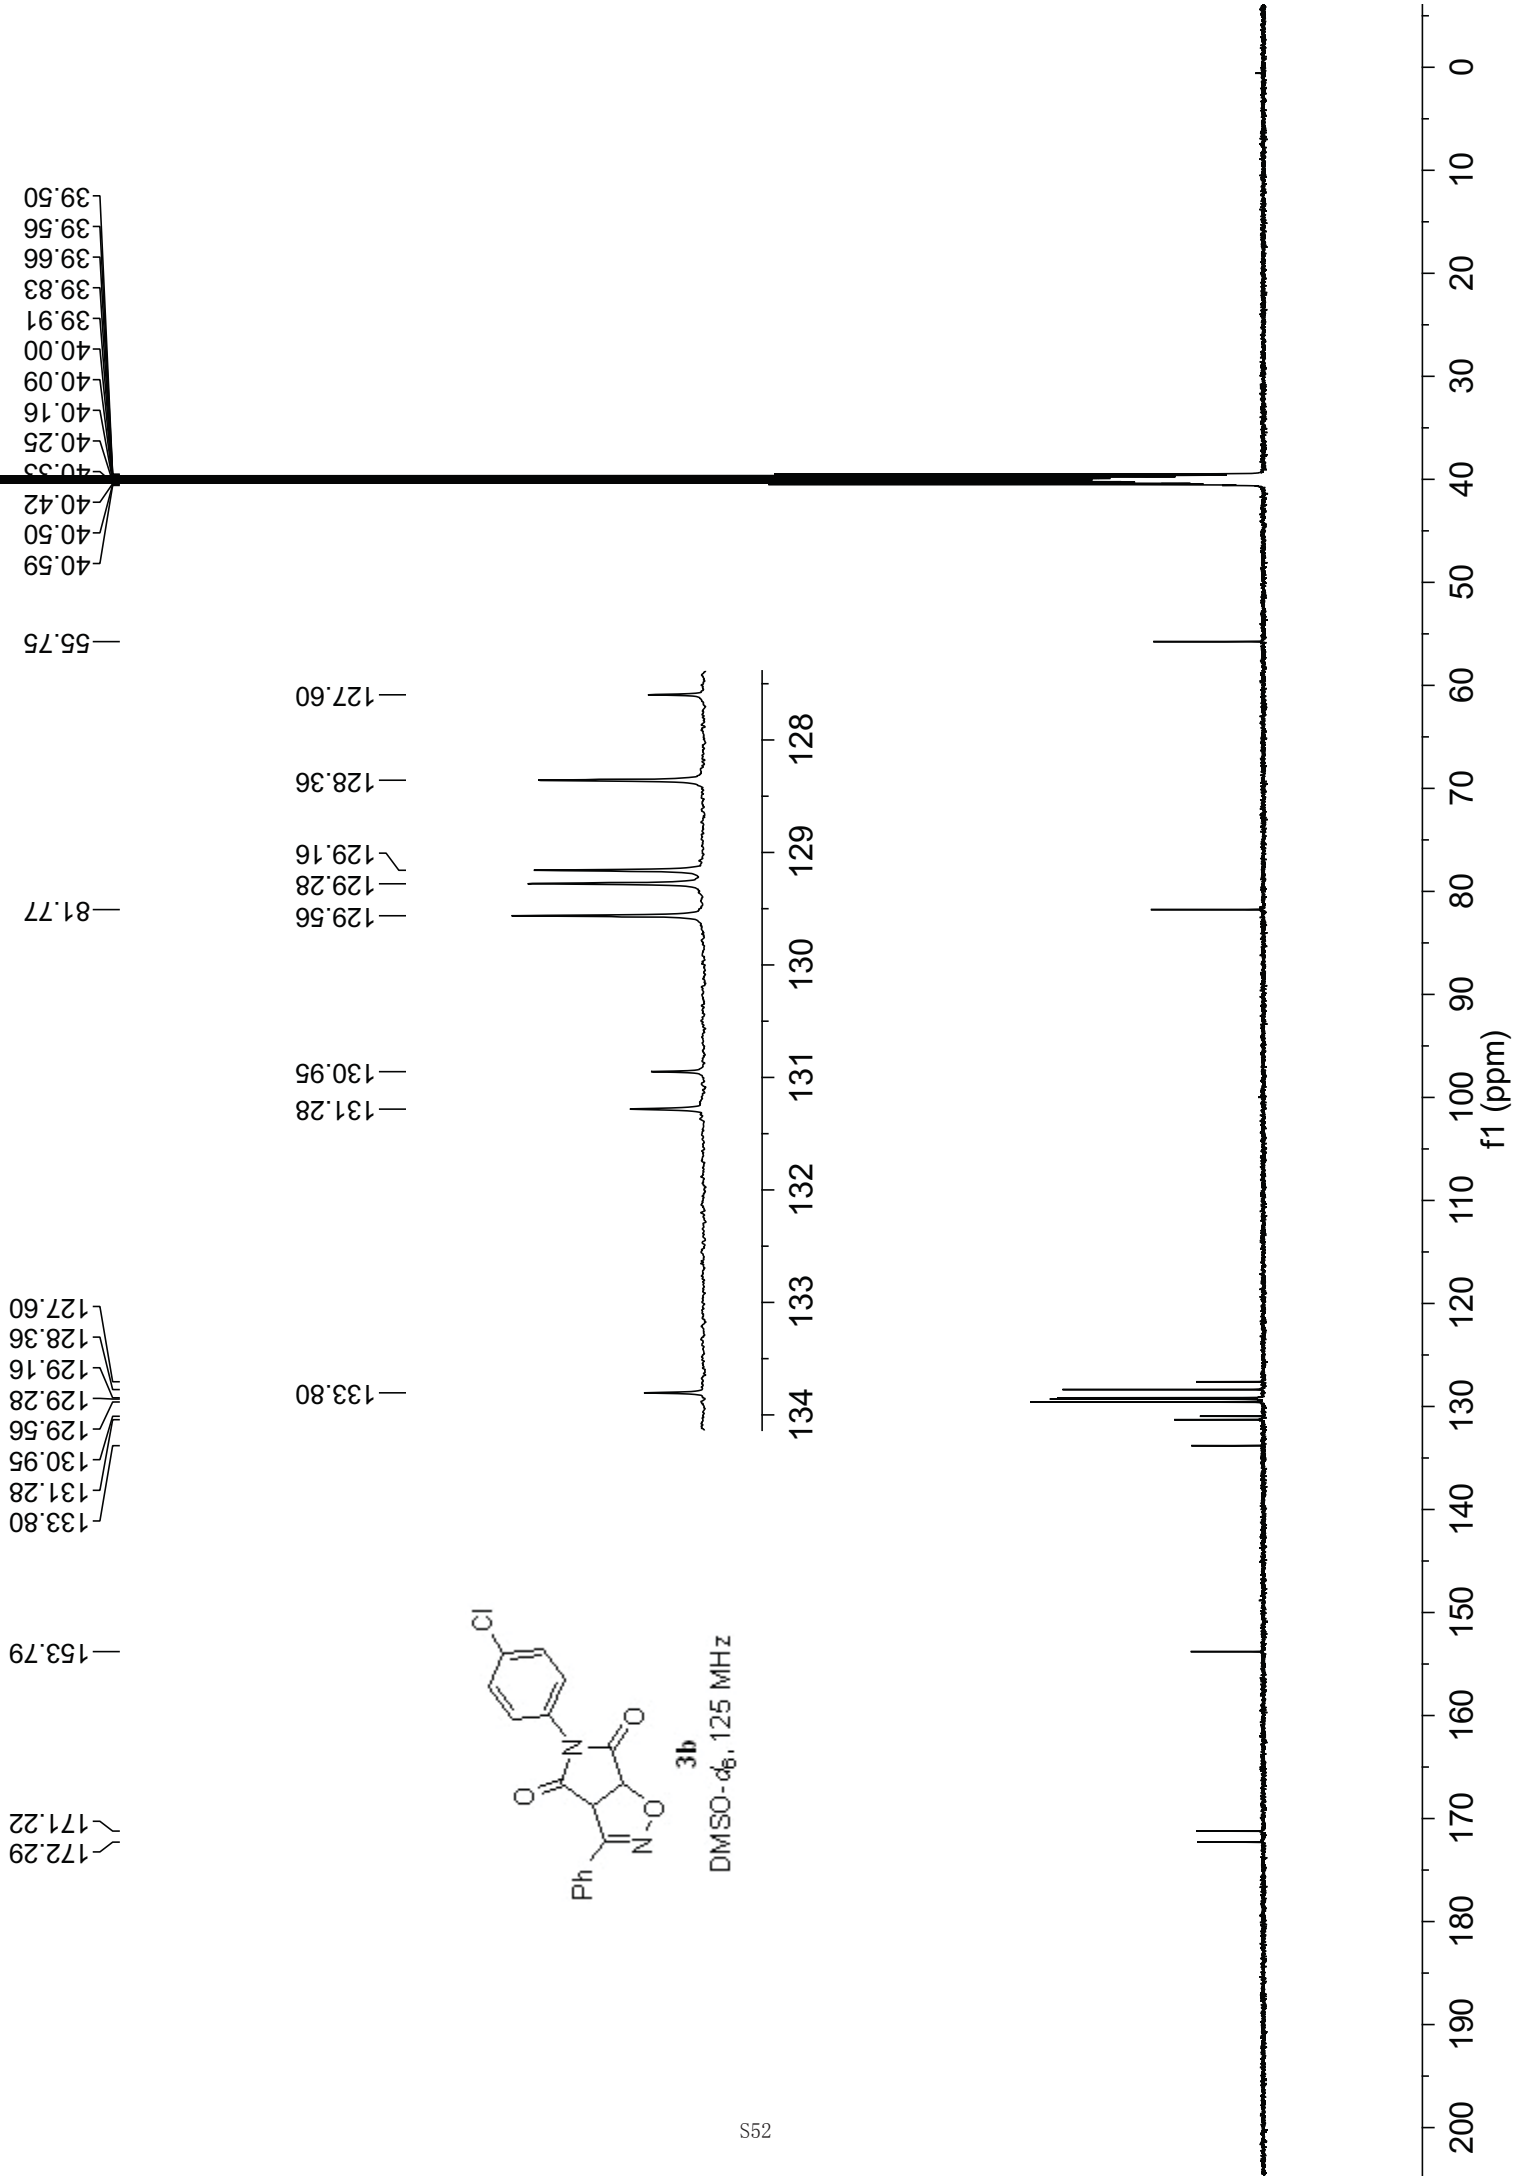

11.8882

7.9156  
7.9083  
7.9023  
7.8987  
7.8950  
7.8929  
7.8920  
7.8880  
7.8829  
7.8706  
7.8654

7.5337  
5.5148  
5.1562  
5.1374

2.5004

7.9156  
7.9083  
7.9023  
7.8987  
7.8950  
7.8929  
7.8920  
7.8880  
7.8829  
7.8706  
7.8654  
7.5105  
7.5066  
7.5005  
7.4974  
7.4958  
7.4922  
7.4889  
7.4854  
7.4787  
7.4755  
7.4710  
7.4676  
7.4676

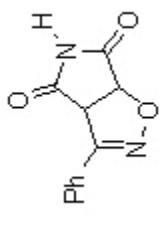

3c  
DMSO-d<sub>6</sub>, 500 MHz

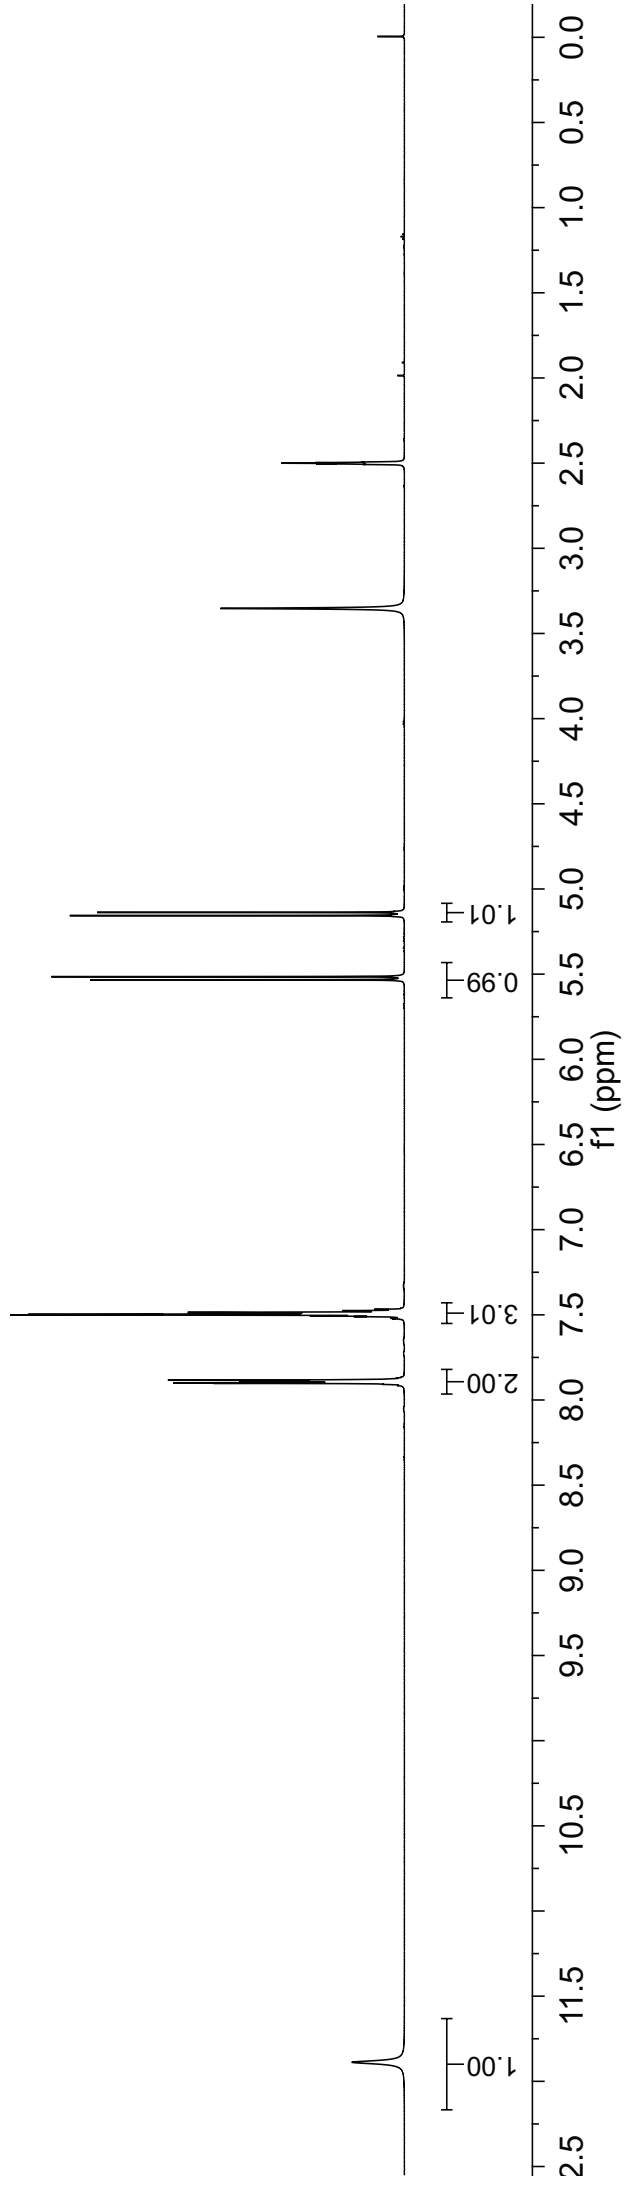

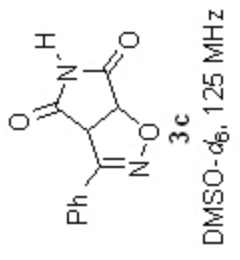

174.82  
 173.70  
 154.03  
 131.21  
 129.16  
 128.27  
 127.61  
 82.77  
 56.59  
 40.47  
 40.31  
 40.23  
 40.14  
 40.06  
 39.97  
 39.89  
 39.80  
 39.64  
 39.47

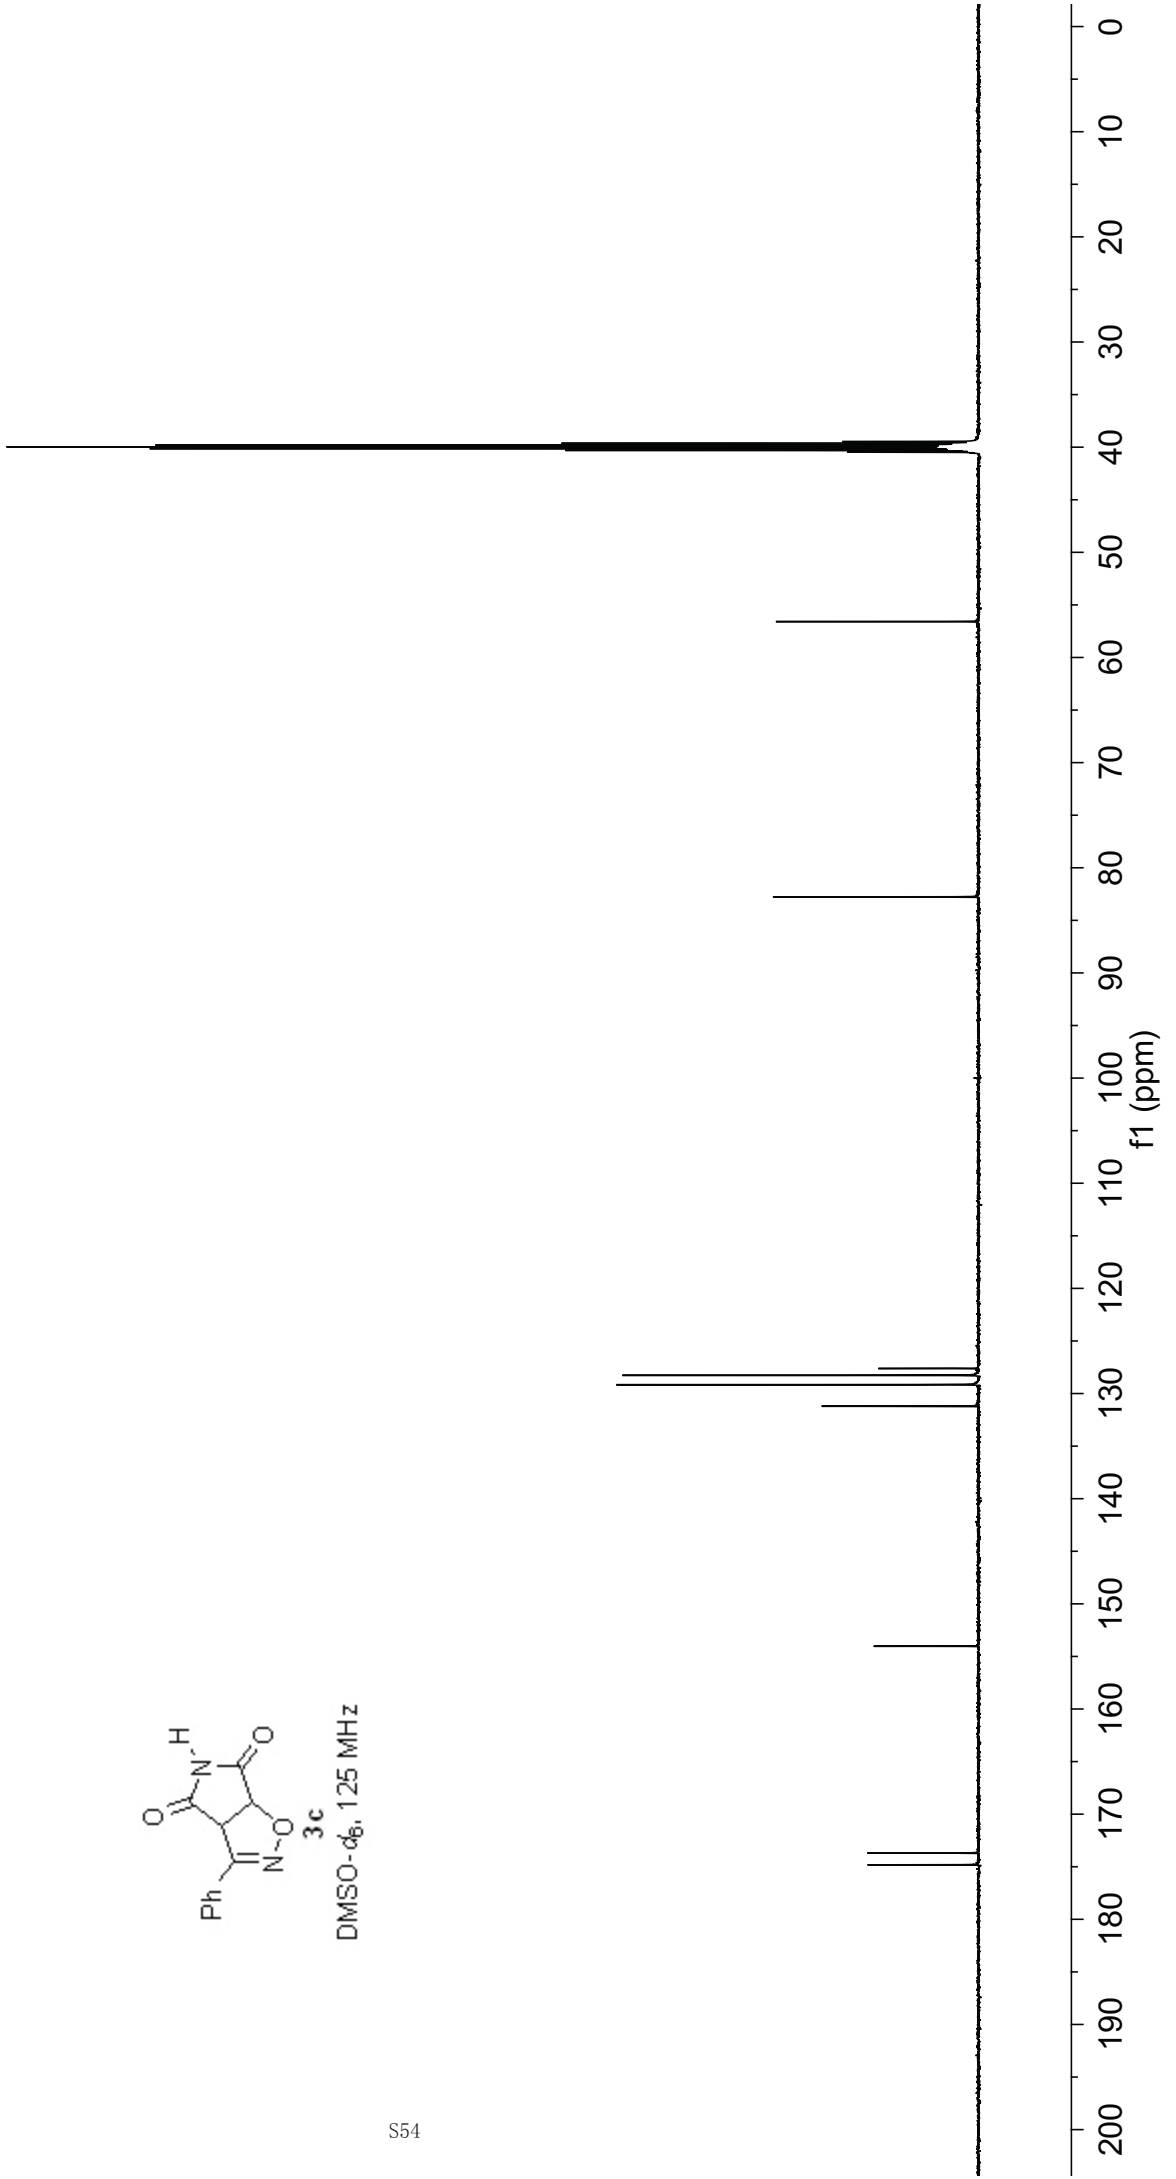

0.8491  
 0.8639  
 0.8786  
 1.2330  
 1.4746  
 1.4806  
 1.4889  
 1.4963  
 1.5036  
 1.5115  
 1.5184  
 1.5265  
 3.4478  
 3.4620  
 3.4744  
 3.4880  
 3.5024  
 3.5159  
 3.5282  
 3.5425  
 4.7901  
 4.8092  
 5.4771  
 5.4963  
 7.2603  
 7.4124  
 7.4415  
 7.4542  
 7.4579  
 7.9590  
 7.9702  
 7.9737

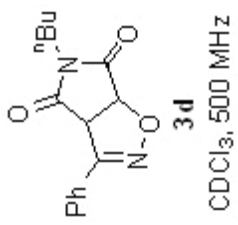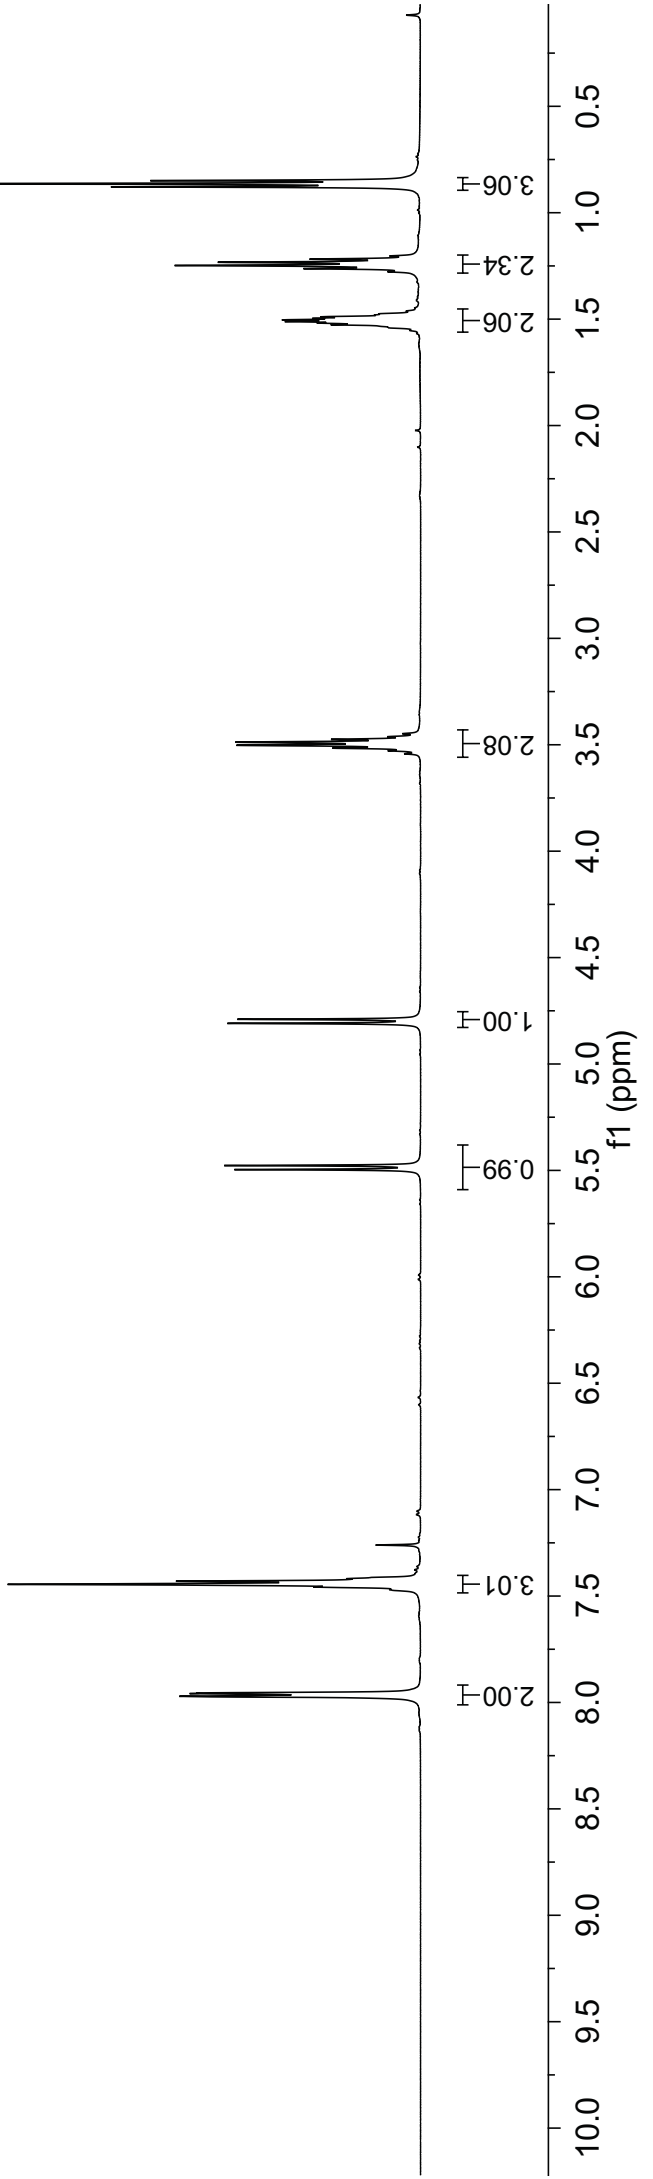

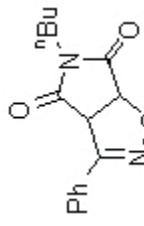

**3d**

CDCl<sub>3</sub>, 125 MHz

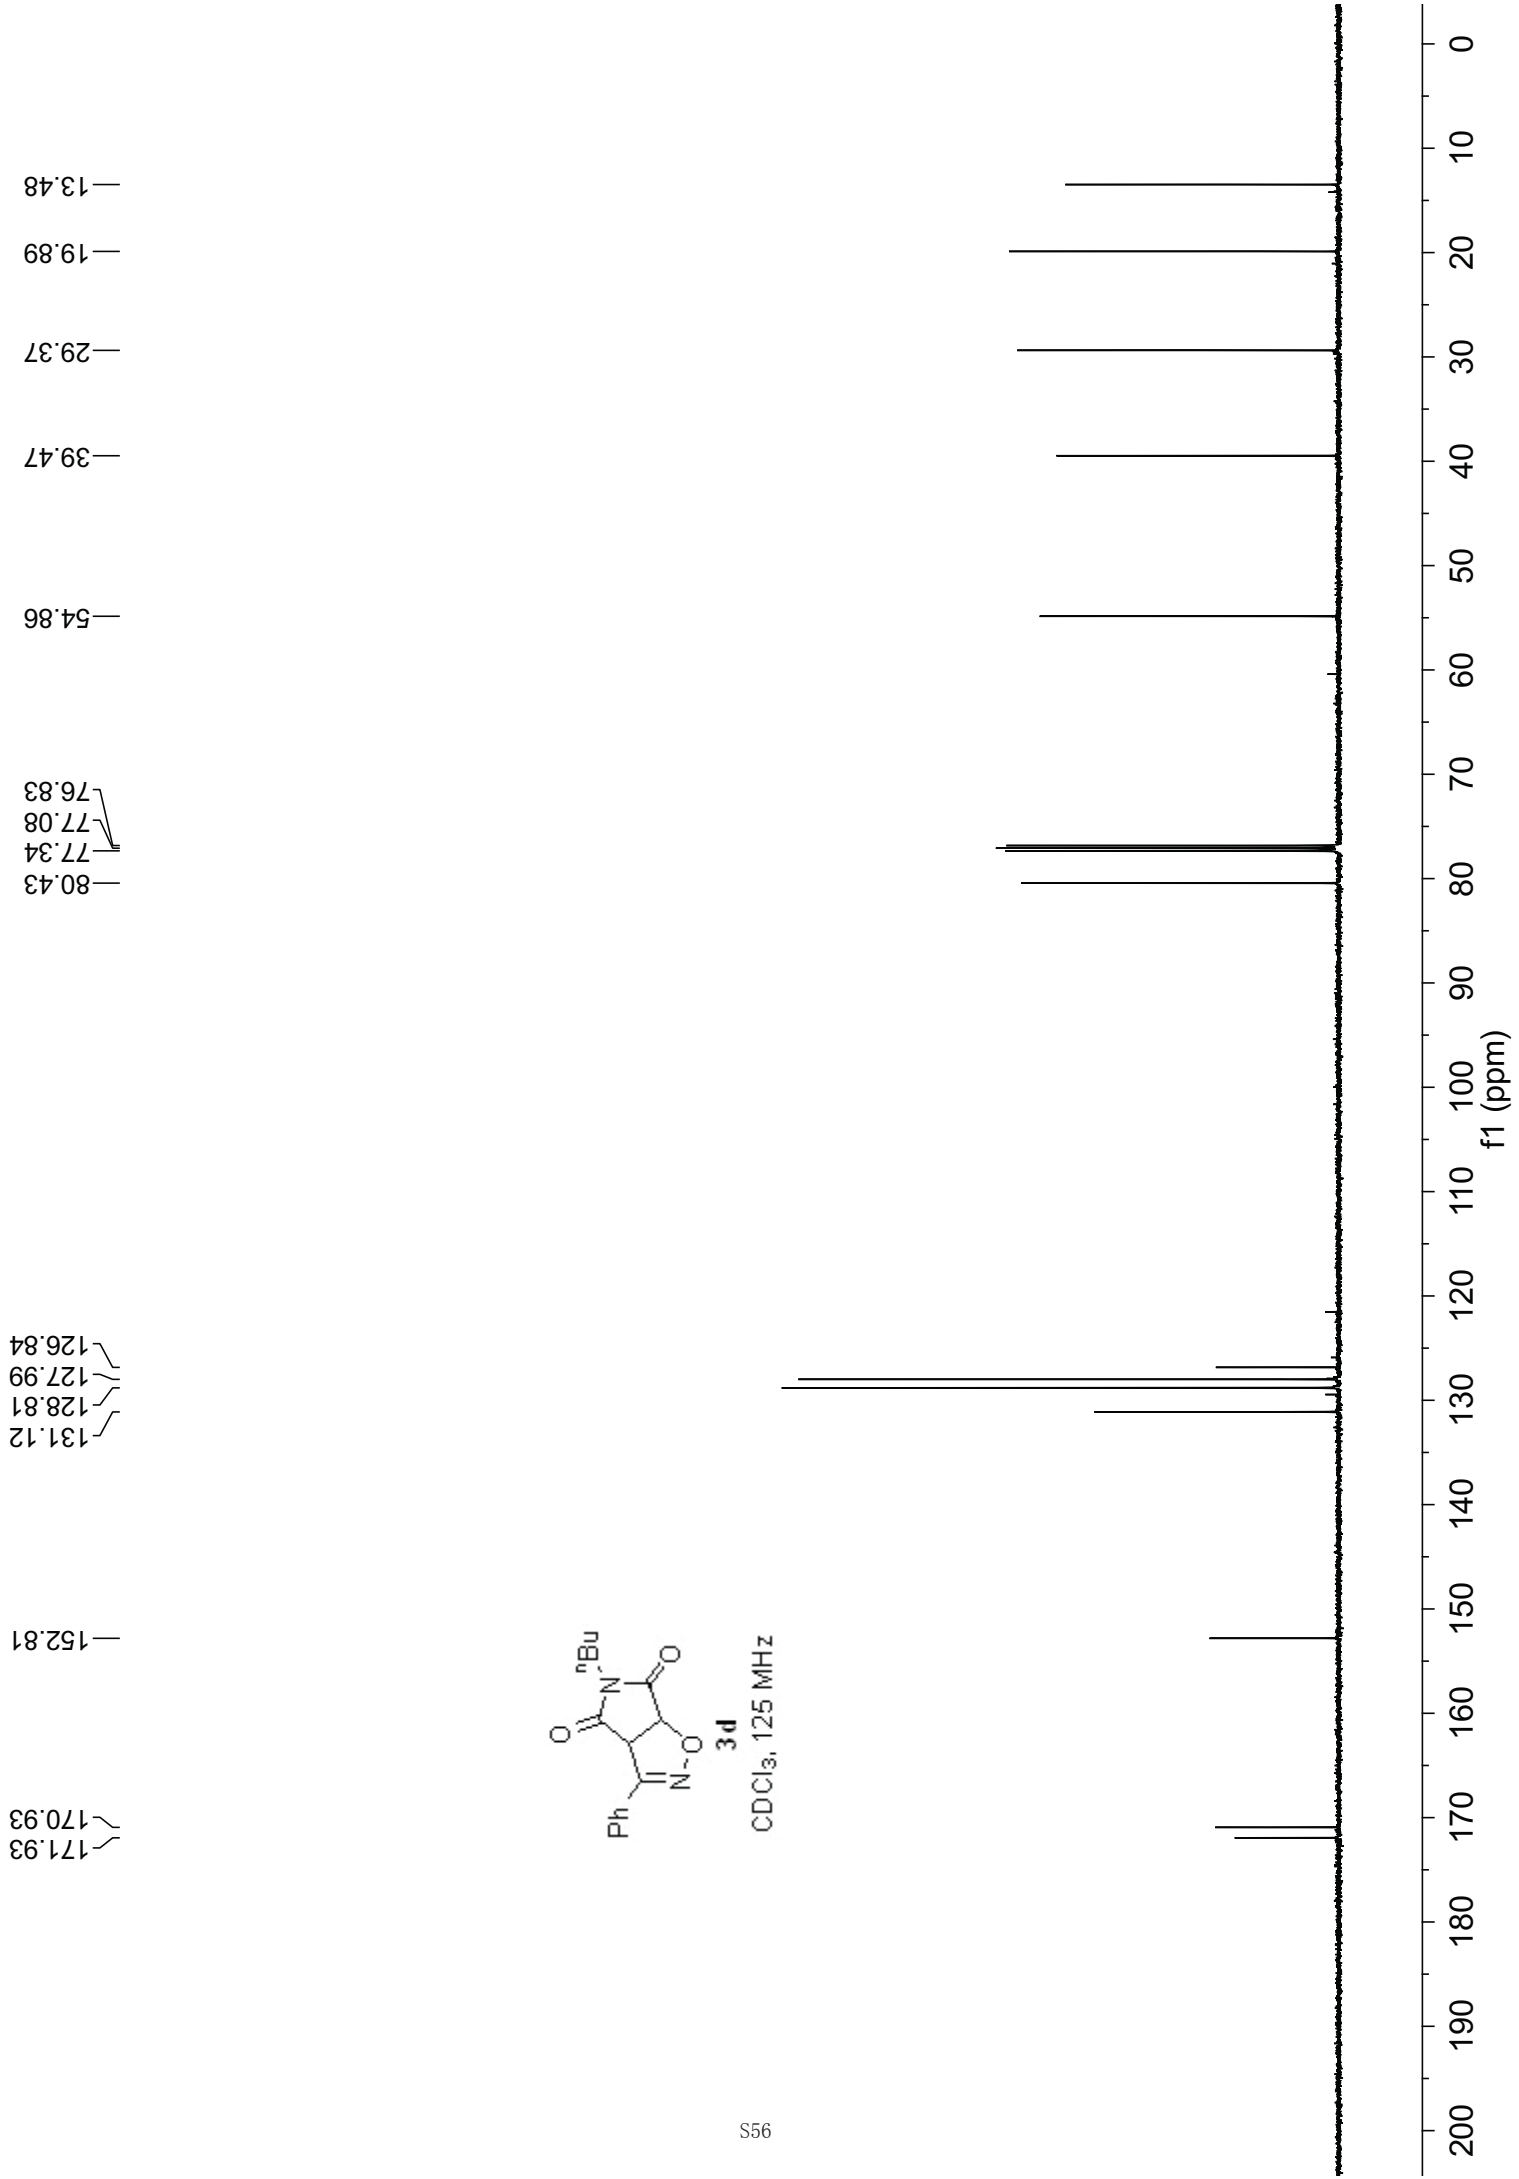



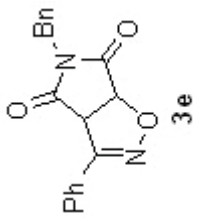

CDCl<sub>3</sub>, 500 MHz

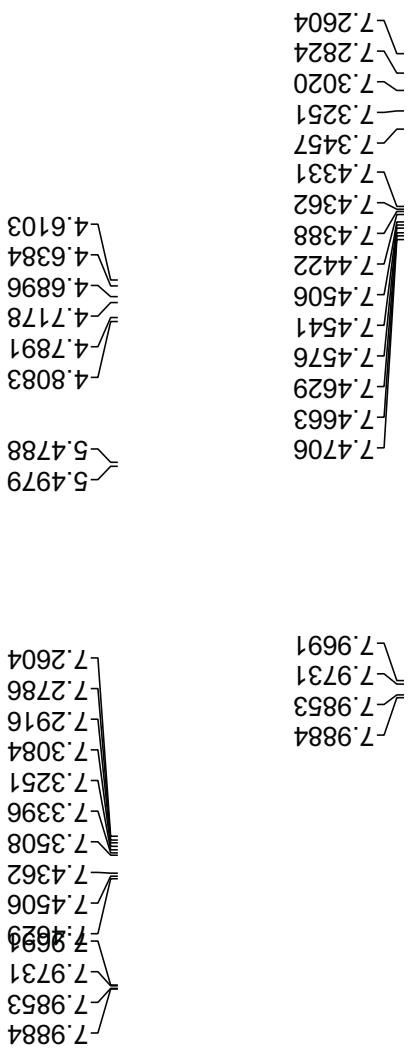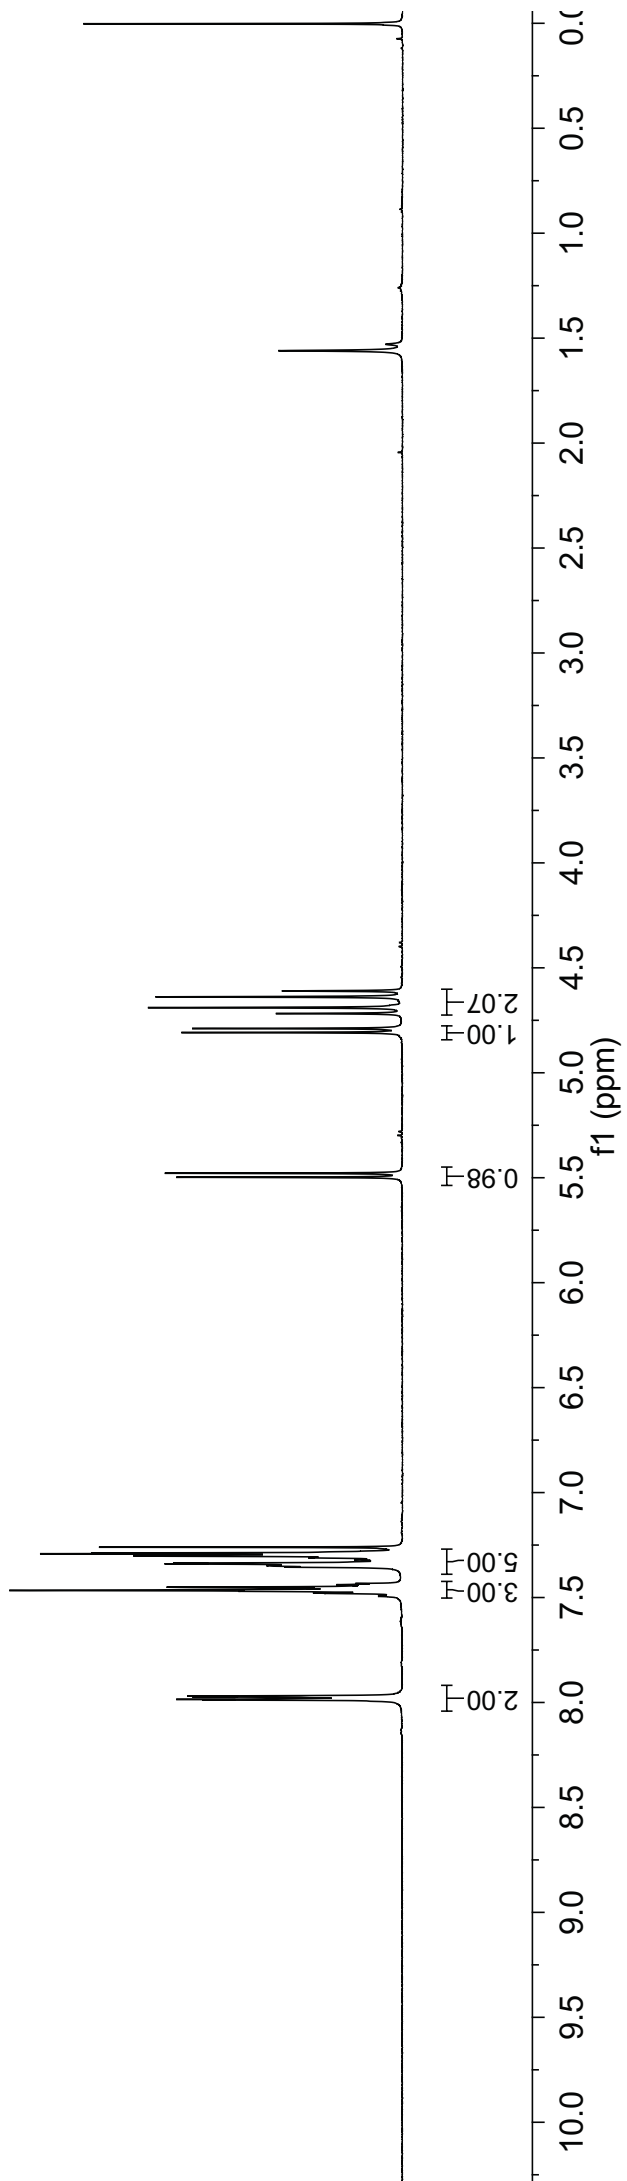

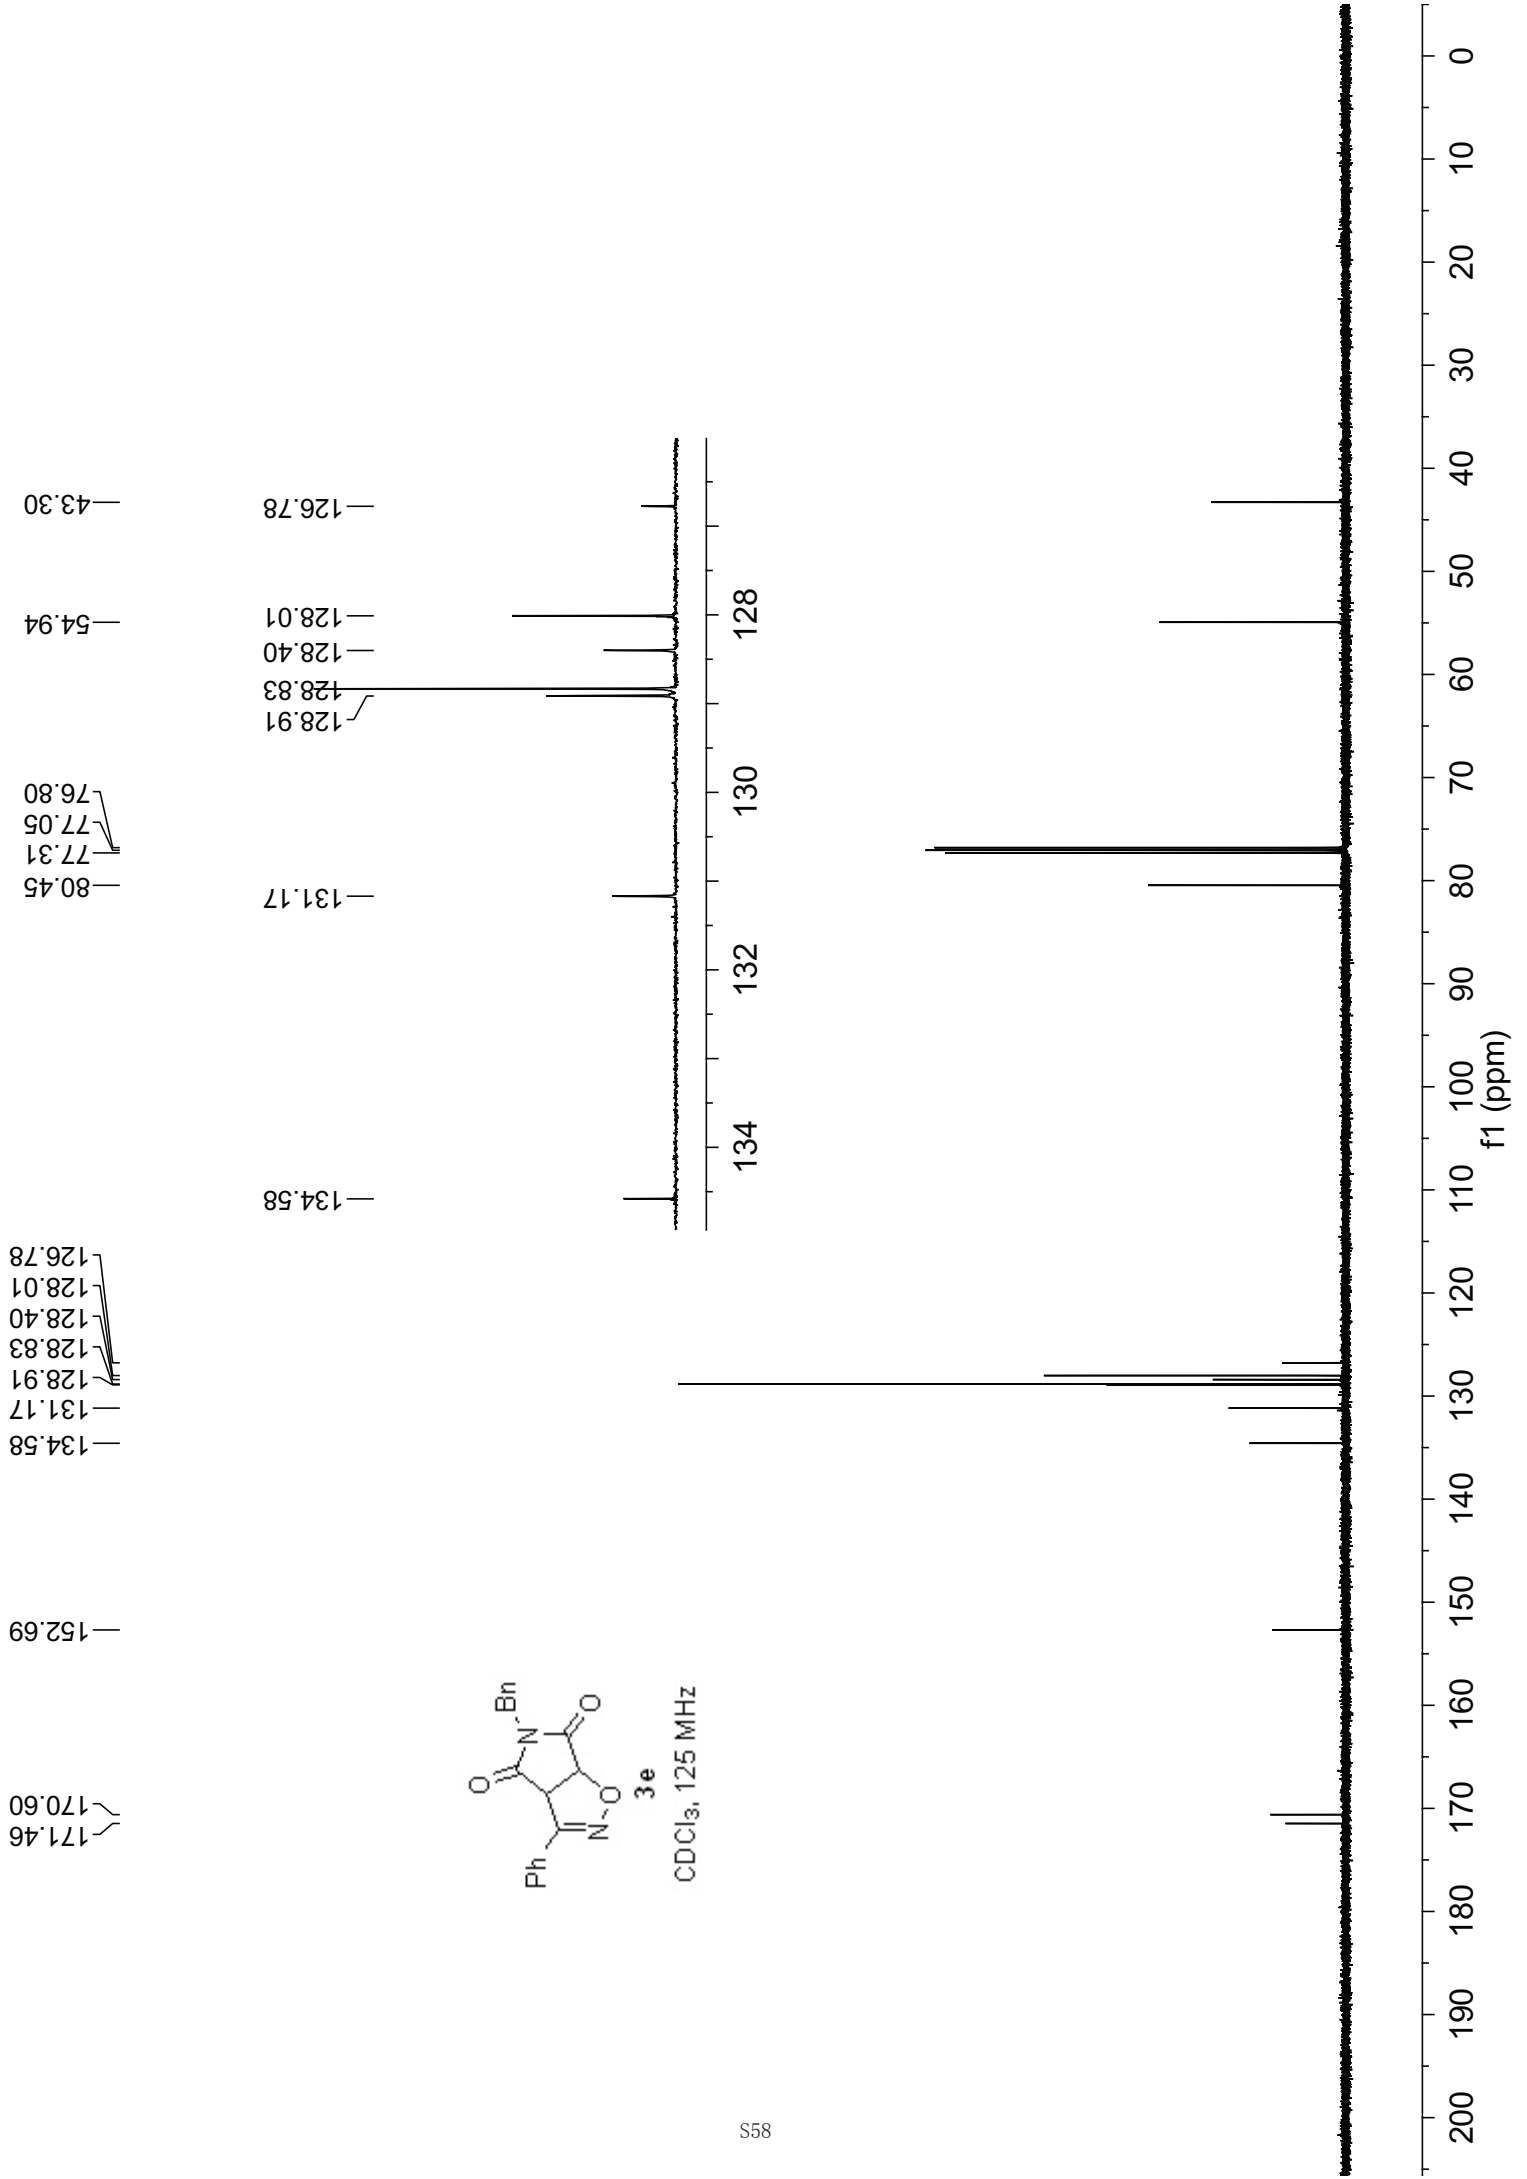

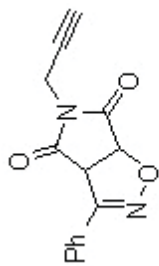

CDCl<sub>3</sub>, 500 MHz

2.2217  
2.2167  
2.2117

4.2285  
4.2335  
4.2626  
4.2676  
4.2859  
4.2909  
4.3200  
4.3250

4.8681  
4.8874

5.5689  
5.5496

7.2605  
7.4380  
7.4556  
7.4739  
7.4759  
7.9764  
7.9891  
7.9919

7.5001  
7.4952  
7.4843  
7.4757  
7.4709  
7.4622  
7.4556  
7.4470  
7.4380  
7.2605

7.9919  
7.9891  
7.9764  
7.9728

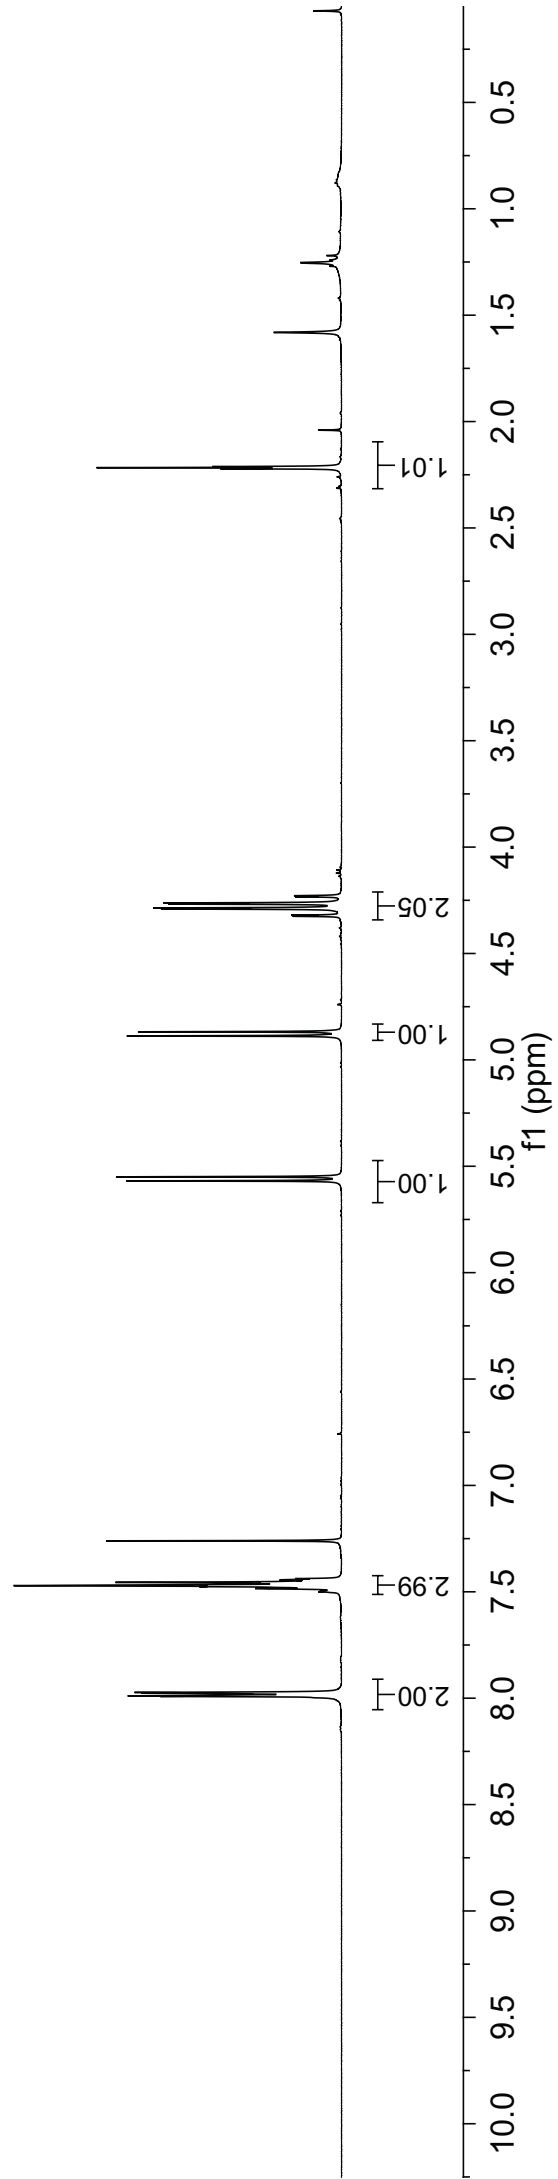

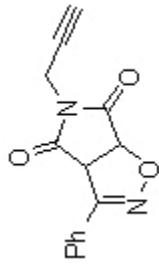

**3f**

CDCl<sub>3</sub>, 125 MHz

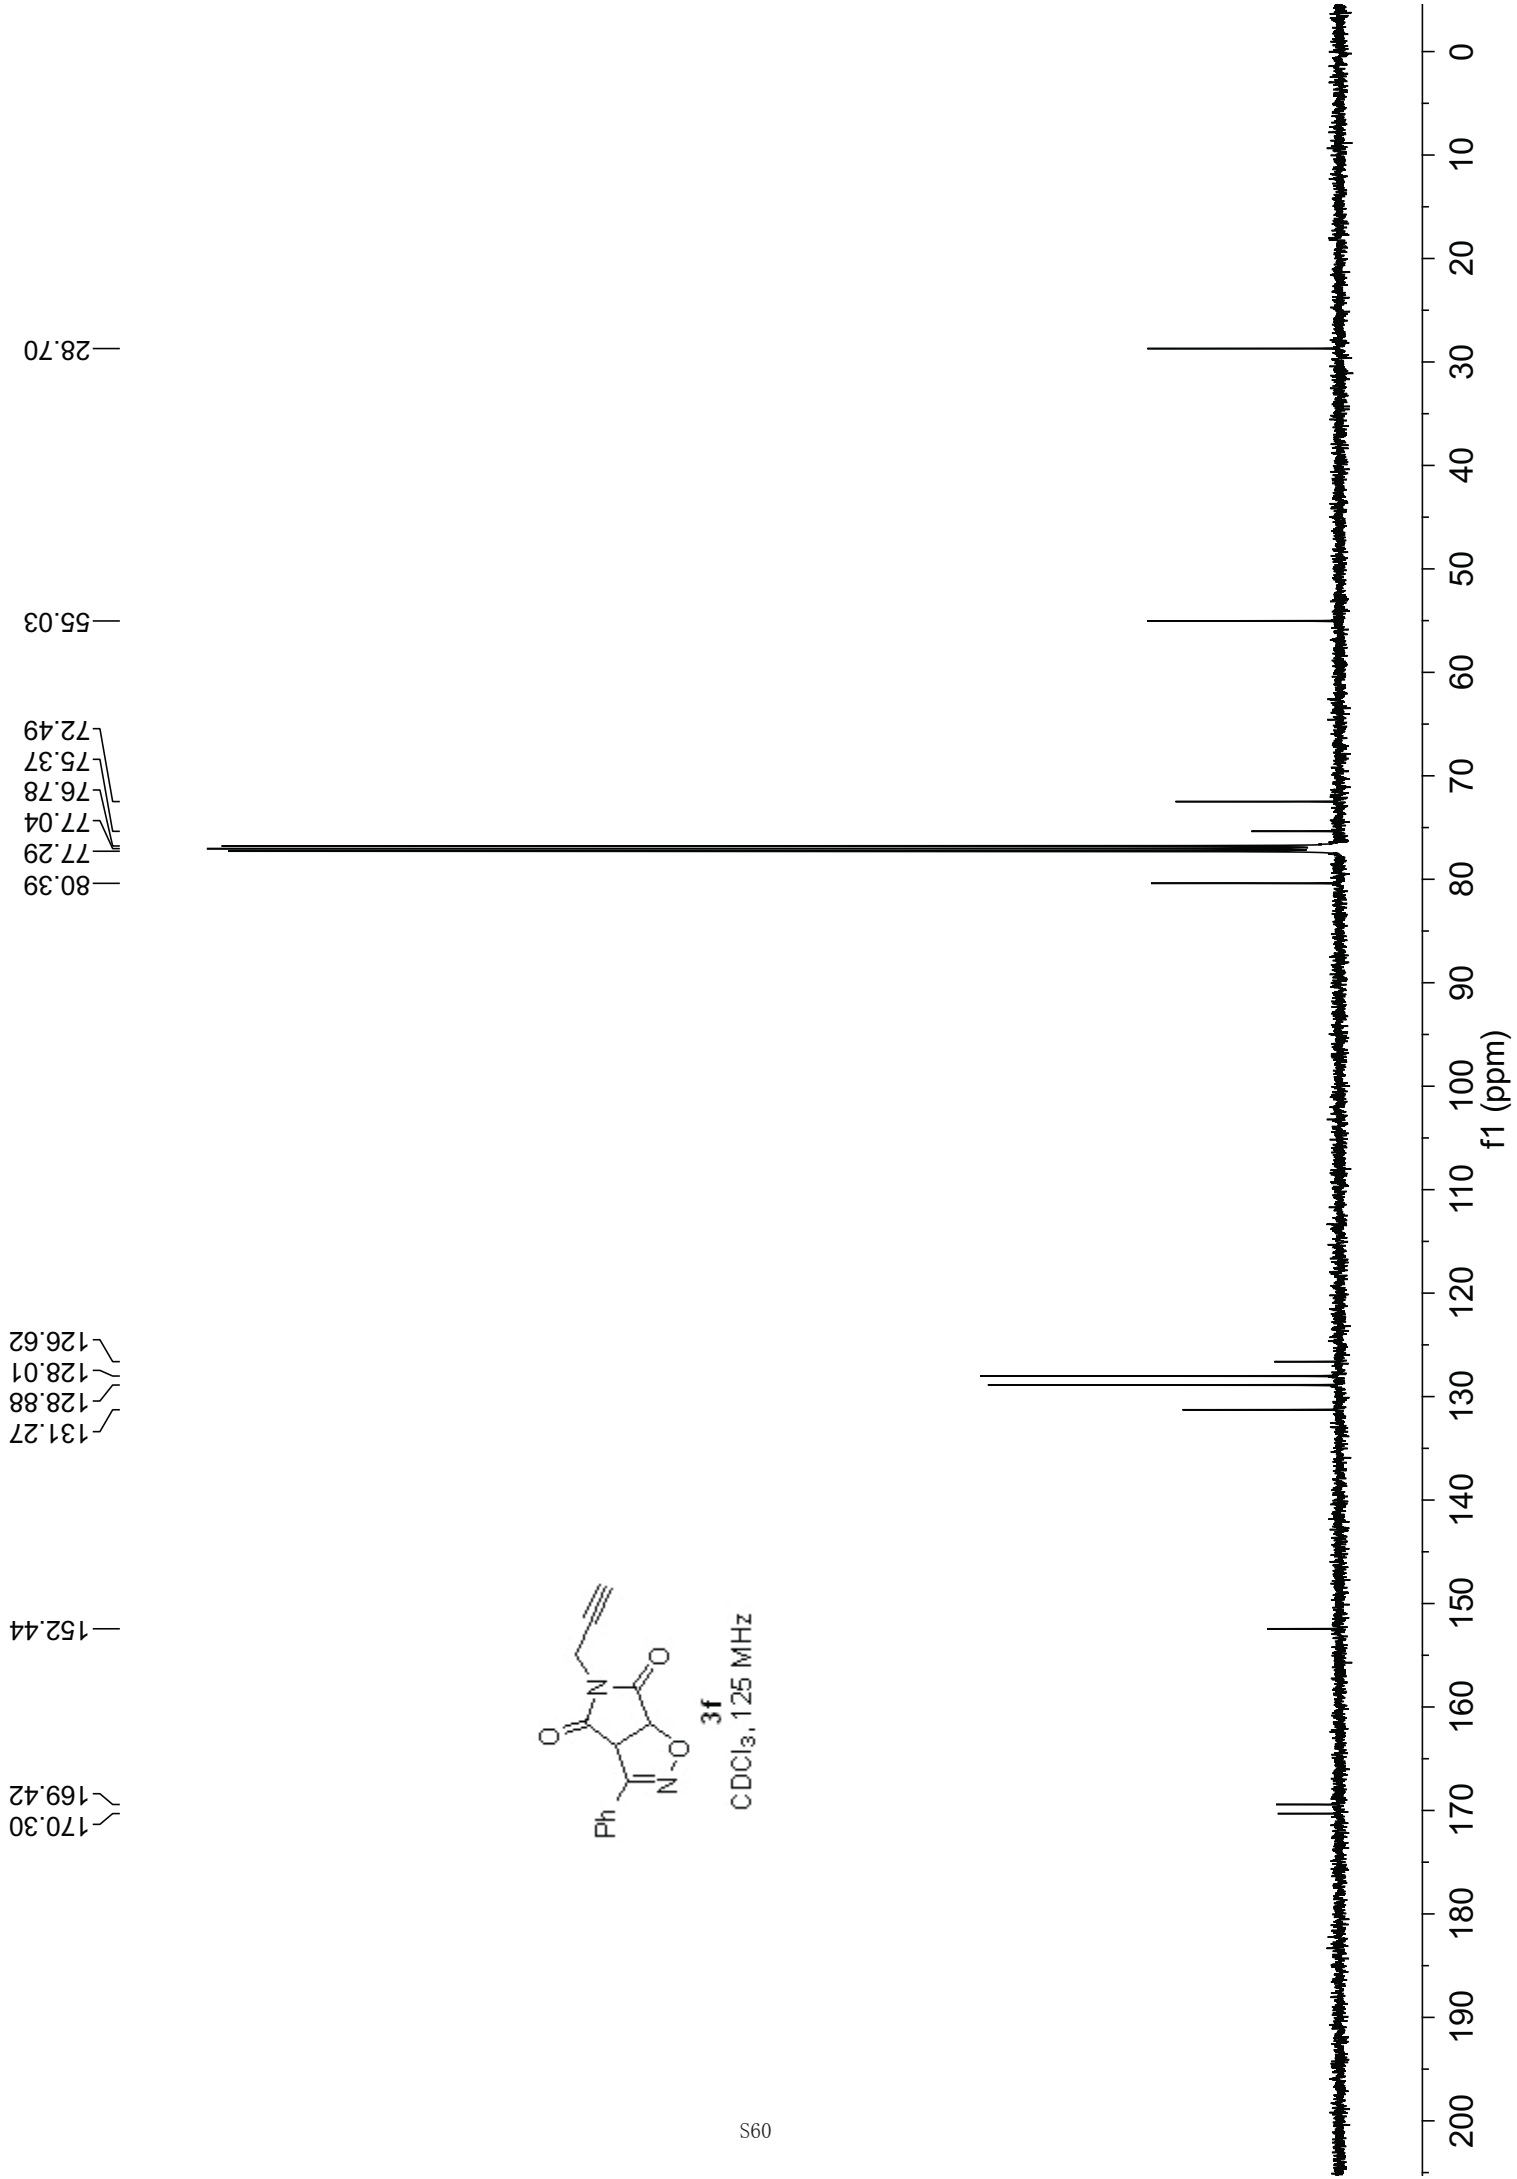

7.9126  
7.9002  
7.5866  
7.4583  
7.4195  
7.2718  
7.2603  
5.6908  
5.6719  
4.9446  
4.9258

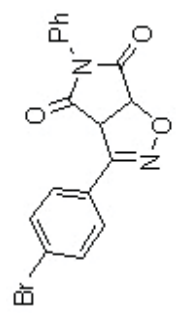

**3g**  
CDCl<sub>3</sub>, 500 MHz

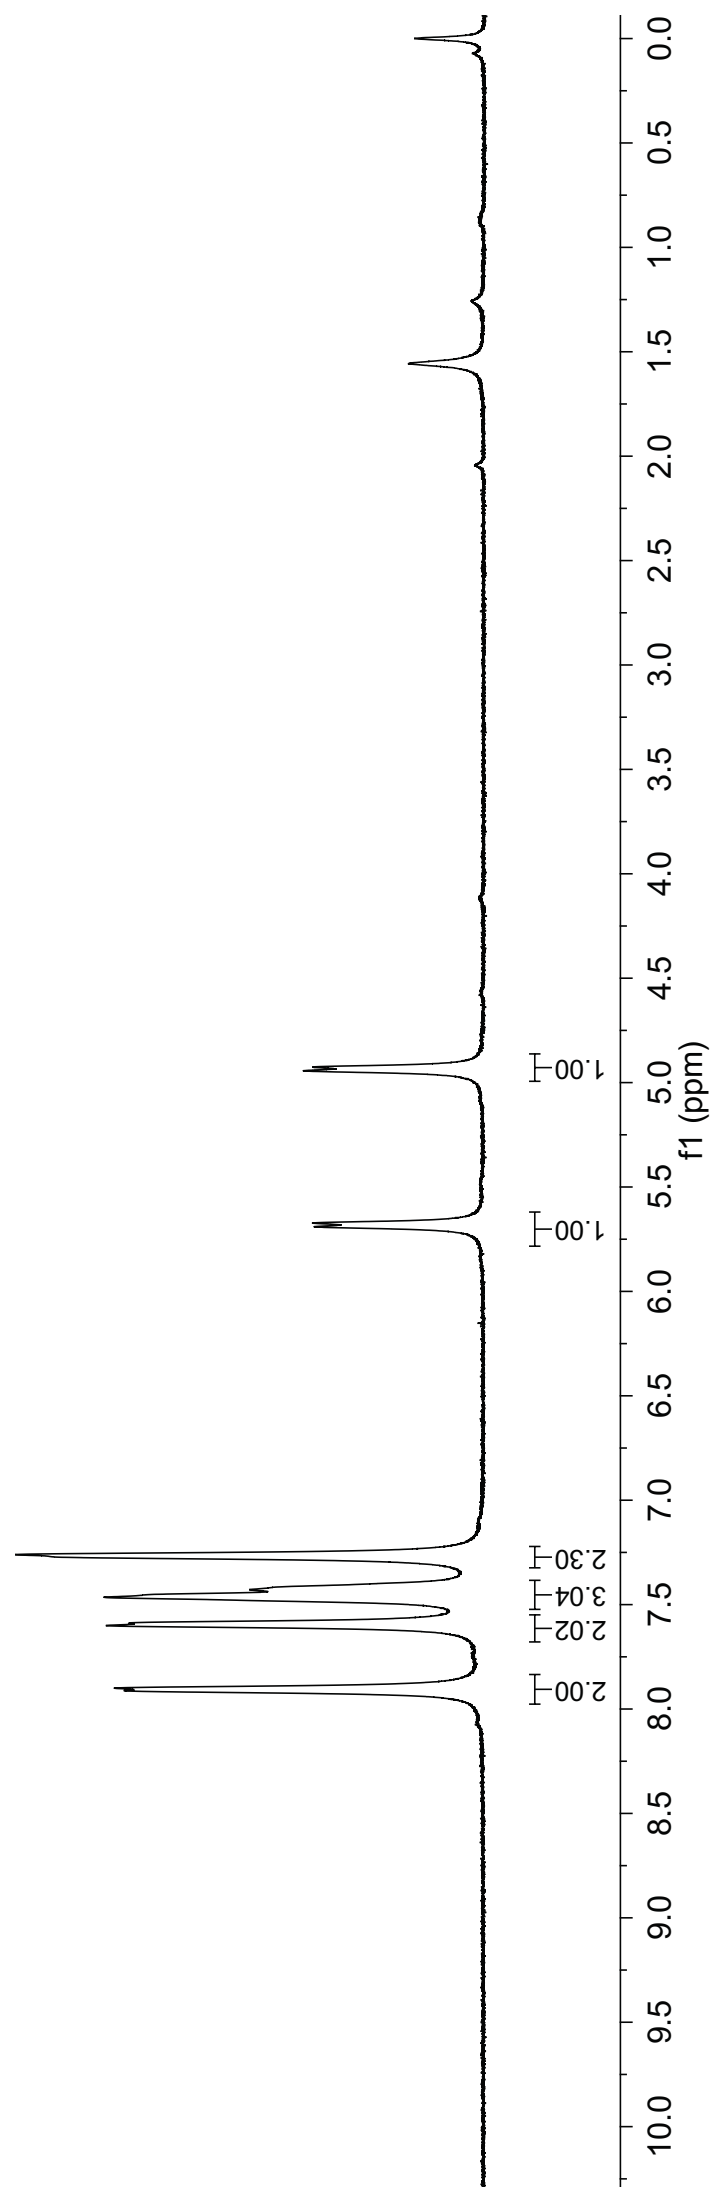

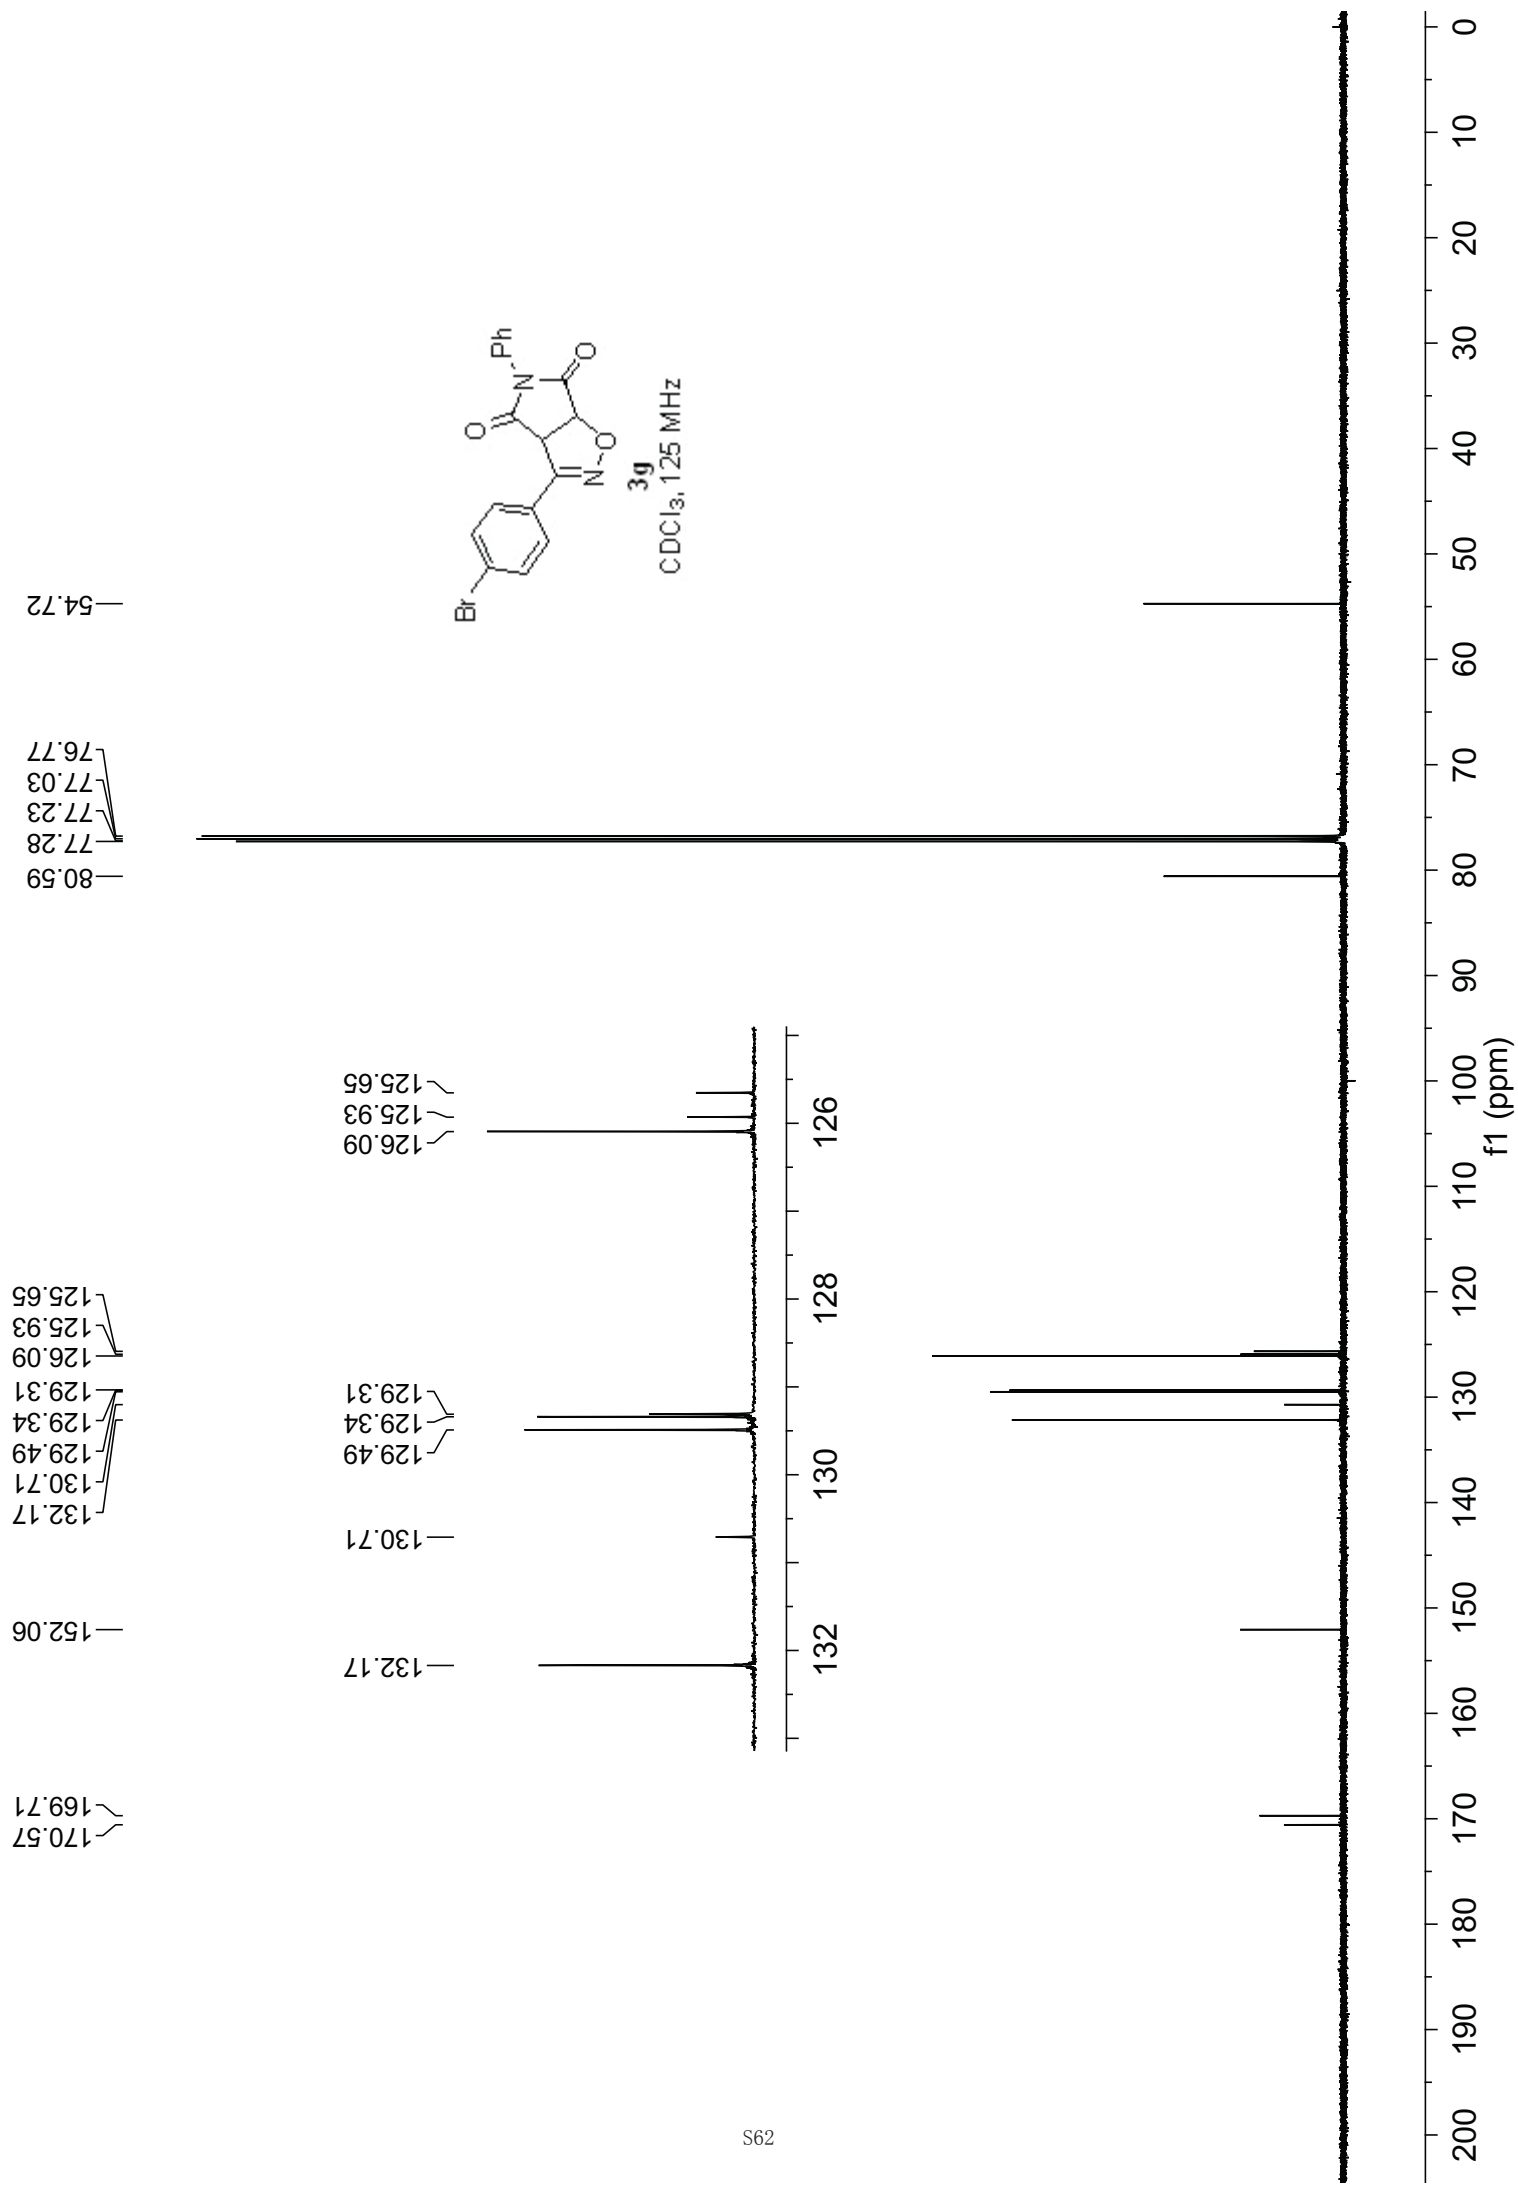

2.5003

5.4873  
5.5067  
5.8322  
5.8517

7.2835  
7.2983  
7.4195  
7.4340  
7.4481  
7.4726  
7.4882  
7.5025  
8.1990  
8.2167  
8.3534  
8.3710

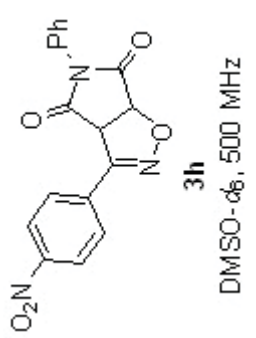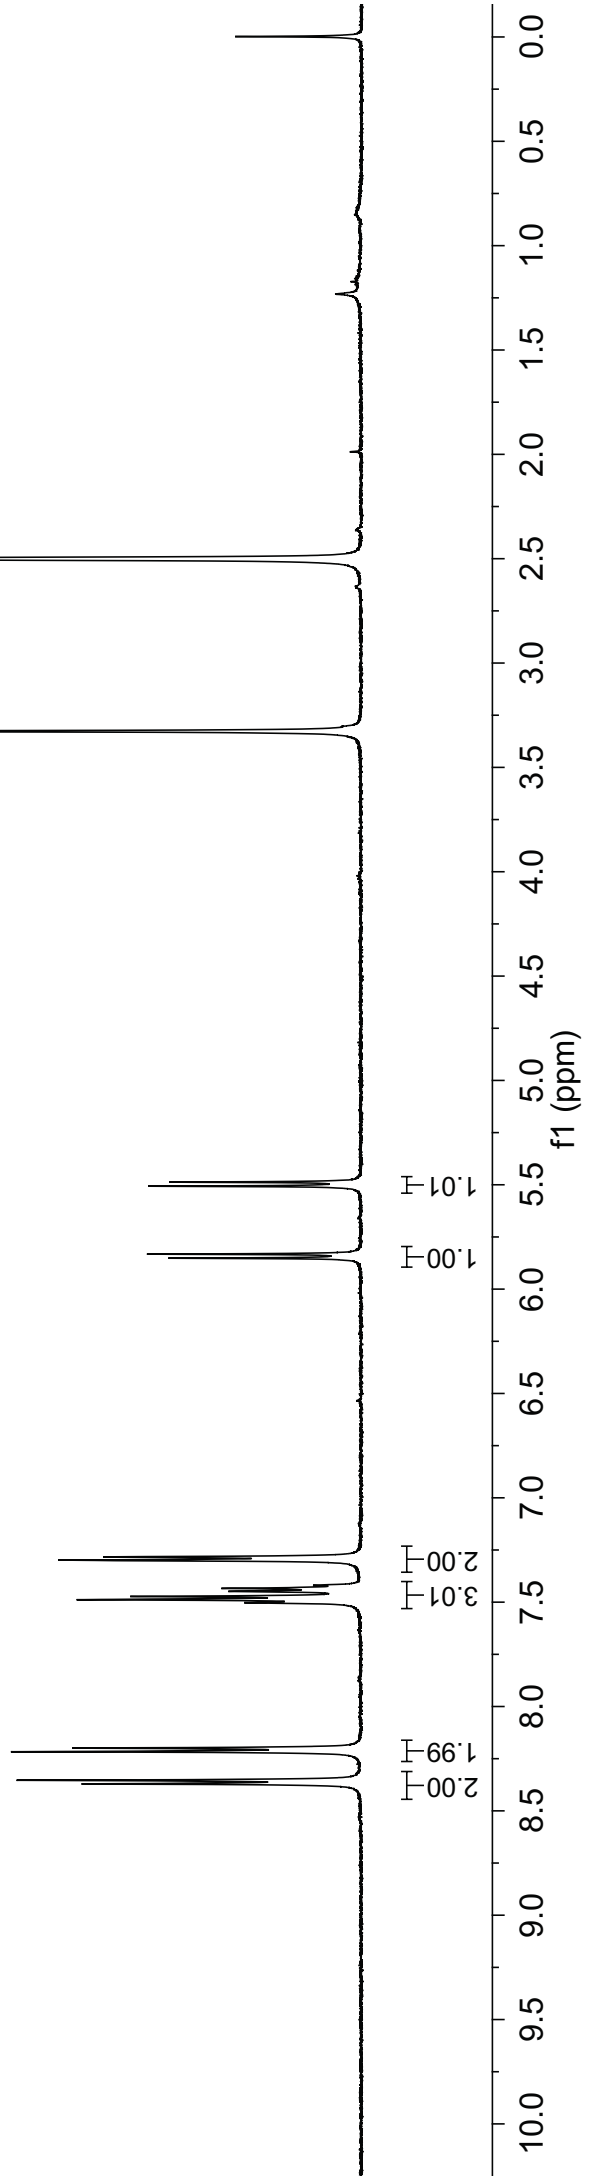

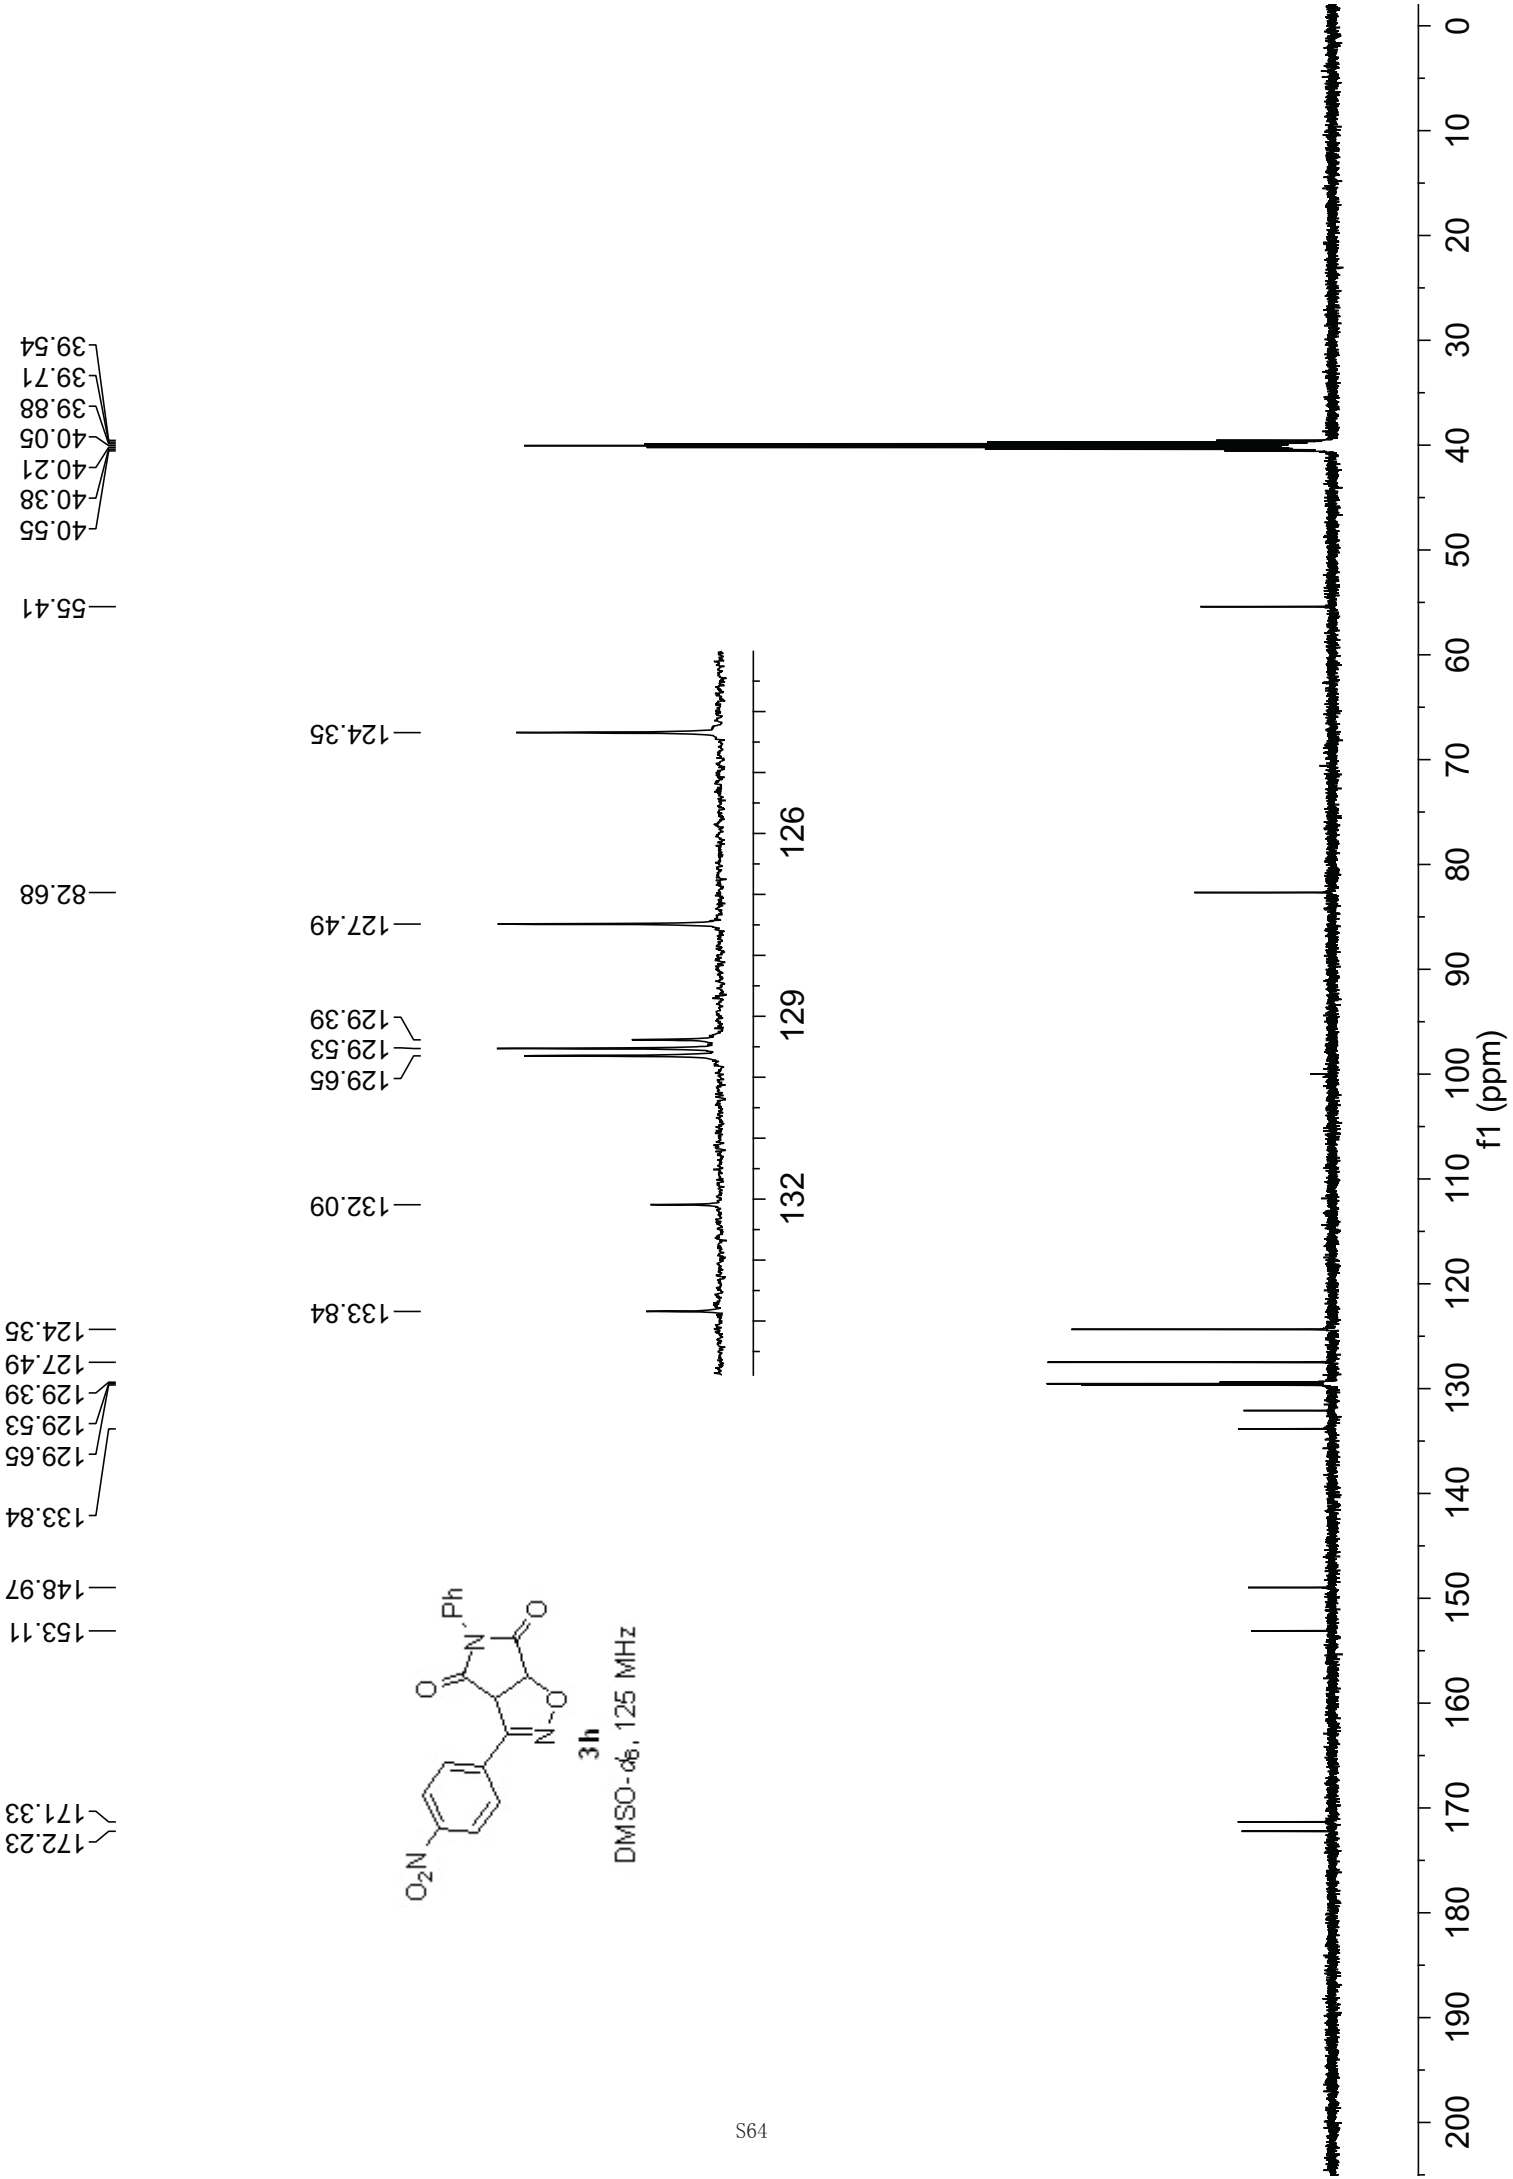



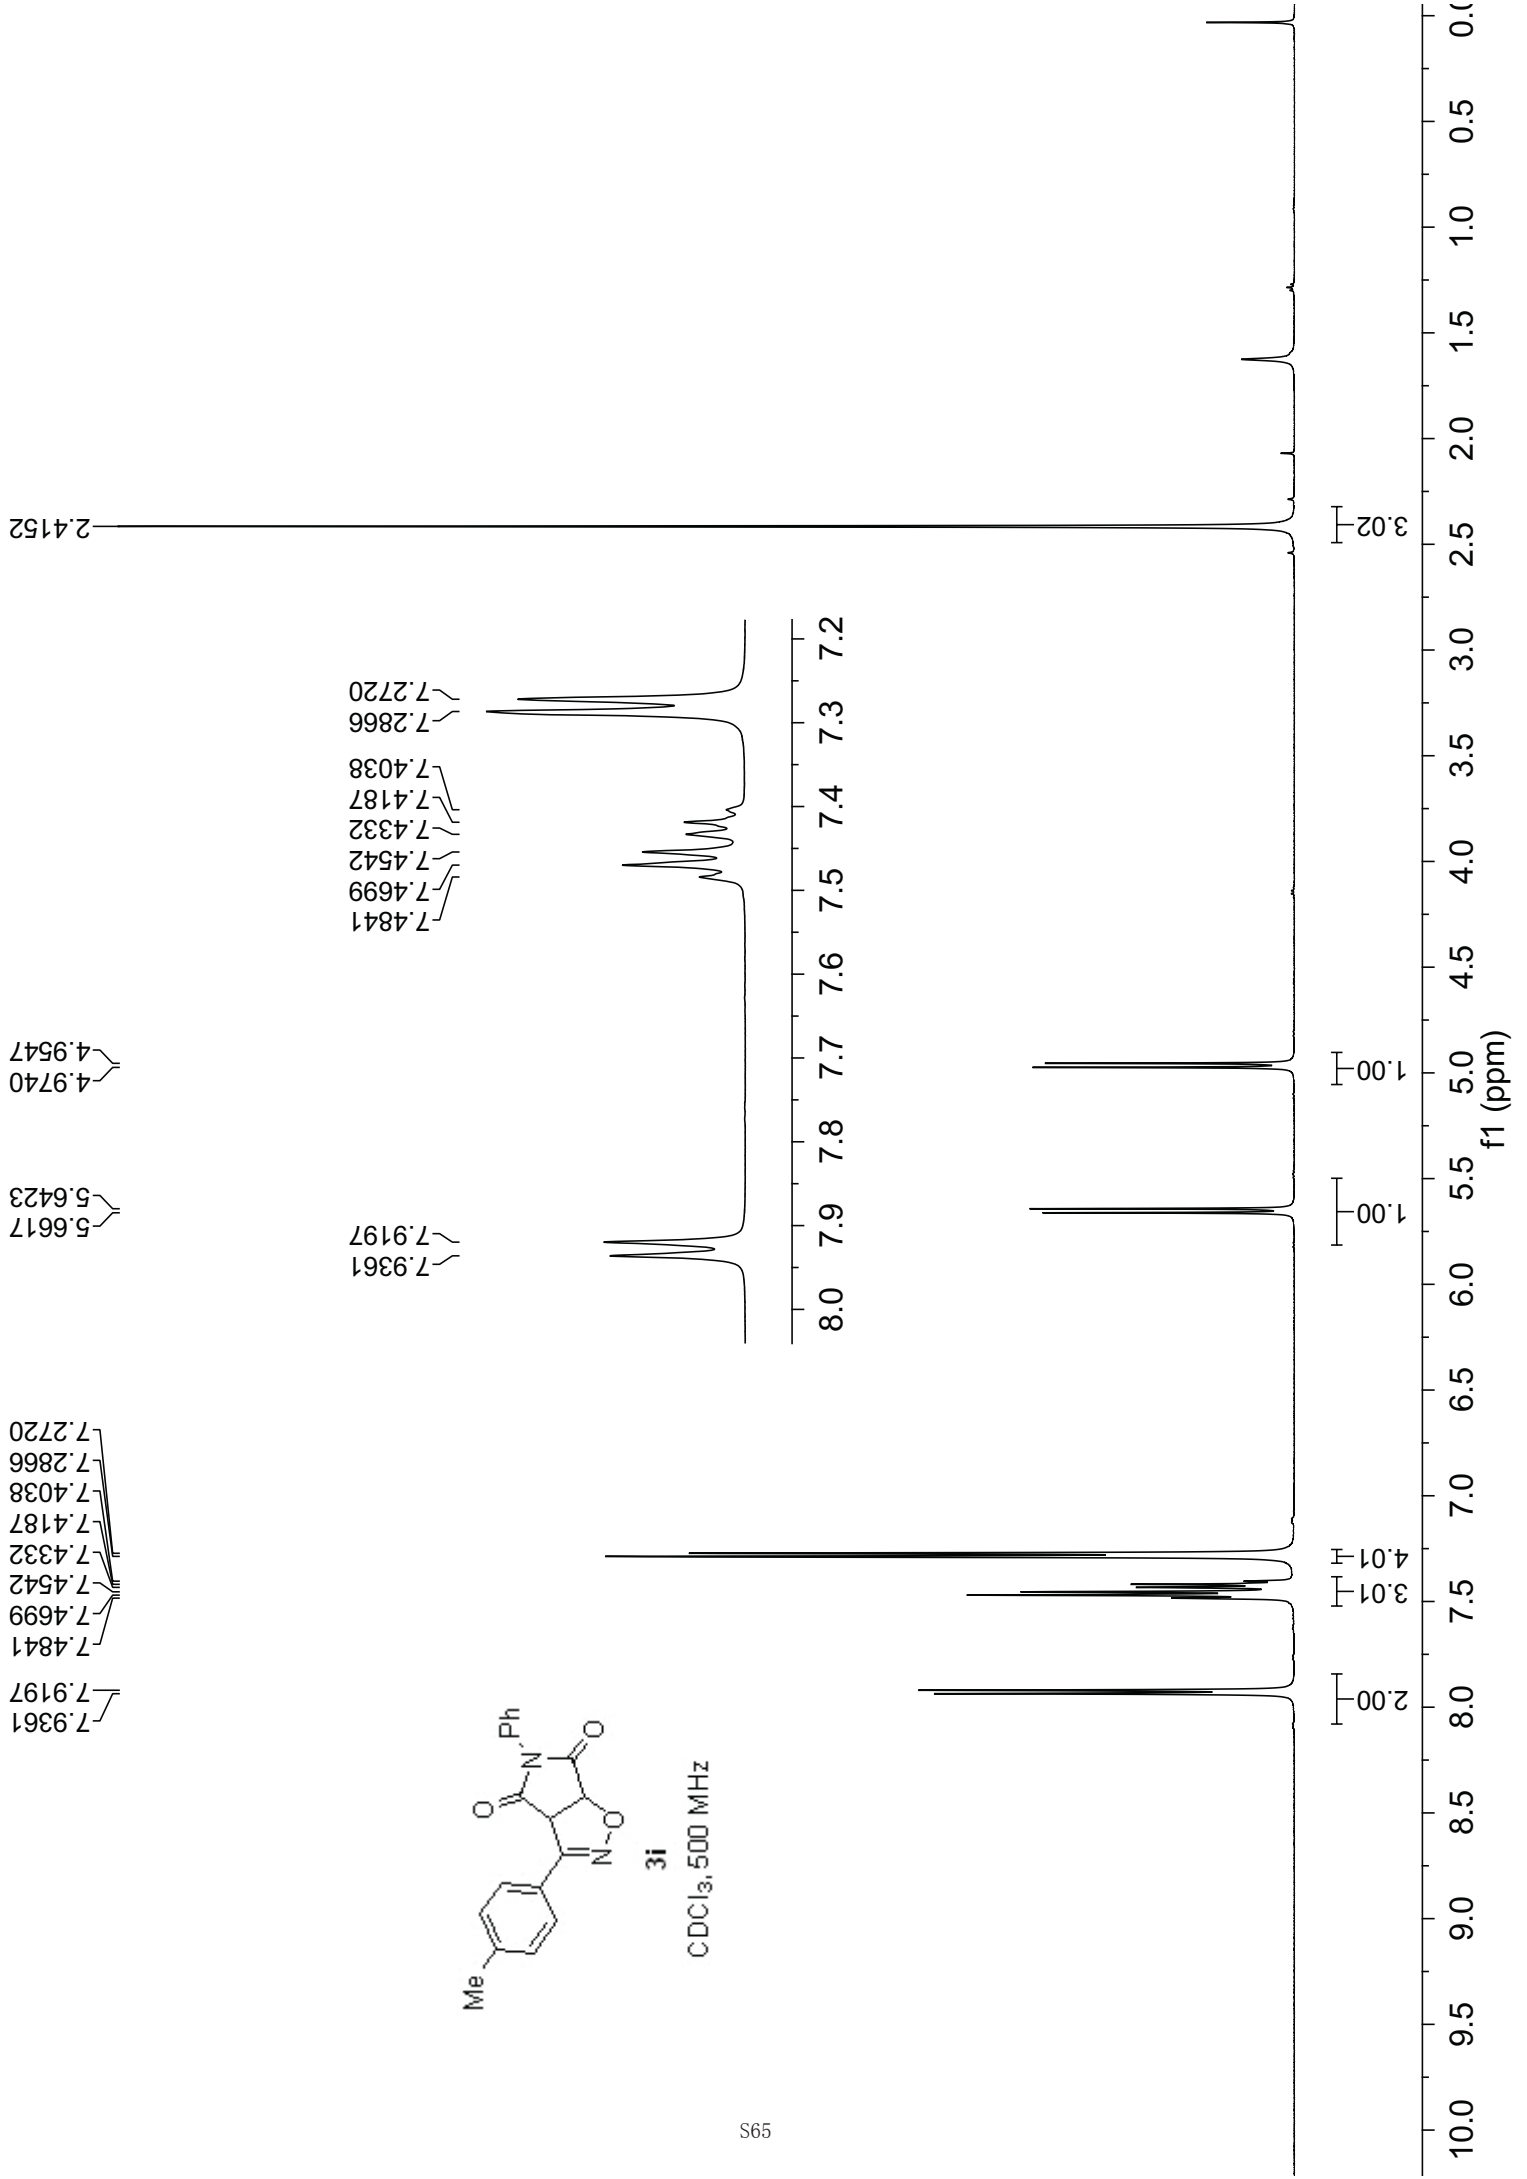





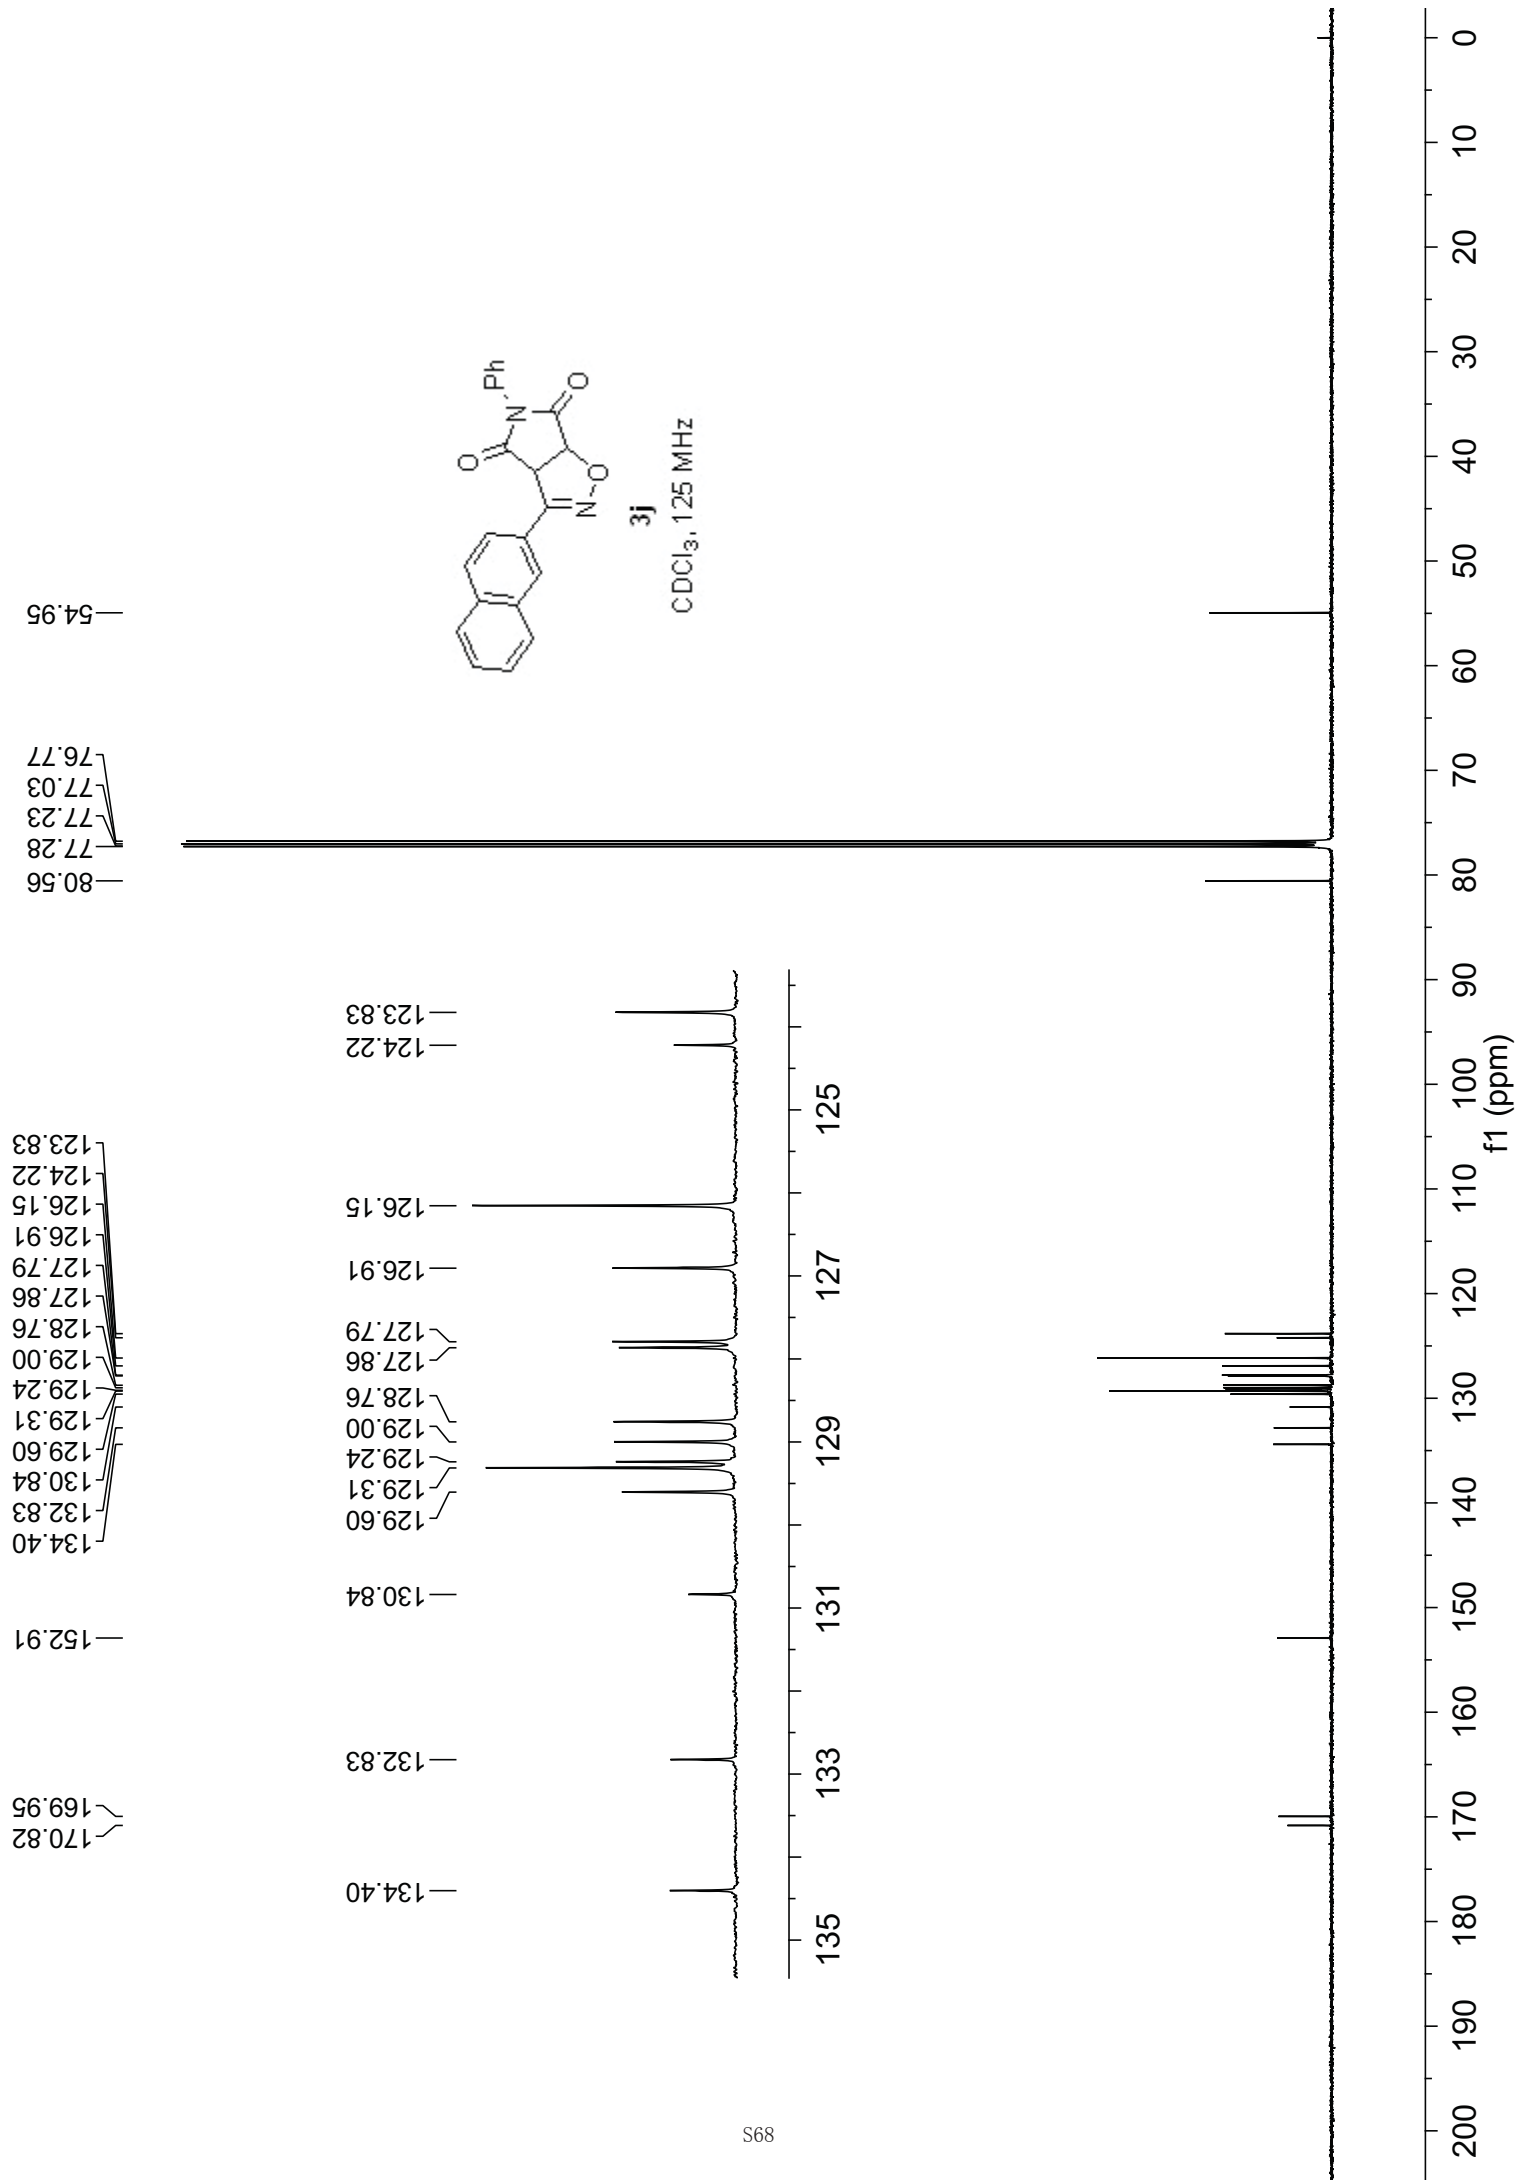

8.2968  
8.2946  
8.2798  
8.2652  
8.2633  
8.1683  
8.1655  
8.1531  
8.1495  
7.8372  
7.5657  
7.2604

8.2968  
8.2946  
8.2798  
8.2652  
8.2633  
8.1683  
8.1655  
8.1531  
8.1495  
7.8882  
7.8854  
7.8735  
7.8705  
7.8589  
7.8552  
7.8517  
7.8400  
7.8372  
7.8252  
7.8225  
7.5936  
7.5900  
7.5776  
7.5657  
7.5505  
7.5388  
7.5329

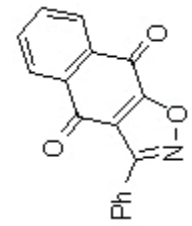

3K  
CDCl<sub>3</sub>, 500 MHz

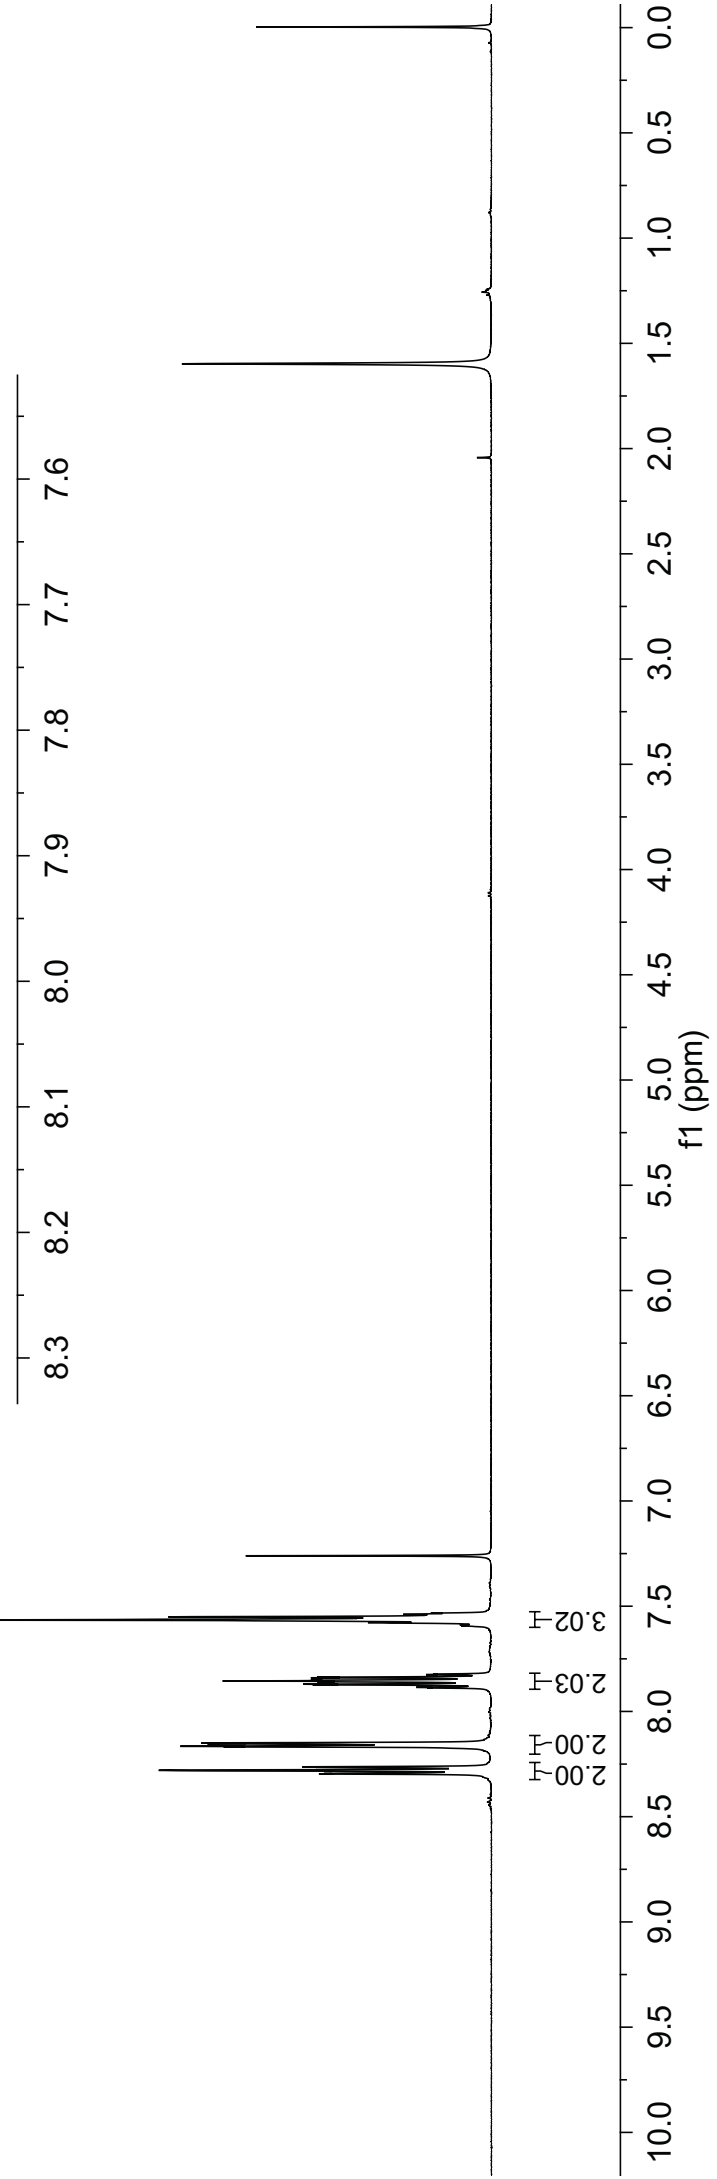

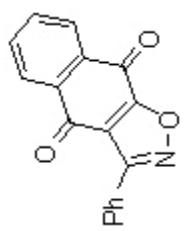

3K  
 CDCl<sub>3</sub>, 125 MHz

77.28  
 77.03  
 76.78

134.34  
 133.80  
 131.81  
 131.34  
 129.41  
 128.69  
 127.77  
 127.29  
 126.17  
 119.61

178.68  
 173.37  
 166.30  
 161.04

135.34  
 134.34  
 133.80  
 131.81  
 131.34  
 129.41  
 128.69  
 127.77  
 127.29  
 126.17

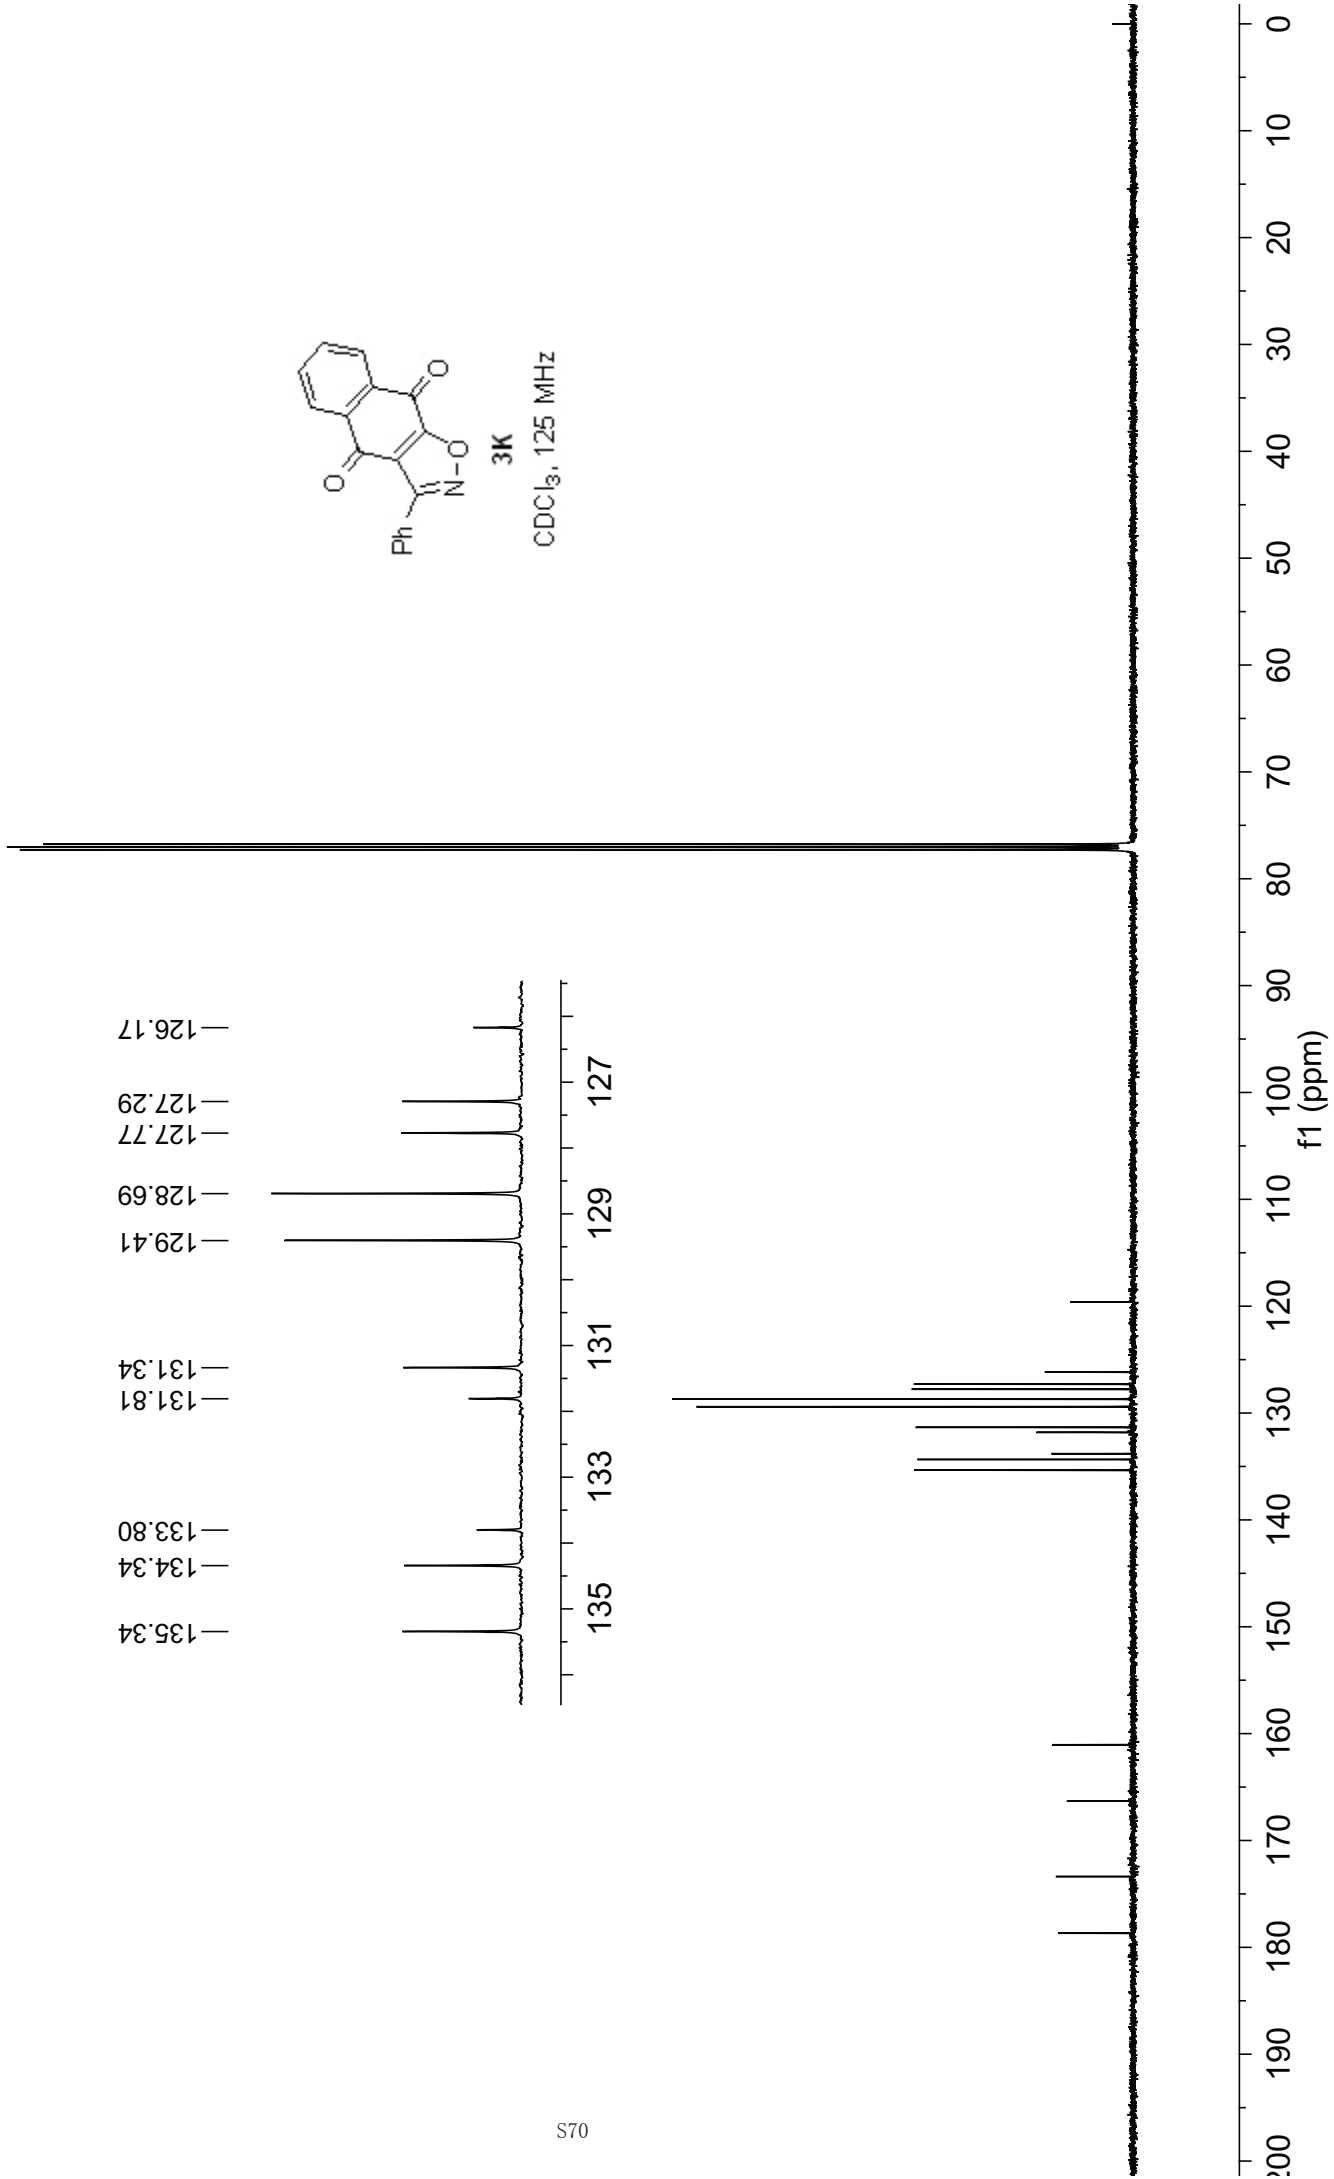

—0.0061

—1.5824

—7.2602

8.5767  
8.4807  
8.4649  
8.2979  
8.2934  
8.2917  
7.8554  
7.7091  
7.6933  
7.6777

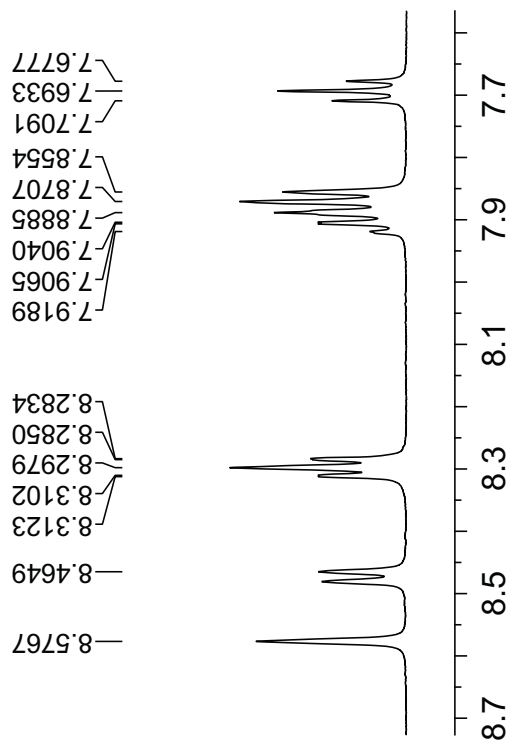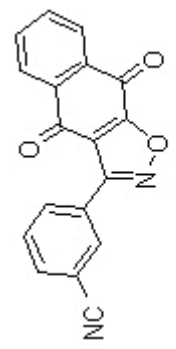

31  
CDCl<sub>3</sub>, 500 MHz

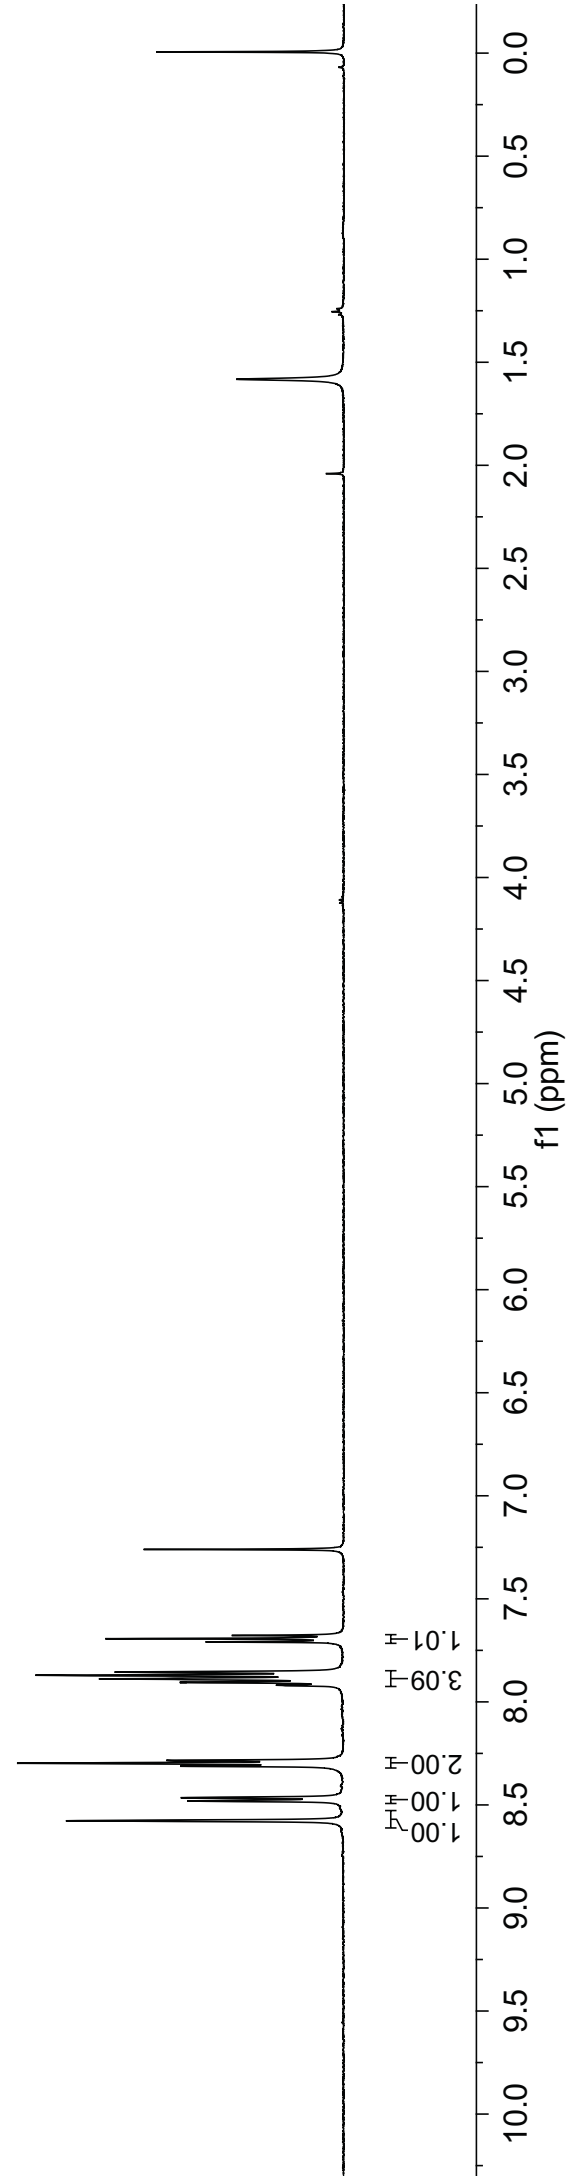

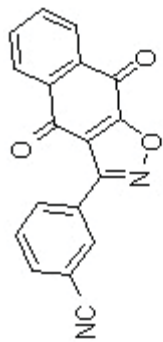

3I

CDCl<sub>3</sub>, 125 MHz

77.28  
77.03  
76.77

178.59  
173.03  
166.61  
159.25  
134.57  
133.54  
133.48  
133.00  
131.75  
131.75  
129.68  
127.92  
127.72  
127.47  
119.42  
118.04  
113.29

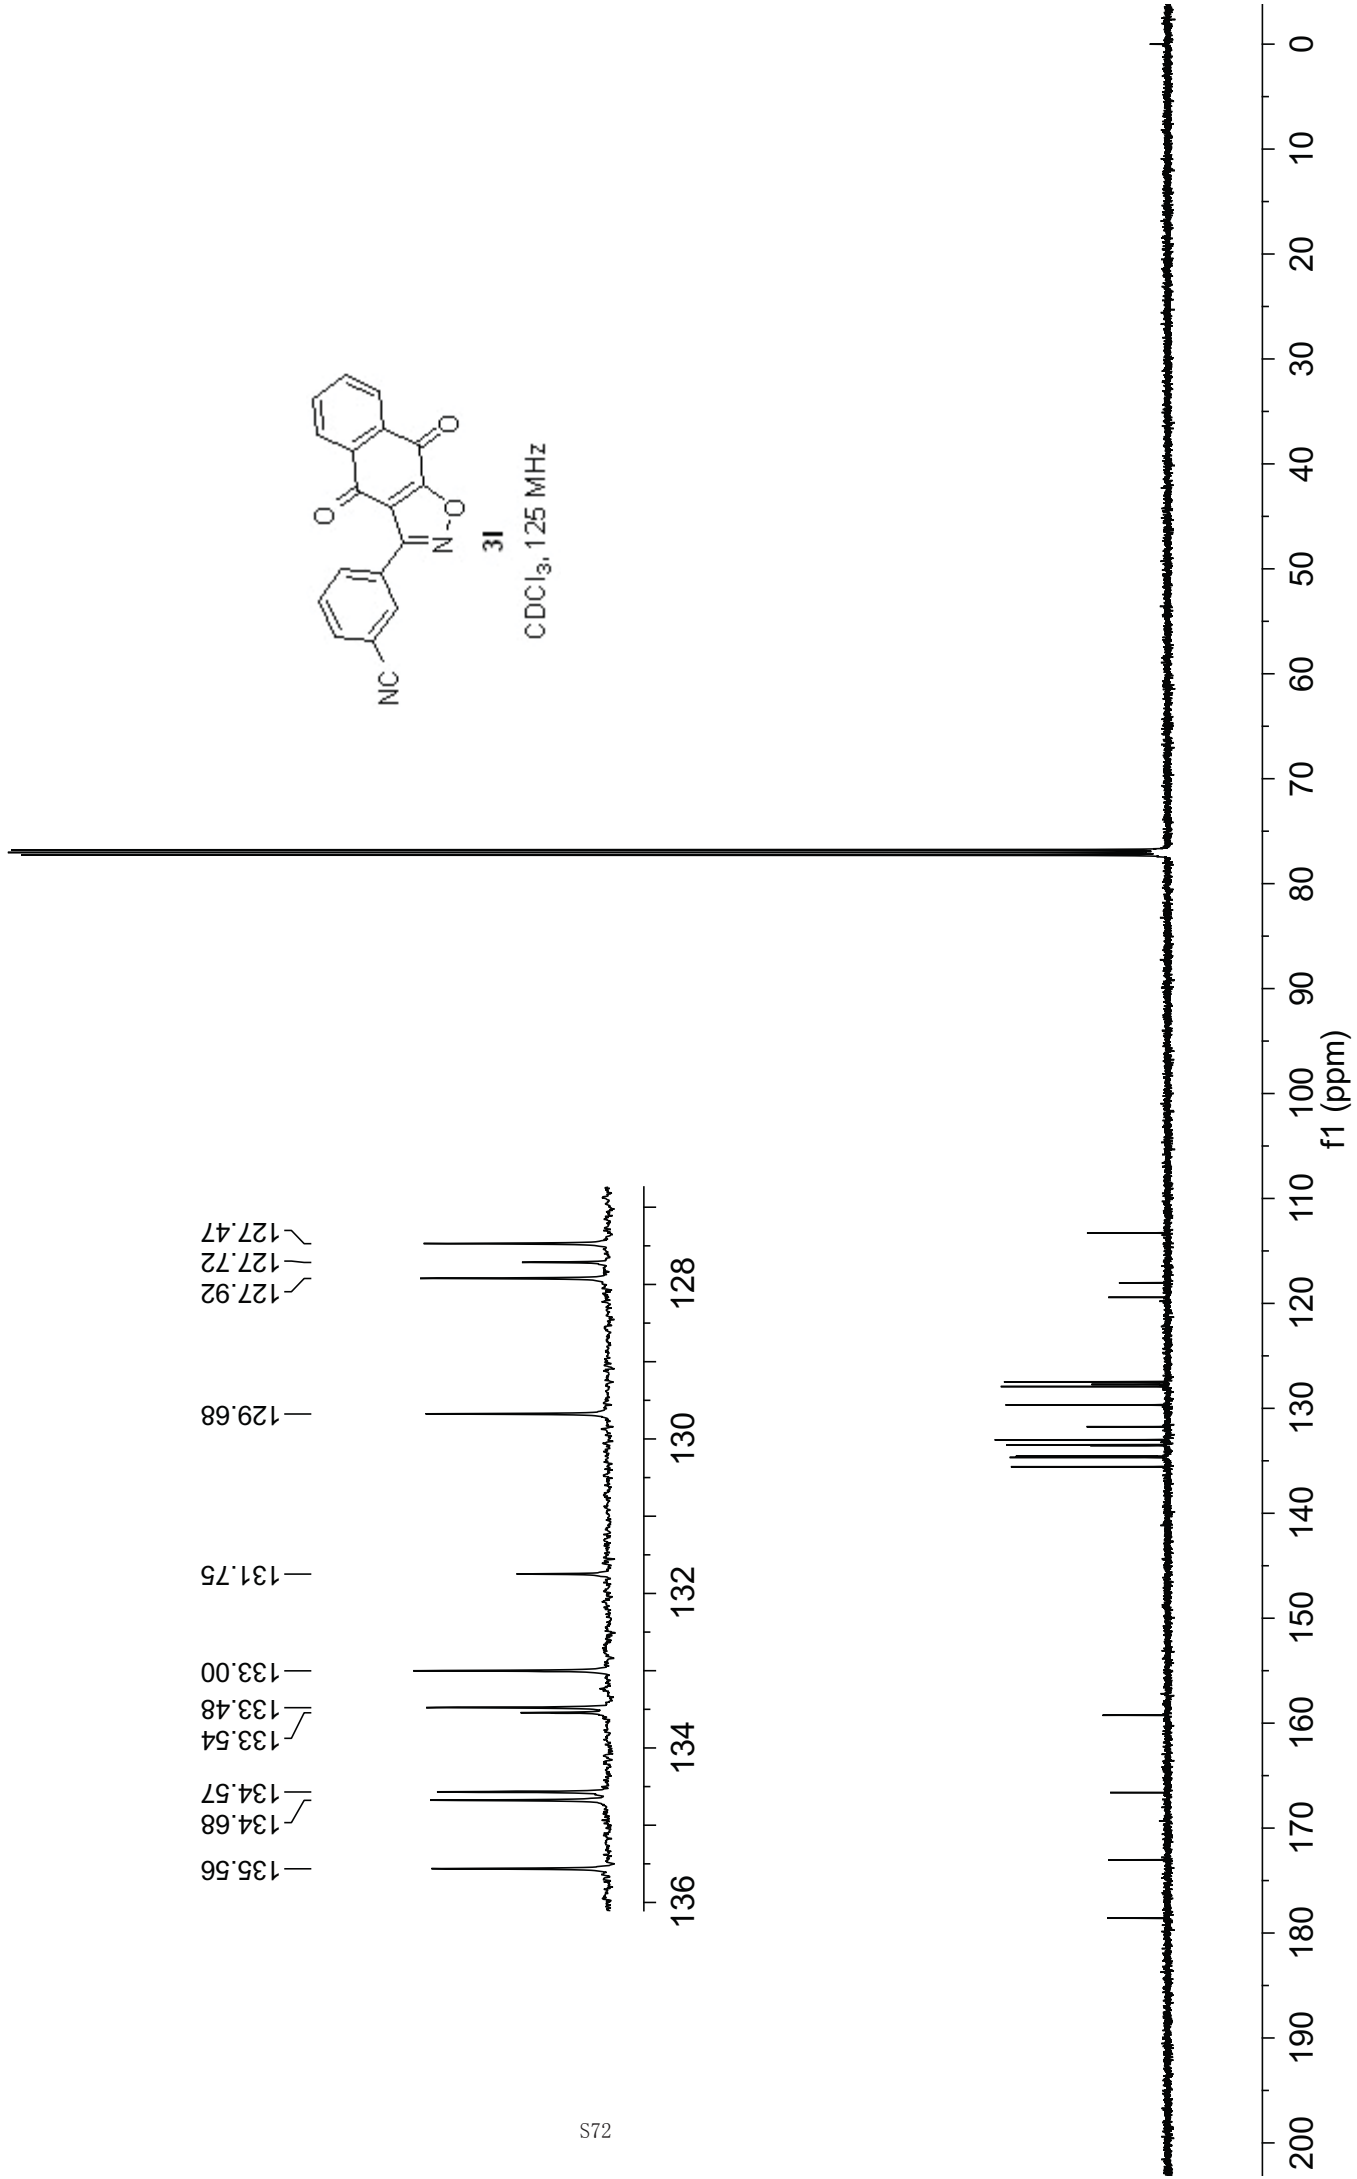



1.1916  
1.1777  
1.1637

4.1139  
4.1000  
4.0861  
4.0721

7.0406  
7.0543  
7.0564  
7.0586  
7.0695  
7.0715  
7.0844  
7.0863  
7.2603  
7.5032

7.7974  
7.8248  
8.1695  
8.1784  
8.1815  
8.1846  
8.1917  
8.1964  
8.2062  
8.2718  
8.2818  
8.2865  
8.2935  
8.2966  
8.2997  
8.3084

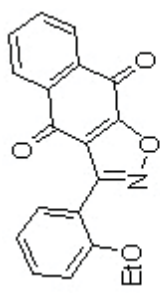

3m  
CDCl<sub>3</sub>, 500 MHz

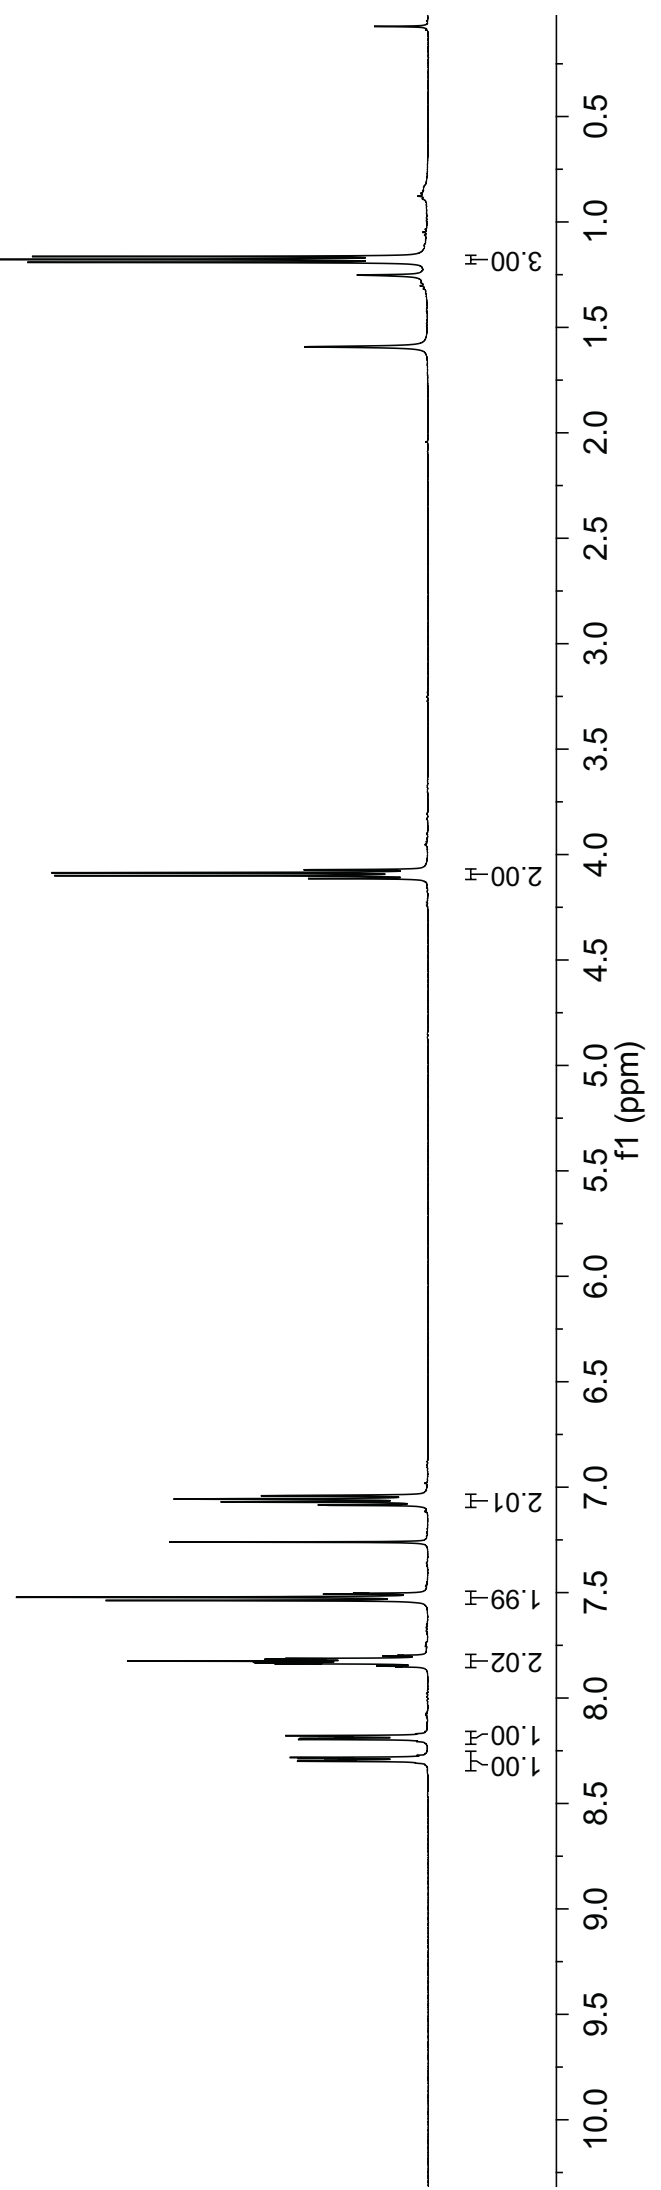

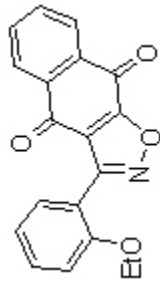

**3m**

CDCl<sub>3</sub>, 125 MHz

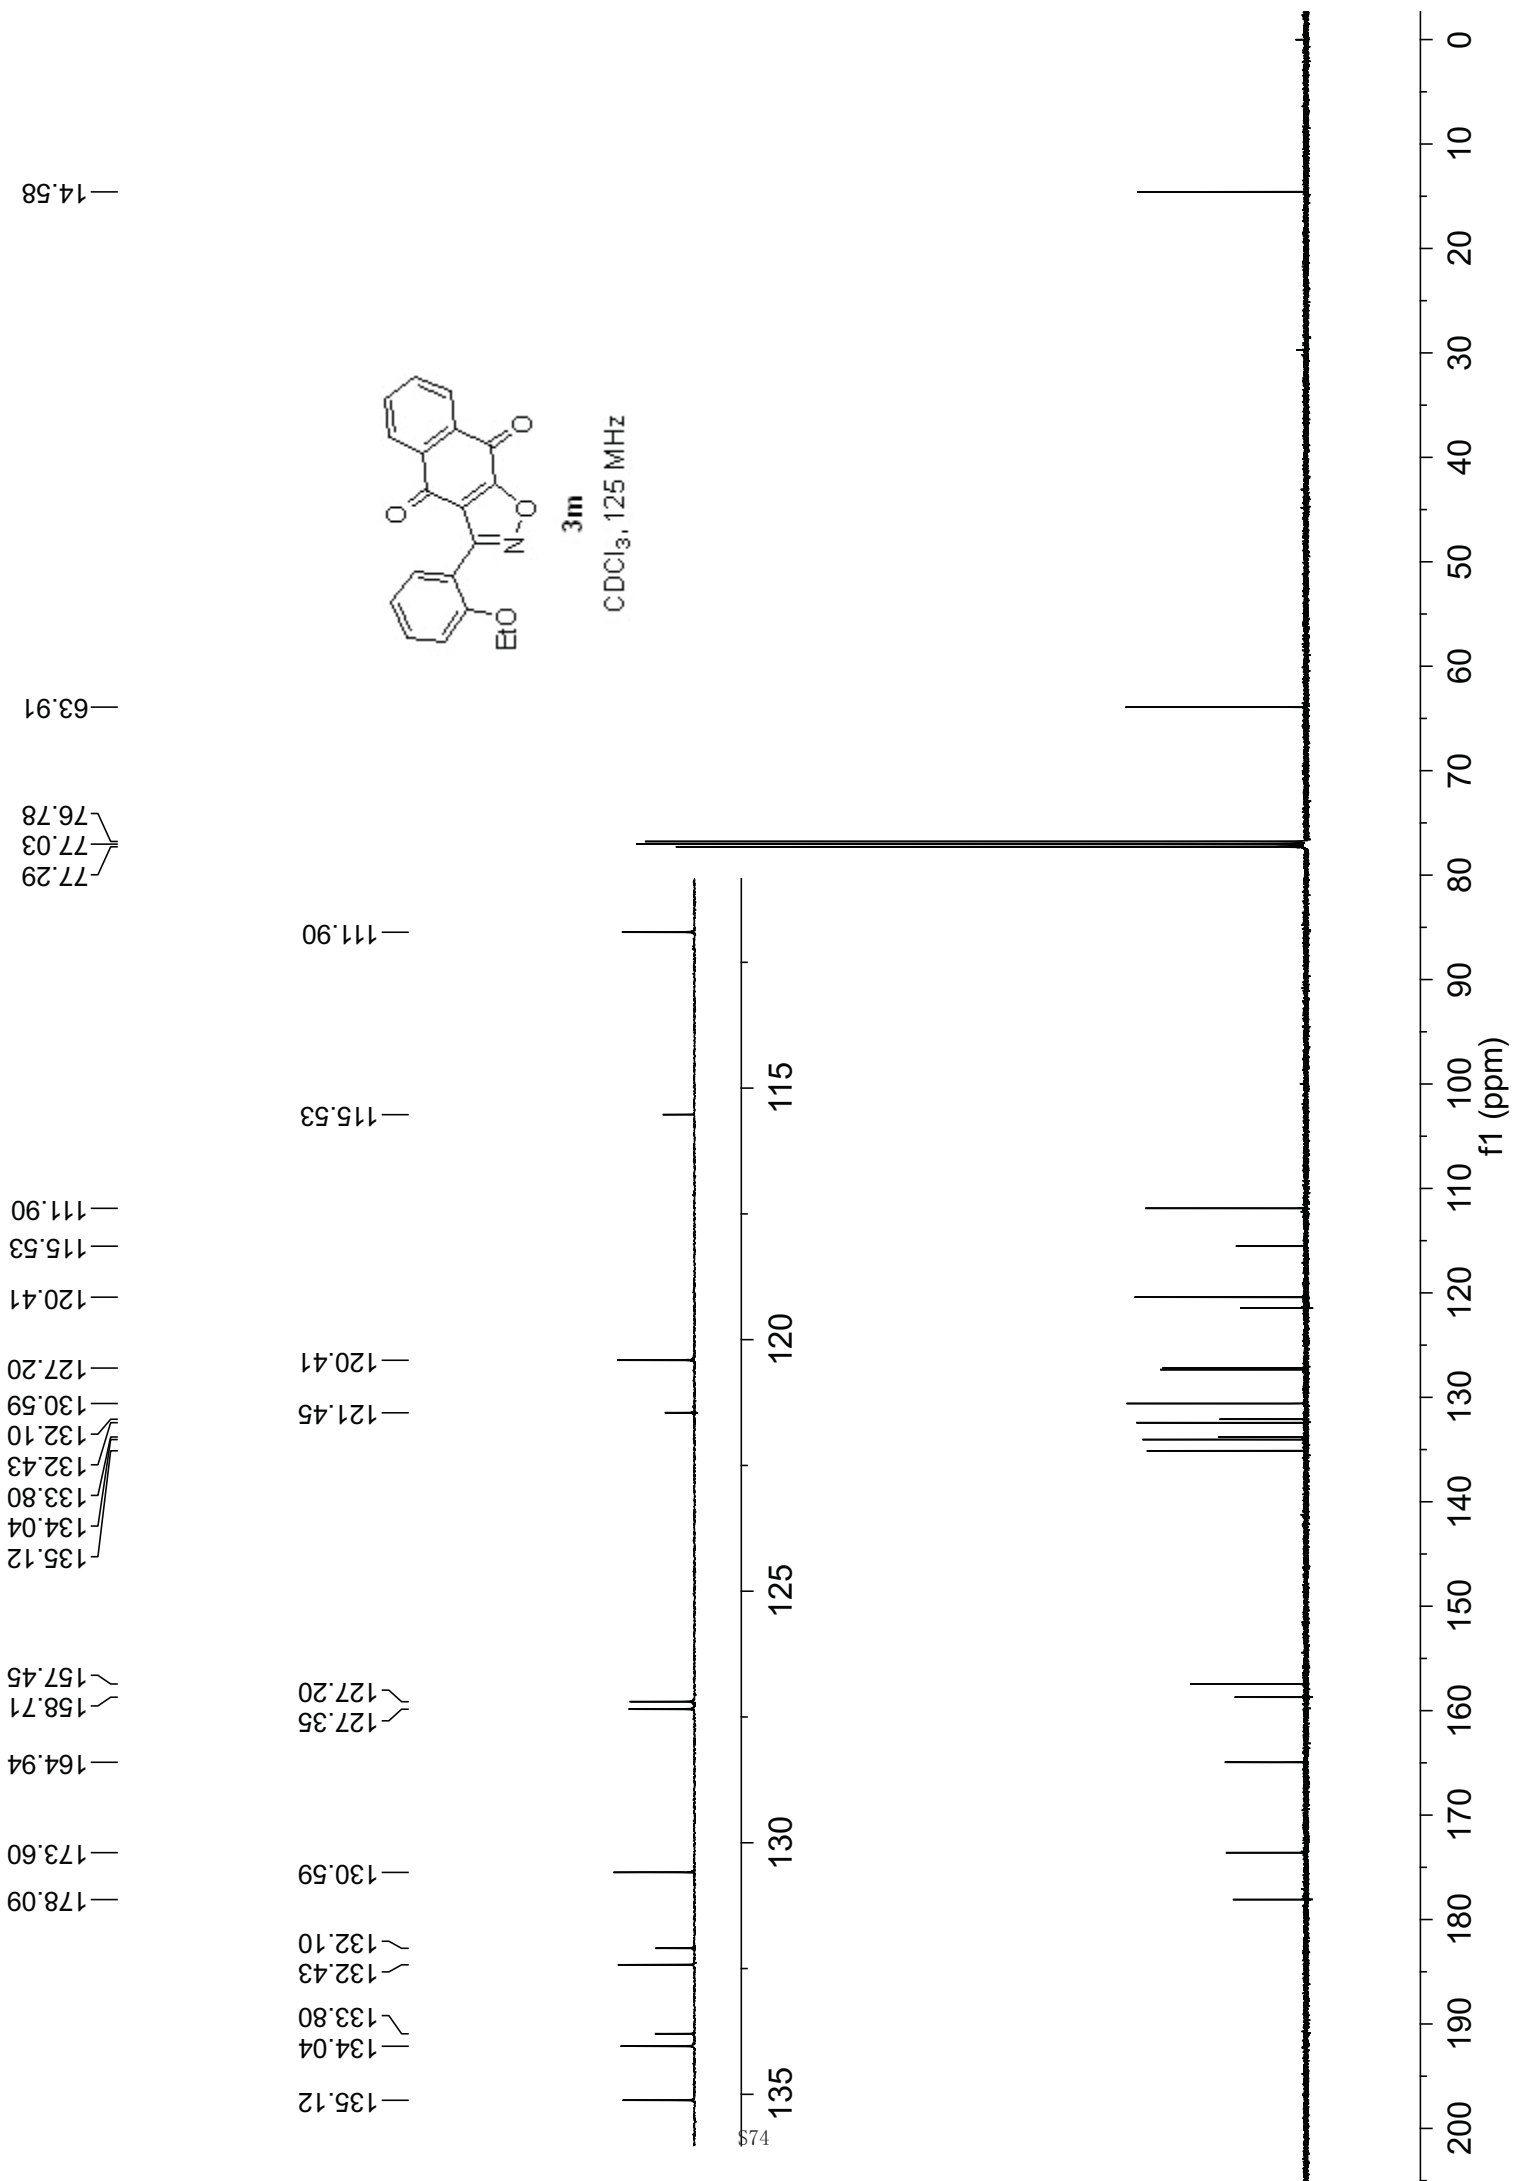



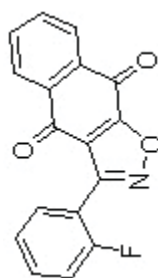

**3h**

CDCl<sub>3</sub>, 470 MHz

111.26  
111.25  
111.25  
111.24  
111.24  
111.24  
111.23  
111.23  
111.22

0 -10 -20 -30 -40 -50 -60 -70 -80 -90 -100 -110 -120 -130 -140 -150 -160 -170 -180 -190 -200  
f1 (ppm)

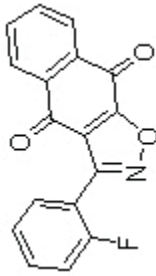

3n

CDCl<sub>3</sub>, 125 MHz

77.30  
77.05  
76.79

114.60  
114.71  
116.13  
116.30

114.60  
114.71  
116.13  
116.30  
120.60  
120.60  
124.37  
127.44  
131.15  
131.16  
131.16  
132.02  
133.03  
133.10  
134.36

120.60  
124.37  
124.40

127.44  
127.51

156.36  
159.53  
165.52  
173.20  
178.07

131.15  
131.16  
132.02  
133.03  
133.10  
134.36  
135.30

175

f1 (ppm)

8.1902  
8.1721  
8.1545  
8.0475  
8.0305  
7.9766  
7.9650  
7.9508  
7.9363  
7.8379  
7.8209

3.3362  
2.5005

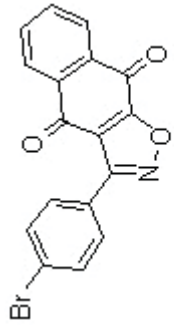

3.0

DMSO-d<sub>6</sub>, 500 MHz

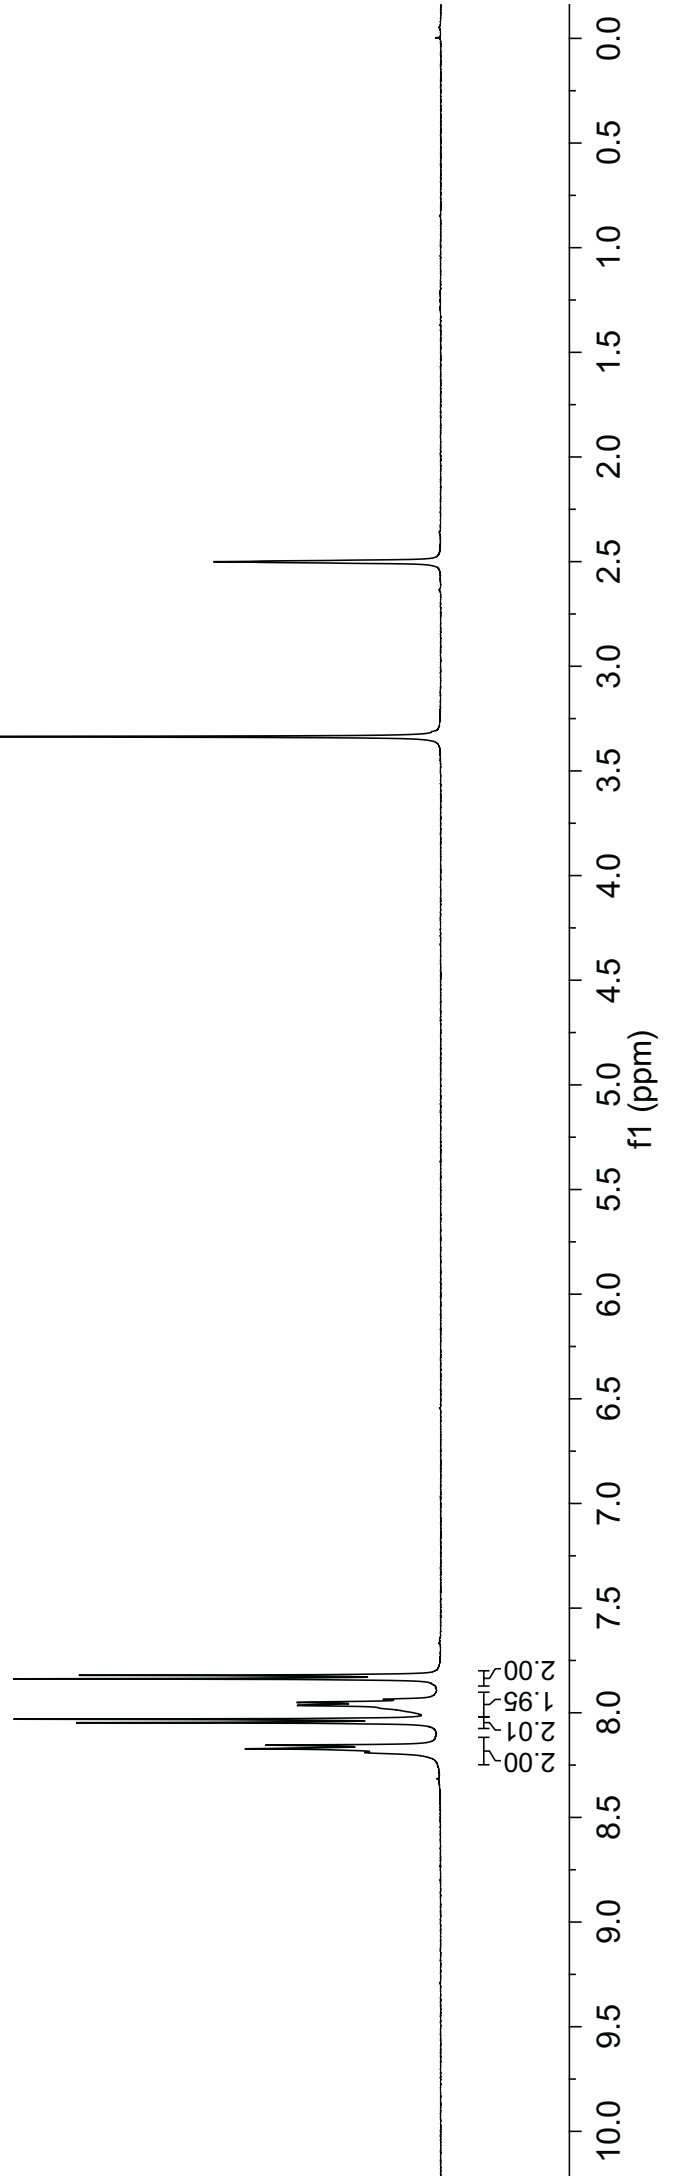

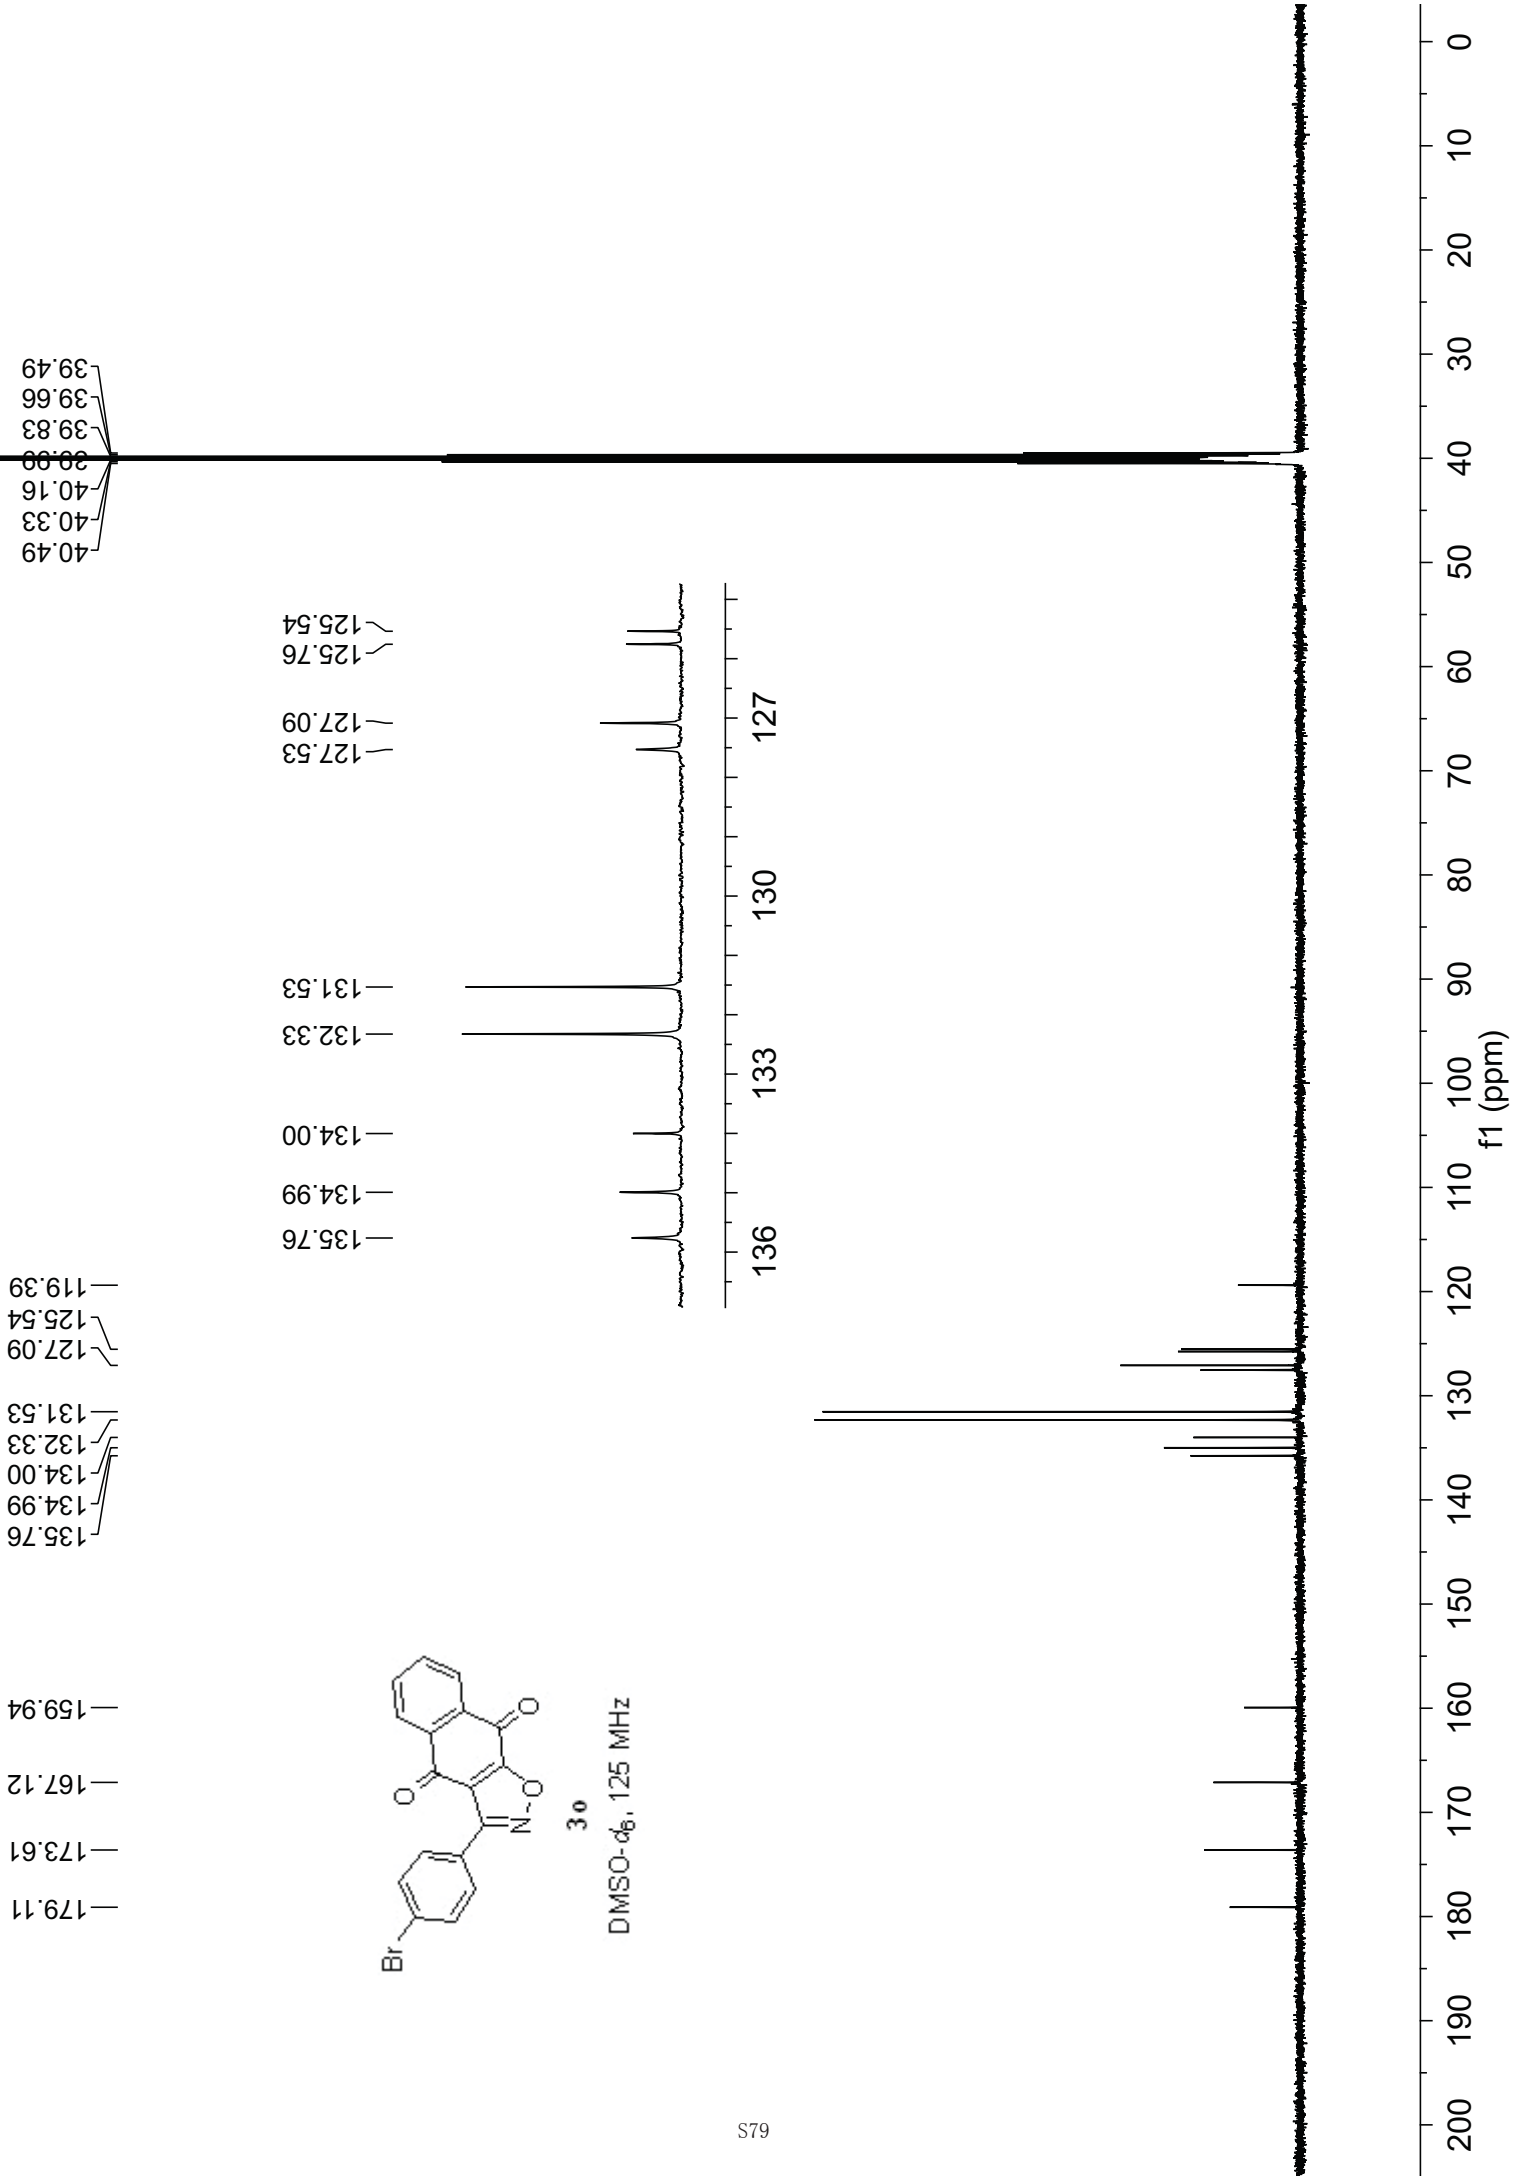

0.8562  
0.8704  
0.8841  
1.2482  
1.2743  
1.7086  
1.7239  
1.7390  
1.7523  
1.7689

3.5838  
3.5985  
3.6124  
3.6236  
3.6270  
3.6393  
3.6427  
3.6542  
3.6674  
3.6827

5.5121  
5.5329  
5.7158  
5.7366

7.2600  
7.4646  
7.7597  
7.7631  
7.7674  
7.7728  
7.7763  
7.7790  
7.7842

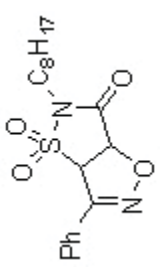

**3p**

CDCl<sub>3</sub>, 500 MHz

3.01  
10.08  
2.02  
2.06  
1.00  
1.00  
3.00  
2.00

f1 (ppm)



160.14  
151.14  
131.69  
129.29  
127.30  
126.46

82.73  
77.05  
76.79  
69.64

41.20  
31.70  
28.89  
27.96  
26.60  
22.60  
14.08

31.70  
29.02  
28.89  
27.96  
26.60

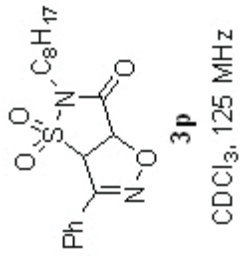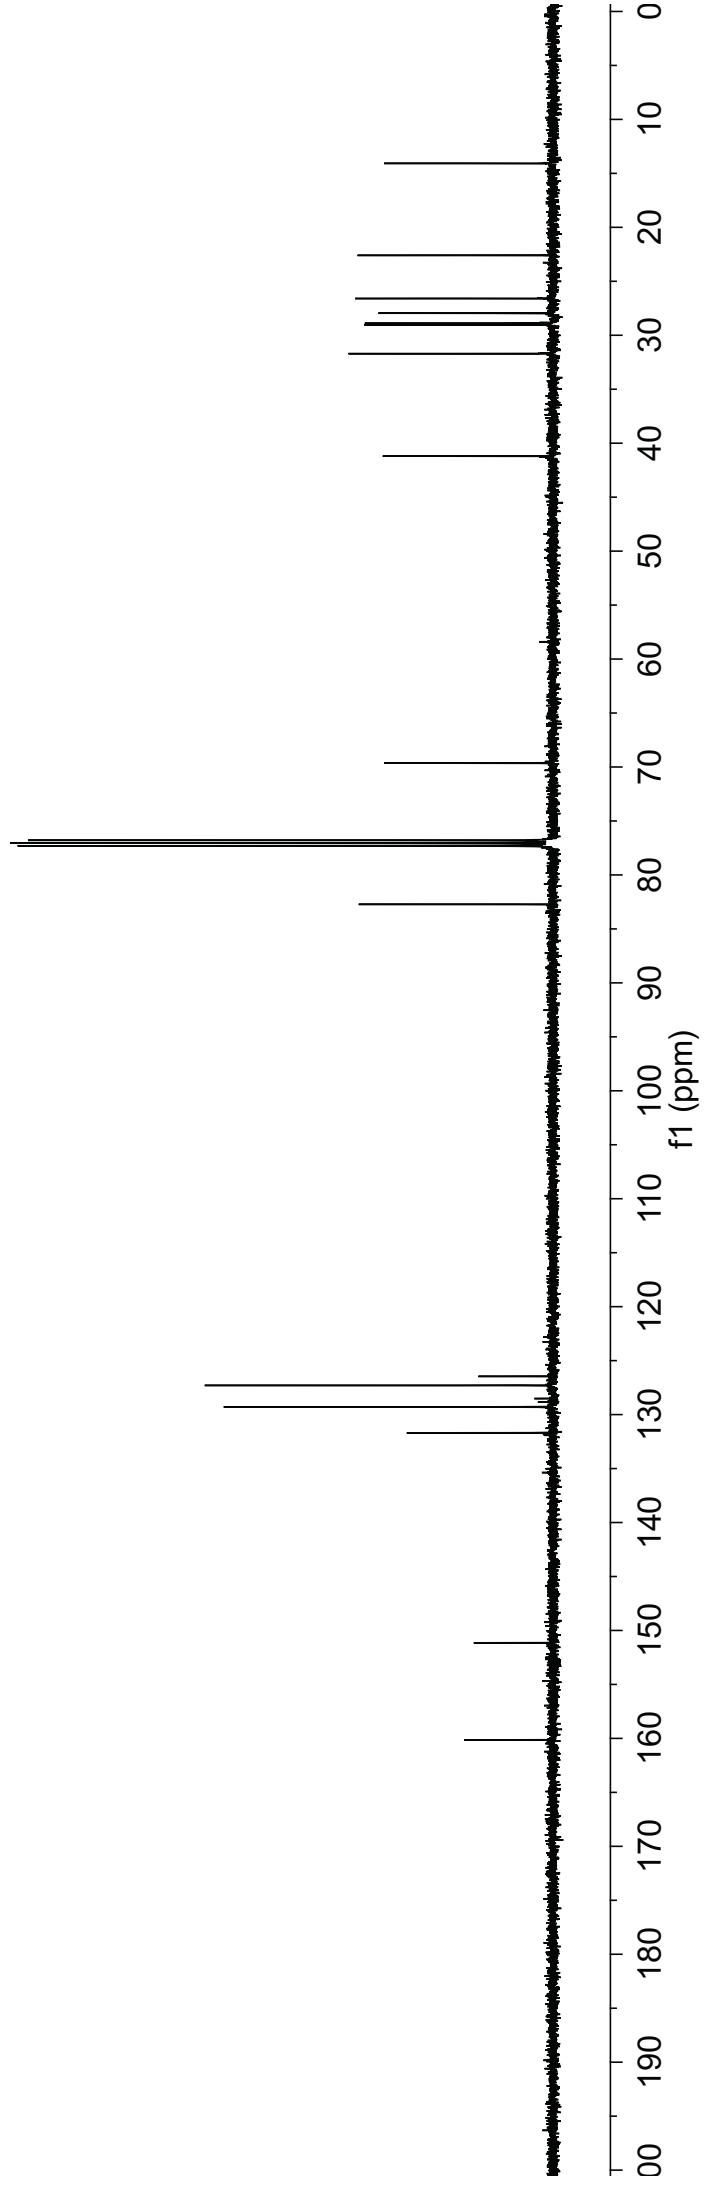

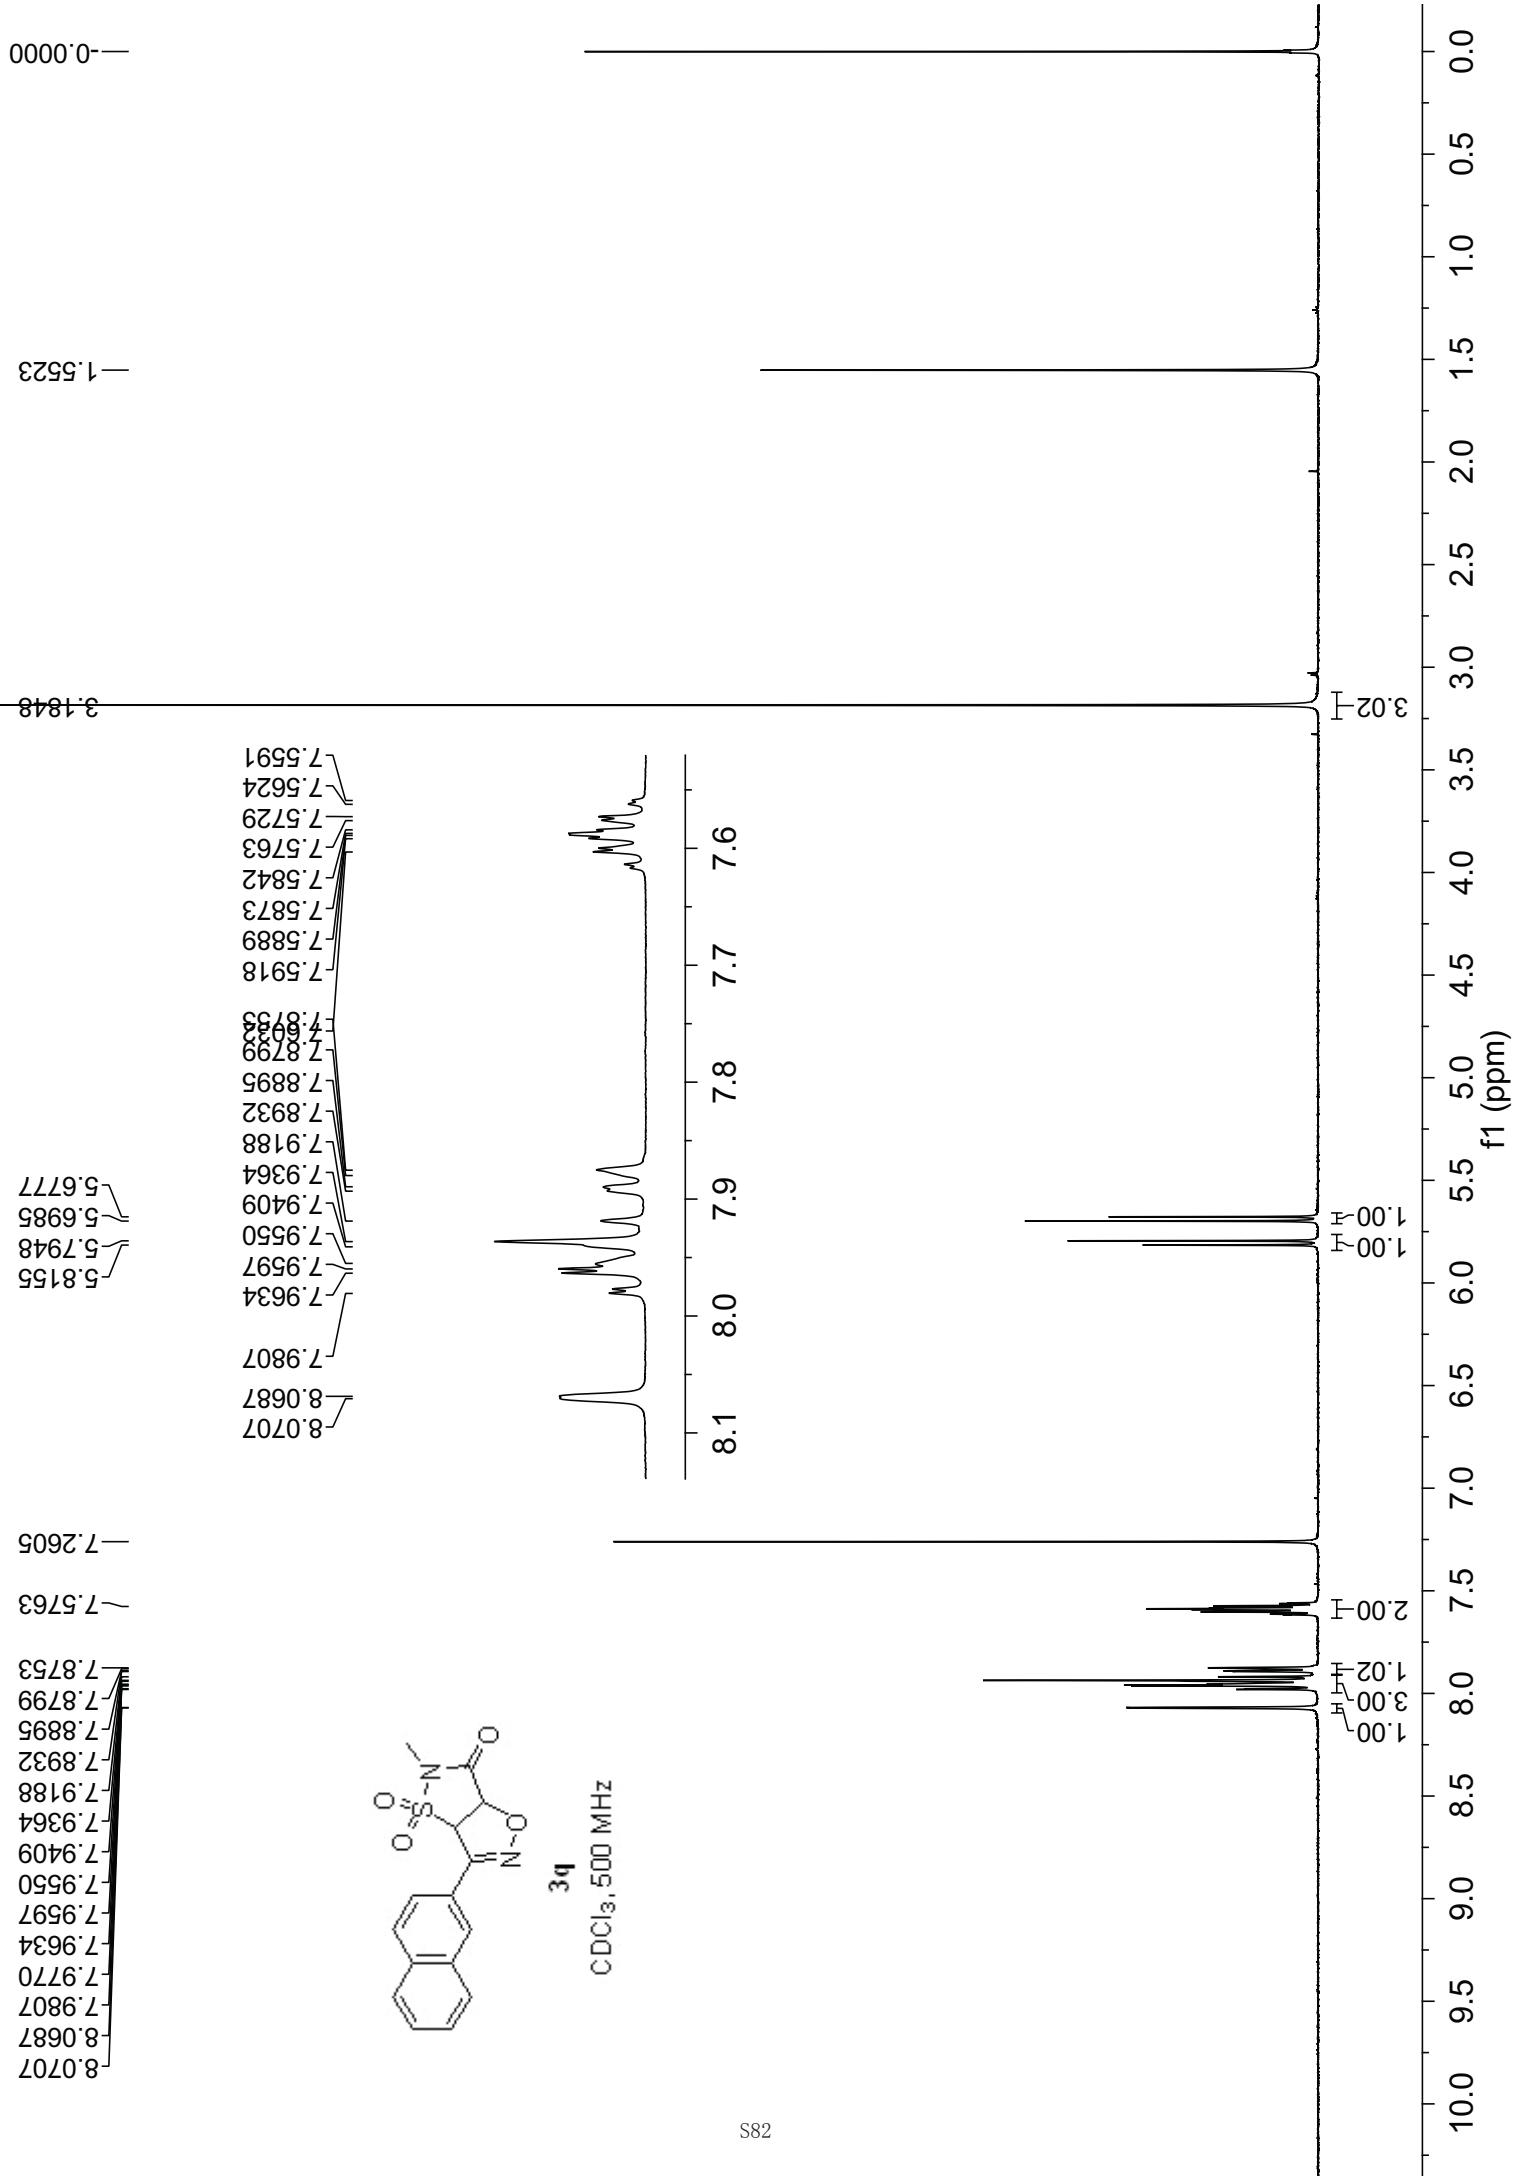

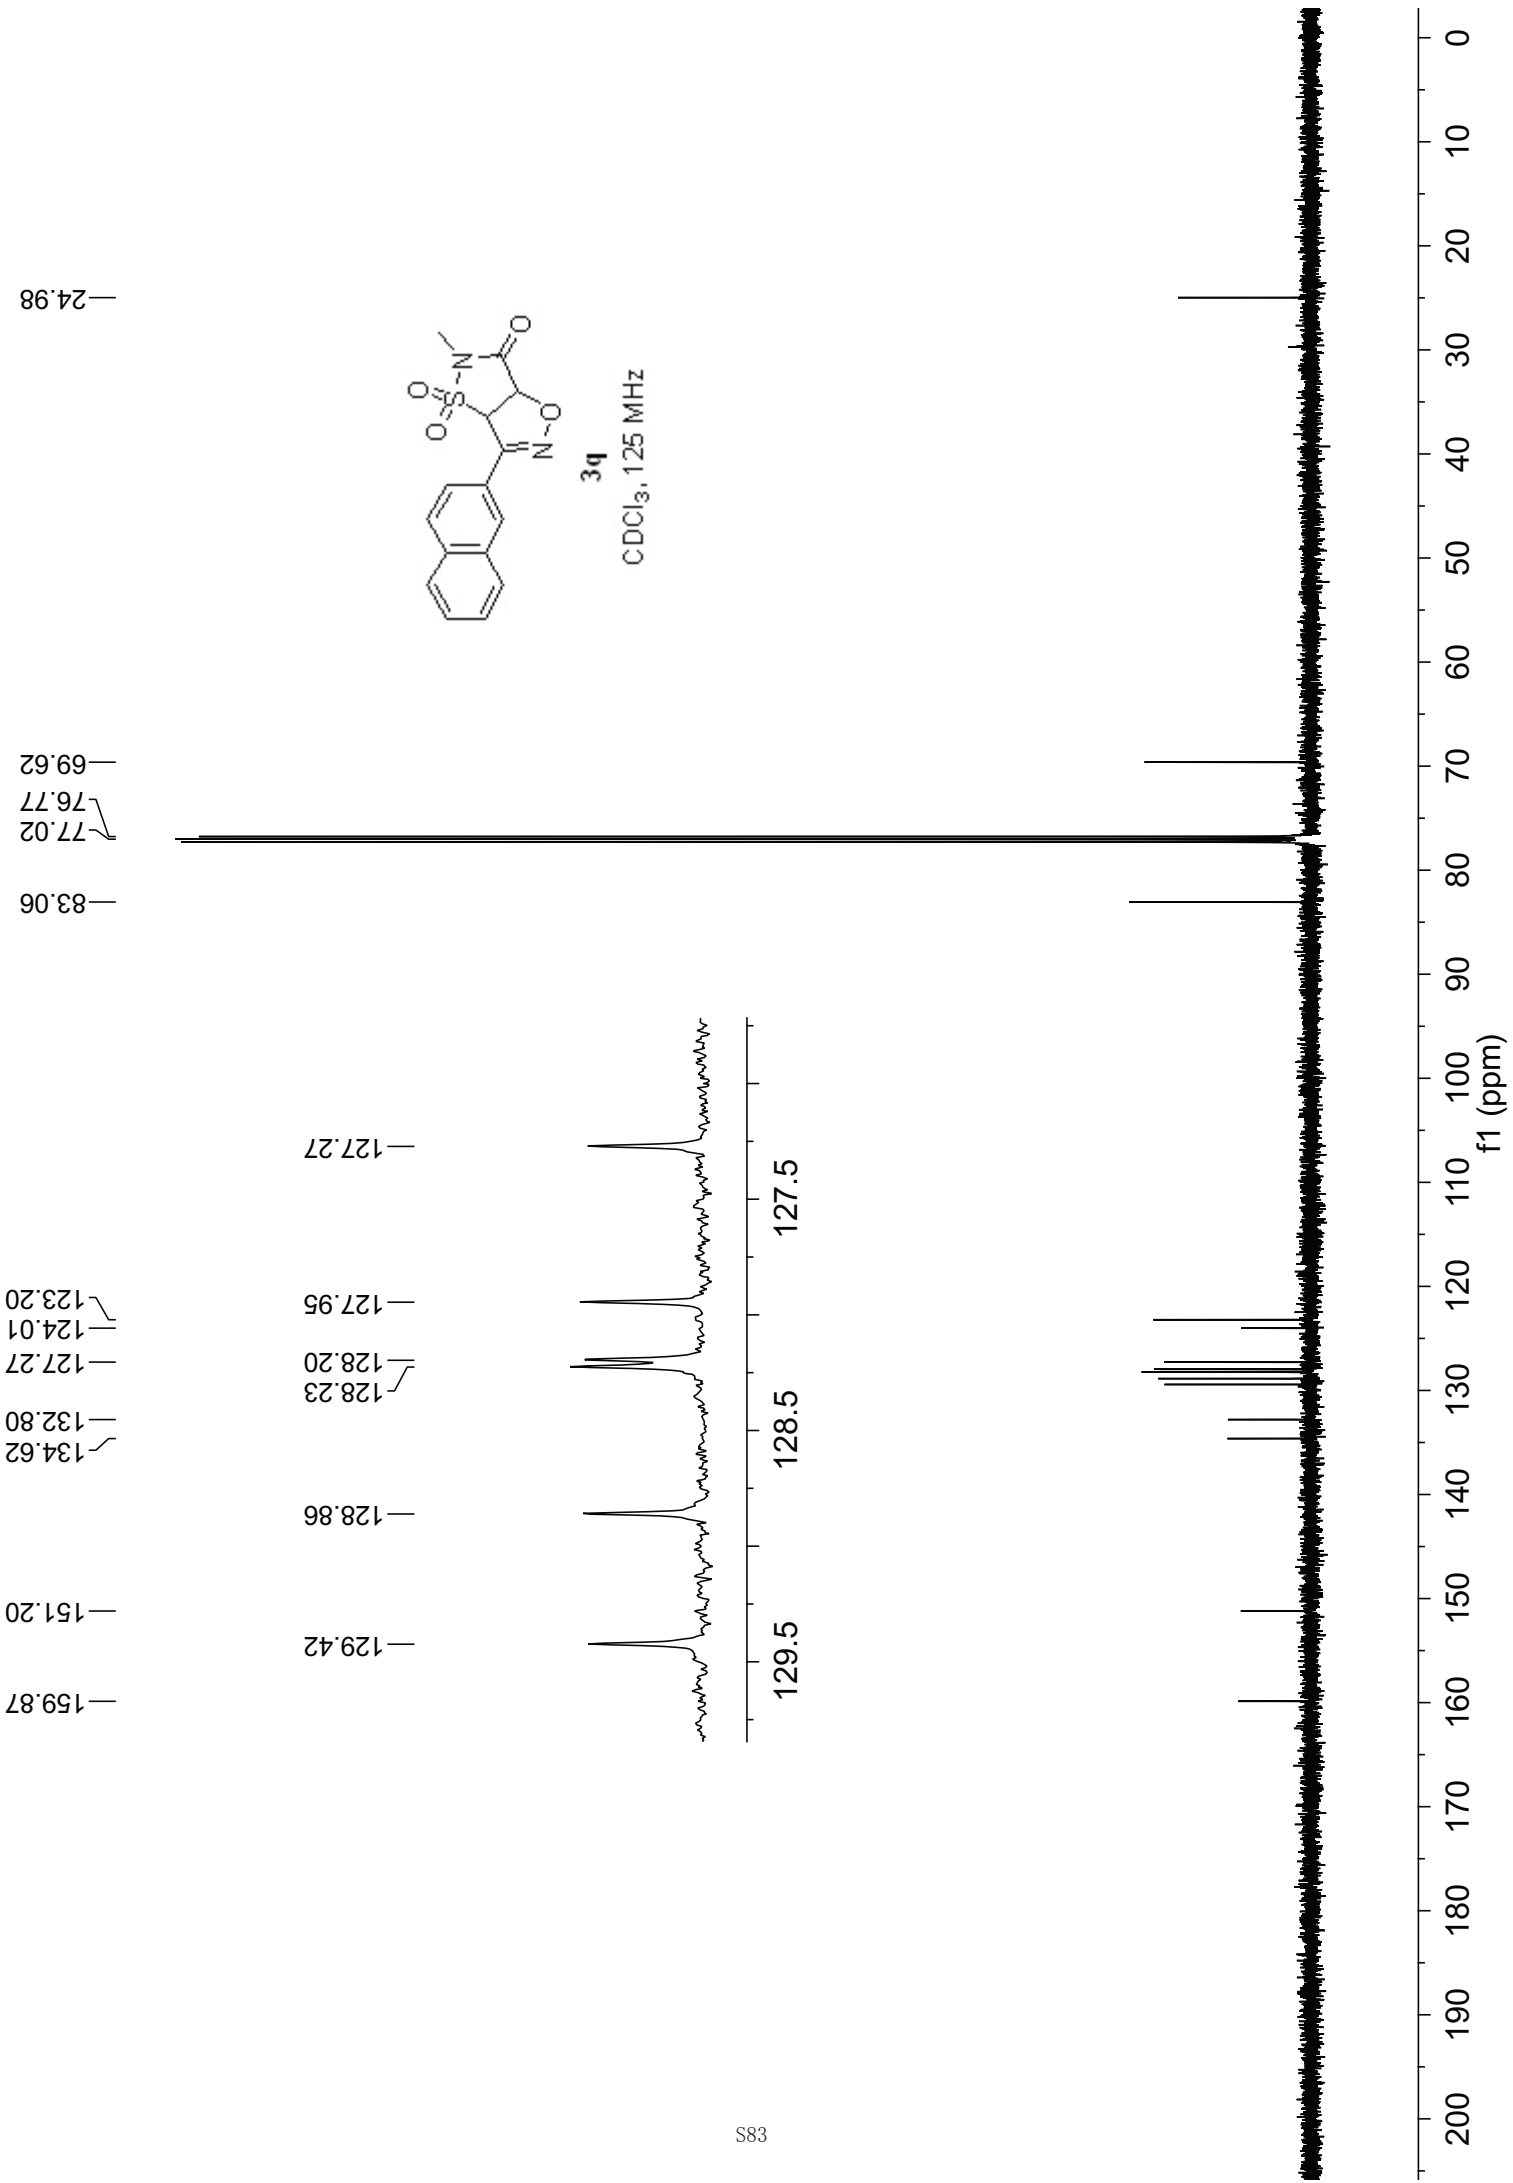

—0.0035

—1.9864

2.4965  
2.4999  
2.5034

—3.0376

—3.3258

6.1115  
6.1321

6.5924  
6.6129

8.0380  
8.0559

8.3935  
8.4113

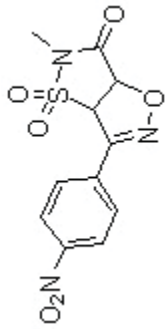

3r

DMSO-d<sub>6</sub>, 500 MHz

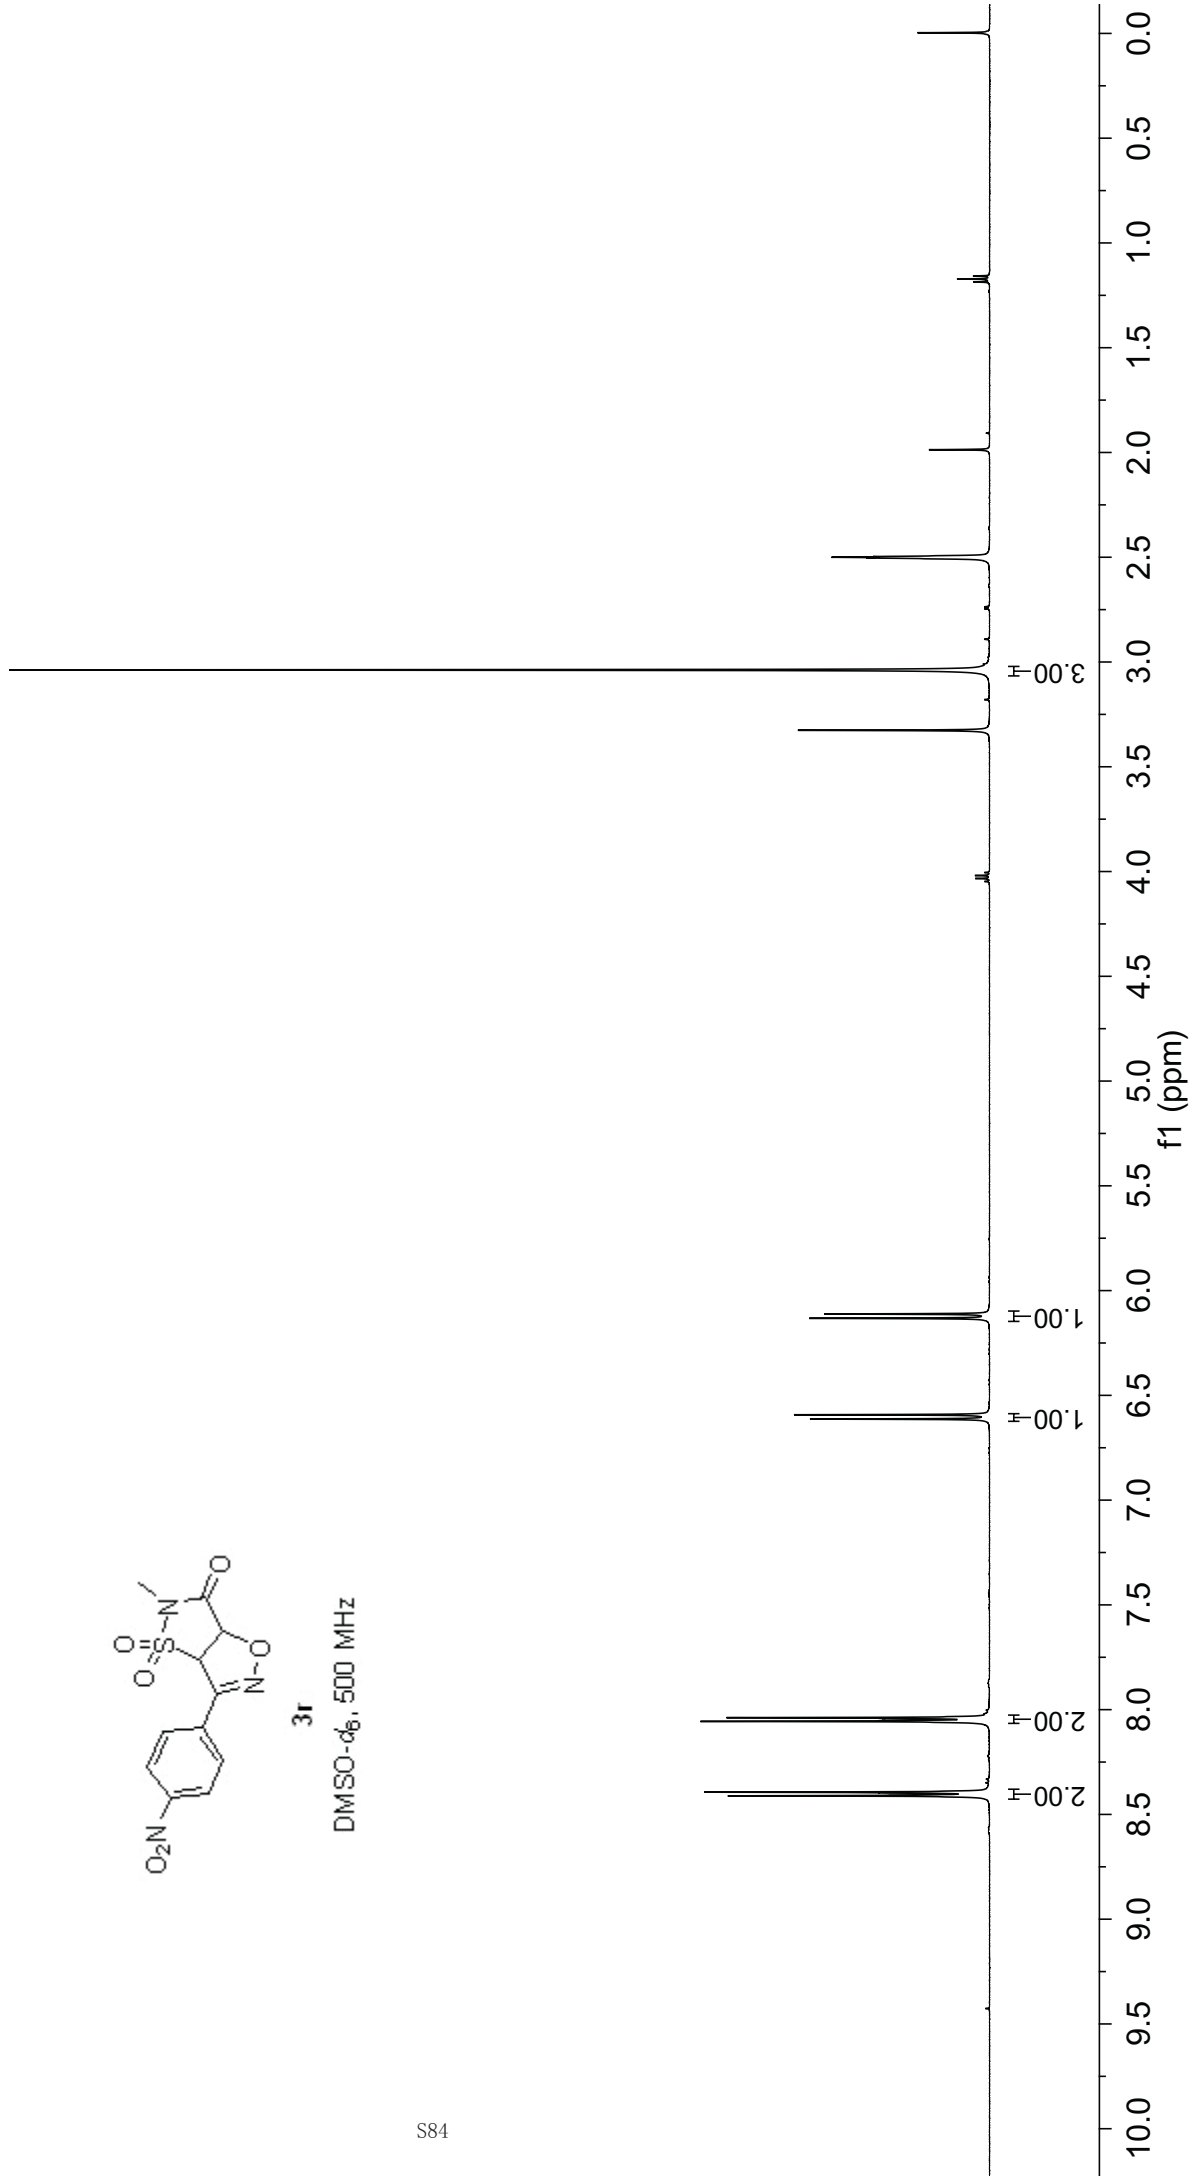

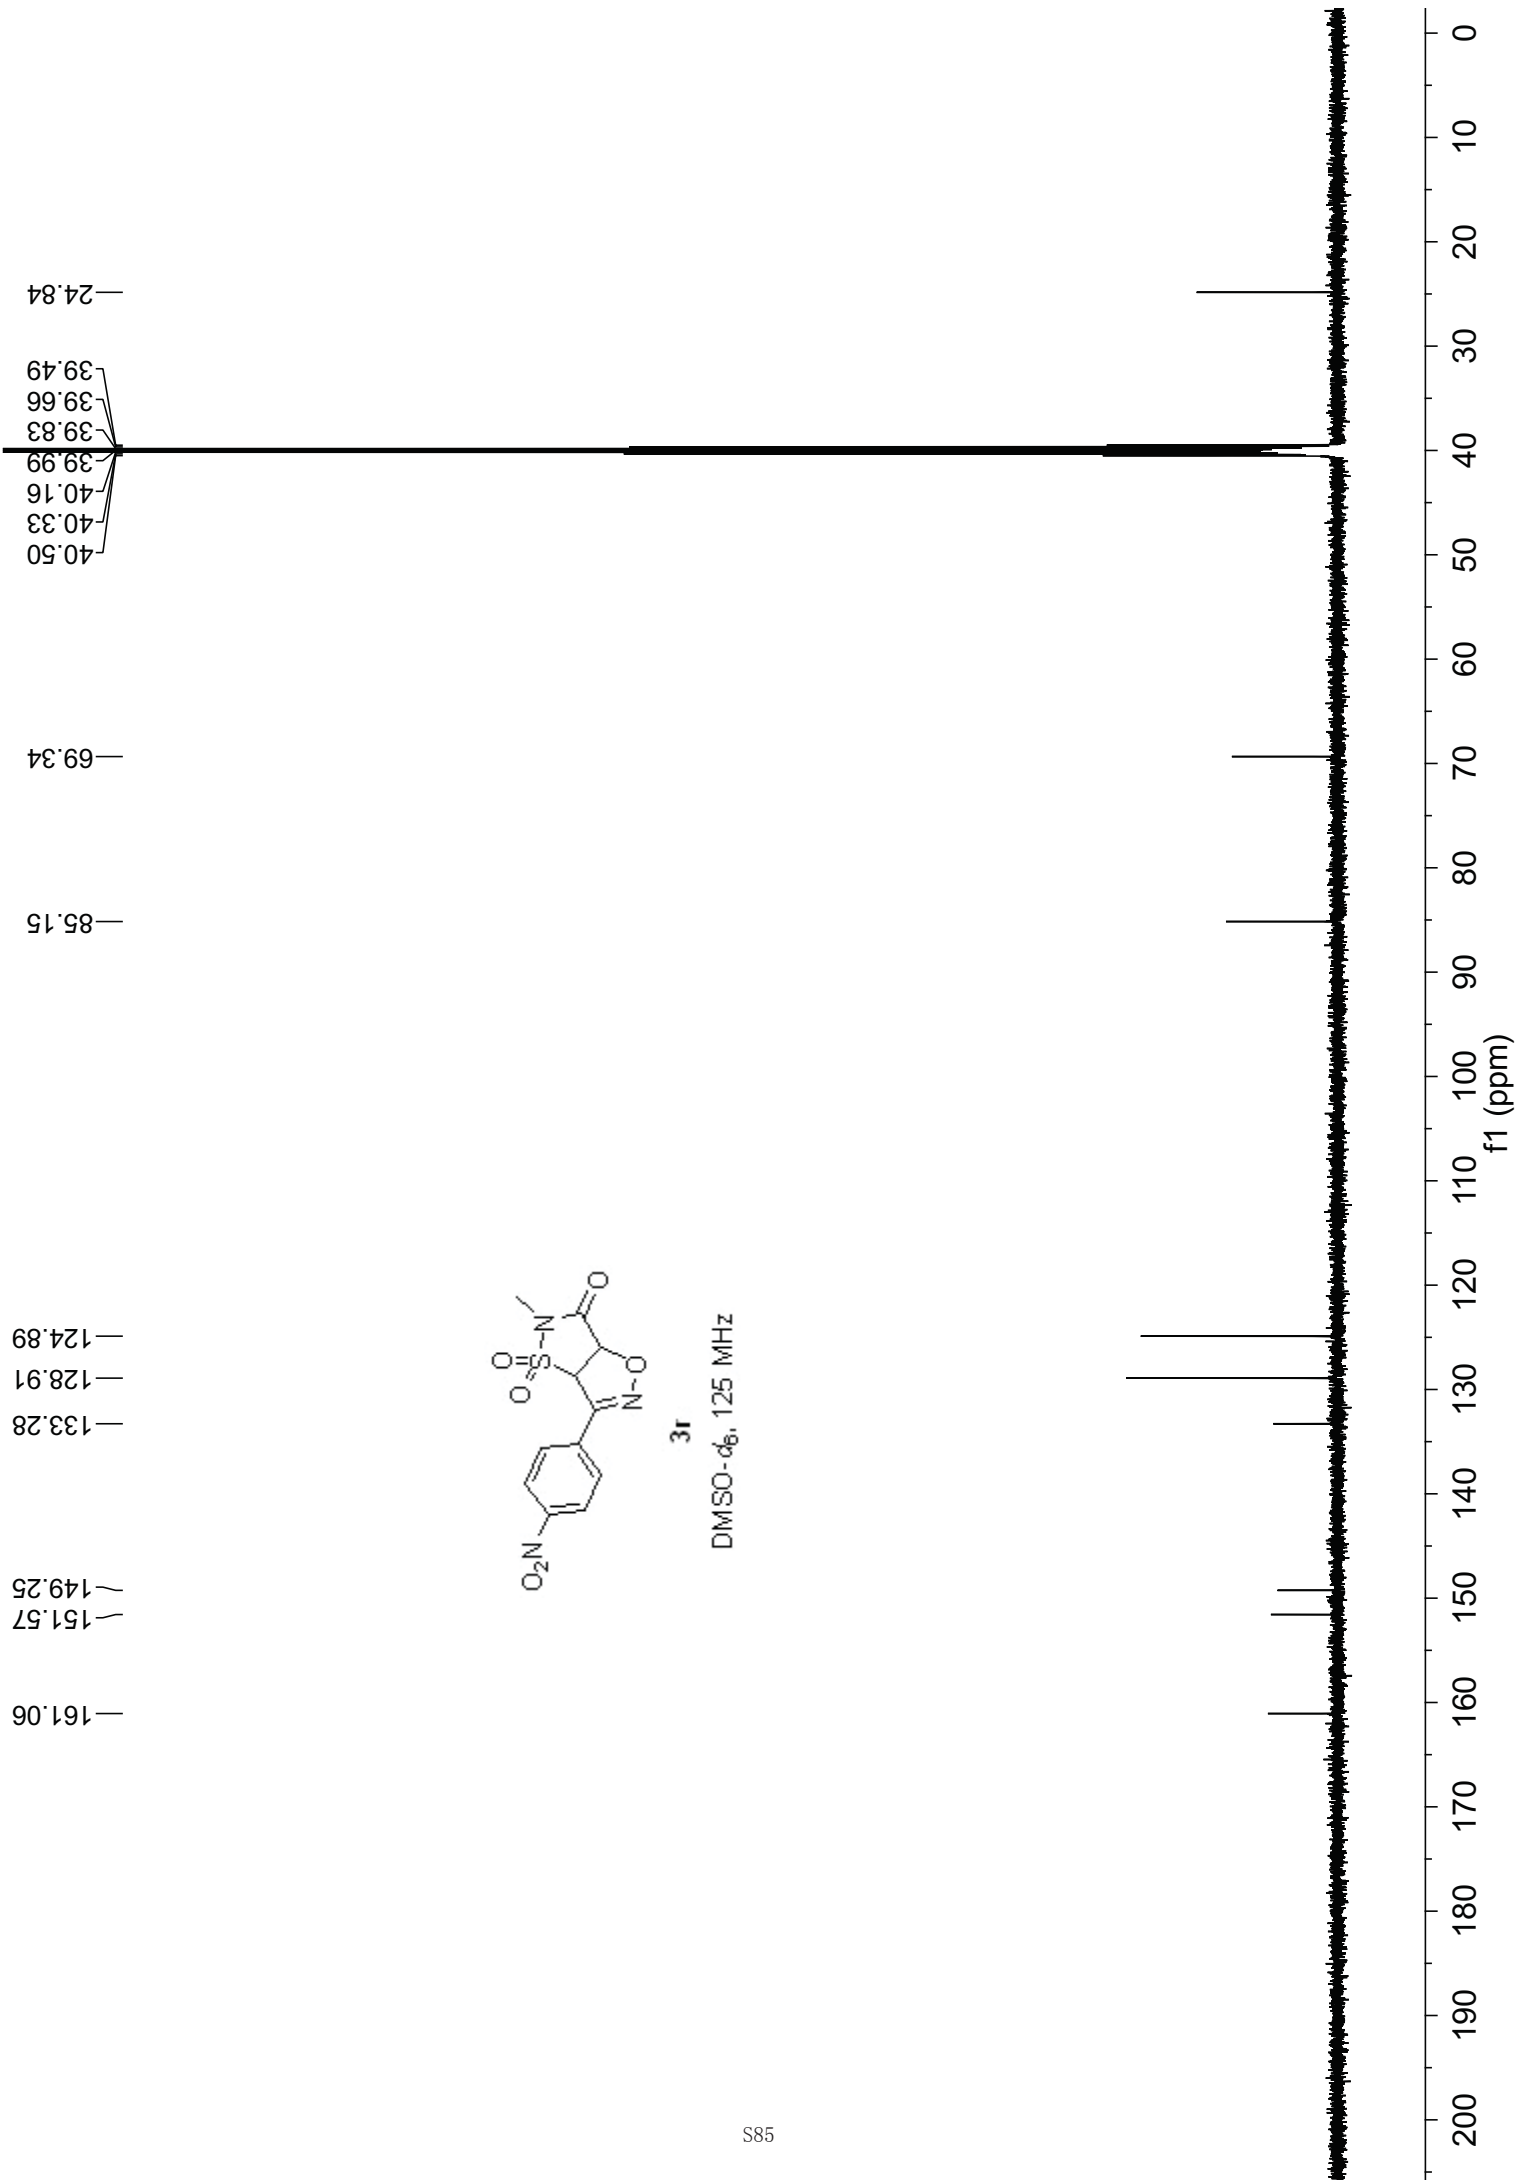

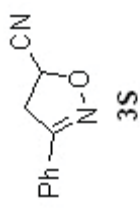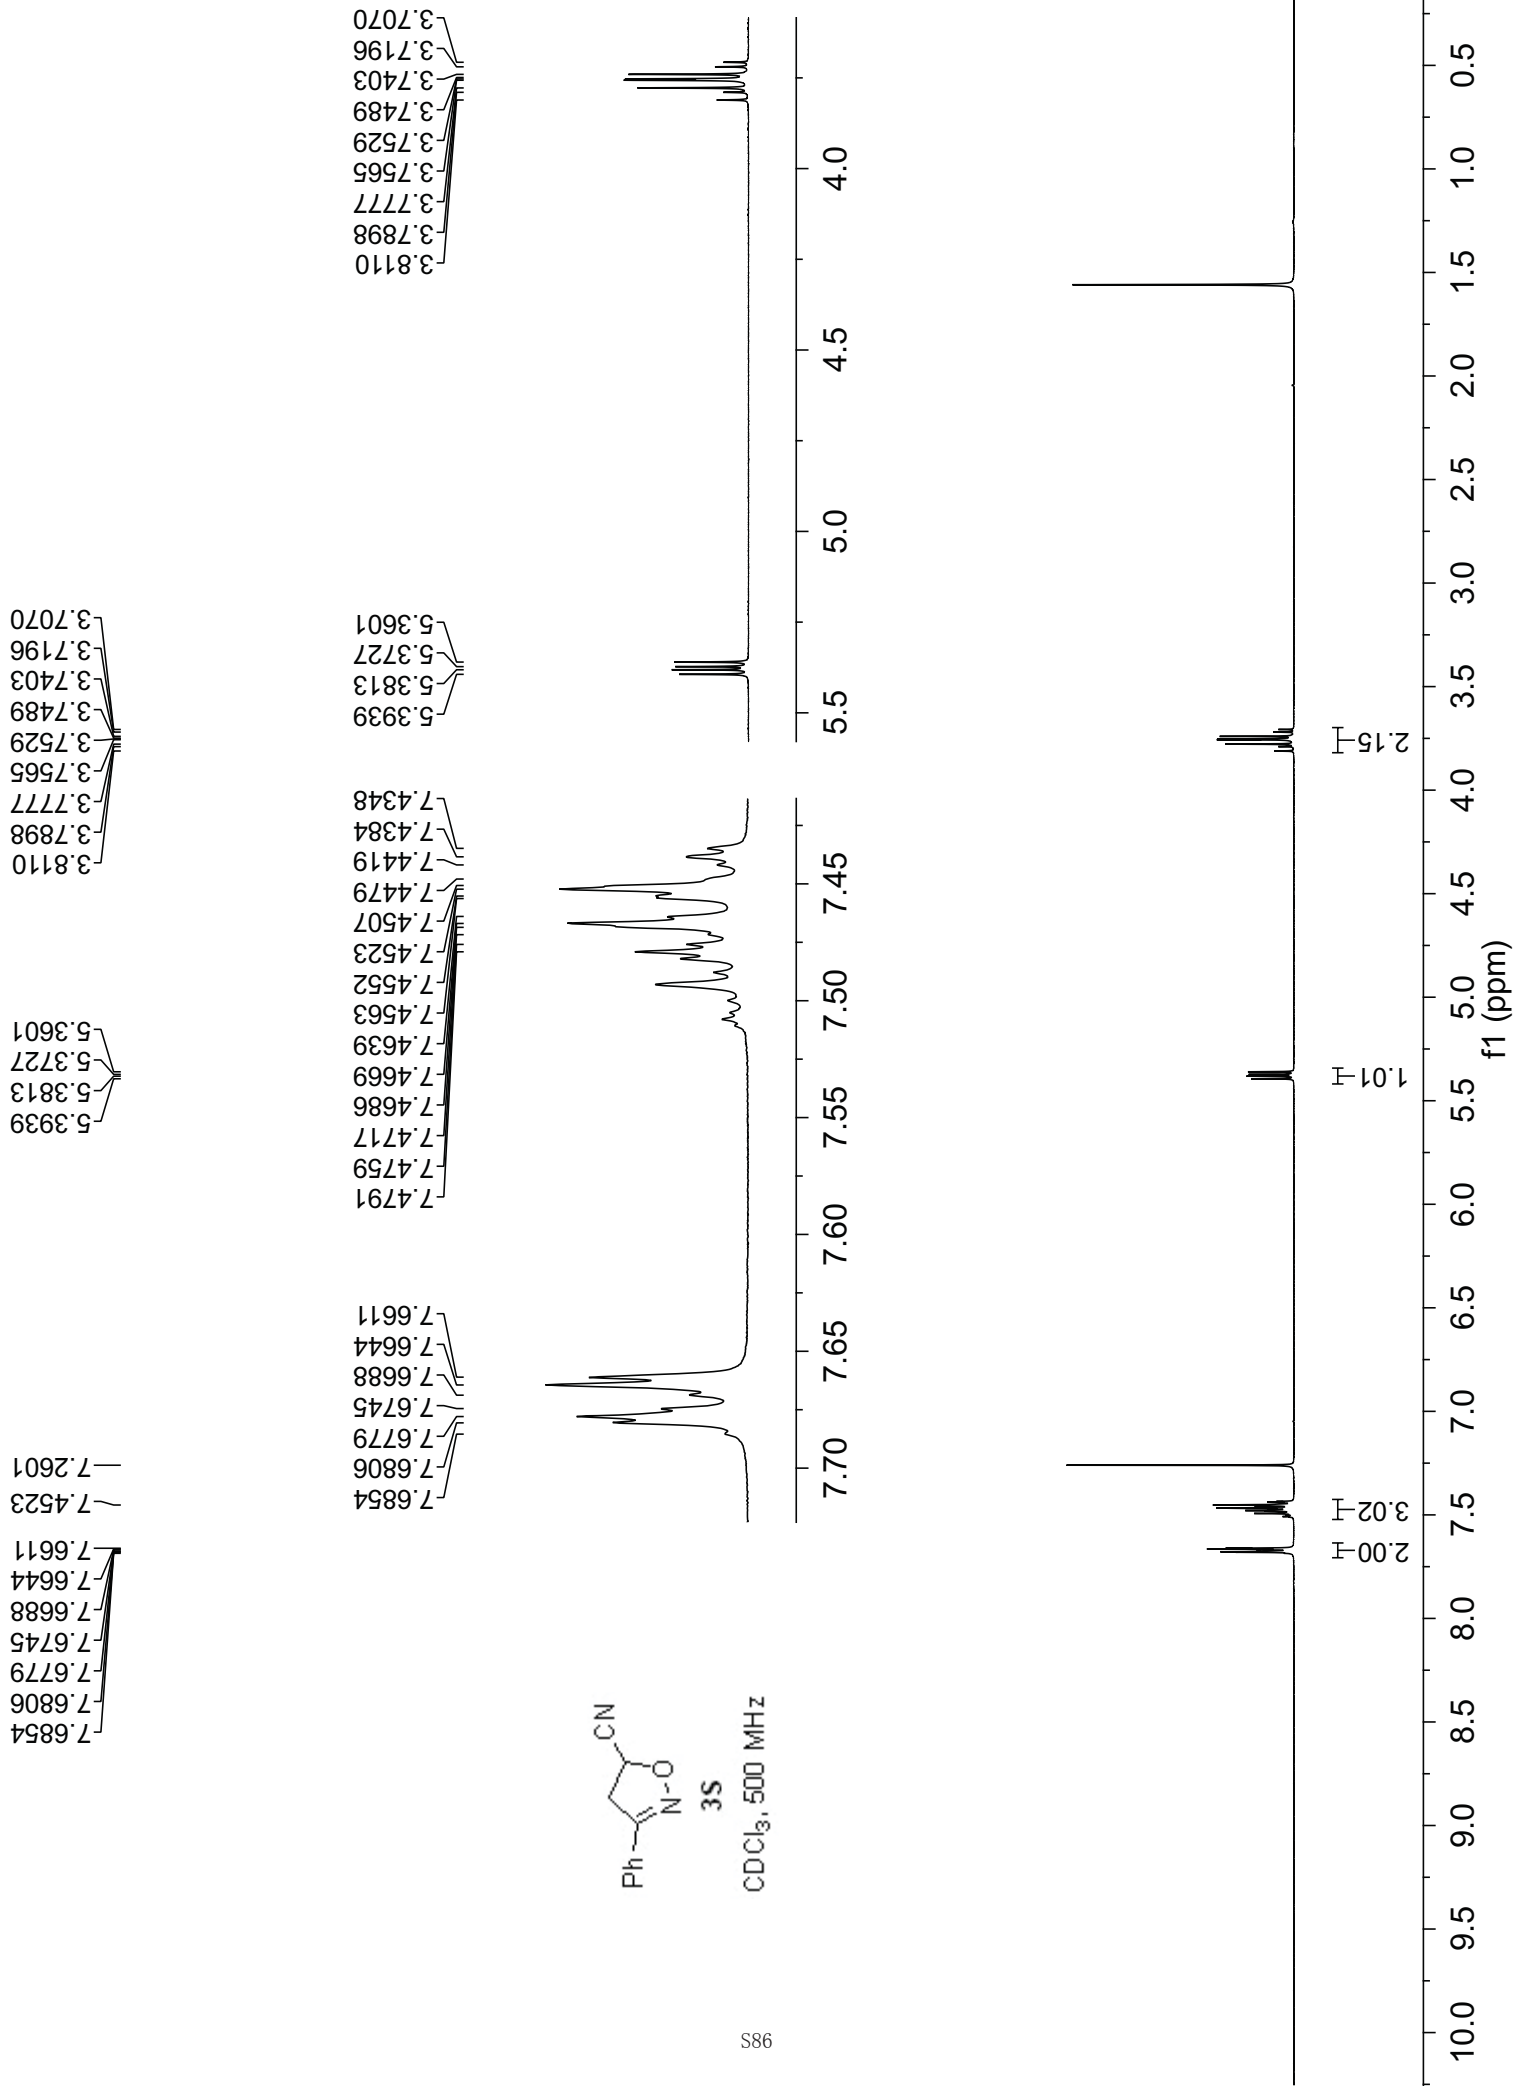

156.32  
131.29  
129.06  
127.38  
127.10  
117.10

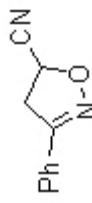

**3S**  
CDCl<sub>3</sub>, 125 MHz

77.33  
77.08  
76.82  
66.55  
41.17

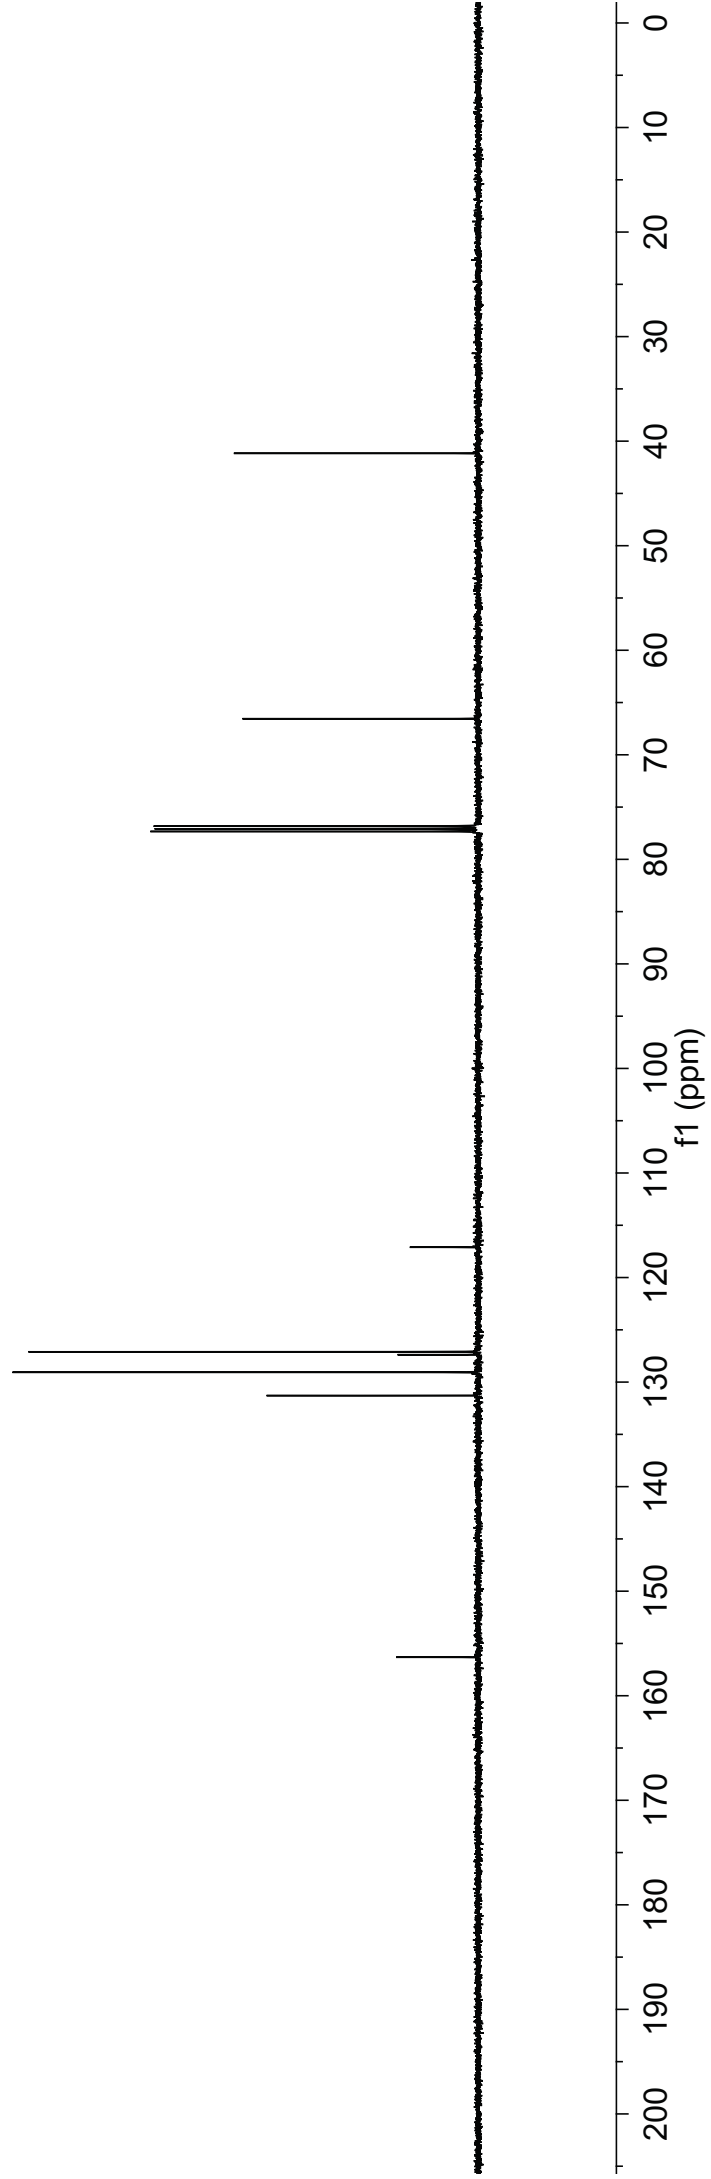

7.6817  
 7.6783  
 7.6750  
 7.6679  
 7.6663  
 7.6625  
 7.4141  
 7.4104  
 7.4084  
 7.4028  
 7.3995  
 7.3925  
 7.3887  
 7.2604  
 5.1789  
 5.1634  
 5.1580  
 5.1423  
 4.2158  
 4.2023  
 4.1888  
 3.6443  
 3.6411  
 3.6285  
 3.6200  
 1.6785  
 1.6618  
 1.6597  
 1.6530  
 1.6506  
 1.6484  
 1.6459  
 1.6350  
 1.3807  
 0.9416  
 0.9268  
 0.9120

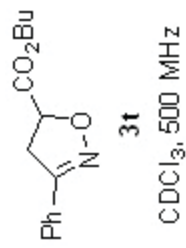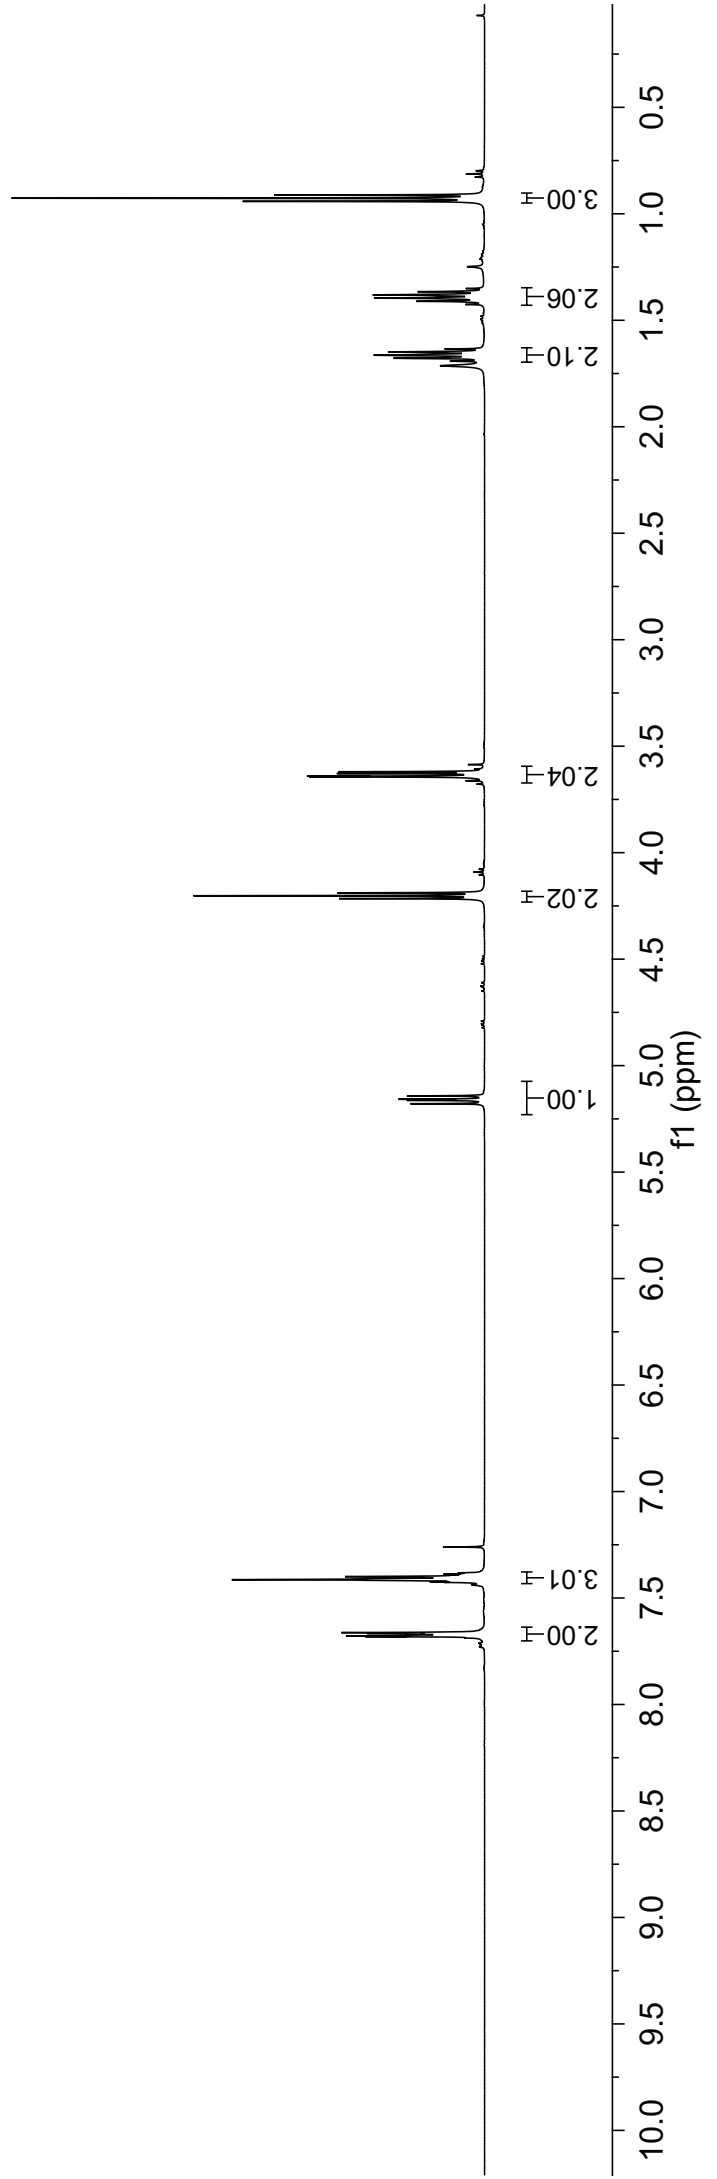



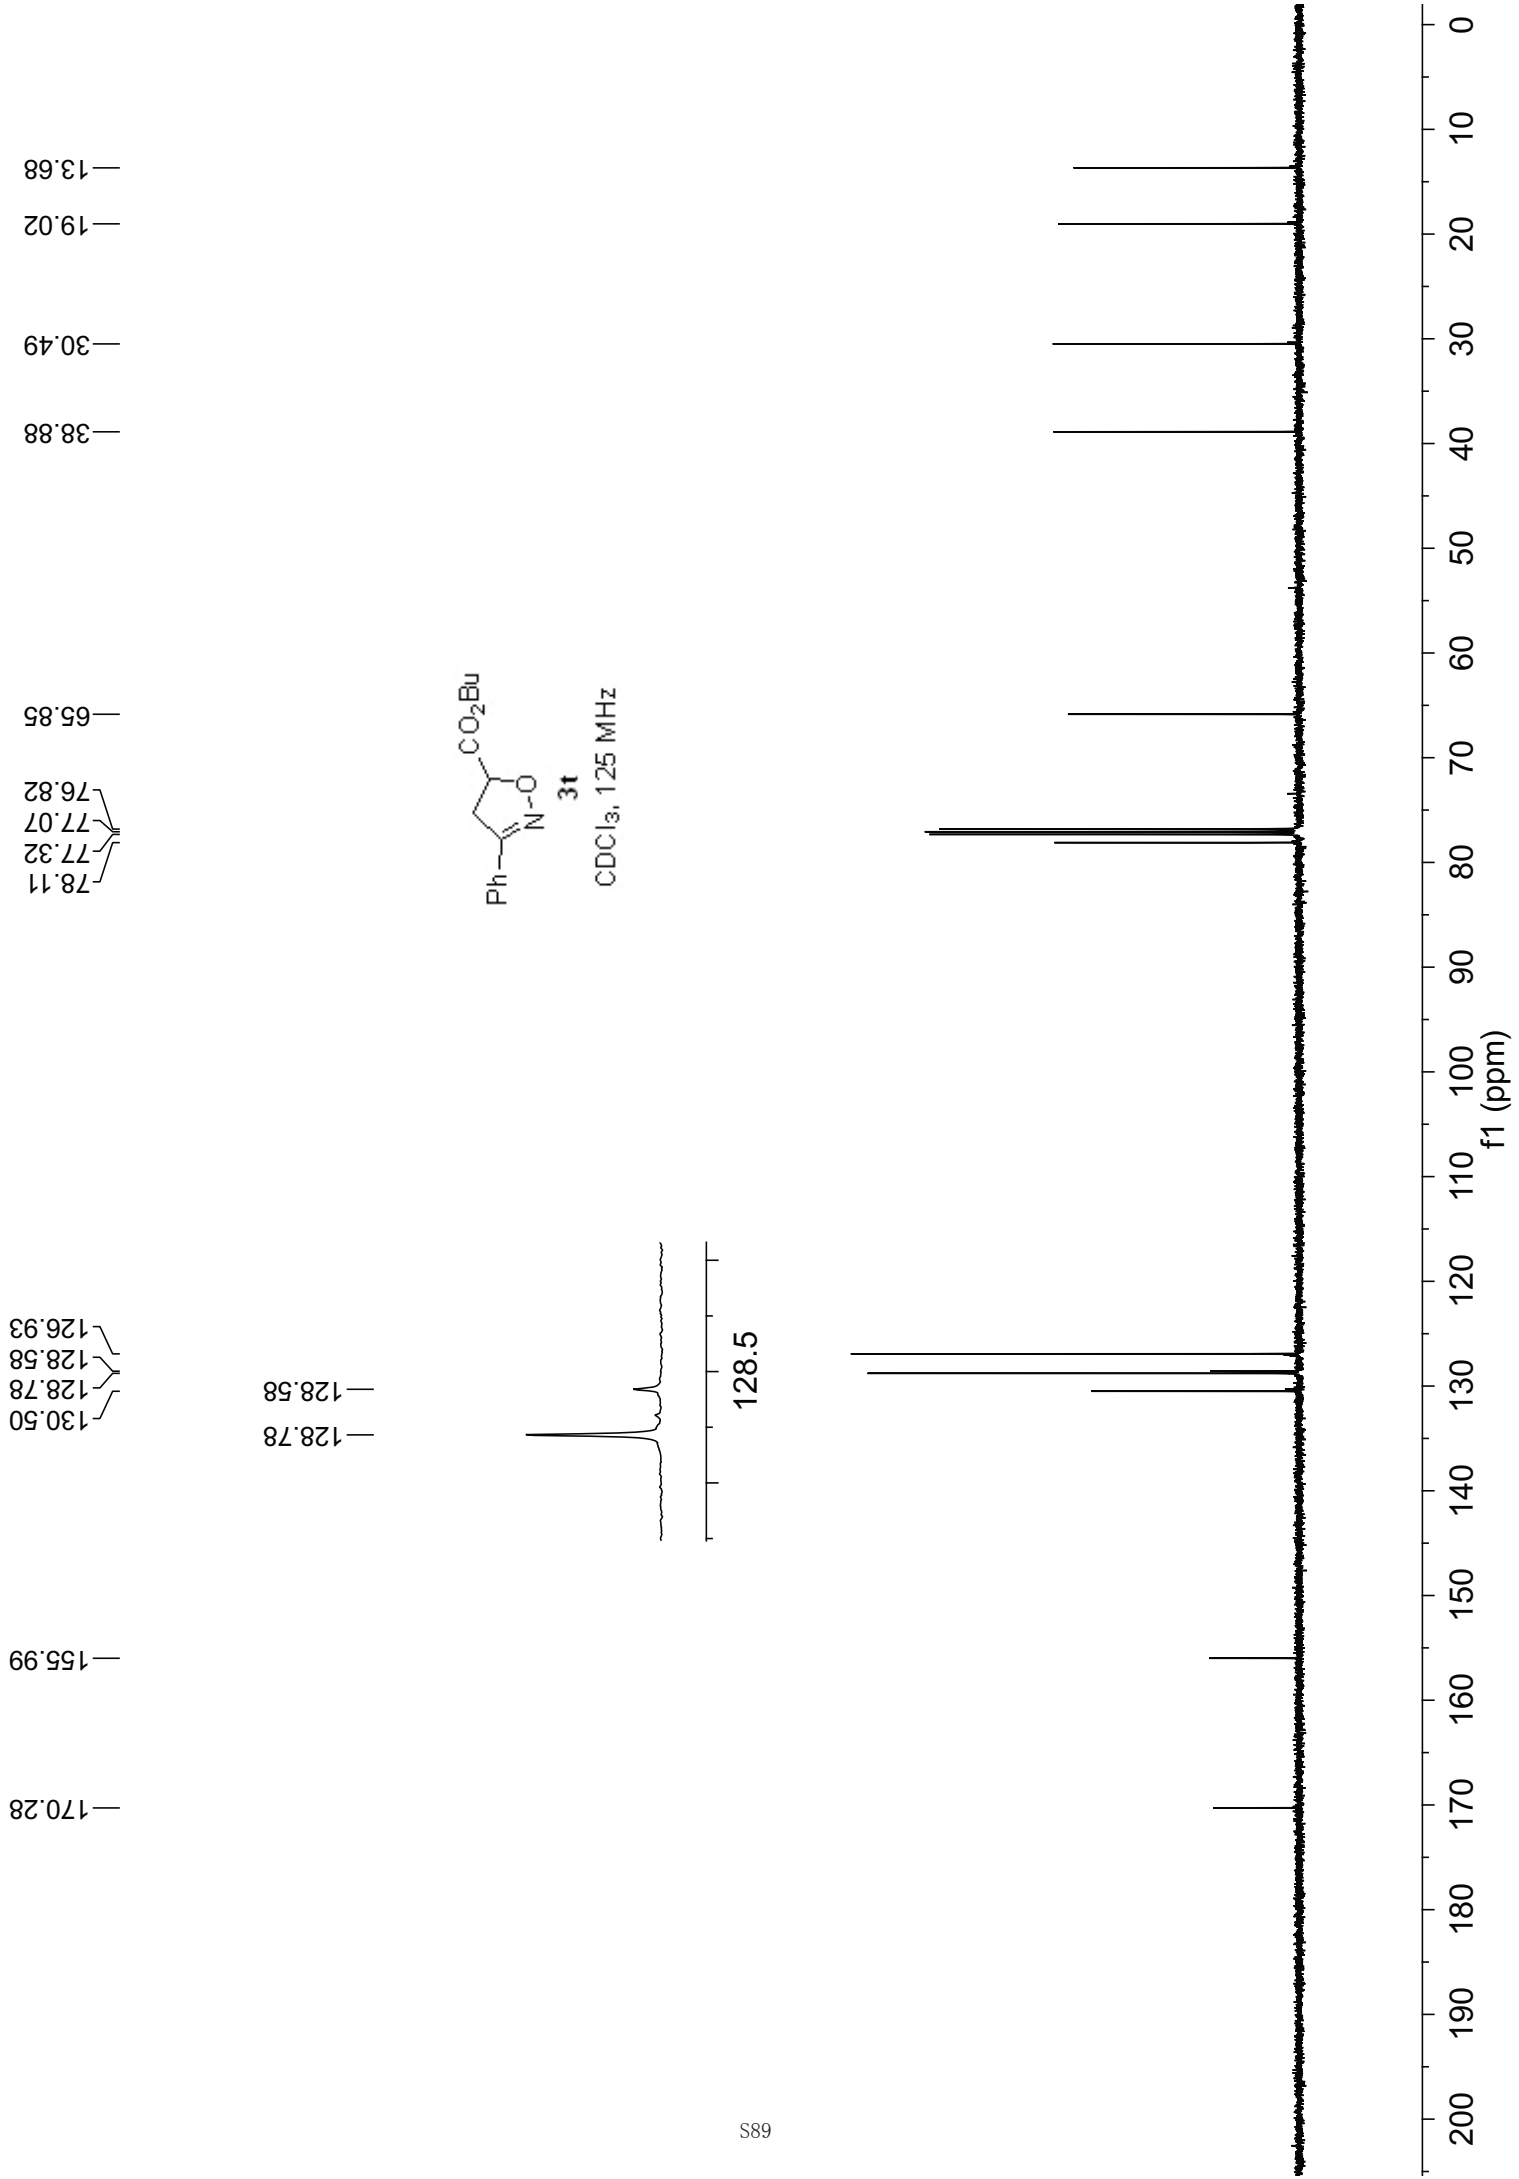

3.6850  
3.6696  
3.6513  
3.6470  
3.6360  
3.6257  
3.6134  
3.5921

5.2721  
5.2476  
5.2393  
5.2274  
5.2121  
5.2062  
5.1908

7.4140  
7.3953  
7.3791  
7.3677  
7.3521  
7.3374  
7.2604

7.6807  
7.6775  
7.6656  
7.6614

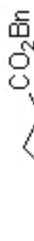

3u

CDCl<sub>3</sub>, 500 MHz

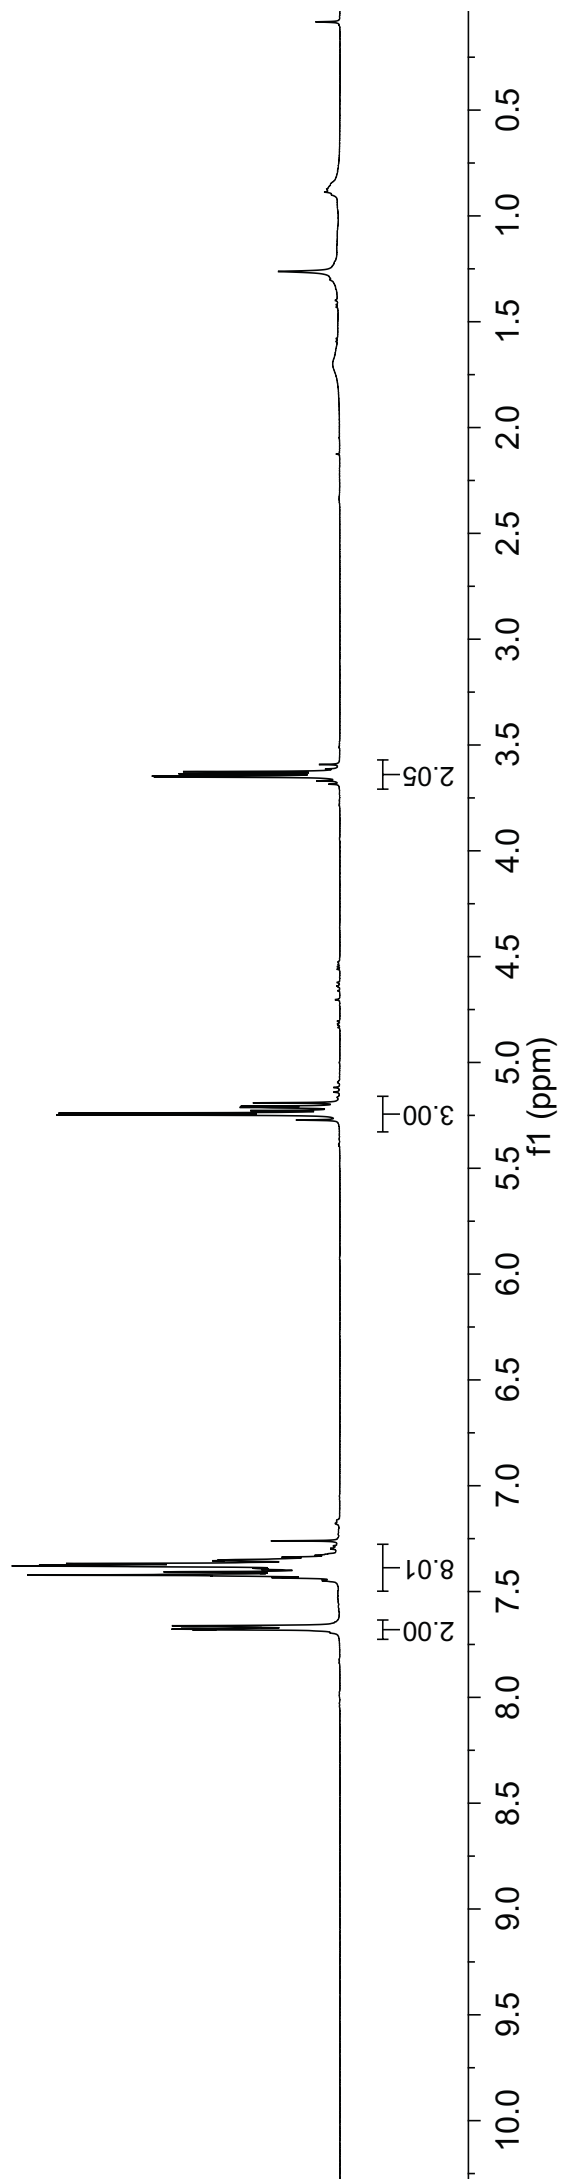

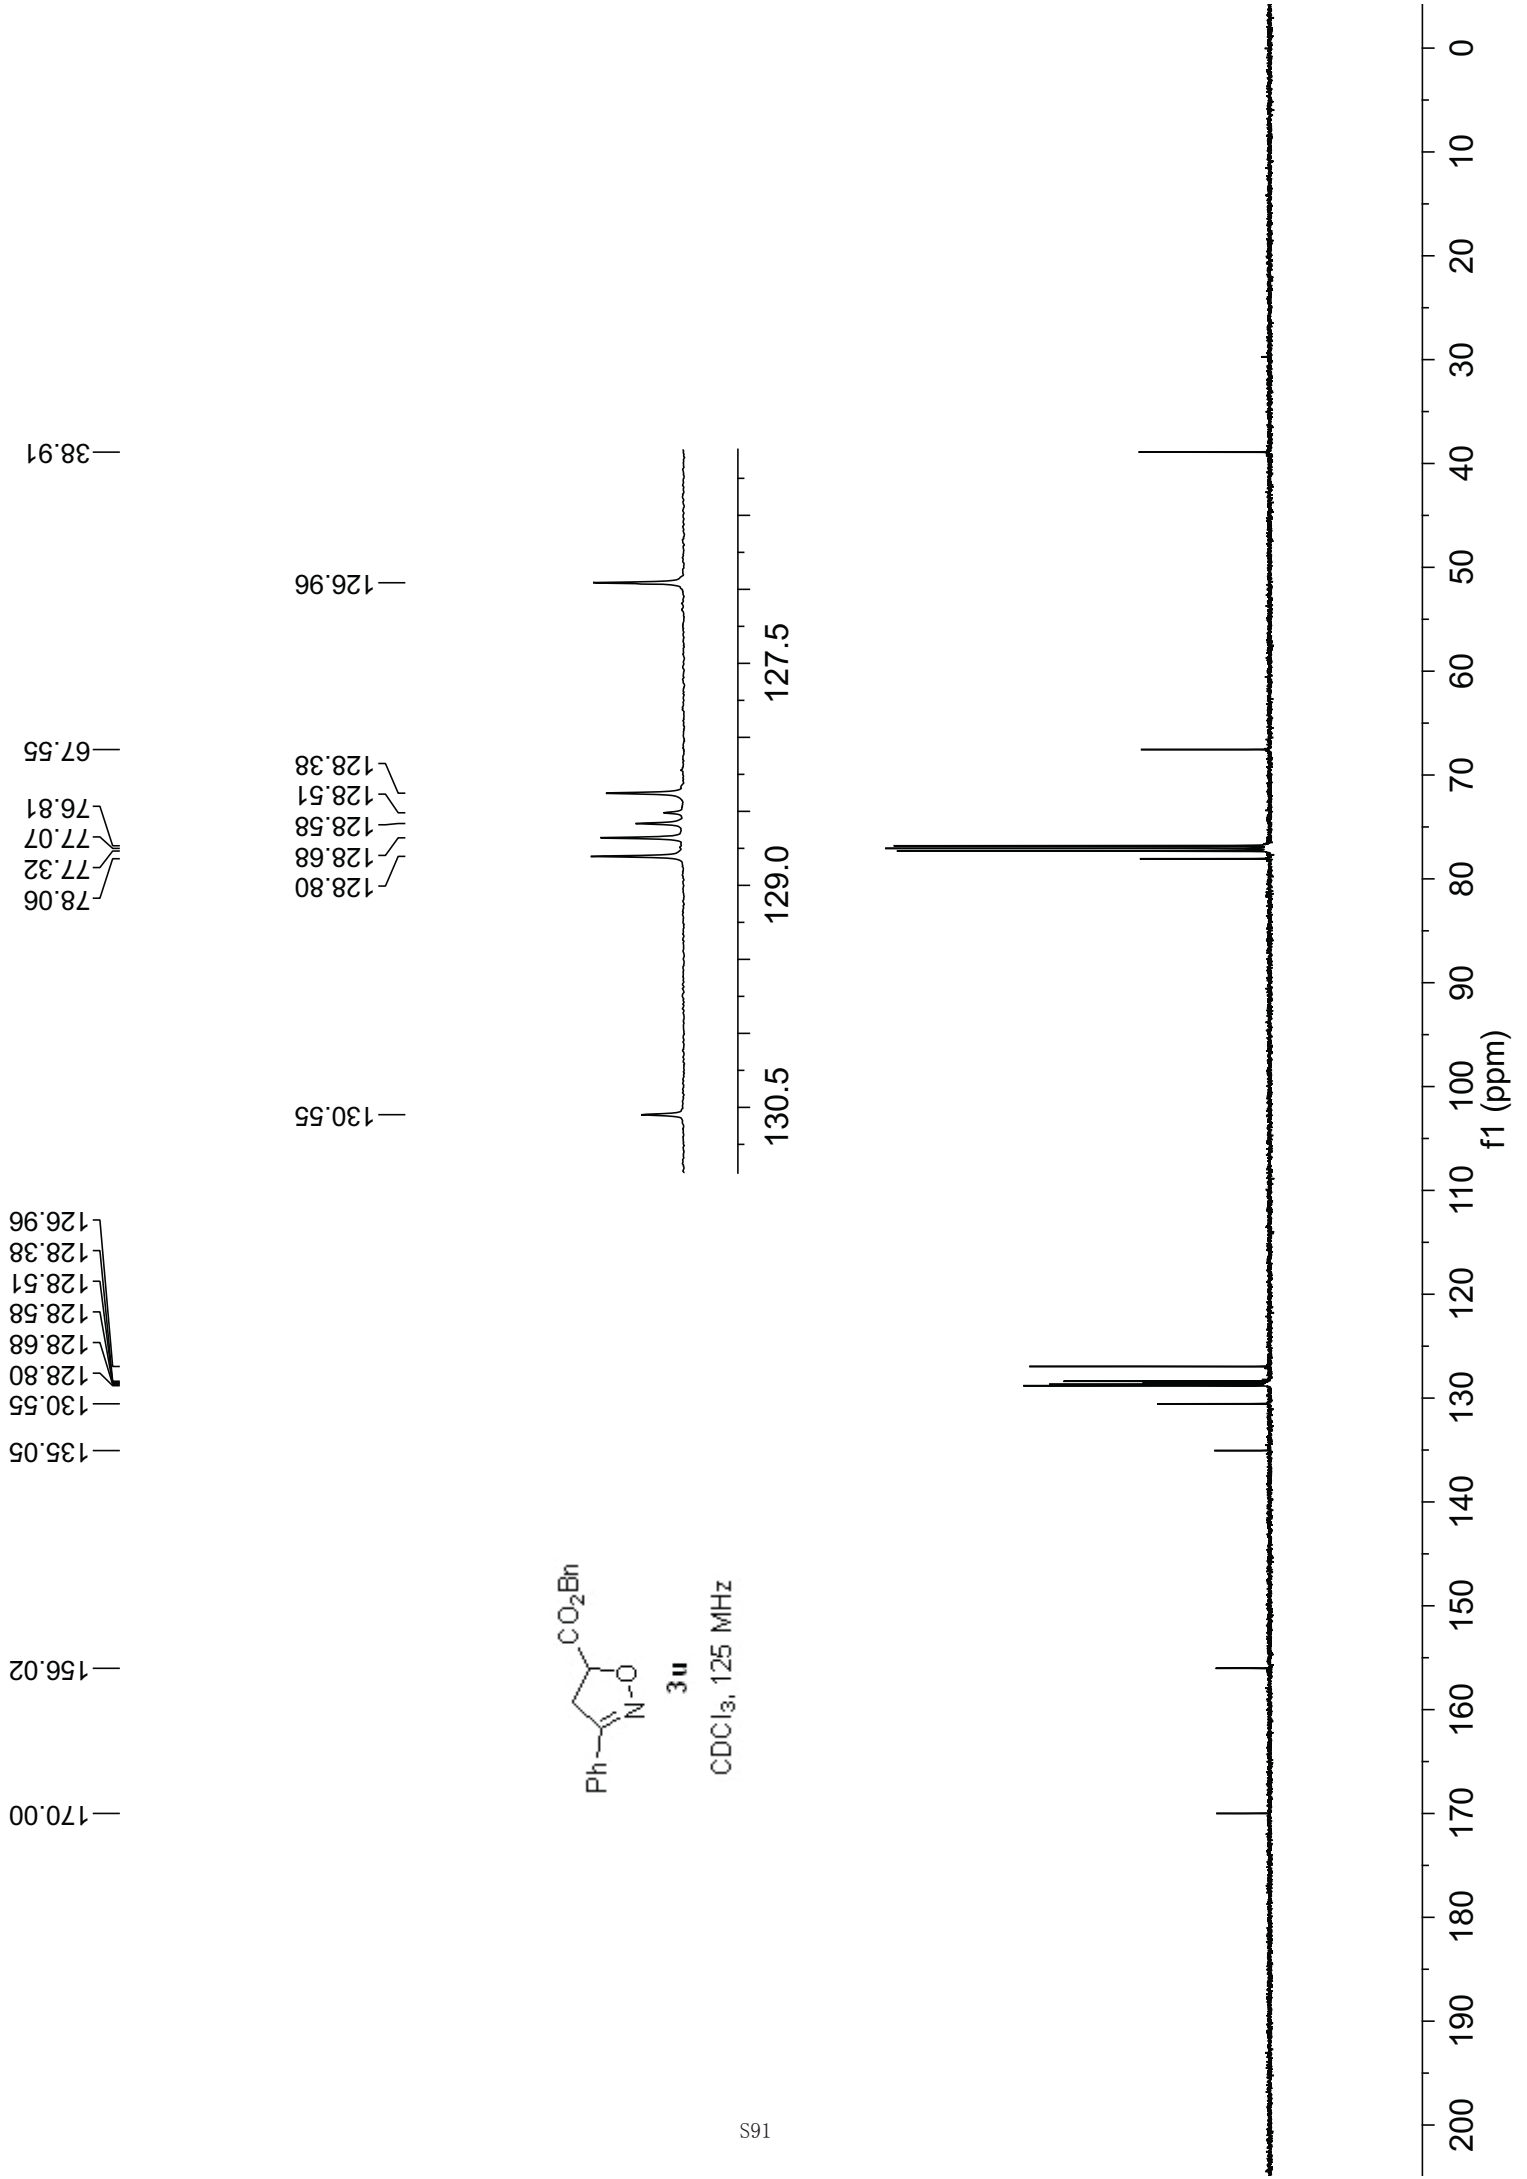

4.0175  
3.9037

7.2602  
7.4877

7.6804  
7.6839  
7.6881  
7.6937  
7.6970  
7.6997

7.5103  
7.5048  
7.4996  
7.4964  
7.4930  
7.4894  
7.4877  
7.4847  
7.4775  
7.4762  
7.4733  
7.4717  
7.4684  
7.4632  
7.4597  
7.4555

7.6997  
7.6970  
7.6937  
7.6881  
7.6839  
7.6804

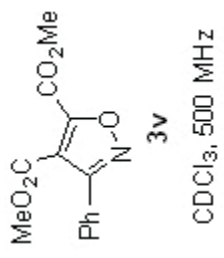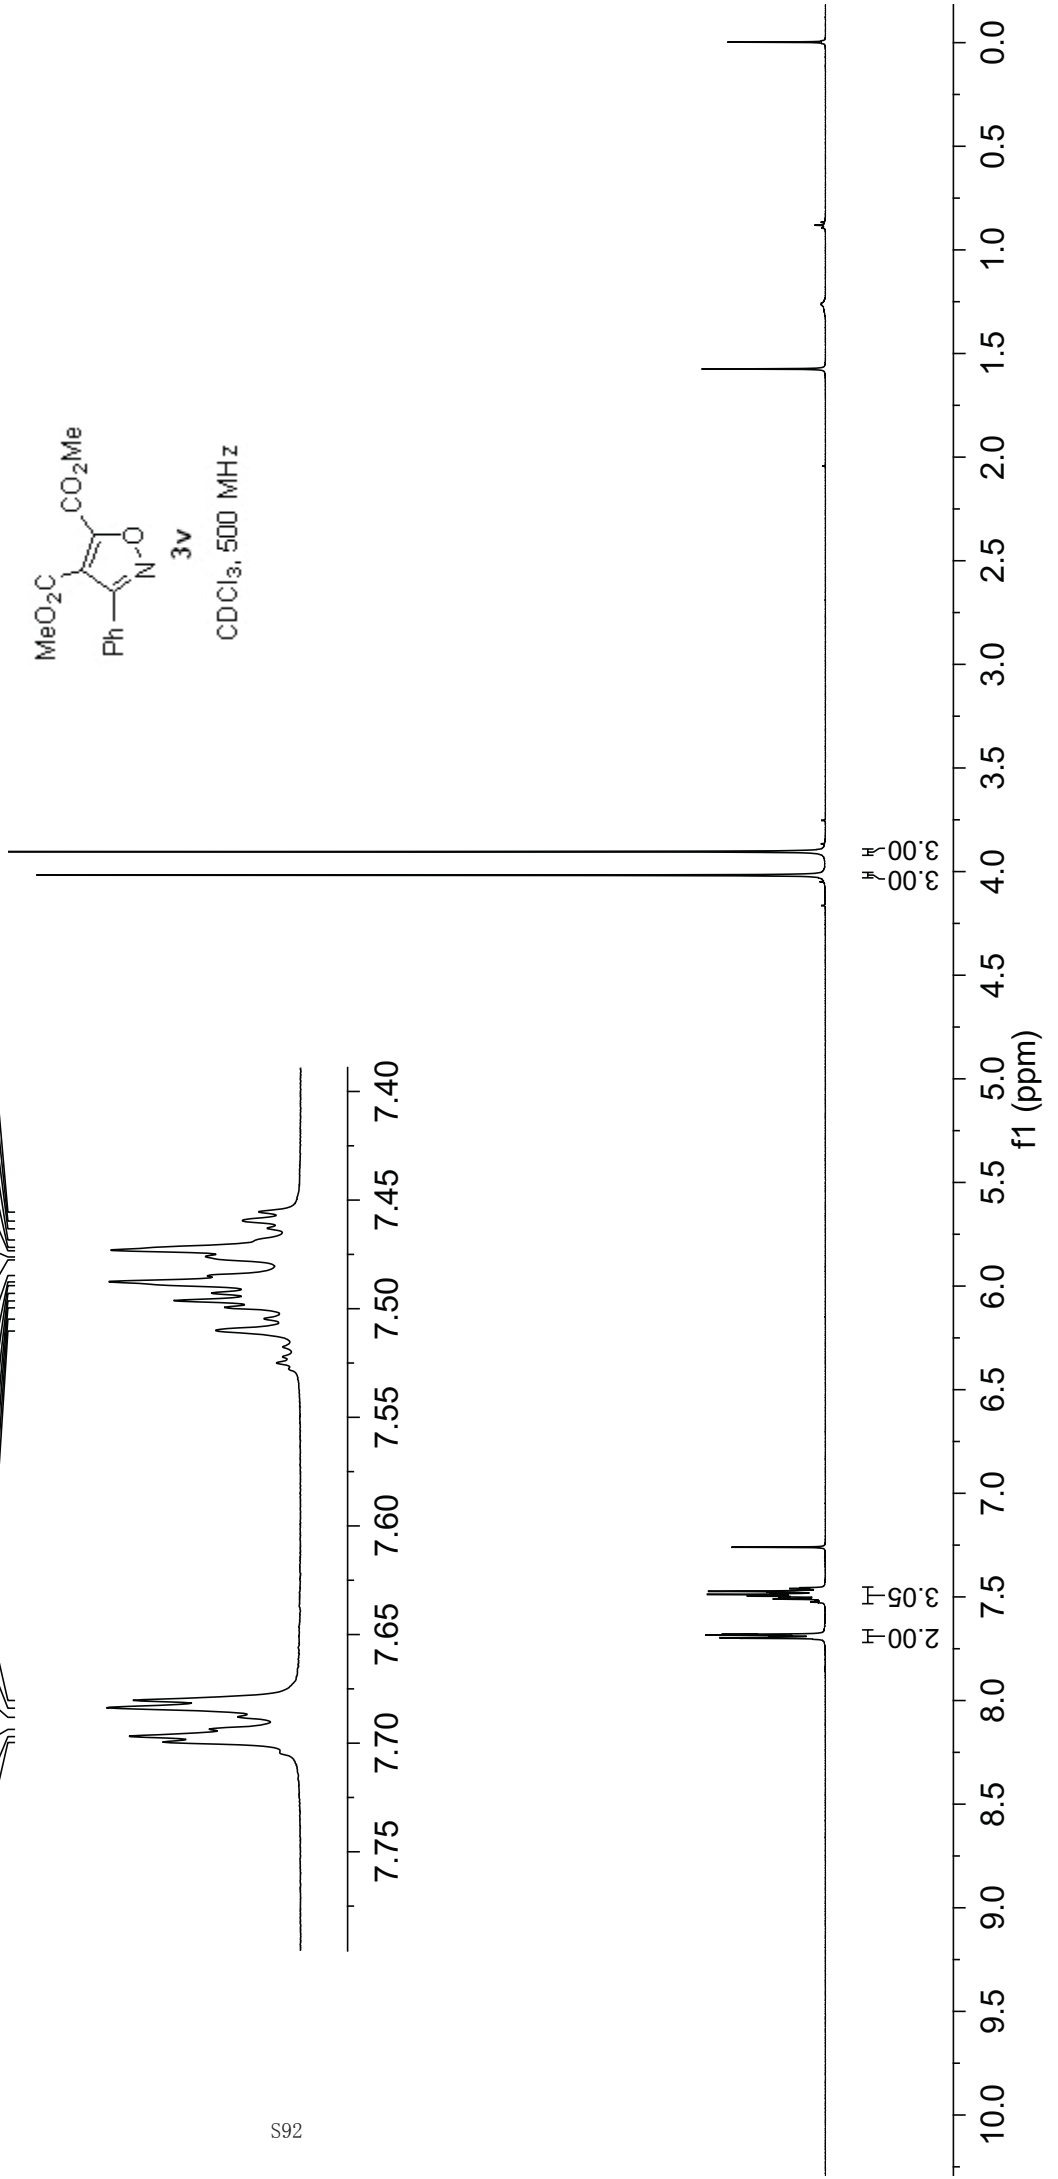

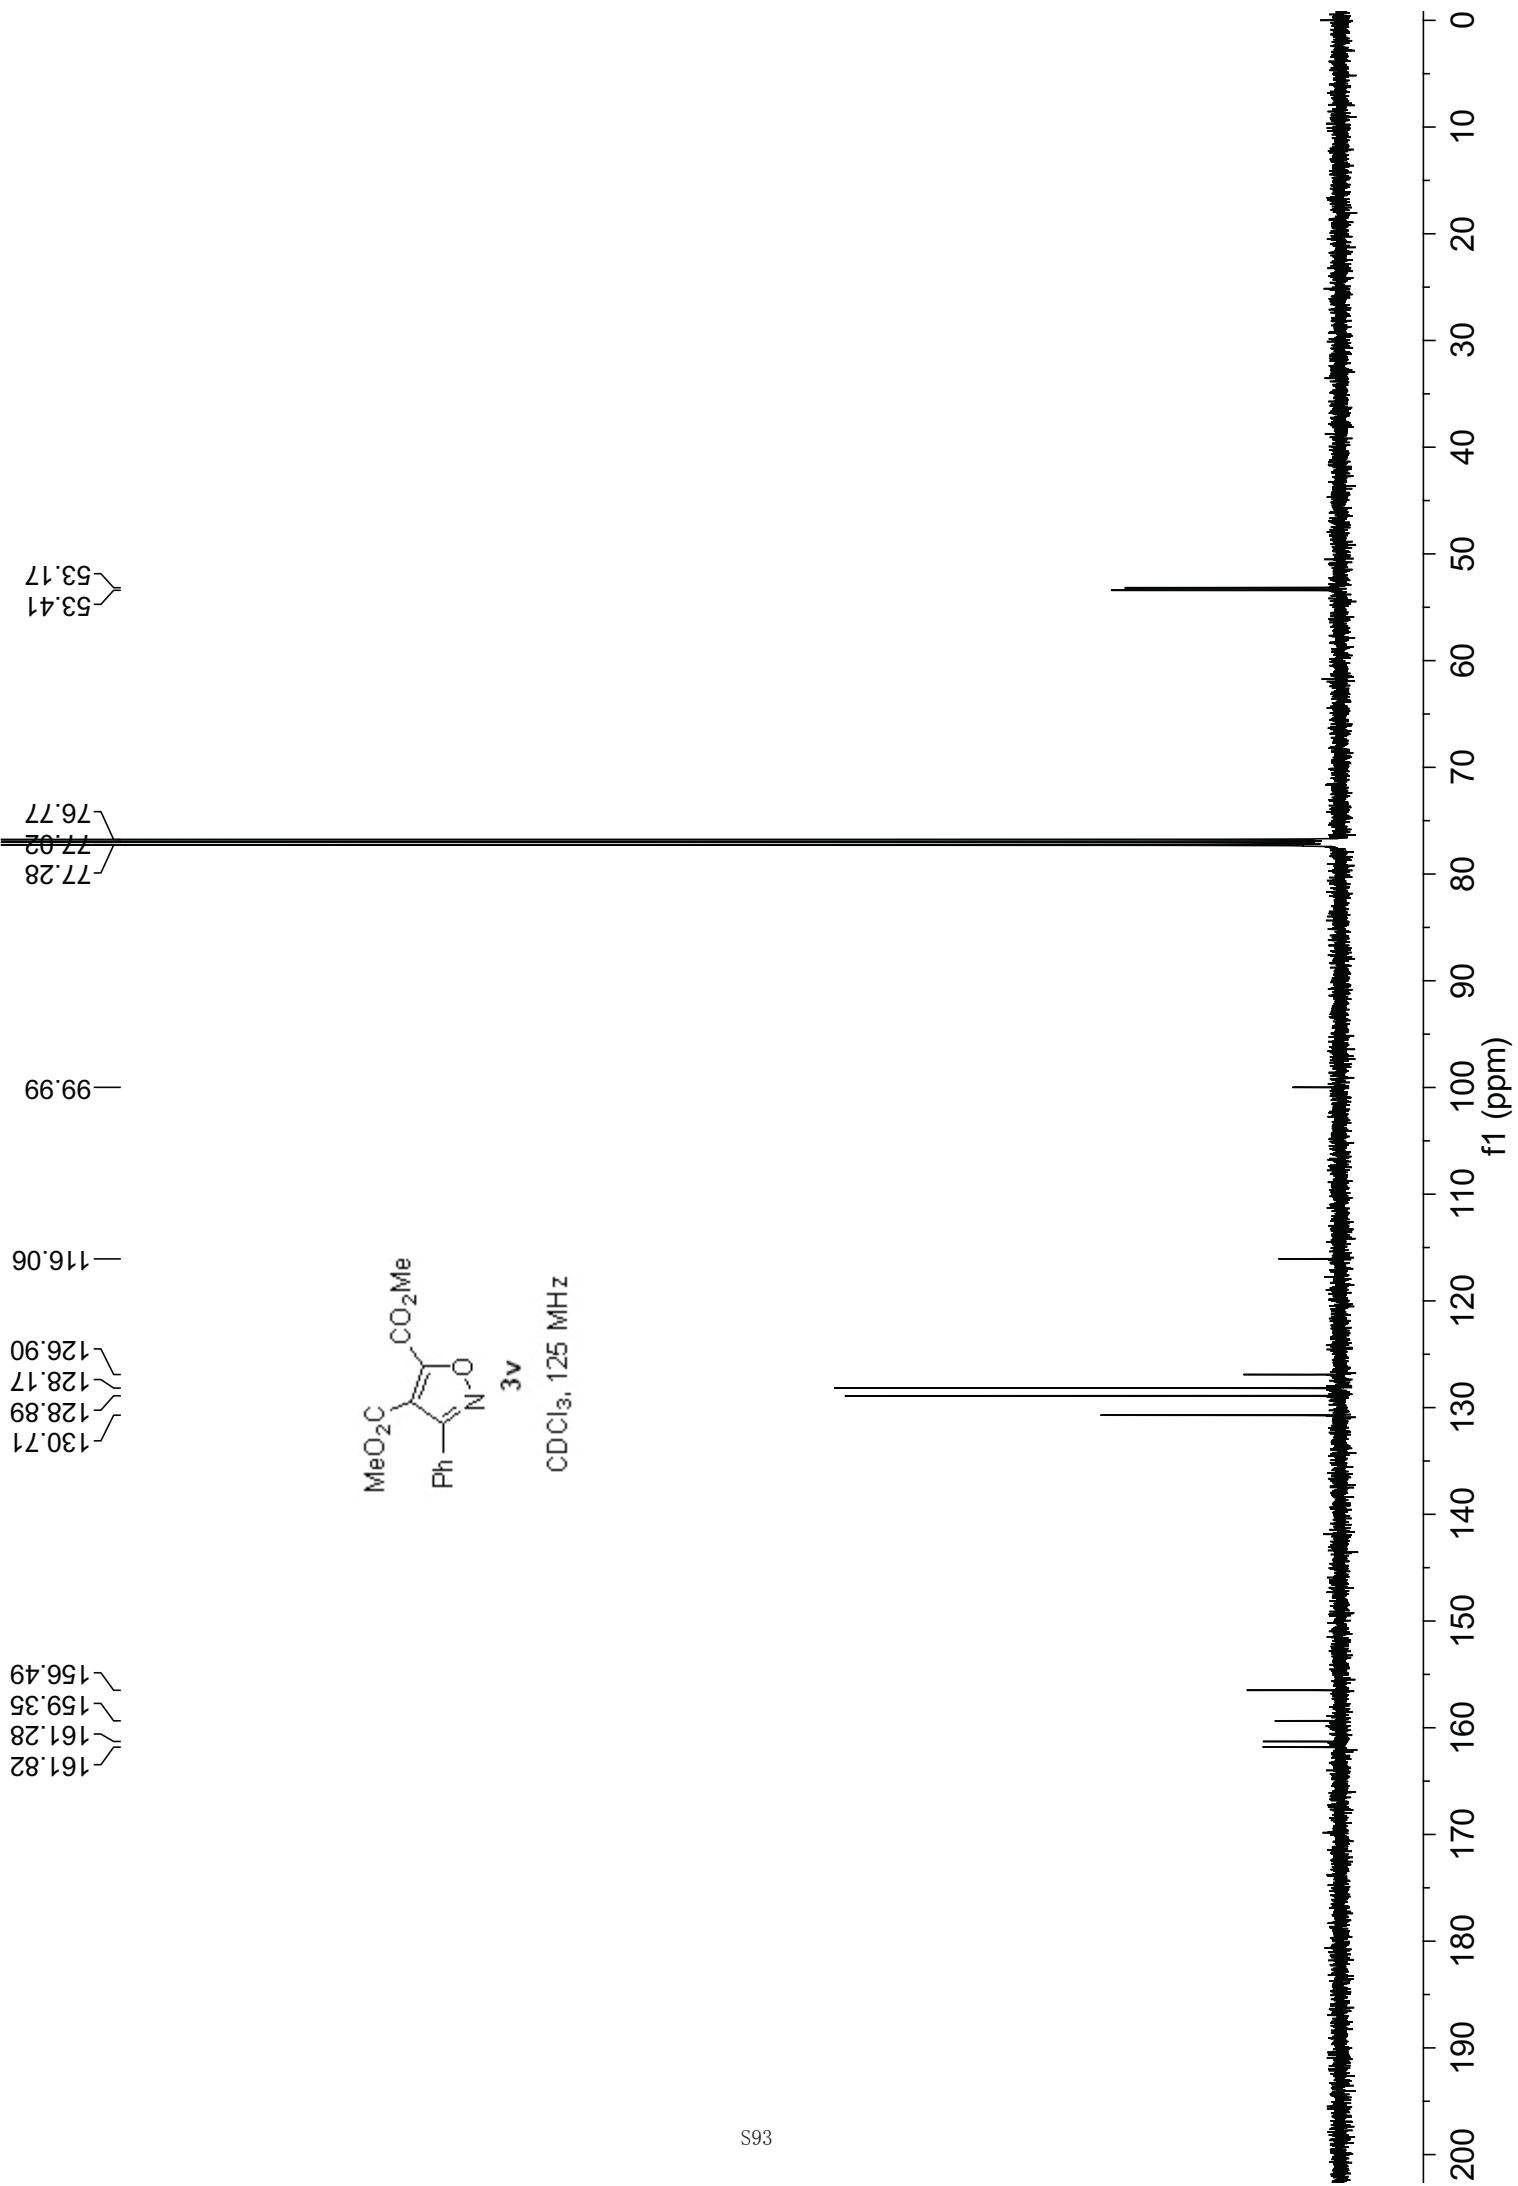

Supplement: c9ob00857h1.pdf [file c9ob00857h1.pdf]
